# Supplementary material for: Synthesis of tetrahydro-β-carbolines via isomerization of N-allyltryptamines: a metal-catalyzed variation on the Pictet–Spengler theme
Source: Royal Society of Chemistry journal article supplement (doi:10.1039/c2cc17704h), 2012-01-01

## Supporting Information

# Synthesis of Tetrahydro- $\beta$ -Carbolines via Isomerization of *N*-Allyltryptamines: A Metal-Catalyzed Variation on the Pictet-Spengler Theme

Erhad Ascic, Casper L. Hansen, Sebastian T. Le Quement, and Thomas E. Nielsen\*

*Department of Chemistry, Technical University of Denmark, DK-2800 Kgs. Lyngby, Denmark*

## Table of Contents

|    |                                                                                                                 |          |
|----|-----------------------------------------------------------------------------------------------------------------|----------|
| 1. | Table of Contents                                                                                               | S1       |
| 2. | General Methods                                                                                                 | S2-S3    |
| 3. | Optimization of Metal-Catalyzed THBC Synthesis ( <b>1a</b> to <b>2a</b> )                                       | S4-S9    |
| 4. | Synthetic Procedures and Analytical Data for Tryptamine Derivatives ( <b>3a-e</b> , <b>3j</b> and <b>1a-s</b> ) | S10-S22  |
| 5. | Synthesis of THBCs <b>2a-s</b>                                                                                  | S23-S29  |
| 6  | Synthesis of THBC <b>2o</b>                                                                                     | S30      |
| 7  | Synthesis of THBC <b>2a</b> : One-Pot Reaction                                                                  | S31      |
| 8  | Synthesis of THBCs <b>2a-e</b> and <b>2j</b> : Pd-Catalyzed Tsuji-Trost/Isomerization/Cyclization               | S32-S33  |
| 6. | RP-HPLC Chromatograms, IR-, <sup>1</sup> H-, and <sup>13</sup> C NMR Spectra for all Compounds                  | S34-S137 |

## General Methods

Unless otherwise stated, all reactions were run under an argon atmosphere. The glassware was dried over a Bunsen flame under vacuum, before contact with any of the reactants or solvents. All flasks were equipped with a rubber-septum, through which transport of chemicals, from or to the flask, was performed by use of a syringe equipped with a needle. Solvents were typically freshly distilled or dried over molecular sieves. All reactions were monitored by thin layer chromatography (TLC), reversed-phase high-performance liquid chromatography (RP-HPLC), and/or reversed-phase ultra-performance liquid chromatography mass spectrometry (RP-UPLC/MS).

All solvents were of HPLC quality, and all commercially available reagents were used without further purification. Typically all new compounds were characterized with  $^1\text{H}$  NMR and  $^{13}\text{C}$  NMR, IR, TLC, RP-HPLC, MS (ESI), HRMS (ESI) and melting point. Some compounds were characterized by HSQC, HMBC and/or melting point. Known compounds were characterized with  $^1\text{H}$ - and  $^{13}\text{C}$  NMR, TLC, RP-HPLC and MS alone. Intermediates, *N*-benzyl-(6-methoxy)tryptamine (**3j**), *N*-benzyl-(7-methyl)tryptamine, *N*-benzyl-(5-methyl)tryptamine, *N*-benzyl-(5-fluoro)tryptamine, and *N*-benzyl-(5-bromo)tryptamine were only characterized by  $^1\text{H}$  NMR.

*In vacuo* evaporation of solvents was performed using a rotary evaporator under house vacuum at various temperatures.

Analytical TLC was conducted using Merck aluminium sheets covered with silicagel C-60 F<sub>254</sub>. The plates were either visualized under UV-light or stained by dipping in a developing agent followed by heating. KMnO<sub>4</sub> (3 g in H<sub>2</sub>O (300 mL) along with K<sub>2</sub>CO<sub>3</sub> (20 g) and 5% aqueous NaOH (5 mL)) and/or phosphomolybdic acid (PMA) (10 g in 200 mL EtOH) were used as developing agent.

Flash chromatography was performed using a glass column which was packed with Matrex 60 Å silicagel (35 – 70 µm particles) as stationary phase. The liquid phase is specified in the experimental procedures.

Analytical HPLC was conducted on a Water Alliance 2695 RP-HPLC system using a Symmetry® C-18 column (*d* 2.5 µm, 4.6 x 75 mm, column temp: 25 °C flow 1 mL/min) with detection at 215 nm and 254 nm. Eluents A (0.1% TFA in H<sub>2</sub>O) and B (0.1% TFA in MeCN) were used in a linear gradient (100% A to 100% B) in a run time of 13 min. HPLC analysis of screening experiments was performed using a linear gradient (100% A to 100% B) in a run time of 23 min.

For the recording of  $^1\text{H}$  NMR and  $^{13}\text{C}$  NMR either a Varian Mercury-300 spectrometer (operating at 300 MHz for proton and 75 MHz for carbon), or a Varian Unity Inova-500 spectrometer (operating at 500 MHz for  $^1\text{H}$  NMR) were used. HSQC and HMBC were also recorded on a Varian Unity Inova-500 spectrometer. The chemical shifts ( $\delta$ ) are reported in parts per million (ppm) and the coupling constants (*J*) in Hz. Usually DMSO-*d*<sub>6</sub> and CDCl<sub>3</sub> were used as the solvent and signal positions were measured relative to the signal for DMSO ( $\delta$  2.50 ppm for  $^1\text{H}$  NMR and  $\delta$  39.43 ppm for  $^{13}\text{C}$  NMR) and CHCl<sub>3</sub> ( $\delta$  7.26 ppm, for  $^1\text{H}$  NMR and  $\delta$  77.36 ppm for  $^{13}\text{C}$  NMR). Multiplicities of peaks in  $^1\text{H}$  NMR are given as: s (singlet), d (doublet), t (triplet), dd (double doublet), ddd (double double doublet), dddd (double double double doublet), dt (double triplet), ddt (double double triplet), t (triplet) td (triplet of doublet), tt (triplet of triplet), ddq (double double quartet), dqd (double quartet of doublets), dp (double pentet), and m (multiplet).

IR analysis was performed on a Bruker Alpha FT-IR spectrometer and reported in frequency of absorption ( $\text{cm}^{-1}$ ).

Analytical LC/MS (ESI) analysis was performed on a Waters AQUITY RP-UPLC system equipped with a diode array detector using an AQUITY UPLC BEH C-18 column ( $d$  1.7  $\mu\text{m}$ , 2.1 x 50 mm; column temp: 65  $^{\circ}\text{C}$ ; flow: 0.6 mL/min). Eluents A (0.1%  $\text{HCO}_2\text{H}$  in  $\text{H}_2\text{O}$ ) and B (0.1%  $\text{HCO}_2\text{H}$  in acetonitrile) were used in a linear gradient (5% B to 100% B) in a total run time of 2.6 min. The LC system was coupled to a SQD mass spectrometer. Analytical LC-HRMS (ESI) analysis was performed on an Agilent 1100 RP-LC system equipped with a diode array detector using a Phenomenex Luna C-18 column ( $d$  3  $\mu\text{m}$ , 2.1 x 50 mm; column temp: 40  $^{\circ}\text{C}$ ; flow: 0.4 mL/min). Eluents A (0.1%  $\text{HCO}_2\text{H}$  in  $\text{H}_2\text{O}$ ) and B (0.1%  $\text{HCO}_2\text{H}$  in acetonitrile) were used in a linear gradient (20% B to 100% B) in a total run time of 15 min. The LC system was coupled to a Micromass LCT orthogonal time-of-flight mass spectrometer equipped with a Lock Mass probe operating in positive electrospray mode.

Melting points were measured using a Thomas Hoover capillary melting point apparatus.

## Optimization of Metal-Catalyzed THBC Synthesis (1a to 2a)

### General method for catalyst screening

Screening experiments were carried out in carousel equipment for parallel synthesis. All reactions were run in 20 – 30 mg scale (0.1 M concentration of starting material). Analysis aliquots of the reaction mixtures were taken out with the tip of a Pasteur pipette, followed by argon flush of the reaction tube. The samples were evaporated to dryness under reduced pressure prior to RP-HPLC analysis.

### Structures of selected catalysts

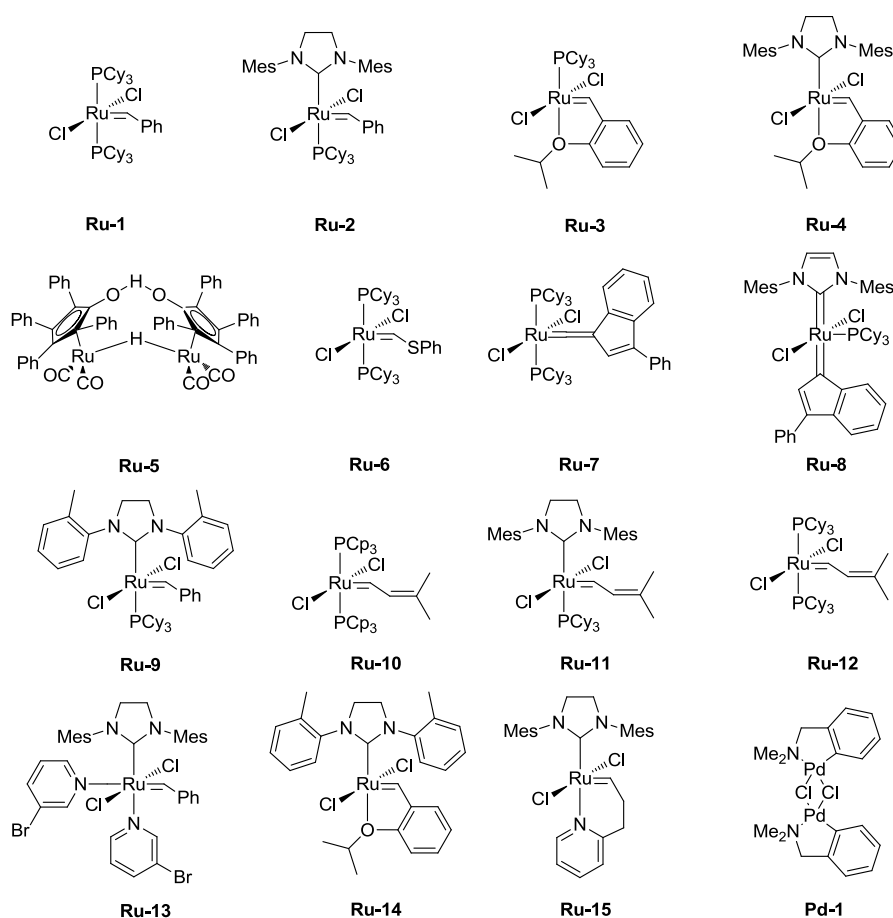



**Table SI-1. Catalyst abbreviations and names**

| <b>Entry</b> | <b>Catalyst abbreviation</b> | <b>Catalyst name (commercial)</b>                                                                                             |
|--------------|------------------------------|-------------------------------------------------------------------------------------------------------------------------------|
| 1            | Ru-1                         | Grubbs catalyst 1 <sup>st</sup> generation                                                                                    |
| 2            | Ru-2                         | Grubbs catalyst 2 <sup>nd</sup> generation                                                                                    |
| 3            | Ru-3                         | Hoveyda-Grubbs catalyst 1 <sup>st</sup> generation                                                                            |
| 4            | Ru-4                         | Hoveyda-Grubbs catalyst 2 <sup>nd</sup> generation                                                                            |
| 5            | Ru-5                         | 1-Hydroxytetraphenylcyclopentadienyl-(tetraphenyl-2,4-cyclopentadien-1-one)-μ-hydrotetracarbonyldiruthenium(II)               |
| 6            | Ru-6                         | Bis(tricyclohexylphosphine)[(phenylthio)methylene]ruthenium (IV) dichloride                                                   |
| 7            | Ru-7                         | Bis(tricyclohexylphosphine)-3-phenyl-1H-inden-1-ylideneruthenium(IV) dichloride                                               |
| 8            | Ru-8                         | Tricyclohexylphosphine[1,3-bis(2,4,6-trimethylphenyl)imidazol-2-ylidene][3-phenyl-1H-inden-1-ylidene]ruthenium(II) dichloride |
| 9            | Ru-9                         | [1,3-Bis(2-methylphenyl)-2-imidazolidinylidene]dichloro(phenylmethylene)(tricyclohexylphosphine)ruthenium(II)                 |
| 10           | Ru-10                        | Dichloro(3-methyl-2-butenylidene)bis(tricyclopentylphosphine)ruthenium(II))                                                   |
| 11           | Ru-11                        | Dichloro[1,3-bis(2,4,6-trimethylphenyl)-2-imidazolidinylidene](3-methyl-2-butenylidene)(tricyclohexylphosphine)ruthenium(II)  |
| 12           | Ru-12                        | Dichloro(3-methyl-2-butenylidene)bis(tricyclohexylphosphine)ruthenium(II)                                                     |
| 13           | Ru-13                        | Dichloro[1,3-bis(2,4,6-trimethylphenyl)-2-imidazolidinylidene](benzylidene)bis(3-bromopyridine)ruthenium(II)                  |
| 14           | Ru-14                        | Dichloro[1,3-bis(2-methylphenyl)-2-imidazolidinylidene](2-isopropoxyphenylmethylene)ruthenium(II)                             |
| 15           | Ru-15                        | Dichloro[1,3-bis(2,4,6-trimethylphenyl)-2-imidazolidinylidene][3-(2-pyridinyl)propylidene]ruthenium(II)                       |
| 16           | Pd-1                         | Di-μ-chlorobis[2-[(dimethylamino)methyl]phenyl-C,N]dipalladium(II)                                                            |
| 17           | (R)-TRIP                     | (R)-(-)-3,3'-Bis(triphenylsilyl)-1,1'-binaphthyl-2,2'-diyl hydrogenphosphate                                                  |

**Table SI-2. Transition metal catalysts for the synthesis of THBC 2a**

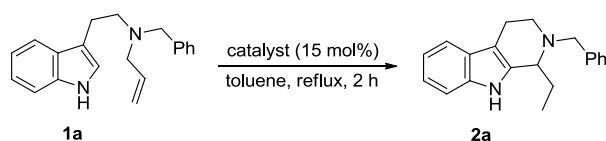

| Entry | Catalyst                                                           | Conversion (%) <sup>a, b</sup> |
|-------|--------------------------------------------------------------------|--------------------------------|
| 1     | None                                                               | 0                              |
| 2     | TFA                                                                | 0 <sup>c</sup>                 |
| 3     | ( <i>R</i> )-TRIP                                                  | 0 <sup>c</sup>                 |
| 4     | [Rh(( <i>S,S</i> )MeBPE)(cod)]BF <sub>4</sub>                      | 100 <sup>d</sup>               |
| 5     | Rh(cod)Cl dimer                                                    | 13                             |
| 6     | Rh(PPh <sub>3</sub> ) <sub>3</sub> Cl                              | 100                            |
| 7     | Rh(acac)(CO) <sub>2</sub>                                          | 42                             |
| 8     | Pd(P( <i>o</i> -tolyl) <sub>3</sub> ) <sub>2</sub> Cl <sub>2</sub> | 0                              |
| 9     | Pd(PPh <sub>3</sub> ) <sub>4</sub>                                 | 100                            |
| 10    | Pd <sub>2</sub> (dba) <sub>3</sub>                                 | 63                             |
| 11    | Pd(PPh <sub>3</sub> ) <sub>2</sub> Cl <sub>2</sub>                 | 0                              |
| 12    | Pd-1                                                               | 0                              |
| 13    | Pd(cod)Cl <sub>2</sub>                                             | 0                              |
| 14    | Pd( <i>Pt</i> -Bu <sub>3</sub> ) <sub>2</sub>                      | 100                            |
| 15    | Pd(PhCN) <sub>2</sub> Cl <sub>2</sub>                              | 0                              |

<sup>a</sup> Determined by RP-HPLC (215 nm); <sup>b</sup> Reaction mixtures were generally clean (>85% of **1a** and **2a** as determined by RP-HPLC); <sup>c</sup> Reaction carried out with 5 mol% of catalyst. <sup>d</sup> The reaction product was analyzed by chiral RP-HPLC and the enantiomeric excess was found to be <1%.

**Table SI-3. Ruthenium catalysts for the synthesis of THBC 2a**

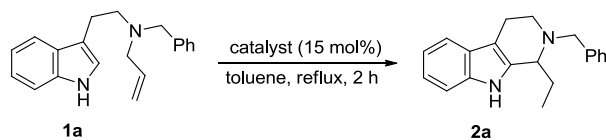

| Entry | Catalyst                 | Conversion (%) <sup>a, b</sup> |
|-------|--------------------------|--------------------------------|
| 1     | Ru-1                     | 78                             |
| 2     | Ru-2                     | 100                            |
| 3     | Ru-2 + ( <i>R</i> )-TRIP | 100 <sup>c</sup>               |
| 4     | Ru-3                     | 100                            |
| 5     | Ru-4                     | 100                            |
| 6     | Ru-5                     | NA <sup>d</sup>                |
| 7     | Ru-6                     | 100                            |
| 8     | Ru-7                     | 100                            |
| 9     | Ru-8                     | 100                            |
| 10    | Ru-9                     | 100                            |
| 11    | Ru-10                    | 100                            |
| 12    | Ru-11                    | 95                             |
| 13    | Ru-12                    | 100                            |
| 14    | Ru-13                    | 100                            |
| 15    | Ru-14                    | 100                            |
| 16    | Ru-15                    | 36                             |

<sup>a</sup> Determined by RP-HPLC (215 nm); <sup>b</sup> Reaction mixtures were generally clean (>85% of **1a** and **2a** as determined by RP-HPLC); <sup>c</sup> The reaction product was analyzed by chiral RP-HPLC and the enantiomeric excess was found to be 17%; <sup>d</sup> Complex reaction mixture.

**Table SI-4. Transition metal catalysts (1 mol%) for the synthesis of THBC 2a**

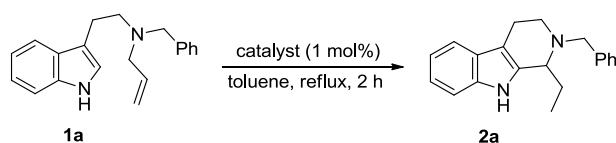

| Entry | Catalyst                                        | Conversion (%) <sup>a, b</sup> |      |
|-------|-------------------------------------------------|--------------------------------|------|
|       |                                                 | 6 h                            | 23 h |
| 1     | [Rh(( <i>S,S</i> )MeBPE)(cod)]BF <sub>4</sub>   | 16                             | 25   |
| 2     | Rh(PPh <sub>3</sub> ) <sub>3</sub> Cl           | 76                             | 100  |
| 3     | Pd(PPh <sub>3</sub> ) <sub>4</sub>              | 58                             | 66   |
| 4     | Pd(P( <i>t</i> -Bu) <sub>3</sub> ) <sub>2</sub> | 5                              | 14   |
| 5     | Ru-2                                            | 95                             | 95   |
| 6     | Ru-2 + ( <i>R</i> )-TRIP                        | 23                             | 25   |
| 7     | Ru-3                                            | 6                              | 10   |
| 8     | Ru-4                                            | 30                             | 47   |
| 9     | Ru-6                                            | 21                             | 40   |
| 10    | Ru-7                                            | 17                             | 26   |
| 11    | Ru-8                                            | 29                             | 47   |
| 12    | Ru-9                                            | 95                             | 100  |
| 13    | Ru-10                                           | 12                             | 19   |
| 14    | Ru-11                                           | 19                             | 42   |
| 15    | Ru-13                                           | 31                             | 55   |
| 16    | Ru-14                                           | 100                            | 100  |

<sup>a</sup> Determined by RP-HPLC (215 nm); <sup>b</sup> Reaction mixtures were generally clean (>85% of **1a** and **2a** as determined by RP-HPLC).

**Table SI-5. Transition metal catalysts (0.1 mol%) for the synthesis of THBC 2a**

Reaction scheme: **1a**  $\xrightarrow[\text{toluene, reflux, 23 h}]{\text{catalyst (0.1 mol\%)}}$  **2a**

| entry | Catalyst                                  | Conversion (%) <sup>a, b</sup> |
|-------|-------------------------------------------|--------------------------------|
| 1     | Rh(PPh <sub>3</sub> ) <sub>3</sub> Cl     | 33                             |
| 2     | RuHCl(CO)(PPh <sub>3</sub> ) <sub>3</sub> | 14                             |
| 3     | Ru-2                                      | 97                             |
| 4     | Ru-9                                      | 42                             |
| 5     | Ru-14                                     | 95                             |

<sup>a</sup> Determined by RP-HPLC (215 nm); <sup>b</sup> Reaction mixtures were generally clean (>85% of **1a** and **2a** as determined by RP-HPLC).

## Synthetic Procedures and Analytical Data for Tryptamine Derivatives (3a-e, 3j and 1a-s)

### *N*-benzyl-allylamine<sup>1</sup>

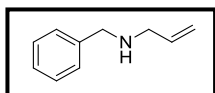

In a round-bottomed flask fitted with a magnetic stirring bar, benzyl bromide (4.99 g, 3.46 mL, 29.2 mmol) was added dropwise to a stirred suspension of K<sub>2</sub>CO<sub>3</sub> (4.83 g, 35.1 mmol) in allyl amine (13.32 g, 17.5 mL, 233 mmol) over 45 min. The reaction was stirred at rt overnight, whereupon the reaction mixture was filtered through a pad of celite, which was washed with CH<sub>2</sub>Cl<sub>2</sub> (2 x 25 mL). The filtrate was then evaporated *in vacuo*, and the crude product was distilled at 3.1 mbar, 75°C (kugelrohr) to give the title compound as a clear oil (2.43 g, 57%). R<sub>f</sub> = 0.26 (EtOAc; UV; KMnO<sub>4</sub>); HPLC purity: 93% (R<sub>t</sub> = 4.01 min); <sup>1</sup>H NMR (300 MHz, DMSO-*d*<sub>6</sub>) δ 7.34 – 7.26 (m, 4H), 7.21 (ddd, *J* = 10.7, 5.2, 2.9 Hz, 1H), 5.93 – 5.78 (m, 1H), 5.15 (ddd, *J* = 17.3, 3.8, 1.7 Hz, 1H), 5.09 – 5.00 (m, 1H), 3.66 (s, 2H), 3.12 (dd, *J* = 5.7, 1.4 Hz, 2H), 2.18 (br. s, 1H); <sup>13</sup>C NMR (75 MHz, DMSO-*d*<sub>6</sub>) δ 140.7, 137.5, 127.9, 127.8, 126.3, 115.0, 52.2, 50.1; MS (ESI) *m/z*: calcd for C<sub>10</sub>H<sub>14</sub>N [M + H]<sup>+</sup> 148.1, found 148.1.

### *N*-Benzyltryptamine (3a)<sup>2</sup>

#### *General procedure (I): Reductive alkylation of tryptamine*

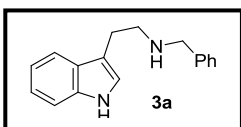

In a round-bottomed flask fitted with a magnetic stirring bar, tryptamine (2.50 g, 15.6 mmol) and benzaldehyde (1.66 g, 1.59 mL, 15.6 mmol) were dissolved in MeOH (63 mL). The reaction mixture was added molecular sieves (3 Å) and stirred at rt. The reaction was monitored by TLC, and upon full conversion of benzaldehyde (24 h), solid NaBH<sub>4</sub> (590 mg, 15.6 mmol) was added. After further 16 h of stirring, the reaction mixture was filtered through a pad of celite, which was washed with MeOH (2 x 50 mL). The filtrate was evaporated *in vacuo*. The residue was taken up in sat. NaHCO<sub>3</sub> (50 mL), H<sub>2</sub>O (50 mL) and EtOAc (100 mL) and transferred to a separatory funnel. The organic layer was separated and washed with H<sub>2</sub>O (50 mL) and brine (50 mL). The organic layer was dried over Na<sub>2</sub>SO<sub>4</sub> and evaporated *in vacuo* to give the title compound as a brown oil (3.89g, >95%). The compound was used in the next step without further purification. R<sub>f</sub> = 0.25 (EtOAc; UV; KMnO<sub>4</sub>); HPLC purity: > 95% (R<sub>t</sub> = 5.77min); <sup>1</sup>H NMR (300 MHz, DMSO-*d*<sub>6</sub>) δ 10.79 (s, 1H), 7.49 (d, *J* = 7.8 Hz, 1H), 7.37 – 7.25 (m, 5H), 7.24 – 7.16 (m, 1H), 7.12 (d, *J* = 2.3 Hz, 1H), 7.09 – 7.01 (m, 1H), 6.99 – 6.90 (m, 1H), 3.87 (s, 2H), 2.91 – 2.74 (m, 4H); <sup>13</sup>C NMR (75 MHz, DMSO-*d*<sub>6</sub>) δ 140.8, 136.2, 128.0, 127.9, 127.2, 126.4, 122.5, 120.8, 118.2, 118.0, 112.5, 111.3, 52.8, 49.5, 25.4; MS (ESI) *m/z*: calcd for C<sub>17</sub>H<sub>19</sub>N<sub>2</sub> [M + H]<sup>+</sup> 251.2, found 251.3.

<sup>1</sup> Mukharjee, S.; List, B. *J. Am. Chem. Soc.* **2007**, *129*, 11336-11337

<sup>2</sup> David, B.; Martin, C.; Vanderwal, C. D. *J. Am. Chem. Soc.* **2009**, *131*, 3472-3473

### *N*-(4-Nitro)benzyltryptamine (3b)

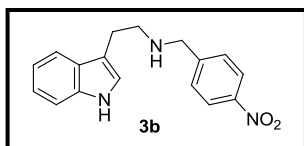

Following **general procedure (I)**, the reaction of tryptamine (300 mg, 1.87 mmol), 4-nitrobenzaldehyde (283 mg, 1.87 mmol) and NaBH<sub>4</sub> (71 mg, 1.87 mmol) gave, after aqueous work-up, the title compound as brown amorphous solid (525 mg, 95%). The compound was used in the next step without further purification; HPLC purity: > 95% (*R*<sub>t</sub> = 5.86 min); IR (neat) cm<sup>-1</sup>: 3404, 3052, 2920, 2850, 1559, 1507, 1452, 1100; <sup>1</sup>H NMR (300 MHz, DMSO-*d*<sub>6</sub>) δ 10.80 (s, 1H), 8.20 – 8.09 (m, 2H), 7.58 (d, *J* = 5.6 Hz, 2H), 7.49 (d, *J* = 7.6 Hz, 1H), 7.33 (d, *J* = 8.0 Hz, 1H), 7.13 (d, *J* = 2.3 Hz, 1H), 3.86 (s, 2H), 2.91 – 2.83 (m, 2H), 2.83 – 2.75 (m, 2H); <sup>13</sup>C NMR (75 MHz, DMSO-*d*<sub>6</sub>) δ 149.6, 146.1, 136.2, 128.7, 127.2, 123.1, 122.5, 120.8, 118.2, 118.0, 112.4, 111.3, 52.0, 49.5, 25.5; MS (ESI) *m/z*: calcd for C<sub>17</sub>H<sub>18</sub>N<sub>3</sub>O<sub>2</sub> [*M* + *H*]<sup>+</sup> 296.1, found 296.3.

### *N*-(3,4-Dimethoxy)benzyltryptamine (3c)

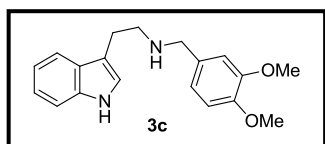

Following **general procedure (I)**, the reaction of tryptamine (300 mg, 1.87 mmol), 3,4-dimethoxybenzaldehyde (311 mg, 1.87 mmol) and NaBH<sub>4</sub> (71 mg, 1.87 mmol) gave, after aqueous work-up, the title compound as a brown oil (550 mg, 95%). The compound was used in the next step without further purification. *R*<sub>f</sub> = 0.32 (MeOH:CH<sub>2</sub>Cl (1:3); UV; KMnO<sub>4</sub>); HPLC purity: > 95% (*R*<sub>t</sub> = 5.61 min); IR (neat) cm<sup>-1</sup>: 3368, 2913, 2833, 1607, 1513, 1259, 1231, 1137, 1024; <sup>1</sup>H NMR (300 MHz, DMSO-*d*<sub>6</sub>) δ 10.79 (s, 1H), 7.49 (d, *J* = 7.7 Hz, 1H), 7.32 (d, *J* = 8.1 Hz, 1H), 7.13 (d, *J* = 2.2 Hz, 1H), 7.05 (t, *J* = 7.0 Hz, 1H), 6.95 (t, *J* = 7.1 Hz, 2H), 6.88 – 6.79 (m, 2H), 3.71 (s, 6H), 3.70 (s, 2H), 3.35 (br. s, 1H), 2.93 – 2.64 (m, 4H); <sup>13</sup>C NMR (75 MHz, DMSO-*d*<sub>6</sub>) δ 148.5, 147.5, 136.2, 132.9, 127.2, 122.5, 120.8, 119.9, 118.3, 118.1, 112.4, 111.7, 111.4, 111.3, 55.4, 55.2, 52.4, 49.3, 25.2; HRMS (ESI) *m/z*: calcd for C<sub>19</sub>H<sub>23</sub>N<sub>2</sub>O<sub>2</sub> [*M* + *H*]<sup>+</sup> 311.1760, found 311.1755.

### *N*-Cyclohexylmethyltryptamine (3d)

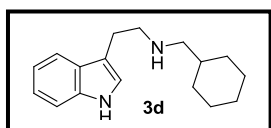

Following **general procedure (I)**, the reaction of tryptamine (300 mg, 1.87 mmol), cyclohexanecarbaldehyde (210 mg, 227 μL, 1.87 mmol) and NaBH<sub>4</sub> (71 mg, 1.87 mmol) gave, after aqueous work-up, the title compound as a yellow oil (471 mg, >95%). The compound was used in the next step without further purification. *R*<sub>f</sub> = 0.22 (MeOH:CH<sub>2</sub>Cl<sub>2</sub> (1:1); UV; KMnO<sub>4</sub>); HPLC purity: > 95% (*R*<sub>t</sub> = 6.30 min); IR (neat) cm<sup>-1</sup>: 3410, 3326, 3050, 2915, 2839, 1619, 1447, 1355, 1341, 1192; <sup>1</sup>H NMR (300 MHz, DMSO-*d*<sub>6</sub>) δ 10.78 (s, 1H), 7.50 (d, *J* = 7.7 Hz, 1H), 7.32 (d, *J* = 8.0 Hz, 1H), 7.12 (d, *J* = 2.2 Hz, 1H), 7.05 (t, *J* = 7.5 Hz, 1H), 6.96 (t, *J* = 7.4 Hz, 1H), 2.85 – 2.71 (m, 4H), 2.37 (d, *J* = 6.6 Hz, 2H), 1.75 – 1.56 (m, 5H), 1.41 – 1.27 (m, 1H), 1.26 – 1.01 (m, 3H), 0.89 – 0.78 (m, 2H); <sup>13</sup>C NMR (75 MHz, DMSO-*d*<sub>6</sub>) δ 136.2, 127.2, 122.4, 120.7, 118.2, 118.0, 112.6, 111.2, 56.2, 50.5, 37.6, 31.1, 26.3, 25.6, 25.5; HRMS (ESI) *m/z*: calcd for C<sub>17</sub>H<sub>25</sub>N<sub>2</sub> [*M* + *H*]<sup>+</sup> 257.2018, found 257.2013.

### N-Heptyltryptamine (3e)

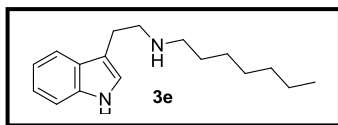

Following **general procedure (I)**, the reaction of tryptamine (300 mg, 1.87 mmol), heptanal (214 mg, 261  $\mu$ L, 1.87 mmol) and  $\text{NaBH}_4$  (71 mg, 1.87 mmol) gave, after aqueous, work-up the title compound as a brown oil (449 mg, 93%). The compound was used in the next step without further purification.  $R_f$  = 0.18 (MeOH: $\text{CH}_2\text{Cl}_2$  (1:1); UV;  $\text{KMnO}_4$ ); HPLC purity: 93% ( $R_t$  = 6.71 min); IR (neat)  $\text{cm}^{-1}$ : 3413, 2923, 2853, 1454, 1353, 1107;  $^1\text{H}$  NMR (300 MHz,  $\text{DMSO}-d_6$ )  $\delta$  10.73 (s, 1H), 7.46 (d,  $J$  = 7.8 Hz, 1H), 7.28 (d,  $J$  = 8.0 Hz, 1H), 7.08 (d,  $J$  = 2.2 Hz, 1H), 7.07 (dt,  $J$  = 7.5, 1.2 Hz, 1H), 6.96 – 6.88 (m, 1H), 2.85 – 2.62 (m, 4H), 2.48 – 2.4 (m, 2H), 1.45 – 1.03 (m, 10H), 0.81 (t,  $J$  = 6.6 Hz, 3H);  $^{13}\text{C}$  NMR (75 MHz,  $\text{DMSO}-d_6$ )  $\delta$  136.2, 127.2, 122.4, 120.7, 118.2, 118.0, 112.6, 111.3, 50.2, 49.3, 31.3, 29.6, 28.7, 26.8, 25.5, 22.1, 13.9; HRMS (ESI)  $m/z$ : calcd for  $\text{C}_{17}\text{H}_{27}\text{N}_2$  [ $\text{M} + \text{H}$ ] $^+$  259.2174, found 259.2169.

### N-Allyltryptamine<sup>3</sup>

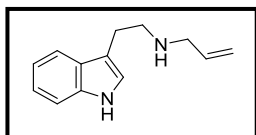

In a round-bottomed flask fitted with a magnetic stirring bar, 3-(2-bromoethyl)indole (1.00 g, 4.46 mmol) was added in portions to a stirred suspension of  $\text{K}_2\text{CO}_3$  (740 mg, 5.35 mmol) in allylamine (7.96 g, 10.4 mL, 89.2 mmol) over 30 min. The reaction was stirred at rt overnight, whereupon the reaction mixture was filtered through a pad of celite, which was washed with  $\text{CH}_2\text{Cl}_2$  (2 x 25 mL). The filtrate was then evaporated *in vacuo*, and the residue was then purified by flash column chromatography on silica gel ( $\text{Et}_3\text{N}:\text{MeOH}:\text{CH}_2\text{Cl}_2$ ; 1:10:89), to give the title compound as a brown oil (876 mg, >95%).  $R_f$  = 0.26 (MeOH: $\text{CH}_2\text{Cl}_2$  (1:9); UV;  $\text{KMnO}_4$ ); HPLC purity: >95% ( $R_t$  = 4.90 min);  $^1\text{H}$  NMR (300 MHz,  $\text{CDCl}_3$ )  $\delta$  8.11 (s, 1H), 7.63 (dd,  $J$  = 7.8, 0.7 Hz, 1H), 7.37 (dt,  $J$  = 8.1, 0.9 Hz, 1H), 7.20 (ddd,  $J$  = 8.2, 7.1, 1.3 Hz, 1H), 7.15 – 7.09 (m, 1H), 7.05 (d,  $J$  = 2.3 Hz, 1H), 5.89 (ddt,  $J$  = 17.2, 10.2, 6.0 Hz, 1H), 5.14 (ddd,  $J$  = 17.1, 3.3, 1.6 Hz, 1H), 5.06 (ddd,  $J$  = 10.2, 3.0, 1.3 Hz, 1H), 3.27 (dt,  $J$  = 6.0, 1.4 Hz, 2H), 3.01 – 2.92 (m, 4H), 1.64 (br. s, 1H);  $^{13}\text{C}$  NMR (75 MHz,  $\text{CDCl}_3$ )  $\delta$  137.1, 136.7, 127.7, 122.4, 122.3, 119.5, 119.2, 116.2, 114.2, 111.5, 52.7, 49.7, 26.1; MS (ESI)  $m/z$ : calcd for  $\text{C}_{13}\text{H}_{17}\text{N}_2$  [ $\text{M} + \text{H}$ ] $^+$  201.1, found 201.3.

### N-Phenyltryptamine

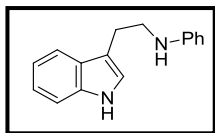

In a round-bottomed flask fitted with a magnetic stirring bar, 3-(2-bromoethyl)indole (500 mg, 2.23 mmol) was added in portions over 30 min to a stirred suspension of  $\text{K}_2\text{CO}_3$  (370 mg, 2.68 mmol) in aniline (4.16 g, 4.01 mL, 44.6 mmol). The reaction was stirred at rt, whereupon the reaction mixture was filtered through a pad of celite, which was washed with  $\text{CH}_2\text{Cl}_2$  (2 x 10 mL). The  $\text{CH}_2\text{Cl}_2$  was removed *in vacuo*. Excess of aniline was removed by distillation (73  $^\circ\text{C}$ , 16 mbar), and the residue was then purified by flash column chromatography on silica gel ( $\text{Et}_3\text{N}:\text{EtOAc}:\text{heptane}$ ; 1:35:64), to give the title compound as a brown solid (515 mg, >95%). m.p.: 83 – 86  $^\circ\text{C}$ ;  $R_f$  = 0.39 (EtOAc:heptane (35:65); UV;  $\text{KMnO}_4$ ); HPLC purity: >95% ( $R_t$  = 5.75 min);  $^1\text{H}$  NMR (300 MHz,  $\text{CDCl}_3$ )  $\delta$  7.99 (s, 1H), 7.64 (ddt,  $J$  = 7.7, 1.4, 0.8 Hz, 1H), 7.39 (dt,  $J$  = 8.1, 1.0 Hz, 1H), 7.28 – 7.11 (m, 3H), 7.05 (d,  $J$  = 2.4 Hz, 1H), 6.83 – 6.68 (m, 2H), 6.67 – 6.58 (m, 2H), 3.72 (br. s, 1H), 3.49 (t,  $J$  = 6.8 Hz, 2H), 3.11 (t,  $J$  = 6.7 Hz, 2H);  $^{13}\text{C}$  NMR (75 MHz,  $\text{CDCl}_3$ )  $\delta$  148.5, 136.6, 129.6, 127.7, 122.4, 122.4,

<sup>3</sup> Ascic. E.; Jensen. J. F.; Nielsen. T. E. *Angew. Chem. Int. Ed.* **2011**, 50, 5188-5191.



119.7, 119.04 117.6, 115.4, 113.3, 111.5, 44.2, 25.3; MS (ESI)  $m/z$ : calcd for  $C_{16}H_{17}N_2$   $[M + H]^+$  237.1, found 237.4.

### ***N*-Benzyl-(5-methoxy)tryptamine**

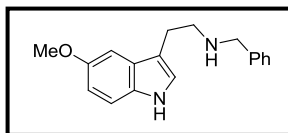

Following **general procedure (I)**, the reaction of (5-methoxy)tryptamine (120 mg, 0.63 mmol), benzaldehyde (67 mg, 64  $\mu$ L, 0.63 mmol) and  $NaBH_4$  (24 mg, 0.63 mmol) gave, after aqueous work-up, the title compound as a yellow oil (128 mg, 73%). The compound was used in the next step without further purification.

$^1H$  NMR (300 MHz,  $CDCl_3$ )  $\delta$  7.85 (s, 1H), 7.16 – 7.14 (m,  $J$  = 5.9, 4.4 Hz, 6H), 6.95 (dd,  $J$  = 9.2, 2.3 Hz, 2H), 6.78 (dd,  $J$  = 8.8, 2.4 Hz, 1H), 3.77 (s, 3H), 3.76 (s, 2H), 2.92 (s, 4H), 2.05 (br. s, 1H).

### ***N*-Benzyl-(6-methoxy)tryptamine (3j)**

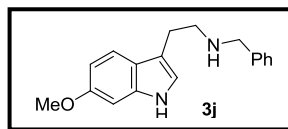

Following general **procedure (I)**, the reaction of (6-methoxy)tryptamine (100 mg, 0.53 mmol), benzaldehyde (56 mg, 54  $\mu$ L, 0.53 mmol) and  $NaBH_4$  (20 mg, 0.53 mmol) gave, after aqueous work-up, the title compound as a brown oil (143 mg, >95%). The compound was used in the next step without further purification.

$^1H$  NMR (300 MHz,  $CDCl_3$ )  $\delta$  7.86 (s, 1H), 7.39 (d,  $J$  = 8.4 Hz, 1H), 7.24 – 7.16 (m, 5H), 6.82 (d,  $J$  = 2.2 Hz, 1H), 6.76 (d,  $J$  = 2.0 Hz, 1H), 6.71 (dd,  $J$  = 8.6, 2.3 Hz, 1H), 3.76 (s, 3H), 3.74 (s, 2H), 2.90 (s, 4H), 1.74 (br. s, 1H).

### ***N*-Benzyl-(7-methyl)tryptamine**

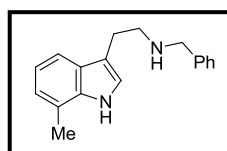

Following **general procedure (I)**, the reaction of (7-methyl)tryptamine (100 mg, 0.57 mmol), benzaldehyde (61 mg, 58  $\mu$ L, 0.57 mmol) and  $NaBH_4$  (22 mg, 0.57 mmol) gave, after aqueous work-up, the title compound as a brown oil (112 mg, 74%). The compound was used in the next step without further purification.

$^1H$  NMR (300 MHz,  $CDCl_3$ )  $\delta$  7.87 (s, 1H), 7.39 (d,  $J$  = 7.4 Hz, 1H), 7.27 – 7.11 (m, 5H), 6.99 – 6.91 (m, 3H), 3.74 (s, 2H), 2.95 – 2.88 (m, 4H), 2.39 (s, 3H), 1.76 (br. s, 1H).

### ***N*-Benzyl-(5-methyl)tryptamine**

#### ***General procedure (II): Reductive alkylation of tryptamine HCl salts***

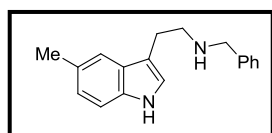

In a round-bottomed flask fitted with a magnetic stirring bar,  $Et_3N$  (96 mg, 132  $\mu$ L, 0.95 mmol) was added to a stirred suspension of (5-methyl)tryptamine (hydrochloride salt) (200 mg, 0.95 mmol) in MeOH (4 mL). After 5 min, the reaction mixture was added benzaldehyde (101 mg, 97  $\mu$ L, 0.95 mmol) and

molecular sieves (3 $\text{\AA}$ ), and stirred at rt. The reaction was monitored by TLC, and upon full conversion of benzaldehyde (24 h), solid  $NaBH_4$  (36 mg, 0.95 mmol) was added. After further 16 h of stirring, the reaction mixture was filtered through a pad of celite, which was washed with MeOH (2 x 15 mL). The filtrate was

evaporated *in vacuo*. The residue was taken up in sat.  $\text{NaHCO}_3$  (25 mL),  $\text{H}_2\text{O}$  (25 mL) and EtOAc (50 mL) and transferred to a separatory funnel. The organic layer was separated and washed with  $\text{H}_2\text{O}$  (25 mL) and brine (25 mL). The organic layer was dried over  $\text{Na}_2\text{SO}_4$  and evaporated *in vacuo* to give the title compound as a brown oil (236 mg, 94%). The compound was used in the next step without further purification.  $^1\text{H}$  NMR (300 MHz,  $\text{CDCl}_3$ )  $\delta$  7.98 (s, 1H), 7.36 – 7.06 (m, 6H), 6.96 – 6.91 (dd,  $J$  = 8.4, 1.5 Hz, 1H), 6.87 (d,  $J$  = 2.1 Hz, 1H), 3.74 (s, 2H), 2.91 (s, 4H), 2.37 (s, 3H), 2.03 (br. s, 1H).

### ***N*-Benzyl-(5-fluoro)tryptamine**

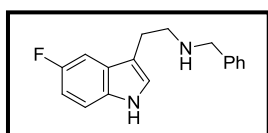

Following **general procedure (II)**, the reaction of (5-fluoro)tryptamine hydrochloride (200 mg, 0.93 mmol),  $\text{Et}_3\text{N}$  (94 mg, 130  $\mu\text{L}$ , 0.93 mmol), benzaldehyde (99 mg, 95  $\mu\text{L}$ , 0.93 mmol) and  $\text{NaBH}_4$  (35 mg, 0.93 mmol) gave after aqueous work-up the title compound as a brown oil (231 mg, 92%). The compound was used in the next step without further purification.  $^1\text{H}$  NMR (300 MHz,  $\text{CDCl}_3$ )  $\delta$  8.00 (s, 1H), 7.28 – 7.08 (m, 7H), 6.98 (d,  $J$  = 2.1 Hz, 1H), 6.86 (td,  $J$  = 9.1, 2.4 Hz, 1H), 3.75 (s, 2H), 2.92 – 2.83 (m, 4H), 1.78 (s, 1H).

### ***N*-Benzyl-(5-bromo)tryptamine**

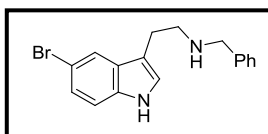

Following **general procedure (II)**, the reaction of (5-bromo)tryptamine hydrochloride (250 mg, 0.91 mmol),  $\text{Et}_3\text{N}$  (92 mg, 126  $\mu\text{L}$ , 0.91 mmol), benzaldehyde (96 mg, 92  $\mu\text{L}$ , 0.91 mmol) and  $\text{NaBH}_4$  (34 mg, 0.91 mmol) gave after aqueous work-up the title compound as a brown oil (282 mg, 95%). The compound was used in the next step without further purification.  $^1\text{H}$  NMR (300 MHz,  $\text{CDCl}_3$ )  $\delta$  8.36 (s, 1H), 7.60 (d,  $J$  = 1.6 Hz, 1H), 7.24 – 7.08 (m, 7H), 6.91 (s, 1H), 4.19 (br. s, 1H), 3.77 (s, 2H), 2.93 – 2.82 (m, 4H).

### ***N*-3-Phenylprop-2-en-1-tryptamine**

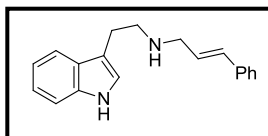

Following **general procedure (I)**, the reaction of tryptamine (300 mg, 1.87 mmol), cinnamaldehyde (247 mg, 236  $\mu\text{L}$ , 1.87 mmol) and  $\text{NaBH}_4$  (142 mg, 3.75 mmol) gave, after aqueous work-up, the title compound as a brown oil (439 mg, 85%). The compound was used in the next step without further purification.  $R_f$  = 0.41 ( $\text{MeOH}:\text{CH}_2\text{Cl}_2$  (1:3); UV;  $\text{KMnO}_4$ ); HPLC purity: > 95% ( $R_t$  = 6.41 min); IR (neat)  $\text{cm}^{-1}$ : 3412, 2915, 2838, 1448, 1353, 1229, 966, 736;  $^1\text{H}$  NMR (300 MHz,  $\text{DMSO}-d_6$ )  $\delta$  10.79 (s, 1H), 7.52 (d,  $J$  = 7.8 Hz, 1H), 7.44 – 7.24 (m, 5H), 7.20 (t,  $J$  = 6.8 Hz, 1H), 7.14 (d,  $J$  = 2.0 Hz, 1H), 7.05 (t,  $J$  = 7.5 Hz, 1H), 6.95 (t,  $J$  = 7.4 Hz, 1H), 6.50 (d,  $J$  = 16.0 Hz, 1H), 6.31 (dt,  $J$  = 15.9, 5.9 Hz, 1H), 3.35 (d,  $J$  = 5.9 Hz, 2H), 2.84 (s, 4H);  $^{13}\text{C}$  NMR (75 MHz,  $\text{DMSO}-d_6$ )  $\delta$  136.9, 136.2, 129.7, 129.5, 128.5, 127.2, 127.1, 126.0, 122.5, 120.8, 118.3, 118.1, 112.6, 111.3, 51.0, 49.6, 25.5; HRMS (ESI)  $m/z$ : calcd for  $\text{C}_{19}\text{H}_{21}\text{N}_2$  [ $\text{M} + \text{H}$ ] $^+$  277.1705, found 277.1702.

### N-3-(4-Nitrophenyl)prop-2-en-1-tryptamine

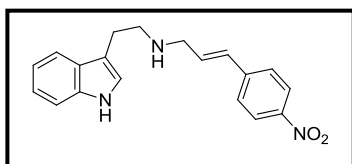

Following **general procedure (I)**, the reaction of tryptamine (600 mg, 3.75 mmol), *trans*-4-nitrocinnamaldehyde (664 mg, 3.75 mmol) and NaBH<sub>4</sub> (284 mg, 7.50 mmol) gave after aqueous work-up the title compound as a yellow powder (1.17 g, >95%). The compound was used in the next step without further purification. m.p.: 83 – 86 °C; R<sub>f</sub> = 0.37 (EtOAc; UV; KMnO<sub>4</sub>); HPLC purity: > 95% (R<sub>t</sub> = 6.40 min); IR (neat) cm<sup>-1</sup>: 3412, 2914, 2839, 1594, 1507, 1454, 1336, 1105; <sup>1</sup>H NMR (300 MHz, DMSO-*d*<sub>6</sub>) δ 10.79 (s, 1H), 8.19 – 8.13 (m, 2H), 7.70 – 7.60 (m, 2H), 7.52 (d, *J* = 7.7 Hz, 1H), 7.33 (d, *J* = 8.0 Hz, 1H), 7.15 (d, *J* = 2.3 Hz, 1H), 7.09 – 7.02 (dt, *J* = 8.1, 0.9, 1H), 6.99 – 6.91 (m, 1H), 3.41 (d, *J* = 4.0 Hz, 2H), 2.85 (s, 4H); <sup>13</sup>C NMR (75 MHz, DMSO-*d*<sub>6</sub>) δ 145.9, 143.8, 136.2, 135.3, 127.7, 127.2, 126.8, 123.8, 122.5, 120.8, 118.3, 118.1, 112.5, 111.3, 50.8, 49.6, 25.5; HRMS (ESI) *m/z*: calcd for C<sub>19</sub>H<sub>20</sub>N<sub>3</sub>O<sub>2</sub> [M + H]<sup>+</sup> 322.1556, found 322.1550.

### N-3-(4-Methoxyphenyl)prop-2-en-1-tryptamine

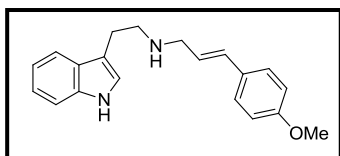

Following **general procedure (I)**, the reaction of tryptamine (600 mg, 3.75 mmol), *trans*-4-methoxycinnamaldehyde (608 mg, 3.75 mmol) and NaBH<sub>4</sub> (284 mg, 7.50 mmol) gave, after aqueous work-up, the title compound as a brown oil (1.10 g, >95%). The compound was used in the next step without further purification. R<sub>f</sub> = 0.45 (MeOH:CH<sub>2</sub>Cl<sub>2</sub> (1:3); UV; KMnO<sub>4</sub>); HPLC purity: > 95% (R<sub>t</sub> = 6.45 min); IR (neat) cm<sup>-1</sup>: 3411, 2923, 2832, 1607, 1151, 1449, 1245, 1149, 1035; <sup>1</sup>H NMR (300 MHz, DMSO-*d*<sub>6</sub>) δ 10.80 (s, 1H), 7.52 (d, *J* = 7.5 Hz, 1H), 7.35 – 7.29 (m, 3H), 7.14 (d, *J* = 2.3 Hz, 1H), 7.05 (dt, *J* = 25, 1.2 Hz, 1H), 6.99 – 6.92 (m, 1H), 6.90 – 6.84 (m, 2H), 6.43 (d, *J* = 16.0 Hz, 1H), 6.15 (dt, *J* = 16.0, 6.1 Hz, 1H), 3.73 (s, 3H), 3.29 (dd, *J* = 23.7, 5.6 Hz, 2H), 2.84 (s, 4H); <sup>13</sup>C NMR (75 MHz, DMSO-*d*<sub>6</sub>) δ 158.4, 136.2, 129.5, 129.4, 127.2, 127.1, 126.9, 122.5, 120.7, 118.3, 118.0, 113.9, 112.5, 111.3, 55.0, 51.0, 49.5, 25.4; HRMS (ESI) *m/z*: calcd for C<sub>20</sub>H<sub>23</sub>N<sub>2</sub>O [M + H]<sup>+</sup> 307.1810, found 307.1804.

### N-Allyl-N- benzyltryptamine (1a)

#### General procedure (III): Alkylation of secondary amines

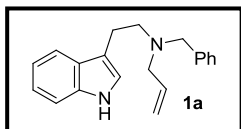

In a round-bottomed flask fitted with a magnetic stirring bar, allyl bromide (1.55 g, 11.1 mL, 12.8 mmol) was added to a stirred suspension of *N*-benzyltryptamine (1.6 g, 6.4 mmol) and K<sub>2</sub>CO<sub>3</sub> (2.85 g, 19.8 mmol) in DMF (20 mL). The reaction was stirred at rt, and was monitored by TLC. Upon full conversion of the starting material (30 min), the reaction mixture was evaporated *in vacuo*. The residue was taken up in CH<sub>2</sub>Cl<sub>2</sub> (100 mL) and water (80 mL) and transferred to a separatory funnel. The organic layer was separated and the aqueous phase was further extracted with CH<sub>2</sub>Cl<sub>2</sub> (1 x 100 mL). The combined organic layers were dried over Na<sub>2</sub>SO<sub>4</sub> and evaporated *in vacuo*. The residue was purified by flash column chromatography on silica gel (Et<sub>3</sub>N:MeOH:CH<sub>2</sub>Cl<sub>2</sub>; 1:2:97), to give the title compound as a brown/yellow oil (1.76 g, 94%). R<sub>f</sub> = 0.38 (EtOAc:heptane (1:1); UV; KMnO<sub>4</sub>); HPLC purity: > 95% (R<sub>t</sub> = 6.28 min); IR (neat) cm<sup>-1</sup>: 3417, 3058, 2972, 2801, 1454, 735; <sup>1</sup>H NMR (300 MHz, DMSO-*d*<sub>6</sub>) δ 10.75 (s, 1H), 7.41 – 7.18 (m, 7H), 7.10 – 6.98 (m, 2H), 6.95 – 6.85 (m, 1H), 5.91 (ddt, *J* = 16.4, 10.2, 6.3 Hz, 1H), 5.24 (dd, *J* = 17.2, 2.0 Hz, 1H), 5.15 (dd, *J* =

10.2, 2.1 Hz, 1H), 3.66 (s, 2H), 3.16 (d,  $J = 6.3$  Hz, 2H), 2.85 (dd,  $J = 9.8, 5.8$  Hz, 2H), 2.68 (dd,  $J = 9.7, 5.7$  Hz, 2H);  $^{13}\text{C}$  NMR (75 MHz, DMSO- $d_6$ )  $\delta$  139.5, 136.1, 136.0, 128.5, 128.0, 127.1, 126.7, 122.3, 120.7, 118.1, 118.0, 117.1, 112.4, 111.2, 57.3, 56.1, 53.6, 22.3; HRMS (ESI)  $m/z$ : calcd for  $\text{C}_{20}\text{H}_{23}\text{N}_2$   $[\text{M} + \text{H}]^+$  291.1861, found 291.1855.

#### *N*-Allyl-*N*-(4-nitro)benzyltryptamine (1b)

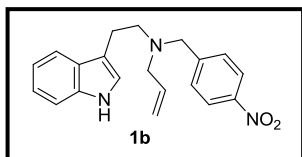

Following **general procedure (III)**, the reaction of *N*-(4-nitro)benzyltryptamine (370 mg, 1.25 mmol), allyl bromide (303 mg, 217  $\mu\text{L}$ , 2.50 mmol) and  $\text{K}_2\text{CO}_3$  (519 mg, 3.75 mmol) gave after purification by flash column chromatography on silica gel ( $\text{Et}_3\text{N}:\text{MeOH}:\text{CH}_2\text{Cl}_2$ ; 1:2:97), the title compound as a yellow oil (409 mg, >95%).  $R_f = 0.19$  (EtOAc:heptane (1:3); UV;  $\text{KMnO}_4$ ); HPLC purity: >95% ( $R_t = 6.31$  min); IR (neat)  $\text{cm}^{-1}$ : 3415, 2920, 2808, 1559, 1513, 1340;  $^1\text{H}$  NMR (300 MHz, DMSO- $d_6$ )  $\delta$  10.77 (s, 1H), 8.17 – 8.09 (m, 2H), 7.57 (d,  $J = 8.7$  Hz, 2H), 7.36 (d,  $J = 7.9$  Hz, 1H), 7.31 (d,  $J = 8.1$  Hz, 1H), 7.08 (d,  $J = 2.3$  Hz, 1H), 7.03 (dt,  $J = 1.2, 6.9$  Hz, 1H), 6.94 – 6.85 (m, 1H), 5.91 (ddt,  $J = 16.5, 10.2, 6.3$  Hz, 1H), 5.25 (dd,  $J = 17.2, 1.9$  Hz, 1H), 5.16 (dd,  $J = 10.2, 2.0$  Hz, 1H), 3.77 (s, 2H), 3.19 (d,  $J = 6.3$  Hz, 2H), 2.91 – 2.78 (m, 2H), 2.80 – 2.56 (m, 2H);  $^{13}\text{C}$  NMR (75 MHz, DMSO- $d_6$ )  $\delta$  148.4, 146.3, 136.1, 135.7, 129.3, 127.1, 123.2, 122.5, 120.7, 118.1, 118.0, 117.5, 112.3, 111.3, 56.6, 56.3, 53.9, 22.5; HRMS (ESI)  $m/z$ : calcd for  $\text{C}_{20}\text{H}_{22}\text{N}_3\text{O}_2$   $[\text{M} + \text{H}]^+$  336.1712, found 336.1707.

#### *N*-Allyl-*N*-(3,4-dimethoxy)benzyltryptamine (1c)

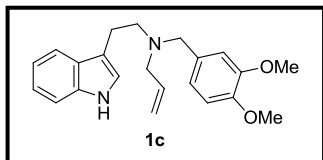

Following **general procedure (III)**, the reaction of *N*-(3,4-dimethoxy)benzyltryptamine (400 mg, 1.29 mmol), allyl bromide (312 mg, 223  $\mu\text{L}$ , 2.58 mmol) and  $\text{K}_2\text{CO}_3$  (534 mg, 3.87 mmol) gave after purification by flash column chromatography on silica gel ( $\text{Et}_3\text{N}:\text{MeOH}:\text{CH}_2\text{Cl}_2$ ; 1:2:97), the title compound as a brown oil (434 mg, >95%).  $R_f = 0.20$  (EtOAc:heptane (1:3); UV;  $\text{KMnO}_4$ ); HPLC purity: 86% ( $R_t = 6.04$  min); IR (neat)  $\text{cm}^{-1}$ : 3372, 2932, 2833, 1591, 1511, 1455, 1259, 1228, 1146, 1025;  $^1\text{H}$  NMR (300 MHz, DMSO- $d_6$ )  $\delta$  10.76 (s, 1H), 7.38 (d,  $J = 7.7$  Hz, 1H), 7.30 (d,  $J = 8.1$  Hz, 1H), 7.12 – 7.00 (m, 2H), 6.96 – 6.79 (dt,  $J = 11.8, 8.1$  Hz, 4H), 5.99 – 5.84 (m, 1H), 5.24 (d,  $J = 17.2$  Hz, 1H), 5.15 (d,  $J = 10.1$  Hz, 1H), 3.79 – 3.71 (s, 3H), 3.67 (s, 3H), 3.58 (s, 2H), 3.16 (d,  $J = 5.9$  Hz, 2H), 2.92 – 2.78 (m, 2H), 2.74 – 2.64 (m, 2H);  $^{13}\text{C}$  NMR (75 MHz, DMSO- $d_6$ )  $\delta$  148.5, 147.6, 136.2, 136.1, 131.8, 127.2, 122.4, 120.7, 120.5, 118.2, 118.0, 117.1, 112.5, 112.0, 111.3, 111.2, 57.0, 56.0, 55.4, 55.21, 53.4, 22.3; HRMS (ESI)  $m/z$ : calcd for  $\text{C}_{22}\text{H}_{27}\text{N}_2\text{O}_2$   $[\text{M} + \text{H}]^+$  351.2073, found 351.2067.

#### *N*-Allyl-*N*-cyclohexylmethyltryptamine (1d)

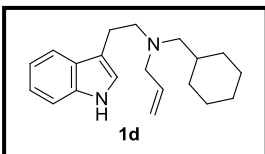

Following **general procedure (III)**, the reaction of *N*-cyclohexylmethyltryptamine (330 mg, 1.17 mmol), allyl bromide (283 mg, 202  $\mu\text{L}$ , 2.34 mmol) and  $\text{K}_2\text{CO}_3$  (485 mg, 3.57 mmol) gave after purification by flash column chromatography on silica gel ( $\text{Et}_3\text{N}:\text{MeOH}:\text{CH}_2\text{Cl}_2$ ; 1:2:97), the title compound as a brown oil (282 mg, 81%).  $R_f = 0.26$  (EtOAc:heptane (1:3); UV;  $\text{KMnO}_4$ ); HPLC purity: 86% ( $R_t = 6.80$  min); IR (neat)  $\text{cm}^{-1}$ : 3418, 2920, 2848, 2798, 1454;  $^1\text{H}$  NMR (500 MHz, DMSO- $d_6$ )  $\delta$  10.71 (d,  $J = 31.3$  Hz,

1H), 7.46 (d,  $J = 7.8$  Hz, 1H), 7.30 (t,  $J = 12.7$  Hz, 1H), 7.11 (d,  $J = 1.6$  Hz, 1H), 7.04 (t,  $J = 7.4$  Hz, 1H), 6.96 (t,  $J = 7.3$  Hz, 1H), 5.91 – 5.74 (m, 1H), 5.21 (dd,  $J = 16.3, 8.4$  Hz, 1H), 5.11 (d,  $J = 10.4$  Hz, 1H), 3.12 (d,  $J = 5.7$  Hz, 2H), 2.83 – 2.75 (m, 2H), 2.70 – 2.63 (m, 2H), 2.26 (d,  $J = 6.9$  Hz, 2H), 1.74 (d,  $J = 12.7$  Hz, 2H), 1.64 (d,  $J = 11.8$  Hz, 3H), 1.44 (ddd,  $J = 10.6, 7.1, 3.5$  Hz, 1H), 1.25 – 1.05 (m, 3H), 0.88 – 0.70 (m, 2H);  $^{13}\text{C}$  NMR (75 MHz, DMSO- $d_6$ )  $\delta$  137.2, 136.9, 127.9, 123.1, 121.4, 118.8, 118.7, 117.4, 113.3, 112.0, 61.1, 57.9, 55.4, 36.3, 32.0, 27.1, 26.3, 23.2; HRMS (ESI)  $m/z$ : calcd for  $\text{C}_{20}\text{H}_{31}\text{N}_2$   $[\text{M} + \text{H}]^+$  297.2331, found 297.2325.

### *N*-Allyl-*N*-heptyltryptamine (1e)

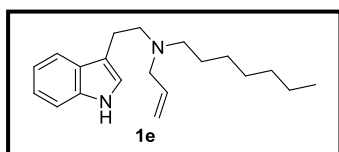

Following **general procedure (III)**, the reaction of *N*-heptyltryptamine (310 mg, 1.20 mmol), allyl bromide (290 mg, 207  $\mu\text{L}$ , 2.40 mmol) and  $\text{K}_2\text{CO}_3$  (497 mg, 3.60 mmol) gave after purification by flash column chromatography on silica gel ( $\text{Et}_3\text{N}:\text{MeOH}:\text{CH}_2\text{Cl}_2$ ; 1:2:97), the title compound as a brown oil (223 mg, 63%).  $R_f = 0.23$  ( $\text{EtOAc}:\text{heptane}$  (1:1); UV;  $\text{KMnO}_4$ ); HPLC purity: 81% ( $R_t = 7.16$  min); IR (neat)  $\text{cm}^{-1}$ : 3416, 2924, 2854, 1455, 1352, 1091;  $^1\text{H}$  NMR (500 MHz, DMSO- $d_6$ )  $\delta$  10.78 (s, 1H), 7.50 (d,  $J = 7.8$  Hz, 1H), 7.35 (d,  $J = 8.1$  Hz, 1H), 7.13 (d,  $J = 1.5$  Hz, 1H), 7.07 (t,  $J = 7.7$  Hz, 1H), 6.98 (t,  $J = 7.1$  Hz, 1H), 5.95 – 5.81 (m, 1H), 5.27 – 5.20 (m, 1H), 5.16 (dd,  $J = 14.4, 5.3$  Hz, 1H), 3.20 – 3.14 (m, 2H), 2.88 – 2.77 (m, 2H), 2.74 – 2.62 (m, 2H), 1.49 – 1.41 (m, 1H), 1.38 – 1.13 (m, 11H), 0.94 – 0.80 (m, 3H);  $^{13}\text{C}$  NMR (75 MHz, DMSO- $d_6$ )  $\delta$  136.5, 136.1, 127.2, 122.4, 120.7, 118.1, 118.0, 116.6, 112.6, 111.3, 56.6, 56.1, 54.1, 52.9, 31.3, 28.6, 26.8, 26.6, 22.4, 22.1, 13.9; HRMS (ESI)  $m/z$ : calcd for  $\text{C}_{20}\text{H}_{31}\text{N}_2$   $[\text{M} + \text{H}]^+$  299.2487, found 299.2484.

### *N,N*-Diallyltryptamine (1f)

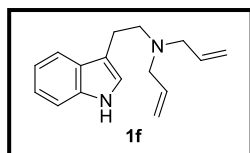

In a round-bottomed flask fitted with a magnetic stirring bar, and a reflux condenser, diallylamine (257 mg, 326  $\mu\text{L}$ , 2.67 mmol) was added to a stirred suspension of 3-(2-bromoethyl)indole (500 mg, 2.23 mmol) and  $\text{K}_2\text{CO}_3$  (431 mg, 3.12 mmol) in MeCN (2 mL). The reaction was stirred at reflux, and was monitored by TLC. Upon full conversion of the starting material (16 h), the reaction mixture was filtered through a pad of celite, which was washed with  $\text{CH}_2\text{Cl}_2$  (2 x 10 mL). The filtrate was evaporated *in vacuo*, to give the title compound as a light green oil (319 mg, 59%).  $R_f = 0.26$  ( $\text{EtOAc}:\text{heptane}$  (1:1); UV;  $\text{KMnO}_4$ ); HPLC purity: >95% ( $R_t = 5.41$  min); IR (neat)  $\text{cm}^{-1}$ : 3441, 2921, 2897, 1455, 1418, 1352, 1105, 994, 917, 736;  $^1\text{H}$  NMR (300 MHz,  $\text{CDCl}_3$ )  $\delta$  8.11 (s, 1H), 7.51 (d,  $J = 7.5$  Hz, 1H), 7.23 (d,  $J = 7.9$  Hz, 1H), 7.16 – 7.00 (m, 2H), 6.88 (s, 1H), 5.91 – 5.76 (m, 2H), 5.21 – 5.11 (m, 2H), 5.10 – 5.04 (m, 4H), 3.16 (d,  $J = 6.5$  Hz, 4H), 2.92 – 2.81 (m, 2H), 2.80 – 2.70 (m, 2H);  $^{13}\text{C}$  NMR (75 MHz,  $\text{CDCl}_3$ )  $\delta$  136.5, 135.9, 127.8, 122.1, 121.8, 119.4, 119.2, 118.0, 114.7, 111.4, 57.2, 54.2, 23.0; HRMS (ESI)  $m/z$ : calcd for  $\text{C}_{16}\text{H}_{21}\text{N}_2$   $[\text{M} + \text{H}]^+$  241.1705, found 241.1697.

### *N*-Allyl-*N*-phenyltryptamine (1g)

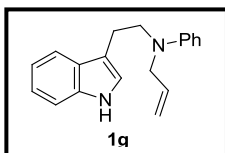

In a round-bottomed flask fitted with a magnetic stirring bar, allyl bromide (888 mg, 549  $\mu\text{L}$ , 6.35 mmol) was added to a stirred suspension of *N*-phenyltryptamine (300 mg,

1.27 mmol) and  $K_2CO_3$  (526 mg, 3.81 mmol) in DMF (3.5 mL). The reaction was stirred at rt, and was monitored by TLC. Upon full conversion of the starting material (4 h) the reaction mixture was evaporated *in vacuo*. The residue was taken up in  $CH_2Cl_2$  (50 mL) and water (30 mL) and transferred to a separatory funnel. The organic layer was separated and the aqueous phase was further extracted with  $CH_2Cl_2$  (1 x 50 mL). The combined organic layers were dried over  $Na_2SO_4$  and evaporated *in vacuo*, to give the title compound as a light brown powder (342 mg, >95%). m.p.: 66 – 68 °C;  $R_f$  = 0.36 (EtOAc:heptane (1:3); UV;  $KMnO_4$ ); HPLC purity: >95% ( $R_t$  = 6.86 min); IR (neat)  $cm^{-1}$ : 3388, 1667, 1594, 1503, 1358, 1231, 1165;  $^1H$  NMR (300 MHz,  $CDCl_3$ )  $\delta$  7.89 (s, 1H), 7.55 (dd,  $J$  = 7.8, 0.7 Hz, 1H), 7.30 (dt,  $J$  = 8.2, 0.9 Hz, 1H), 7.22 – 7.12 (m, 3H), 7.12 – 7.03 (m, 1H), 6.94 (d,  $J$  = 2.3 Hz, 1H), 6.70 (dd,  $J$  = 8.8, 0.9 Hz, 2H), 6.66 – 6.58 (m, 1H), 5.84 – 5.67 (m, 1H), 5.14 – 5.07 (m, 1H), 5.06 – 5.02 (m, 1H), 3.84 (dt,  $J$  = 4.8, 1.7 Hz, 2H), 3.60 – 3.51 (m, 2H), 2.99 (dd,  $J$  = 9.0, 6.6 Hz, 2H);  $^{13}C$  NMR (75 MHz,  $CDCl_3$ )  $\delta$  148.4, 136.5, 134.5, 129.7, 129.4, 127.7, 122.3, 122.0, 119.6, 119.0, 116.2, 113.9, 112.4, 111.5, 53.6, 51.7, 23.3; HRMS (ESI)  $m/z$ : calcd for  $C_{19}H_{21}N_2$   $[M + H]^+$  277.1705, found 277.1700.

### ***N*-Allyl-*N*-methyltryptamine (1h)**

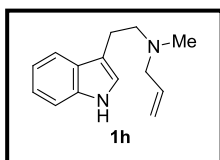

In a round-bottomed flask fitted with a magnetic stirring bar, and a reflux condenser *N*-methyl-allylamine (190 mg, 257  $\mu$ L, 2.68 mmol) was added to a stirred suspension of 3-(2-bromoethyl)indole (500 mg, 2.23 mmol) and  $K_2CO_3$  (432 mg, 3.12 mmol) in MeCN (2 mL). The reaction was stirred at reflux, and was monitored by TLC. Upon full conversion of the starting material (16 h), the reaction mixture was filtered through a pad of celite, which was washed with  $CH_2Cl_2$  (2 x 10 mL). The filtrate was evaporated *in vacuo*, to give the title compound as a light green oil (247 mg, 52%).  $R_f$  = 0.19 (EtOAc; UV;  $KMnO_4$ ); HPLC purity: >95% ( $R_t$  = 4.92 min); IR (neat)  $cm^{-1}$ : 3414, 2920, 2850, 2793, 1454, 1352, 1338, 1010, 994, 921, 735;  $^1H$  NMR (300 MHz,  $CDCl_3$ )  $\delta$  8.06 (s, 1H), 7.62 (ddt,  $J$  = 7.7, 1.4, 0.7 Hz, 1H), 7.37 – 7.33 (m, 1H), 7.22 – 7.09 (m, 2H), 7.02 (d,  $J$  = 2.3 Hz, 1H), 5.93 (ddt,  $J$  = 16.7, 10.1, 6.6 Hz, 1H), 5.25 – 5.18 (m, 1H), 5.18 – 5.13 (m, 1H), 3.13 (dt,  $J$  = 6.6, 1.2 Hz, 2H), 3.01 – 2.93 (m, 2H), 2.77 – 2.70 (m, 2H), 2.37 (s, 3H);  $^{13}C$  NMR (75 MHz,  $CDCl_3$ )  $\delta$  136.5, 135.5, 127.7, 123.0, 122.0, 119.2, 119.0, 118.2, 114.1, 111.5, 61.1, 58.0, 42.2, 23.4; MS (ESI)  $m/z$ : calcd for  $C_{14}H_{18}N_2$   $[M + H]^+$  215.2, found 215.3.

### ***N*-Allyl-*N*-benzyl-(5-methoxy)tryptamine (1i)**

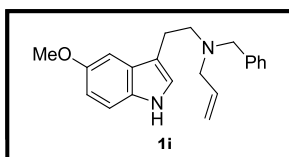

Following **general procedure (III)**, the reaction of *N*-benzyl-(5-methoxy)tryptamine (120 mg, 0.43 mmol), allyl bromide (104 mg, 74  $\mu$ L, 0.86 mmol) and  $K_2CO_3$  (177 mg, 1.28 mmol) gave after purification by flash column chromatography on silica gel ( $Et_3N$ :MeOH: $CH_2Cl_2$ ; 1:2:97), the title compound as a brown oil (116 mg, 85%).  $R_f$  = 0.25 (EtOAc:heptane (1:3); UV;  $KMnO_4$ ); HPLC purity: 81% ( $R_t$  = 6.13 min); IR (neat)  $cm^{-1}$ : 3416, 2930, 2828, 1584, 1484, 1452, 1214, 1027, 920;  $^1H$  NMR (300 MHz,  $CDCl_3$ )  $\delta$  7.76 (s, 1H), 7.36 – 7.10 (m, 5H), 6.86 (dd,  $J$  = 7.5, 2.4 Hz, 2H), 6.75 (dd,  $J$  = 8.8, 2.4 Hz, 1H), 5.89 (ddt,  $J$  = 16.7, 10.2, 6.4 Hz, 1H), 5.18 (dd,  $J$  = 17.2, 1.7 Hz, 1H), 5.11 (d,  $J$  = 10.1 Hz, 1H), 3.73 (s, 3H), 3.65 (s, 2H), 3.17 (d,  $J$  = 6.3 Hz, 2H), 2.89 – 2.83 (m, 2H), 2.78 – 2.71 (m, 2H);  $^{13}C$  NMR (75 MHz,  $CDCl_3$ )  $\delta$  154.2, 131.8, 131.7, 129.7, 128.6, 128.7, 122.9, 122.8, 112.5, 112.2, 100.8, 58.2, 56.3, 54.8, 53.8, 22.8; HRMS (ESI)  $m/z$ : calcd for  $C_{21}H_{25}N_2O$   $[M + H]^+$  321.1967, found 321.1960.



### *N*-Allyl-*N*-benzyl-(6-methoxy)tryptamine (1j)

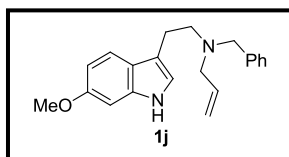

Following **general procedure (III)**, the reaction of *N*-benzyl-(6-methoxy)tryptamine (130 mg, 0.46 mmol), allyl bromide (112 mg, 80  $\mu$ L, 0.93 mmol) and  $K_2CO_3$  (192 mg, 1.39 mmol) gave after purification by flash column chromatography on silica gel ( $Et_3N:MeOH:CH_2Cl_2$ ; 1:2:97), the title compound as a brown oil (131 mg, 86%).  $R_f$  = 0.21 ( $EtOAc:heptane$  (1:3); UV;  $KMnO_4$ ); HPLC purity: >95% ( $R_t$  = 6.07 min); IR (neat)  $cm^{-1}$ : 3412, 2923, 2831, 1627, 1498, 1453, 1305, 1258, 1198, 1131;  $^1H$  NMR (300 MHz,  $CDCl_3$ )  $\delta$  7.74 (s, 1H), 7.33 – 7.09 (m, 6H), 6.77 (d,  $J$  = 2.2 Hz, 1H), 6.74 (d,  $J$  = 2.1 Hz, 1H), 6.67 (dd,  $J$  = 8.6, 2.3 Hz, 1H), 5.86 (ddt,  $J$  = 16.5, 10.2, 6.4 Hz, 1H), 5.19 – 5.11 (m, 1H), 5.11 – 5.05 (m, 1H), 3.75 (s, 3H), 3.62 (s, 2H), 3.13 (d,  $J$  = 6.4 Hz, 2H), 2.88 – 2.79 (m, 2H), 2.73 (ddd,  $J$  = 11.6, 6.7, 2.6 Hz, 2H);  $^{13}C$  NMR (75 MHz,  $CDCl_3$ )  $\delta$  156.6, 139.8, 137.2, 136.2, 129.3, 128.5, 127.11, 122.3, 120.6, 119.7, 117.7, 114.6, 109.3, 94.9, 58.4, 57.2, 55.9, 54.3, 23.2; MS (ESI)  $m/z$ : calcd for  $C_{21}H_{25}N_2O$  [ $M + H$ ] $^+$  321.2, found 321.4.

### *N*-Allyl-*N*-benzyl-(7-methyl)tryptamine (1k)

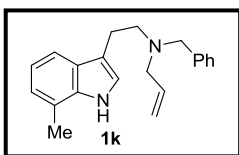

Following **general procedure (III)**, the reaction of *N*-benzyl-(7-methyl)tryptamine (100 mg, 0.49 mmol), allyl bromide (118 mg, 85  $\mu$ L, 0.98 mmol) and  $K_2CO_3$  (203 mg, 1.47 mmol) gave after purification by flash column chromatography on silica gel ( $Et_3N:MeOH:CH_2Cl_2$ ; 1:2:97), the title compound as a brown oil (108 mg, 72%).  $R_f$  = 0.45 ( $EtOAc:heptane$  (1:1); UV;  $KMnO_4$ ); HPLC purity: 90% ( $R_t$  = 6.58 min); IR (neat)  $cm^{-1}$ : 3421, 2919, 2799, 1494, 1452, 1340, 1066, 917;  $^1H$  NMR (300 MHz,  $CDCl_3$ ):  $\delta$  7.74 (s, 1H), 7.36 – 7.07 (m, 6H), 6.98 – 6.85 (m, 3H), 5.87 (ddt,  $J$  = 16.6, 10.1, 6.4 Hz, 1H), 5.15 (ddd,  $J$  = 17.2, 3.4, 1.5 Hz, 1H), 5.11 – 5.06 (m, 1H), 3.63 (s, 2H), 3.14 (d,  $J$  = 6.4 Hz, 2H), 2.94 – 2.82 (m, 2H), 2.79 – 2.67 (m, 2H), 2.38 (s, 3H);  $^{13}C$  NMR (75 MHz,  $CDCl_3$ )  $\delta$  139.6, 136.0, 129.3, 128.5, 127.3, 127.2, 122.7, 121.6, 120.5, 119.7, 117.9, 116.9, 115.2, 58.4, 57.1, 54.3, 23.3, 16.9; HRMS (ESI)  $m/z$ : calcd for  $C_{21}H_{25}N_2$  [ $M + H$ ] $^+$  305.2018, found 305.2012.

### *N*-Allyl-*N*-benzyl-(5-methyl)tryptamine (1l)

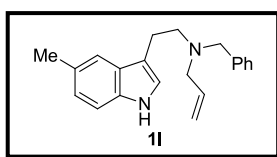

Following **general procedure (III)**, the reaction of *N*-benzyl-(5-methyl)tryptamine (220 mg, 0.83 mmol), allyl bromide (201 mg, 144  $\mu$ L, 1.66 mmol) and  $K_2CO_3$  (345 mg, 2.50 mmol) gave after purification by flash column chromatography on silica gel ( $Et_3N:MeOH:CH_2Cl_2$ ; 1:2:97), the title compound as a brown oil (193 mg, 76%).  $R_f$  = 0.18 ( $EtOAc:heptane$  (1:3); UV;  $KMnO_4$ ); HPLC purity: 92% ( $R_t$  = 6.61 min); IR (neat)  $cm^{-1}$ : 3416, 3027, 2918, 2803, 1452, 1227, 1091, 994, 918;  $^1H$  NMR (300 MHz,  $CDCl_3$ )  $\delta$  7.74 (s, 1H), 7.35 – 7.10 (m, 7H), 6.91 (dd,  $J$  = 8.3, 1.6 Hz, 1H), 6.85 (d,  $J$  = 2.3 Hz, 1H), 5.89 (ddt,  $J$  = 16.6, 10.2, 6.4 Hz, 1H), 5.17 (dd,  $J$  = 17.2, 1.8 Hz, 1H), 5.10 (d,  $J$  = 10.4 Hz, 1H), 3.64 (s, 2H), 3.16 (d,  $J$  = 6.4 Hz, 2H), 2.91 – 2.79 (m, 2H), 2.80 – 2.68 (m, 2H), 2.35 (s, 3H);  $^{13}C$  NMR (75 MHz,  $CDCl_3$ )  $\delta$  139.5, 136.0, 134.6, 129.1, 128.4, 128.3, 127.8, 127.0, 123.5, 121.8, 118.7, 117.6, 114.0, 110.8, 58.2, 57.0, 54.0, 23.0, 21.6; HRMS (ESI)  $m/z$ : calcd for  $C_{21}H_{25}N_2$  [ $M + H$ ] $^+$  305.2018, found 305.2013.

### *N*-Allyl-*N*-benzyl-(5-fluoro)tryptamine (1m)

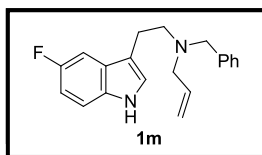

Following **general procedure (III)**, the reaction of *N*-benzyl-(5-fluoro)tryptamine (210 mg, 0.78 mmol), allyl bromide (189 mg, 136  $\mu$ L, 1.56 mmol) and  $K_2CO_3$  (324 mg, 2.35 mmol) gave after purification by flash column chromatography on silica gel ( $Et_3N$ :MeOH:CH<sub>2</sub>Cl<sub>2</sub>; 1:2:97), the title compound as a brown oil (131 mg, 54%).

$R_f$  = 0.45 (EtOAc:heptane (1:1)); UV;  $KMnO_4$ ; HPLC purity: >95% ( $R_t$  = 6.38 min); IR (neat)  $cm^{-1}$ : 3428, 2918, 2803, 1582 1484, 1420, 1173, 934, 792, 738, 698;  $^1H$  NMR (300 MHz,  $CDCl_3$ )  $\delta$  7.87 (s, 1H), 7.31 – 7.09 (m, 6H), 7.03 (dd,  $J$  = 9.7, 2.5 Hz, 1H), 6.90 (d,  $J$  = 2.3 Hz, 1H), 6.82 (td,  $J$  = 9.0, 2.5 Hz, 1H), 5.86 (ddt,  $J$  = 16.6, 10.2, 6.4 Hz, 1H), 5.19 – 5.12 (m, 1H), 5.12 – 5.06 (m, 1H), 3.62 (s, 2H), 3.14 (dt,  $J$  = 6.4, 1.2 Hz, 2H), 2.87 – 2.75 (m, 2H), 2.75 – 2.63 (m, 2H);  $^{13}C$  NMR (75 MHz,  $CDCl_3$ )  $\delta$  157.8 (d,  $J_{C-F}$  232.5 Hz, 1C), 139.4, 135.9, 133.3, 129.3, 128.5, 127.2, 123.8, 117.9, 114.6, 114.5, 112.0 (d,  $J_{C-F}$  = 9.8 Hz, 1C), 110.2 (d,  $J_{C-F}$  = 26.2 Hz, 1C), 103.9 (d,  $J_{C-F}$  = 22.5 Hz, 1C), 58.4, 57.1, 54.0, 23.0; HRMS (ESI)  $m/z$ : calcd for  $C_{20}H_{22}FN_2$  [ $M + H$ ]<sup>+</sup> 309.1767, found 309.1767.

### *N*-Allyl-*N*-benzyl-(6-bromo)tryptamine (1n)

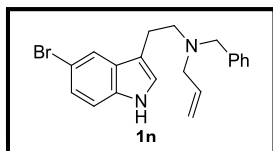

Following **general procedure (III)**, the reaction of *N*-benzyl-(6-bromo)tryptamine (240 mg, 0.73 mmol), allyl bromide (176 mg, 126  $\mu$ L, 1.46 mmol) and  $K_2CO_3$  (302 mg, 2.19 mmol) gave after purification by flash column chromatography on silica gel ( $Et_3N$ :MeOH:CH<sub>2</sub>Cl<sub>2</sub>; 1:2:97), the title compound as a brown oil (209 mg,

78%).  $R_f$  = 0.31 (EtOAc:heptane (1:3); UV;  $KMnO_4$ ); HPLC purity: >95% ( $R_t$  = 6.90 min); IR (neat)  $cm^{-1}$ : 3425, 2923, 2803, 1665, 1452, 1093, 791, 737, 698;  $^1H$  NMR (300 MHz,  $CDCl_3$ )  $\delta$  8.02 (s, 1H), 7.52 (d,  $J$  = 1.8 Hz, 1H), 7.29 – 7.11 (m, 6H), 7.07 (d,  $J$  = 8.6 Hz, 1H), 6.85 (d,  $J$  = 2.2 Hz, 1H), 5.92 – 5.77 (m, 1H), 5.19 – 5.11 (m, 1H), 5.11 – 5.06 (m, 1H), 3.60 (s, 2H), 3.12 (d,  $J$  = 6.4 Hz, 2H), 2.83 – 2.75 (m, 2H), 2.73 – 2.60 (m, 2H);  $^{13}C$  NMR (75 MHz,  $CDCl_3$ )  $\delta$  139.7, 136.2, 135.1, 129.7, 129.2, 128.5, 127.3, 124.9, 123.1, 121.8, 117.8, 114.6, 112.8, 112.7, 58.5, 57.2, 54.0, 23.1; HRMS (ESI)  $m/z$ : calcd for  $C_{20}H_{22}BrN_2$  [ $M + H$ ]<sup>+</sup> 369.0966, found 369.0964.

### *N*-Benzyl-*N*-(3,3-dimethyl)allyltryptamine (1o)

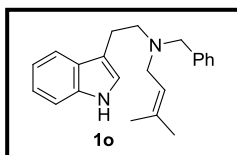

Following **general procedure (III)**, the reaction of *N*-benzyltryptamine (400 mg, 1.60 mmol), (3,3-dimethyl)allyl bromide (262 mg, 203  $\mu$ L, 1.76 mmol) and  $K_2CO_3$  (662 mg, 4.79 mmol) gave after purification by flash column chromatography ( $Et_3N$ :MeOH:CH<sub>2</sub>Cl<sub>2</sub>; 1:2:97), the title compound as a light yellow oil (468 mg, 92%).

$R_f$  = 0.21 (EtOAc:heptane (1:3); UV;  $KMnO_4$ ); HPLC purity: > 95% ( $R_t$  = 6.84 min); IR (neat)  $cm^{-1}$ : 3417, 3027, 2915, 2807, 1493, 1354, 1092;  $^1H$  NMR (300 MHz,  $DMSO-d_6$ )  $\delta$  10.74 (s, 1H), 7.41 – 7.15 (m, 7H), 7.10 – 6.97 (m, 2H), 6.91 (dd,  $J$  = 7.9, 7.0 Hz, 1H), 5.28 (t,  $J$  = 6.3 Hz, 1H), 3.62 (s, 2H), 3.10 (d,  $J$  = 6.7 Hz, 2H), 2.91 – 2.78 (m, 2H), 2.67 (dd,  $J$  = 9.5, 6.0 Hz, 2H), 1.70 (s, 3H), 1.59 (s, 3H);  $^{13}C$  NMR (75 MHz,  $DMSO-d_6$ )  $\delta$  139.8, 136.1, 133.9, 128.5, 128.0, 127.1, 126.6, 122.3, 121.9, 120.7, 118.1, 118.0, 112.5, 111.2, 57.5, 53.7, 50.7, 25.7, 22.5, 17.8; HRMS (ESI)  $m/z$ : calcd for  $C_{21}H_{25}N_2$  [ $M + H$ ]<sup>+</sup> 319.2174, found 319.2169.



### *N*-Benzyl-*N*-crotyltryptamine (**1p**)

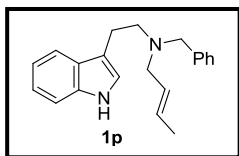

Following **general procedure (III)**, the reaction of *N*-benzyltryptamine (720 mg, 2.88 mmol), crotyl bromide (777 mg, 592  $\mu$ L, 5.75 mmol) and  $K_2CO_3$  (1.19 g, 8.62 mmol) gave after purification by flash column chromatography on silica gel ( $Et_3N$ :MeOH:CH<sub>2</sub>Cl<sub>2</sub>; 1:2:97), the title compound as a yellow oil (682 mg, 78%).  $R_f$  = 0.23 (EtOAc:heptane (1:3); UV;  $KMnO_4$ ); HPLC purity: 88% ( $R_t$  = 6.67 min); IR (neat)  $cm^{-1}$ : 3418, 3025, 2916, 2801, 1454, 1353, 1228, 996;  $^1H$  NMR (300 MHz, DMSO- $d_6$ )  $\delta$  10.75 (s, 1H), 7.41 – 7.26 (m, 6H), 7.26 – 7.17 (m, 1H), 7.08 – 7.05 (m, 1H), 7.01 (d,  $J$  = 8.0 Hz, 1H), 6.91 (td,  $J$  = 7.8, 0.9 Hz, 1H), 5.71 – 5.40 (m, 2H), 3.63 (s, 1H), 3.09 (d,  $J$  = 5.7 Hz, 2H), 2.90 – 2.78 (m, 2H), 2.71 – 2.60 (m, 2H), 1.67 (d,  $J$  = 5.8 Hz, 2H);  $^{13}C$  NMR (75 MHz, DMSO- $d_6$ )  $\delta$  139.7, 136.1, 128.5, 128.4, 128.0, 127.6, 127.1, 126.6, 122.3, 120.7, 118.1, 117.9, 112.5, 111.2, 57.2, 55.2, 53.4, 22.3, 17.6; HRMS (ESI)  $m/z$ : calcd for C<sub>21</sub>H<sub>25</sub>N<sub>2</sub> [ $M + H$ ]<sup>+</sup> 305.2018, found 305.2012.

### *N*-Benzyl-*N*-3-phenylprop-2-en-1-tryptamine (**1q**)

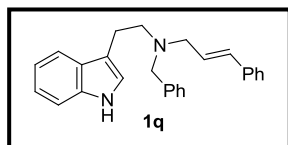

Following **general procedure (III)**, the reaction of *N*-3-phenylprop-2-en-1-tryptamine (380 mg, 1.38 mmol), benzyl bromide (263 mg, 183  $\mu$ L, 1.53 mmol) and  $K_2CO_3$  (577 mg, 4.18 mmol) gave after purification by flash column chromatography on silica gel (EtOAc:heptane; 1:3), the title compound as a yellow oil (330 mg, 66%).  $R_f$  = 0.25 (EtOAc:heptane (1:3); UV;  $KMnO_4$ ); HPLC purity: 91% ( $R_t$  = 7.41 min); IR (neat)  $cm^{-1}$ : 3420, 3025, 2919, 2799, 1493, 1454;  $^1H$  NMR (300 MHz, DMSO- $d_6$ )  $\delta$  10.74 (s, 1H), 7.46 – 7.17 (m, 12H), 7.08 (d,  $J$  = 1.9 Hz, 1H), 7.01 (dd,  $J$  = 8.0, 7.1 Hz, 1H), 6.84 (dd,  $J$  = 7.9, 7.0 Hz, 1H), 6.59 (d,  $J$  = 15.9 Hz, 1H), 6.45 – 6.30 (m, 1H), 3.69 (d,  $J$  = 19.7 Hz, 2H), 3.34 (s, 2H), 2.96 – 2.80 (m, 2H), 2.77 – 2.72 (m, 2H);  $^{13}C$  NMR (75 MHz, DMSO- $d_6$ )  $\delta$  139.6, 136.7, 136.1, 131.7, 128.6, 128.5, 128.1, 127.7, 127.2, 127.1, 126.7, 126.1, 122.4, 120.7, 118.2, 118.0, 112.5, 111.2, 57.5, 55.5, 53.7, 22.4; HRMS (ESI)  $m/z$ : calcd for C<sub>26</sub>H<sub>27</sub>N<sub>2</sub> [ $M + H$ ]<sup>+</sup> 367.2174, found 367.2170.

### *N*-Benzyl-*N*-3-(4-nitrophenyl)prop-2-en-1-tryptamine (**1r**)

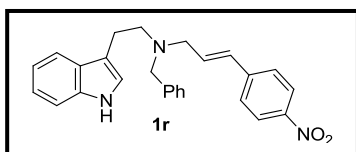

Following **general procedure (III)**, the reaction of *N*-3-(4-nitrophenyl)prop-2-en-1-tryptamine (200 mg, 0.62 mmol), benzyl bromide (117 mg, 81  $\mu$ L, 0.69 mmol) and  $K_2CO_3$  (258 mg, 1.87 mmol) gave after purification by flash column chromatography on silica gel ( $Et_3N$ :MeOH:CH<sub>2</sub>Cl<sub>2</sub>; 1:2:97), the title compound as a yellow oil (242 mg, 95%).  $R_f$  = 0.30 (EtOAc:heptane (3:7); UV;  $KMnO_4$ ); HPLC purity: >95% ( $R_t$  = 7.28 min); IR (neat)  $cm^{-1}$ : 3415, 2924, 2803, 1666, 1619, 1493, 1454, 1107;  $^1H$  NMR (300 MHz, DMSO- $d_6$ )  $\delta$  10.74 (s, 1H), 8.16 (d,  $J$  = 8.8 Hz, 2H), 7.65 (d,  $J$  = 8.8 Hz, 2H), 7.41 – 7.20 (m, 8H), 7.09 (d,  $J$  = 2.1 Hz, 1H), 7.02 (t,  $J$  = 7.2 Hz, 1H), 6.85 (t,  $J$  = 7.3 Hz, 1H), 6.72 – 6.60 (m, 1H), 3.74 (s, 2H), 3.39 – 3.33 (m, 2H), 2.97 – 2.85 (m, 2H), 2.80 – 2.69 (m, 2H);  $^{13}C$  NMR (75 MHz, DMSO- $d_6$ )  $\delta$  162.2, 146.1, 143.5, 136.14, 128.7, 128.7, 128.1, 127.1, 127.01, 126.9, 123.8, 122.5, 120.7, 118.2, 118.0, 111.3, 57.5, 55.2, 35.7, 30.7; HRMS (ESI)  $m/z$ : calcd for C<sub>26</sub>H<sub>26</sub>N<sub>3</sub>O<sub>2</sub> [ $M + H$ ]<sup>+</sup> 412.2025, found 412.2021.

***N*-Benzyl-*N*-3-(4-methoxyphenyl)prop-2-en-1-tryptamine (1s)**

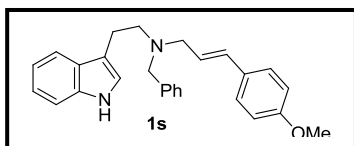

Following **general procedure (III)**, the reaction of *N*-3-(4-methoxyphenyl)prop-2-en-1-tryptamine (400 mg, 1.31 mmol), benzyl bromide (246 mg, 171  $\mu$ L, 1.44 mmol) and  $K_2CO_3$  (541 mg, 3.92 mmol) gave after purification by flash column chromatography on silica gel ( $Et_3N$ :MeOH:CH<sub>2</sub>Cl<sub>2</sub>; 1:2:97), the title compound as a yellow oil (495 mg, >95%).  $R_f$  = 0.43 (EtOAc:heptane (1:1); UV;  $KMnO_4$ ); HPLC purity: >95% ( $R_t$  = 7.31 min); IR (neat)  $cm^{-1}$ : 3419, 2926, 2833, 1666, 1606, 1509, 1454, 1245, 1174, 1030;  $^1H$  NMR (300 MHz, DMSO- $d_6$ )  $\delta$  10.73 (s, 1H), 7.41 – 7.21 (m, 9H), 7.07 (d,  $J$  = 2.2 Hz, 1H), 7.01 (t,  $J$  = 7.5 Hz, 1H), 6.91 – 6.81 (m, 3H), 6.52 (d,  $J$  = 16.0 Hz, 1H), 6.21 (dt,  $J$  = 15.8, 6.4 Hz, 1H), 3.74 (s, 3H), 3.71 (s, 2H), 3.30 (d,  $J$  = 6.3 Hz, 2H), 2.94 – 2.82 (m, 2H), 2.78 – 2.65 (m, 2H);  $^{13}C$  NMR (75 MHz, DMSO- $d_6$ )  $\delta$  158.6, 139.7, 136.1, 131.3, 129.4, 128.6, 128.1, 127.3, 127.1, 126.6, 125.1, 122.4, 120.7, 118.2, 118.0, 113.9, 112.5, 111.2, 57.5, 55.6, 55.0, 53.6, 22.3; HRMS (ESI)  $m/z$ : calcd for C<sub>26</sub>H<sub>29</sub>N<sub>2</sub>O [M + H]<sup>+</sup> 397.2280, found 397.2276.

## Synthesis of THBCs 2a-s

### THBC 2a

#### General procedure IV: Formation of THBCs via tandem isomerization/N-alkyliminium ion cyclization

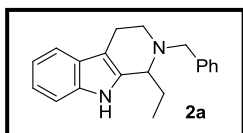

In a Schlenk tube fitted with a magnetic stirring bar and a reflux condenser, **1a** (200 mg, 0.69 mmol) and  $\text{Rh}(\text{PPh}_3)_3\text{Cl}$  (31.9 mg, 0.034 mmol) were dissolved in toluene (6.9 mL). The reaction was stirred at reflux, and was monitored by TLC. Upon full conversion of the starting material (5 h), the reaction mixture was filtered through a pad of celite, which was washed with  $\text{CH}_2\text{Cl}_2$  (2 x 20 mL). The filtrate was evaporated *in vacuo*, and the residue was then purified by flash column chromatography on silica gel ( $\text{Et}_3\text{N}:\text{MeOH}:\text{CH}_2\text{Cl}_2$ ; 1:1:98), to give the title compound as a yellow oil (179 mg, 90%).  $R_f$  = 0.31 ( $\text{EtOAc}:\text{heptane}$  (1:3); UV;  $\text{KMnO}_4$ ); HPLC purity: 89% ( $R_t$  = 6.34 min); IR (neat)  $\text{cm}^{-1}$ : 3408, 3082, 3027, 2929, 2841, 1449, 1227;  $^1\text{H}$  NMR (300 MHz,  $\text{DMSO}-d_6$ )  $\delta$  10.66 (s, 1H), 7.38 - 7.26. (m, 7H),  $\delta$  7.02 (t,  $J$  = 7.3 Hz, 1H), 6.94 (t,  $J$  = 7.2 Hz, 1H), 3.79 (d,  $J$  = 13.5 Hz, 1H), 3.64 (d,  $J$  = 13.6 Hz, 1H), 3.54 (s, 1H), 3.19 – 2.98 (m, 1H), 2.85 – 2.67 (m, 2H), 2.52 (s, 1H), 1.91 – 1.71 (m, 2H), 0.88 (t,  $J$  = 7.2 Hz, 3H);  $^{13}\text{C}$  NMR (75 MHz,  $\text{DMSO}-d_6$ )  $\delta$  139.8, 135.8, 135.6, 128.6, 128.1, 126.8, 126.7, 120.3, 118.1, 117.4, 110.8, 106.2, 57.7, 56.7, 44.9, 26.0, 18.0, 10.3; HRMS (ESI)  $m/z$ : calcd for  $\text{C}_{20}\text{H}_{23}\text{N}_2$  [ $\text{M} + \text{H}$ ] $^+$  291.1861, found 291.1854.

### THBC 2b

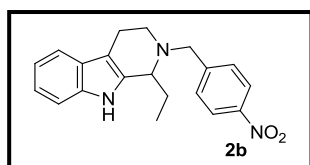

Following **general procedure (IV)**, the reaction of **1b** (250 mg, 0.75 mmol) and  $\text{Rh}(\text{PPh}_3)_3\text{Cl}$  (34.5 mg, 0.037 mmol) gave after purification by flash column chromatography on silica gel ( $\text{Et}_3\text{N}:\text{MeOH}:\text{CH}_2\text{Cl}_2$ ; 1:1:98), the title compound as a yellow powder (214 mg, 86%). m.p.: 56 – 58 °C;  $R_f$  = 0.22 ( $\text{EtOAc}:\text{heptane}$  (1:3); UV;  $\text{KMnO}_4$ ); HPLC purity: >95% ( $R_t$  = 6.44 min); IR (neat)  $\text{cm}^{-1}$ : 3402, 2931, 1559, 1513, 1340;  $^1\text{H}$  NMR (300 MHz,  $\text{DMSO}-d_6$ )  $\delta$  10.67 (s, 1H), 8.22 (d,  $J$  = 8.6 Hz, 2H), 7.68 (d,  $J$  = 8.0 Hz, 2H), 7.38 (d,  $J$  = 7.5 Hz, 1H), 7.28 (d,  $J$  = 7.8 Hz, 1H), 7.02 (t,  $J$  = 6.9 Hz, 1H), 6.94 (t,  $J$  = 7.1 Hz, 1H), 3.92 (d,  $J$  = 14.8 Hz, 1H), 3.80 (d,  $J$  = 14.7 Hz, 1H), 3.58 – 3.47 (m, 1H), 3.14 – 2.98 (m, 1H), 2.83 – 2.78 (m, 2H), 2.76 – 2.25 (m, 2H), 2.57 – 2.52 (m, 1H), 1.93 – 1.73 (m, 2H), 0.89 (t,  $J$  = 7.3 Hz, 3H);  $^{13}\text{C}$  NMR (75 MHz,  $\text{DMSO}-d_6$ )  $\delta$  148.5, 146.4, 135.8, 135.3, 129.4, 126.7, 123.3, 120.3, 118.1, 117.4, 110.8, 106.1, 58.3, 56.0, 45.0, 26.0, 18.0, 10.3; HRMS (ESI)  $m/z$ : calcd for  $\text{C}_{20}\text{H}_{22}\text{N}_3\text{O}_2$  [ $\text{M} + \text{H}$ ] $^+$  336.1712, found 336.1710.

### THBC 2c

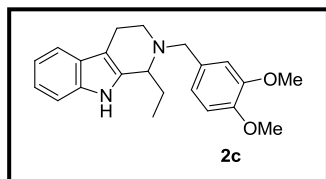

Following **general procedure (IV)**, the reaction of **1c** (300 mg, 0.86 mmol) and  $\text{Rh}(\text{PPh}_3)_3\text{Cl}$  (39.6 mg, 0.043 mmol) gave after purification by flash column chromatography on silica gel ( $\text{Et}_3\text{N}:\text{EtOAc}:\text{heptane}$ ; 1:20:79), the title compound as a yellow crystal (232 mg, 77%). m.p.: 69 – 72 °C;  $R_f$  = 0.32 ( $\text{EtOAc}:\text{heptane}$  (1:1); UV;  $\text{KMnO}_4$ ); HPLC purity: 88% ( $R_t$  = 6.28 min); IR (neat)  $\text{cm}^{-1}$ : 3366, 2932, 2835, 1511, 1462, 1451, 1257, 1257, 1229, 1135, 1024;  $^1\text{H}$  NMR (300 MHz,  $\text{DMSO}-d_6$ )  $\delta$  10.63 (s, 1H), 7.37 (d,  $J$  = 7.5 Hz, 1H), 7.27 (d,  $J$  = 7.8 Hz, 1H), 7.05 – 6.79 (m, 5H), 3.73 (s,

6H), 3.70 – 3.46 (m, 3H), 3.16 – 3.07 (m, 1H), 2.89 – 2.67 (m, 2H), 2.58 – 2.42 (m, 1H), 1.79 (ddq,  $J = 28.4$ , 14.2, 7.2 Hz, 2H), 0.90 (t,  $J = 7.3$  Hz, 3H);  $^{13}\text{C}$  NMR (75 MHz, DMSO- $d_6$ )  $\delta$  148.5, 147.6, 135.8, 135.7, 132.1, 126.8, 120.5, 120.2, 118.0, 117.4, 112.1, 111.3, 110.7, 106.0, 57.1, 56.3, 55.4, 55.2, 44.9, 26.2, 18.0, 10.5; HRMS (ESI)  $m/z$ : calcd for  $\text{C}_{22}\text{H}_{27}\text{N}_2\text{O}_2$   $[\text{M} + \text{H}]^+$  351.2073, found 351.2067.

### THBC 2d

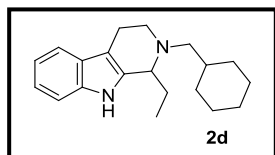

Following **general procedure (IV)**, the reaction of **1d** (200 mg, 0.67 mmol) and  $\text{Rh}(\text{PPh}_3)_3\text{Cl}$  (31.2 mg, 0.034 mmol) gave after purification by flash column chromatography on silica gel ( $\text{Et}_3\text{N}:\text{EtOAc}:\text{heptane}$ ; 1:10:89), the title compound as a brown oil (171 mg, 86%).  $R_f = 0.20$  ( $\text{EtOAc}:\text{heptane}$  (1:3)); UV;  $\text{KMnO}_4$ ; HPLC purity: >95% ( $R_t = 6.74$  min); IR (neat)  $\text{cm}^{-1}$ : 3407, 2918, 2846, 1464, 1446;  $^1\text{H}$  NMR (300 MHz,  $\text{CDCl}_3$ )  $\delta$  7.53 (s, 1H), 7.41 (d,  $J = 8.3$  Hz, 1H), 7.23 – 7.18 (m, 1H), 7.09 – 6.96 (m, 2H), 3.43 – 3.34 (m, 1H), 3.18 – 3.03 (m, 1H), 2.82 – 2.62 (m, 2H), 2.45 (dt,  $J = 10.5$ , 4.7 Hz, 1H), 2.28 (qd,  $J = 12.6$ , 7.0 Hz, 2H), 1.86 – 1.53 (m, 7H), 1.51 – 1.34 (m, 1H), 1.25 – 1.05 (m, 4H), 0.92 (t,  $J = 7.3$  Hz, 3H), 0.88 – 0.72 (m, 2H);  $^{13}\text{C}$  NMR (75 MHz,  $\text{CDCl}_3$ )  $\delta$  136.2, 136.0, 127.7, 121.4, 119.4, 118.3, 110.9, 108.6, 60.7, 59.8, 45.9, 36.8, 32.3, 32.0, 27.5, 27.3, 26.7, 18.5, 11.0; HRMS (ESI)  $m/z$ : calcd for  $\text{C}_{20}\text{H}_{29}\text{N}_2$   $[\text{M} + \text{H}]^+$  297.2331, found 297.2326.

### THBC 2e

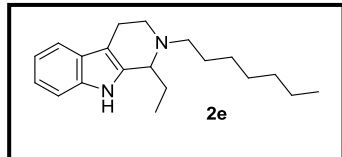

Following **general procedure (IV)**, the reaction of **1e** (150 mg, 0.50 mmol) and  $\text{Rh}(\text{PPh}_3)_3\text{Cl}$  (23.2 mg, 0.025 mmol) gave after purification by flash column chromatography on silica gel ( $\text{Et}_3\text{N}:\text{EtOAc}:\text{heptane}$ ; 1:5:94), the title compound as a brown oil (103 mg, 69%);  $R_f = 0.21$  ( $\text{EtOAc}:\text{heptane}$  (1:3)); UV;  $\text{KMnO}_4$ ; HPLC purity: >95% ( $R_t = 7.39$  min); IR (neat)  $\text{cm}^{-1}$ : 3408, 2925, 2854, 1464, 1452;  $^1\text{H}$  NMR (300 MHz, DMSO- $d_6$ )  $\delta$  10.62 (s,  $J = 24.5$  Hz, 1H), 7.34 (d,  $J = 7.6$  Hz, 1H), 7.26 (d,  $J = 7.9$  Hz, 1H), 6.99 (dt,  $J = 8.1$ , 1.2 Hz, 1H), 6.92 (dt,  $J = 7.2$ , 0.9 Hz, 1H), 3.51 (dd,  $J = 7.0$ , 4.1 Hz, 1H), 3.08 (ddd,  $J = 14.0$ , 8.8, 4.9 Hz, 1H), 2.72 (ddd,  $J = 22.5$ , 8.5, 4.6 Hz, 2H), 2.60 – 2.40 (m, 2H), 1.94 – 1.59 (m, 2H), 1.53 – 1.45 (m, 2H), 1.39 – 1.22 (m, 8H), 0.96 – 0.73 (m, 6H);  $^{13}\text{C}$  NMR (75 MHz, DMSO- $d_6$ )  $\delta$  136.7, 136.5, 127.4, 120.9, 118.7, 118.0, 111.5, 107.1, 58.9, 53.2, 45.9, 32.1, 29.4, 28.3, 27.5, 26.6, 22.8, 18.9, 14.7, 11.1; HRMS (ESI)  $m/z$ : calcd for  $\text{C}_{20}\text{H}_{31}\text{N}_2$   $[\text{M} + \text{H}]^+$  299.2487, found 299.2482.

### THBC 2f

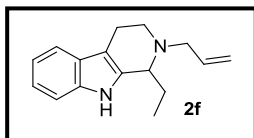

Following **general procedure (IV)**, the reaction of **1f** (100 mg, 0.42 mmol) and  $\text{Rh}(\text{PPh}_3)_3\text{Cl}$  (19.2 mg, 0.021 mmol) gave after purification by flash column chromatography on silica gel ( $\text{Et}_3\text{N}:\text{EtOAc}:\text{heptane}$ ; 1:25:74), the title compound as a brown oil (71 mg, 71%).  $R_f = 0.17$  ( $\text{EtOAc}:\text{heptane}$  (1:3)); UV;  $\text{KMnO}_4$ ; HPLC purity: >95% ( $R_t = 5.47$  min); IR (neat)  $\text{cm}^{-1}$ : 3406, 2931, 1464, 1449, 1299, 918, 737;  $^1\text{H}$  NMR (300 MHz,  $\text{CDCl}_3$ )  $\delta$  7.68 (s, 1H), 7.50 (ddd,  $J = 7.3$ , 1.5, 0.7 Hz, 1H), 7.34 – 7.29 (m, 1H), 7.19 – 7.07 (m, 2H), 5.96 (ddt,  $J = 16.9$ , 10.2, 6.4 Hz, 1H), 5.20 – 5.15 (m, 1H), 5.15 – 5.11 (m, 1H), 3.62 (t,  $J = 6.3$  Hz, 1H), 3.29 – 3.23 (m, 2H), 3.23 – 3.19 (m, 1H), 2.95 (ddd,  $J = 13.1$ , 5.1, 3.7 Hz, 1H), 2.83 (dddd,  $J = 14.3$ , 9.2, 5.1, 1.3

Hz, 1H), 2.60 (dddd,  $J = 5.9, 4.7, 3.7, 0.7$  Hz, 1H), 1.89 – 1.72 (m, 2H), 1.03 (t,  $J = 7.4$  Hz, 3H);  $^{13}\text{C}$  NMR (75 MHz,  $\text{CDCl}_3$ )  $\delta$  137.0, 136.1, 135.5, 127.6, 121.6, 119.6, 118.4, 117.5, 110.9, 108.4, 57.9, 56.6, 45.6, 27.4, 18.5, 11.2; HRMS (ESI)  $m/z$ : calcd for  $\text{C}_{16}\text{H}_{21}\text{N}_2$   $[\text{M} + \text{H}]^+$  241.1705, found 241.1704.

### THBC 2g

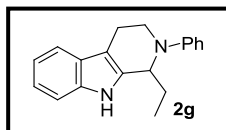

Following **general procedure (IV)**, the reaction of **1g** (130 mg, 0.47 mmol) and  $\text{Rh}(\text{PPh}_3)_3\text{Cl}$  (65.3 mg, 0.071 mmol) gave after purification by flash column chromatography on silica gel ( $\text{Et}_3\text{N}:\text{EtOAc}:\text{heptane}$ ; 1:10:89), the title compound as a brown oil (64 mg, 49%).  $R_f = 0.34$  ( $\text{EtOAc}:\text{heptane}$  (1:4); UV;  $\text{KMnO}_4$ ); HPLC purity: 86% ( $R_t = 7.13$  min); IR (neat)  $\text{cm}^{-1}$ : 3399, 3340, 2957, 2923, 2853, 1695, 1595, 1452;  $^1\text{H}$  NMR (300 MHz,  $\text{CDCl}_3$ )  $\delta$  7.64 (s, 1H), 7.39 (d,  $J = 7.6$  Hz, 1H), 7.26 – 6.96 (m, 5H), 6.90 (dd,  $J = 8.8, 0.9$  Hz, 2H), 6.69 (tt,  $J = 7.3, 1.0$  Hz, 1H), 4.60 (t,  $J = 6.8$  Hz, 1H), 3.86 (ddd,  $J = 13.9, 5.1, 1.2$  Hz, 1H), 3.48 (ddd,  $J = 14.0, 11.4, 4.2$  Hz, 1H), 2.89 (dddd,  $J = 16.6, 11.4, 5.2, 1.3$  Hz, 1H), 2.58 (ddd,  $J = 15.3, 4.2, 1.7$  Hz, 1H), 1.94 – 1.80 (m, 2H), 1.05 (t,  $J = 7.4$  Hz, 3H);  $^{13}\text{C}$  NMR (75 MHz,  $\text{CDCl}_3$ )  $\delta$  151.1, 136.1, 135.9, 129.5, 127.5, 121.9, 119.7, 118.7, 118.4, 116.5, 111.0, 109.4, 57.6, 42.3, 27.9, 20.0, 11.7; HRMS (ESI)  $m/z$ : calcd for  $\text{C}_{19}\text{H}_{21}\text{N}_2$   $[\text{M} + \text{H}]^+$  277.1705, found 277.1705

### THBC 2h

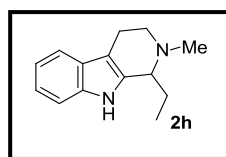

Following **general procedure (IV)**, the reaction of **1h** (100 mg, 0.47 mmol) and  $\text{Rh}(\text{PPh}_3)_3\text{Cl}$  (21.6 mg, 0.023 mmol) gave after purification by flash column chromatography on silica gel ( $\text{Et}_3\text{N}:\text{heptane}:\text{EtOAc}$ ; 1:20:79), the title compound as a yellow oil (75 mg, 75%).  $R_f = 0.17$  ( $\text{EtOAc}$ ; UV;  $\text{KMnO}_4$ ); HPLC purity: 93% ( $R_t = 5.47$  min); IR (neat)  $\text{cm}^{-1}$ : 3410, 2932, 2791, 1450, 1374, 1128;  $^1\text{H}$  NMR (300 MHz,  $\text{CDCl}_3$ )  $\delta$  7.79 (s, 1H), 7.57 – 7.43 (m, 1H), 7.34 – 7.29 (m, 1H), 7.12 (dtd,  $J = 14.4, 7.1, 1.4$  Hz, 2H), 3.47 (t,  $J = 5.2$  Hz, 1H), 3.24 – 3.09 (m, 1H), 2.84 – 2.71 (m, 2H), 2.48 (s, 3H), 1.96 (dq,  $J = 14.7, 7.4, 5.1$  Hz, 1H), 1.78 (dq,  $J = 14.6, 7.4, 5.3$  Hz, 1H), 0.94 (t,  $J = 7.4$  Hz, 3H);  $^{13}\text{C}$  NMR (75 MHz,  $\text{CDCl}_3$ )  $\delta$  136.3, 135.1, 127.6, 121.6, 119.6, 118.3, 111.0, 109.0, 61.5, 50.6, 42.4, 25.7, 19.76, 9.9; MS (ESI)  $m/z$ : calcd for  $\text{C}_{14}\text{H}_{18}\text{N}_2$   $[\text{M} + \text{H}]^+$  215.2, found 215.3.

### THBC 2i

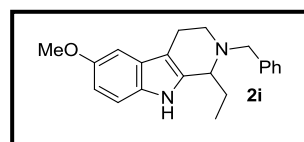

Following **general procedure (IV)**, the reaction of **1i** (80 mg, 0.25 mmol) and  $\text{Rh}(\text{PPh}_3)_3\text{Cl}$  (11.5 mg, 0.0012 mmol) gave after purification by flash column chromatography on silica gel ( $\text{Et}_3\text{N}:\text{EtOAc}:\text{heptane}$ ; 1:10:89), the title compound as a brown oil (51 mg, 64%);  $R_f = 0.25$  ( $\text{EtOAc}:\text{heptane}$  (1:3); UV;  $\text{KMnO}_4$ ); HPLC purity: >95% ( $R_t = 6.20$  min); IR (neat)  $\text{cm}^{-1}$ : 3406, 2930, 2830, 1589, 1481, 1452, 1434, 1295, 1211, 1150, 1027;  $^1\text{H}$  NMR (300 MHz,  $\text{CDCl}_3$ )  $\delta$  7.46 (s, 1H), 7.35 – 7.16 (m, 5H), 7.12 (d,  $J = 8.7$  Hz, 1H), 6.89 (d,  $J = 2.5$  Hz, 1H), 6.73 (dd,  $J = 8.7, 2.5$  Hz, 1H), 3.79 (s, 1H), 3.77 – 3.71 (d, 13.5, 1H), 3.63 (d,  $J = 13.5$  Hz, 1H), 3.47 (t,  $J = 6.3$  Hz, 1H), 3.14 (ddd,  $J = 14.9, 9.5, 5.1$  Hz, 1H), 2.77 (dddd,  $J = 8.8, 7.0, 6.3, 3.1$  Hz, 2H), 2.48 (dt,  $J = 8.8, 4.8$  Hz, 1H), 1.81 – 1.64 (m, 2H), 0.89 (t,  $J = 7.4$  Hz, 3H);  $^{13}\text{C}$  NMR (75 MHz,  $\text{CDCl}_3$ )

$\delta$  154.1, 139.7, 136.3, 131.0, 129.0, 128.30, 127.8, 127.1, 111.4, 111.2, 107.9, 100.5, 58.3, 57.3, 56.1, 45.1, 27.3, 18.3, 10. 8; HRMS (ESI)  $m/z$ : calcd for  $C_{21}H_{25}N_2$   $[M + H]^+$  321.1967, found 321.1962.

### THBC 2j

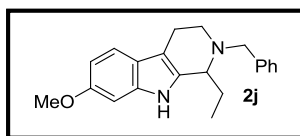

Following general **procedure (IV)**, the reaction of **1j** (100 mg, 0.31 mmol) and  $Rh(PPh_3)_3Cl$  (14.4 mg, 0.017 mmol) gave after purification by flash column chromatography on silica gel ( $Et_3N:EtOAc:heptane$ ; 1:10:89), the title compound as a brown oil (76 mg, 76%).  $R_f$  = 0.23 ( $EtOAc:heptane$  (1:3); UV;  $KMnO_4$ ); HPLC purity: 69% ( $R_t$  = 6.18 min); IR (neat)  $cm^{-1}$ : 3368, 1687, 1458, 1200, 1158, 1048, 1003;  $^1H$  NMR (300 MHz,  $CDCl_3$ )  $\delta$  7.44 (s, 1H), 7.37 – 7.10 (m, 6H), 6.75 (d,  $J$  = 2.2 Hz, 1H), 6.70 (dd,  $J$  = 8.5, 2.3 Hz, 1H), 3.75 (s, 3H), 3.70 (d,  $J$  = 2.7 Hz, 1H), 3.61 (d,  $J$  = 13.5 Hz, 1H), 3.44 (t,  $J$  = 6.3 Hz, 1H), 3.12 (ddd,  $J$  = 14.9, 9.5, 5.0 Hz, 1H), 2.76 (ddt,  $J$  = 7.5, 5.2, 4.4 Hz, 2H), 2.46 (dt,  $J$  = 8.5, 4.7 Hz, 1H), 1.78 – 1.65 (m, 2H), 0.88 (t,  $J$  = 7.4 Hz, 3H);  $^{13}C$  NMR (75 MHz,  $CDCl_3$ )  $\delta$  156.3, 140.3, 136.8, 134.5, 129.2, 128.5, 127.2, 122.2, 118.8, 108.9, 108.2, 95.4, 58.4, 57.6, 56.2, 45.4, 27.5, 18.6, 11.0; MS (ESI)  $m/z$ : calcd for  $C_{21}H_{24}N_2$   $[M + H]^+$  321,2, found 321,5.

### THBC 2k

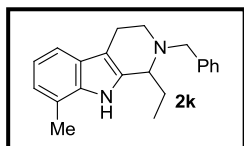

Following **general procedure (IV)**, the reaction of **1k** (80 mg, 0.26 mmol) and  $Rh(PPh_3)_3Cl$  (12.2 mg, 0.013 mmol) gave after purification by flash column chromatography on silica gel ( $Et_3N:EtOAc:heptane$ ; 1:10:89), the title compound as a yellow oil (64 mg, 80%).  $R_f$  = 0.34 ( $EtOAc:heptane$  (1:3); UV;  $KMnO_4$ ); HPLC purity: 83% ( $R_t$  = 6.78 min); IR (neat)  $cm^{-1}$ : 3416, 2929, 1541, 1452, 1335, 903;  $^1H$  NMR (300 MHz,  $CDCl_3$ )  $\delta$  7.46 (s, 1H), 7.34 – 7.14 (m, 6H), 6.99 – 6.93 (t,  $J$  = 7.3 Hz, 1H), 6.88 (d,  $J$  = 7.1 Hz, 1H), 3.74 (d,  $J$  = 13.5 Hz, 1H), 3.65 (d,  $J$  = 13.5 Hz, 1H), 3.51 (t,  $J$  = 6.4 Hz, 1H), 3.16 (ddd,  $J$  = 14.4, 9.7, 5.0 Hz, 1H), 2.90 – 2.70 (m, 2H), 2.50 (dt,  $J$  = 8.1, 4.9 Hz, 1H), 2.39 (s, 3H), 1.81 – 1.69 (m, 2H), 0.91 (t,  $J$  = 7.4 Hz, 3H);  $^{13}C$  NMR (75 MHz,  $CDCl_3$ )  $\delta$  140.0, 135.4, 135.2, 129.0, 128.3, 127.0, 122.2, 119.9, 119.6, 115.9, 108.7, 58.1, 57.4, 45.0, 27.5, 18.3, 16.9, 10.9; HRMS (ESI)  $m/z$ : calcd for  $C_{21}H_{25}N_2$   $[M + H]^+$  305.2018, found 305.2013.

### THBC 2l

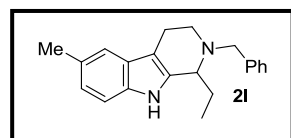

Following **general procedure (IV)**, the reaction of **1l** (150 mg, 0.49 mmol) and  $Rh(PPh_3)_3Cl$  (22.8 mg, 0.025 mmol) gave after purification by flash column chromatography on silica gel ( $Et_3N:EtOAc:heptane$ ; 1:10:89), the title compound as a brown oil (121 mg, 81%).  $R_f$  = 0.30 ( $EtOAc:heptane$  (1:3); UV;  $KMnO_4$ ); HPLC purity: 94% ( $R_t$  = 6.76 min); IR (neat)  $cm^{-1}$ : 3405, 2929, 1451, 1388, 1315, 1300;  $^1H$  NMR (300 MHz,  $CDCl_3$ )  $\delta$  7.51 (s, 1H), 7.34 – 7.08 (m, 7H), 6.90 (dd,  $J$  = 8.2, 1.4 Hz, 1H), 3.74 (d,  $J$  = 13.5 Hz, 1H), 3.69 (d,  $J$  = 20.6 Hz, 1H), 3.55 – 3.44 (m, 1H), 3.15 (ddd,  $J$  = 14.7, 9.5, 5.3 Hz, 1H), 2.91 – 2.67 (m, 2H), 2.61 – 2.42 (m, 1H), 2.38 (s, 3H), 1.84 – 1.65 (m, 2H), 0.89 (t,  $J$  = 7.5 Hz, 3H);  $^{13}C$  NMR (75 MHz,  $CDCl_3$ )  $\delta$  140.0, 135.7, 134.2, 129.0, 128.4, 128.3, 127.6, 127.0, 123.0, 117.9, 110.5, 107.5, 77.1, 58.1, 57.3, 45.1, 27.2, 21.6, 18.3, 10.7; HRMS (ESI)  $m/z$ : calcd for  $C_{21}H_{25}N_2$   $[M + H]^+$  305.2018, found 305.2013.



### THBC 2m

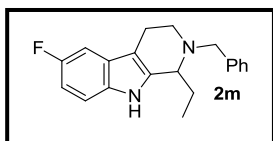

Following **general procedure (IV)**, the reaction of **1m** (100 mg, 0.32 mmol) and Rh(PPh<sub>3</sub>)<sub>3</sub>Cl (15.0 mg, 0.016 mmol) gave after purification by flash column chromatography on silica gel (Et<sub>3</sub>N:EtOAc:heptane; 1:10:89), the title compound as a brown oil (42 mg, 42%). *R*<sub>f</sub> = 0.34 (EtOAc:heptane (1:3); UV; KMnO<sub>4</sub>); HPLC purity: >95% (*R*<sub>t</sub> = 6.41 min); IR (neat) cm<sup>-1</sup>: 3419, 2930, 2803, 1584, 1482, 1318, 1130, 848, 765; <sup>1</sup>H NMR (300 MHz, CDCl<sub>3</sub>) δ 7.55 (s, 1H), 7.34 – 7.10 (m, 6H), 7.06 (dd, *J* = 9.5, 2.5 Hz, 1H), 6.81 (dt, *J* = 9.0, 2.4 Hz, 1H), 3.74 (d, *J* = 13.5 Hz, 1H), 3.63 (d, *J* = 13.5 Hz, 1H), 3.49 (t, *J* = 6.3 Hz, 1H), 3.13 (ddd, *J* = 10.9, 7.9, 3.8 Hz, 1H), 2.87 – 2.66 (m, 2H), 2.46 (dt, *J* = 8.7, 5.1 Hz, 1H), 1.81 – 1.64 (m, 2H), 0.90 (t, *J* = 7.4 Hz, 3H); <sup>13</sup>C NMR (75 MHz, CDCl<sub>3</sub>) δ 158.1 (d, *J*<sub>C-F</sub> = 232.5 Hz, 1C), 140.1, 137.8, 132.6, 129.2, 128.5, 128.0 (d, *J*<sub>C-F</sub> = 9.8 Hz, 1C), 127.3, 111.4 (d, *J*<sub>C-F</sub> = 9.8 Hz, 1C), 109.5 (d, *J*<sub>C-F</sub> = 26.3 Hz, 1C), 108.7 (d, *J*<sub>C-F</sub> = 4.5 Hz, 1C), 103.5 (d, *J*<sub>C-F</sub> = 23.3 Hz, 1C), 58.4, 57.6, 45.3, 27.4, 18.5, 11.0; HRMS (ESI) *m/z*: calcd for C<sub>20</sub>H<sub>22</sub>FN<sub>2</sub> [M + H]<sup>+</sup> 309.1767, found 309.1764.

### THBC 2n

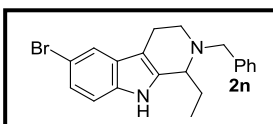

Following **general procedure (IV)**, the reaction of **1n** (80 mg, 0.22 mmol) and Rh(PPh<sub>3</sub>)<sub>3</sub>Cl (10.0 mg, 0.011 mmol) gave after purification by flash column chromatography on silica gel (Et<sub>3</sub>N:EtOAc:heptane; 1:10:89), the title compound as a brown oil (54 mg, 68%). *R*<sub>f</sub> = 0.27 (EtOAc:heptane (1:3); UV; KMnO<sub>4</sub>); HPLC purity: 78% (*R*<sub>t</sub> = 7.00 min); IR (neat) cm<sup>-1</sup>: 3418, 2961, 2928, 1579, 1436, 1312, 1298, 1261, 1207, 792; <sup>1</sup>H NMR (300 MHz, CDCl<sub>3</sub>) δ 7.61 (s, 1H), 7.55 (d, *J* = 1.8 Hz, 1H), 7.34 – 7.07 (m, 7H), 3.73 (d, *J* = 13.6 Hz, 1H), 3.62 (d, *J* = 13.5 Hz, 1H), 3.49 (t, *J* = 6.2 Hz, 1H), 3.13 (ddd, *J* = 10.8, 7.9, 3.8 Hz, 1H), 2.87 – 2.67 (m, 2H), 2.46 (dt, *J* = 8.3, 4.9 Hz, 1H), 1.84 – 1.63 (m, 2H), 0.89 (t, *J* = 7.4 Hz, 3H); <sup>13</sup>C NMR (75 MHz, CDCl<sub>3</sub>) δ 138.6, 135.9, 133.7, 128.3, 128.1, 127.5, 126.3, 119.9, 111.6, 111.3, 106.9, 57.3, 56.5, 53.63, 44.1, 26.2, 17.3; HRMS (ESI) *m/z*: calcd for C<sub>20</sub>H<sub>22</sub>BrN<sub>2</sub> [M + H]<sup>+</sup> 369.0966, found 369.0969

### THBC 2o

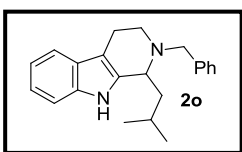

Following **general procedure (IV)**, the reaction of **1o** (200 mg, 0.63 mmol) and Rh(PPh<sub>3</sub>)Cl (87.2 mg, 0.094 mmol) gave after purification by flash column chromatography on silica gel (Et<sub>3</sub>N:MeOH:CH<sub>2</sub>Cl<sub>2</sub>; 1:1:98), the title compound as a brown oil (52 mg, 26%). *R*<sub>f</sub> = 0.21 (EtOAc:heptane (1:9); UV; KMnO<sub>4</sub>); HPLC purity: 71% (*R*<sub>t</sub> = 7.01 min); IR (neat) cm<sup>-1</sup>: 3245, 2950, 2928, 2865, 2841, 1452, 1343, 1300, 1050, 1025, 1006; <sup>1</sup>H NMR (300 MHz, DMSO-*d*<sub>6</sub>) δ 10.67 (s, 1H), 7.40 – 7.20 (m, 7H), 7.05 – 6.98 (m, 1H), 6.94 (td, *J* = 7.1, 0.8 Hz, 1H), 3.75 (d, *J* = 13.2 Hz, 1H), 3.69 – 3.56 (m, 2H), 3.19 – 3.02 (m, 1H), 2.94 – 2.78 (m, 2H), 2.47 – 2.39 (m, 1H), 1.96 – 1.84 (m, 1H), 1.68 (ddd, *J* = 14.0, 10.1, 4.1 Hz, 1H), 1.46 – 1.34 (m, 1H), 0.85 (d, *J* = 6.7 Hz, 3H), 0.66 (d, *J* = 6.5 Hz, 3H); <sup>13</sup>C NMR (75 MHz, DMSO-*d*<sub>6</sub>) δ 139.8, 136.1, 135.7, 128.9, 128.0, 126.8, 126.8, 120.2, 118.0, 117.3, 110.7, 105.2, 56.6, 53.8, 43.5, 43.2, 24.1, 23.6, 21.5, 16.7; HRMS (ESI) *m/z*: calcd for C<sub>21</sub>H<sub>25</sub>N<sub>2</sub> [M + H]<sup>+</sup> 319.2174, found 319.2163

### THBC 2p

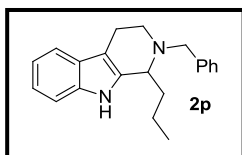

Following **general procedure (IV)**, the reaction of **1p** (150 mg, 0.49 mmol) and **Ru-9** (58.6 mg, 0.074 mmol) gave after purification by flash column chromatography on silica gel (Et<sub>3</sub>N:MeOH:CH<sub>2</sub>Cl<sub>2</sub>; 1:1:98), the title compound as a brown oil (101 mg, 67%). *R<sub>f</sub>* = 0.39 (EtOAc:heptane (1:3); UV; KMnO<sub>4</sub>); HPLC purity: 73% (*R<sub>t</sub>* = 6.67 min); IR (neat) cm<sup>-1</sup>: 3406; 2954, 2929, 1600, 1493, 1452, 1052, 1008; <sup>1</sup>H NMR (300 MHz, CDCl<sub>3</sub>) δ 7.55 (s, 1H), 7.43 (dd, *J* = 7.9, 1.0 Hz, 1H), 7.33 – 7.14 (m, 6H), 7.11 – 6.99 (m, 2H), 3.69 (d, *J* = 4.5 Hz, 2H), 3.60 – 3.50 (m, 1H), 3.22 – 3.12 (m, 1H), 2.91 – 2.76 (m, 2H), 2.56 – 2.44 (m, 1H), 1.77 – 1.52 (m, 2H), 1.51 – 1.29 (m, 2H), 0.78 (t, *J* = 7.3 Hz, 3H); <sup>13</sup>C NMR (75 MHz, CDCl<sub>3</sub>) δ 140.0, 135.9, 135.8, 129.0, 128.3, 127.5, 127.0, 121.4, 119.3, 118.1, 110.8, 107.8, 57.4, 56.5, 44.8, 37.0, 19.6, 18.0, 14.3; HRMS (ESI) *m/z*: calcd for C<sub>21</sub>H<sub>25</sub>N<sub>2</sub> [M + H]<sup>+</sup> 305.2018, found 305.2011.

### THBC 2q

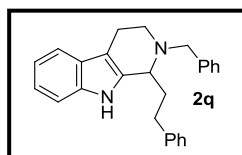

Following **general procedure (IV)**, the reaction of **1q** (150 mg, 0.41 mmol) and Rh(PPh<sub>3</sub>)<sub>3</sub>Cl (18.9 mg, 0.0204 mmol) gave after purification by flash column chromatography on silica gel (Et<sub>3</sub>N:MeOH:CH<sub>2</sub>Cl<sub>2</sub>; 1:1:98), the title compound as a brown oil (98 mg, 65%). *R<sub>f</sub>* = 0.20 (EtOAc:heptane (1:9); UV; KMnO<sub>4</sub>); HPLC purity: 93% (*R<sub>t</sub>* = 7.35 min); IR (neat) cm<sup>-1</sup>: 3402, 3227, 2934, 2842, 1494, 1452, 1050, 1034, 1006; <sup>1</sup>H NMR (500 MHz, DMSO-*d*<sub>6</sub>) δ 10.71 (s, 1H), 7.46 – 7.31 (m, 5H), 7.31 – 7.18 (m, 3H), 7.14 (d, *J* = 7.7 Hz, 3H), 7.02 (t, *J* = 7.4 Hz, 1H), 6.95 (t, *J* = 7.3 Hz, 1H), 3.80 (d, *J* = 13.5 Hz, 1H), 3.70 (dd, *J* = 8.2, 4.9 Hz, 2H), 3.15 (ddd, *J* = 14.1, 9.0, 4.8 Hz, 1H), 2.87 – 2.74 (m, 2H), 2.65 (t, *J* = 7.2 Hz, 2H), 2.52 – 2.48 (m, 1H), 2.23 – 1.94 (m, 2H); <sup>13</sup>C NMR (75 MHz, DMSO-*d*<sub>6</sub>) δ 142.4, 139.7, 135.9, 135.4, 128.7, 128.3, 128.2, 128.2, 126.8, 126.8, 125.5, 120.4, 118.1, 117.5, 110.9, 106.3, 56.7, 56.4, 44.6, 35.2, 31.6, 17.8; HRMS (ESI) *m/z*: calcd for C<sub>26</sub>H<sub>27</sub>N<sub>2</sub> [M + H]<sup>+</sup> 367.2174, found 367.2170.

### THBC 2r

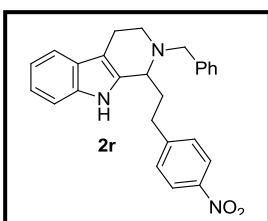

Following **general procedure (IV)**, the reaction of **1r** (150 mg, 0.36 mmol) and Rh(PPh<sub>3</sub>)<sub>3</sub>Cl (50.6 mg, 0.055 mmol) gave after purification by flash column chromatography on silica gel (Et<sub>3</sub>N:EtOAc:heptane; 1:10:89), the title compound as a brown oil (65 mg, 43%). *R<sub>f</sub>* = 0.27 (EtOAc:heptane (1:3); UV; KMnO<sub>4</sub>); HPLC purity: 82% (*R<sub>t</sub>* = 7.37 min); IR (neat) cm<sup>-1</sup>: 3406, 2938, 2840, 1598, 1512, 1450, 1299, 1007; <sup>1</sup>H NMR (300 MHz, CDCl<sub>3</sub>) δ 8.00 – 7.97 (m, 1H), 7.97 – 7.93 (m, 1H), 7.56 (s, 1H), 7.44 (d, *J* = 8.5 Hz, 1H), 7.35 – 7.19 (m, 7H), 7.11 – 6.99 (m, 4H), 3.70 (s, 2H), 3.59 (dd, *J* = 8.7, 3.8 Hz, 1H), 3.28 – 3.15 (m, 1H), 3.00 – 2.62 (m, 5H), 2.60 – 2.47 (m, 1H), 2.12 – 1.86 (m, 3H); <sup>13</sup>C NMR (75 MHz, CDCl<sub>3</sub>) δ 150.8, 146.4, 136.2, 129.5, 129.4, 128.7, 127.5, 127.4, 123.8, 121.9, 119.7, 118.4, 111.1, 108.4, 57.6, 55.9, 45.3, 36.0, 32.3, 18.1; HRMS (ESI) *m/z*: calcd for C<sub>26</sub>H<sub>26</sub>N<sub>3</sub>O<sub>2</sub> [M + H]<sup>+</sup> 412.2025, found 412.2019.

### THBC 2s



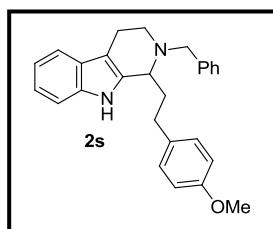

Following **general procedure (IV)**, the reaction of **1s** (250 mg, 0.63 mmol) and Rh(PPh<sub>3</sub>)<sub>3</sub>Cl (87.5 mg, 0.095 mmol) gave after purification by flash column chromatography on silica gel (Et<sub>3</sub>N:MeOH:CH<sub>2</sub>Cl<sub>2</sub>; 1:1:98), the title compound as a brown oil (97 mg, 39%). R<sub>f</sub> = 0.26 (EtOAc:heptane (1:3); UV; KMnO<sub>4</sub>); HPLC purity: 90% (R<sub>t</sub> = 7.35 min); IR (neat) cm<sup>-1</sup>: 3409, 2932, 2836, 1609, 1510, 1254, 1298, 1232, 1175, 1009; <sup>1</sup>H NMR (500 MHz, DMSO-*d*<sub>6</sub>) δ 10.69 (s, 1H), 7.42 – 7.33 (m, 5H), 7.27 (dd, *J* = 7.5, 4.0 Hz, 2H), 7.04 (d, *J* = 8.6 Hz, 2H), 7.00 (d, *J* = 7.4 Hz, 1H), 6.94 (t, *J* = 7.4 Hz, 1H), 6.79 (d, *J* = 8.5 Hz, 2H), 3.78 (d, *J* = 13.6 Hz, 1H), 3.73 – 3.64 (m, 5H), 3.13 (ddd, *J* = 14.2, 9.2, 4.8 Hz, 1H), 2.84 – 2.73 (m, 2H), 2.58 (t, *J* = 7.7 Hz, 2H), 2.52 – 2.47 (m, 1H), 2.09 – 1.99 (m, 2H); <sup>13</sup>C NMR (75 MHz, DMSO-*d*<sub>6</sub>) δ 157.2, 139.7, 135.9, 135.5, 134.2, 129.1, 128.7, 128.1, 126.8, 126.6, 120.3, 118.1, 117.4, 113.6, 110.8, 106.2, 56.7, 56.3, 54.8, 44.5, 35.5, 30.7, 17.8; HRMS (ESI) *m/z*: calcd for C<sub>27</sub>H<sub>29</sub>N<sub>2</sub>O [M + H]<sup>+</sup> 397.2280, found 397.2276.

## Synthesis of THBC 2o

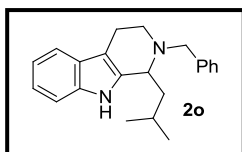

In a Schlenk tube fitted with a magnetic stirring bar and a reflux condenser, freshly titrated *n*-BuLi (0.57 mmol, 36.2 mg, 1.1 M in hexanes, 514  $\mu$ L) was added to a suspension of Rh(PPh<sub>3</sub>)<sub>3</sub>Cl (261 mg, 0.28 mmol) in toluene (4.2 mL). The mixture was stirred for 20 min at rt, after which a solution of **1o** (300 mg, 0.94 mmol) in toluene (4.2 mL) was added. The reaction was stirred at reflux and was monitored by TLC. After 23 hours, the reaction mixture was filtered through a pad of celite, which was washed with CH<sub>2</sub>Cl<sub>2</sub> (2 x 20 mL). The filtrate was evaporated *in vacuo*, and the residue was purified by flash column chromatography on silica gel (Et<sub>3</sub>N:EtOAc:heptane; 1:10:89), to give the title compound as a yellow oil (152 mg, 51%).

## Synthesis of THBC 2a: One-Pot Reaction

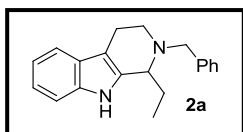

In a Schlenk tube fitted with a magnetic stirring bar and a reflux condenser, allyl bromide (16 mg, 11.4  $\mu\text{L}$ , 0.13 mmol) was added to a stirred suspension of *N*-benzyltryptamine (30 mg, 0.12 mmol) and  $\text{K}_2\text{CO}_3$  (23 mg, 0.17 mmol) in toluene (1.1 mL). The reaction was stirred at reflux and was monitored by TLC. Upon full conversion of the starting material (16 h),  $\text{Rh}(\text{PPh}_3)_3\text{Cl}$  (16.6 mg, 0.018 mmol) was added. After further 2 h of stirring, the reaction mixture was filtered through a pad of celite, which was washed with  $\text{CH}_2\text{Cl}_2$  (2 x 5 mL). The filtrate was evaporated *in vacuo*, and the residue was purified by flash column chromatography on silica gel ( $\text{Et}_3\text{N}:\text{EtOAc}:\text{heptane}$ ; 1:10:89), to give the title compound as a yellow oil (25 mg, 71%).

## Synthesis of THBCs 2a-e and 2j: Pd-Catalyzed Tandem Tsuji-Trost Allylation/Isomerization/Cyclization

**General procedure V:** Synthesis of THBCs via Pd-catalyzed Tsuji-Trost /isomerization/ cyclization sequence

### THBC 2a

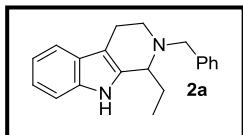

In a Schlenk tube fitted with a magnetic stirring bar and a reflux condenser, *N*-benzyltryptamine (48 mg, 0.19 mmol) was dissolved in toluene (1.6 ml). Allylmethylcarbonate (18.6 mg, 18.2  $\mu$ l, 0.16 mmol) was added, followed by  $\text{Pd}(\text{PPh}_3)_4$  (28.0 mg, 0.024 mmol). The reaction was stirred at reflux and was monitored by TLC. After 4 h, the reaction was cooled to room temperature and transferred to column chromatography for purification on silica gel (EtOAc:hexanes; 1:3), to give the title compound (40 mg, 85%).

### THBC 2b

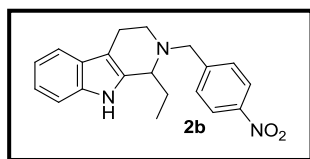

Following **general procedure (V)**, the reaction of *N*-(4-nitro)benzyltryptamine (61.0 mg, 0.20 mmol), allylcarbonate (20 mg, 19.6  $\mu$ l, 0.17 mmol), and  $\text{Pd}(\text{PPh}_3)_4$  (59 mg, 0.051 mmol), gave after purification by flash column chromatography on silica gel (EtOAc:hexanes; 1:6), the title compound (49 mg, 86%).

### THBC 2c

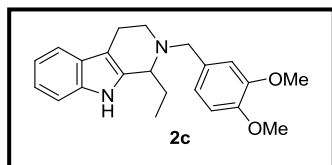

Following **general procedure (V)**, the reaction of *N*-(3,4-dimethoxy)benzyltryptamine (64.0 mg, 0.20 mmol), allylcarbonate (20 mg, 19.6  $\mu$ l, 0.17 mmol), and  $\text{Pd}(\text{PPh}_3)_4$  (59 mg, 0.051 mmol), gave after purification by flash column chromatography on silica gel (EtOAc:hexanes; 1:1), the title compound (49 mg, 81%).

### THBC 2d

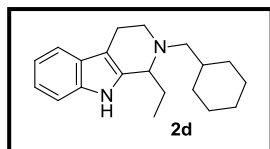

Following **general procedure (V)**, the reaction of *N*-cyclohexylmethyltryptamine (53.0 mg, 0.20 mmol), allylcarbonate (20 mg, 19.6  $\mu$ l, 0.17 mmol), and  $\text{Pd}(\text{PPh}_3)_4$  (59 mg, 0.051 mmol), gave after purification by flash column chromatography on silica gel (EtOAc:hexanes; 1:8), the title compound (34 mg, 67%).

### THBC 2e

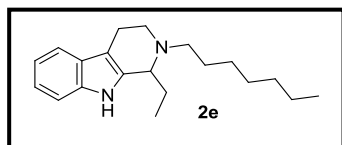

mg, 48%).

Following **general procedure (V)**, the reaction of *N*-heptyltryptamine (53.3 mg, 0.20 mmol), allylcarbonate (20 mg, 19.6  $\mu$ l, 0.17 mmol), and  $\text{Pd}(\text{PPh}_3)_4$  (59 mg, 0.051 mmol), gave after purification by flash column chromatography on silica gel (EtOAc:hexanes; 1:2), the title compound (25

### THBC 2j.

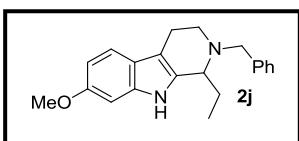

(37 mg, 67%).

Following **general procedure (V)**, the reaction of *N*-benzyl-(6-methoxy)tryptamine (56.0 mg, 0.20 mmol), allylcarbonate (20 mg, 19.6  $\mu$ l, 0.17 mmol), and  $\text{Pd}(\text{PPh}_3)_4$  (29.0 mg, 0.025 mmol), gave after purification by flash column chromatography on silica gel (EtOAc:hexanes; 1:6), the title compound

## RP-HPLC Chromatograms, IR, $^1\text{H}$ -, and $^{13}\text{C}$ NMR Spectra for all Compounds

### *N*-Benzyl-allylamine

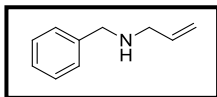

### RP-HPLC of *N*-benzyl-allylamine

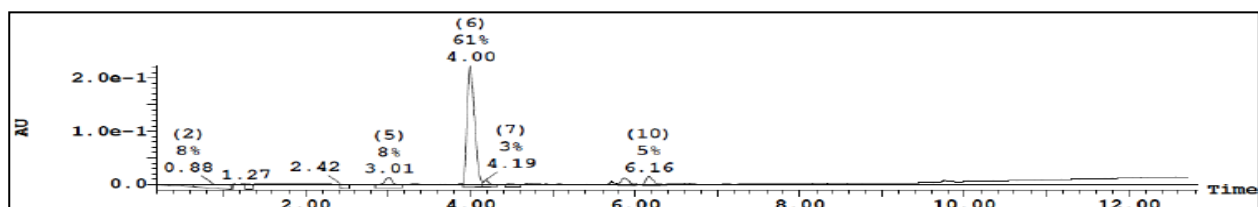

**$^1\text{H}$  NMR of *N*-benzyl-allylamine**

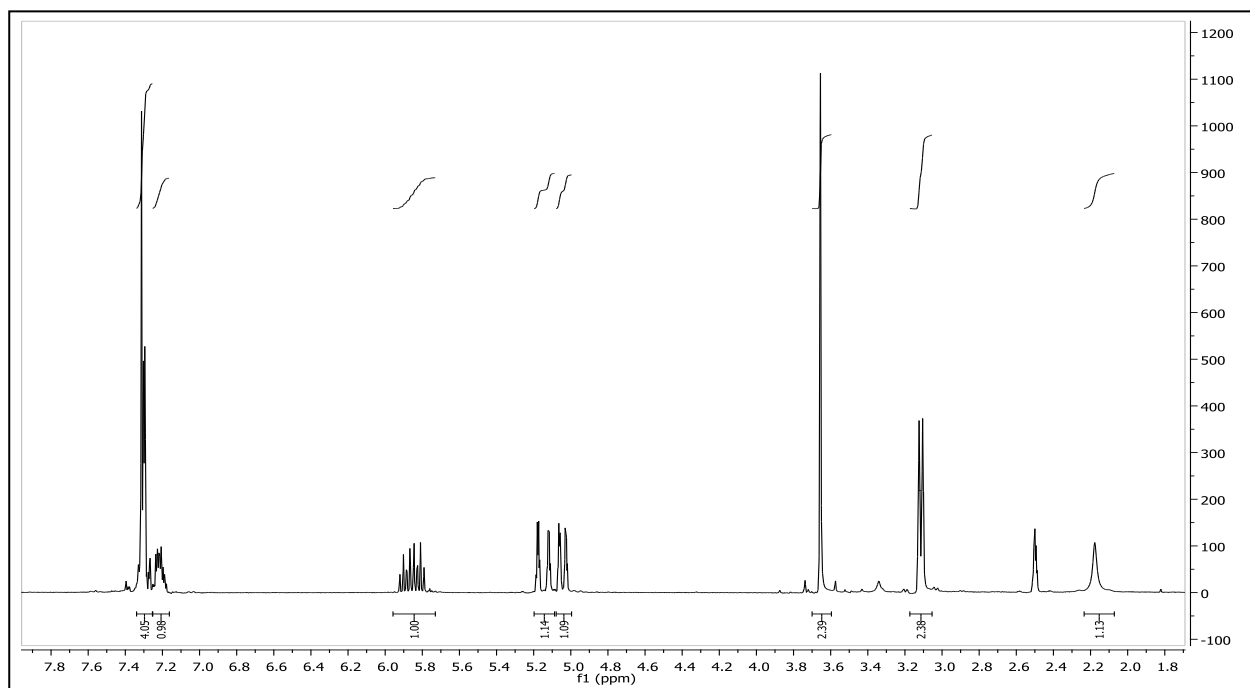

**$^{13}\text{C}$  NMR of *N*-benzyl-allylamine**

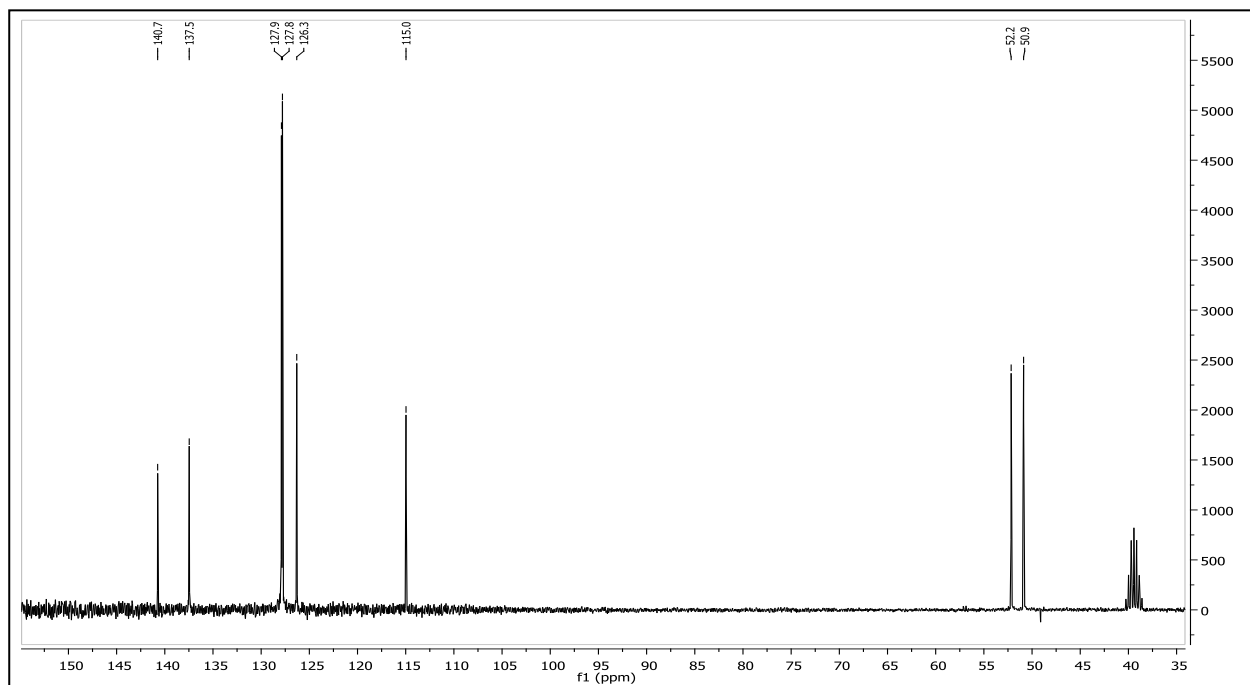

***N*-Benzyltryptamine (3a)**

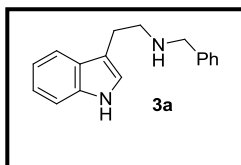

**RP-HPLC of *N*-benzyltryptamine (3a)**

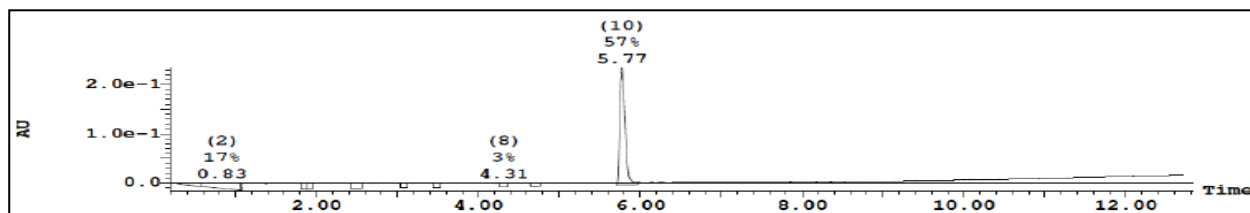



### <sup>1</sup>H NMR of *N*-benzyltryptamine (3a)

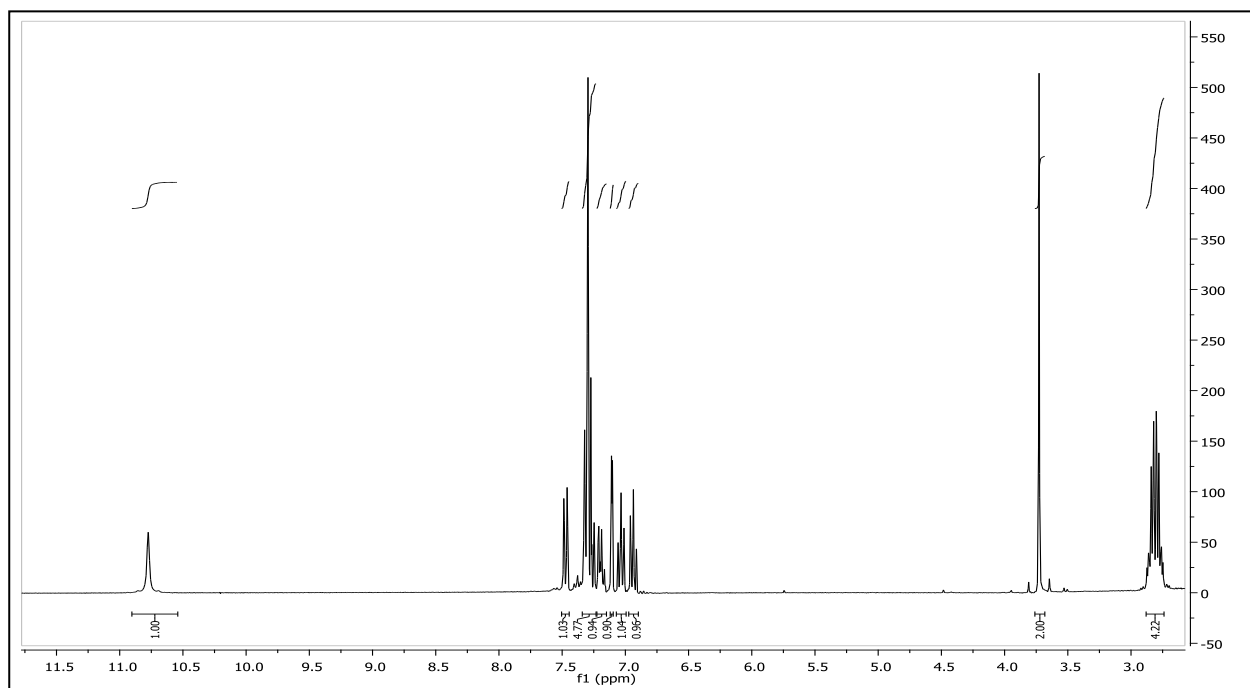

### <sup>13</sup>C NMR of *N*-benzyltryptamine (3a)

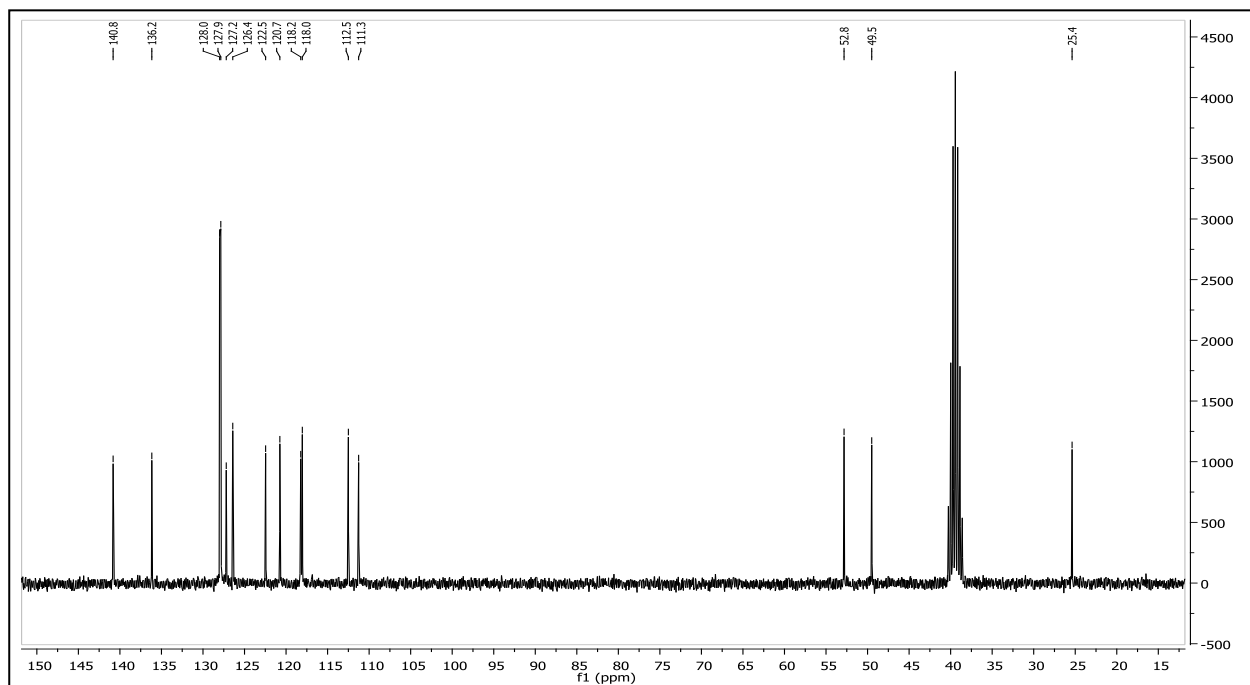

### *N*-(4-Nitro)benzyltryptamine (3b)

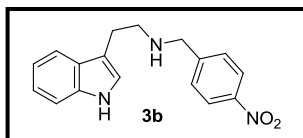

### RP-HPLC of *N*-(4-nitro)benzyltryptamine (3b)

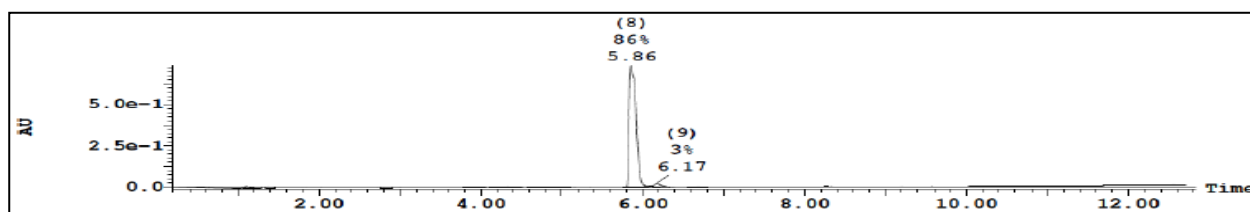

### IR of *N*-(4-nitro)benzyltryptamine (3b)

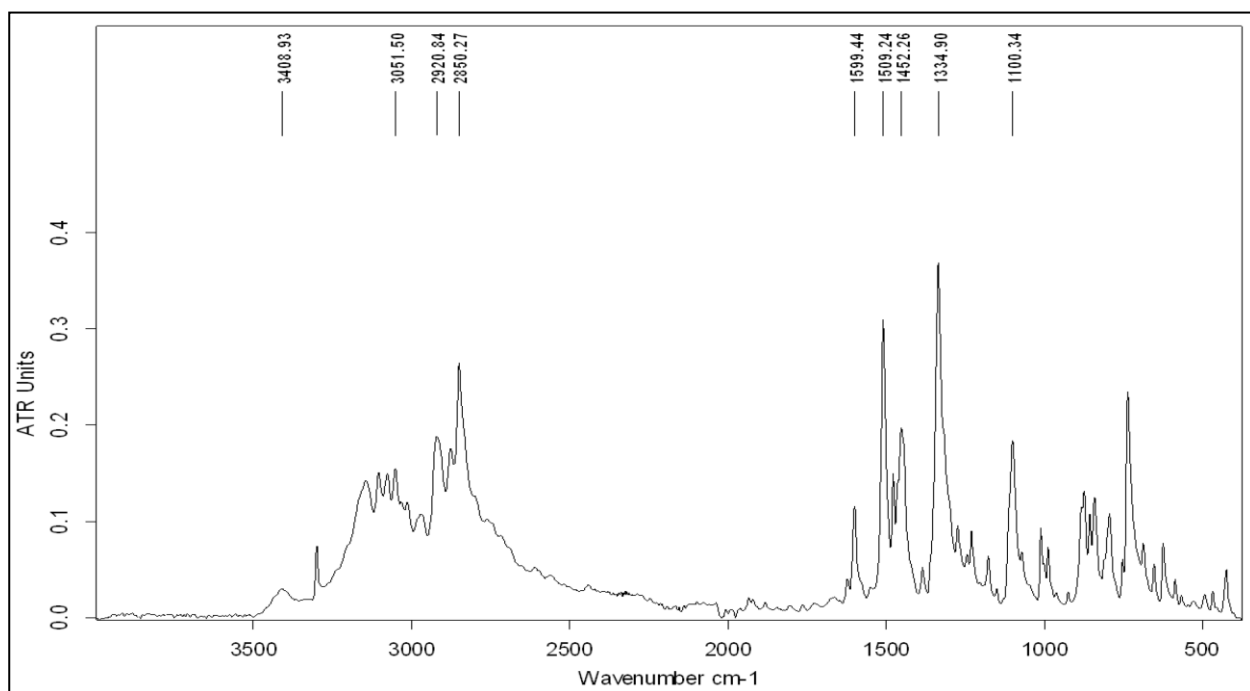

**<sup>1</sup>H NMR of *N*-(4-nitro)benzyltryptamine (3b)**

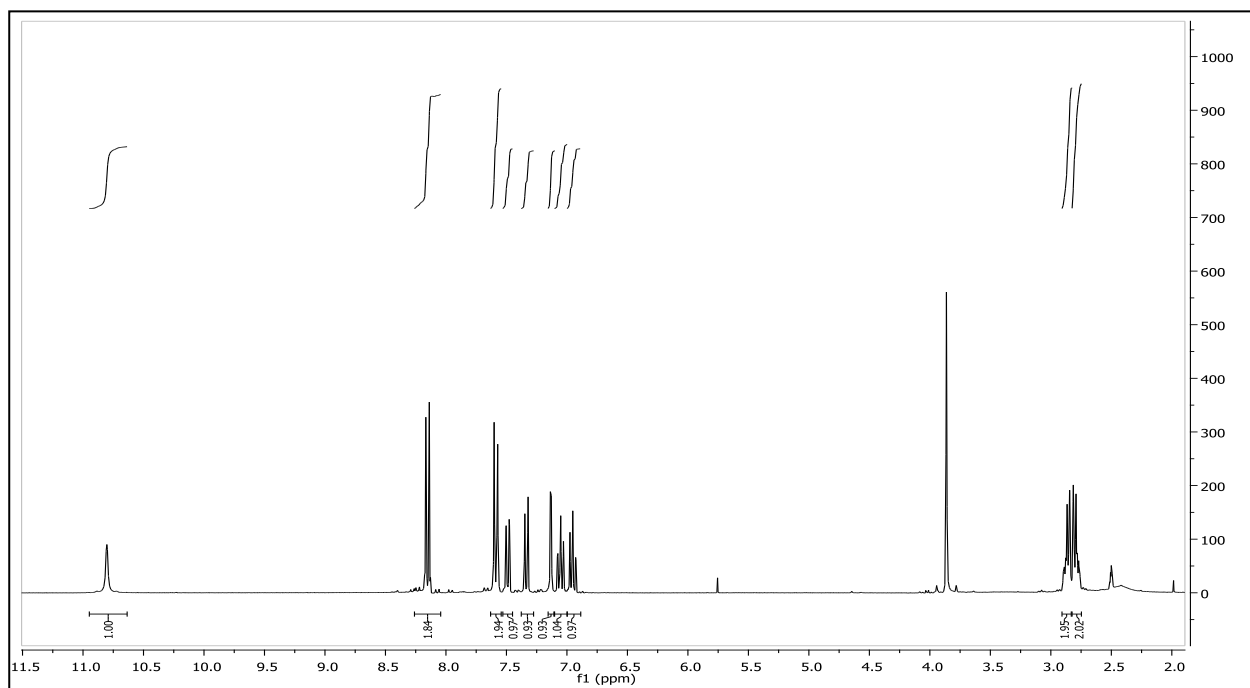

**<sup>13</sup>C NMR of *N*-(4-nitro)benzyltryptamine (3b)**

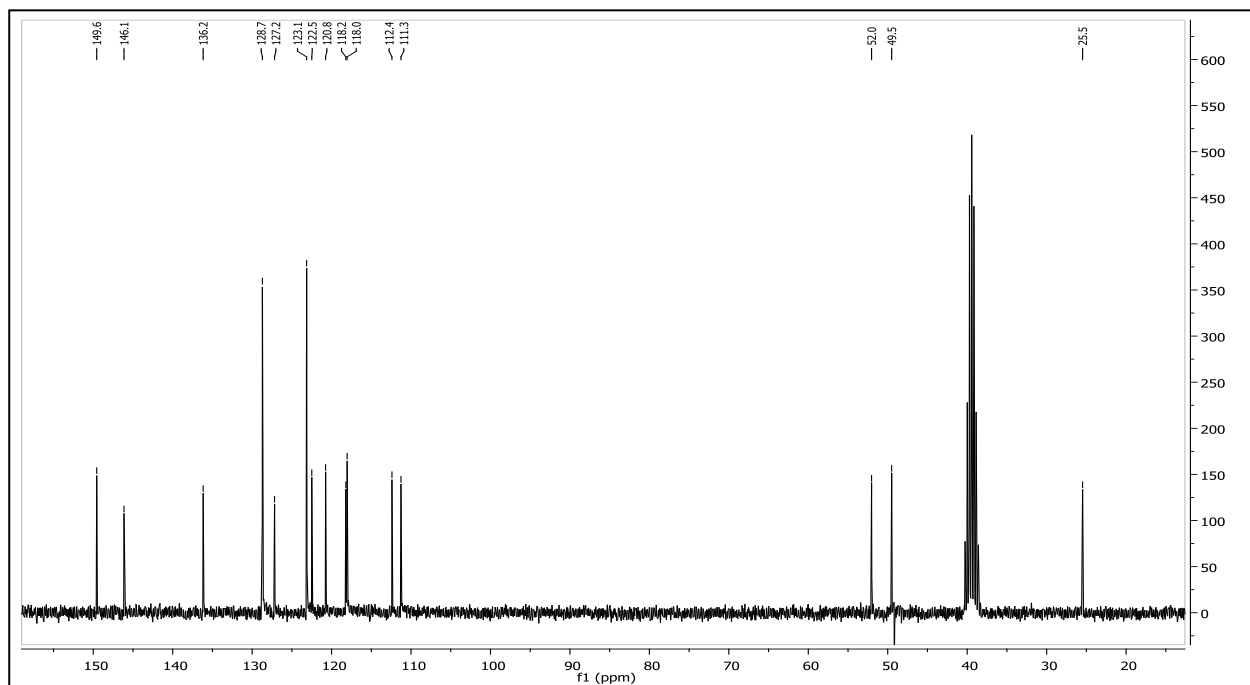

***N*-(3,4-Dimethoxy)benzyltryptamine (3c)**

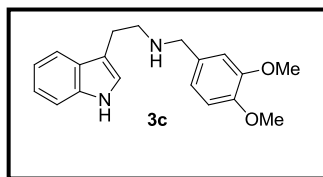

**RP-HPLC of *N*-(3,4-dimethoxy)benzyltryptamine (3c)**

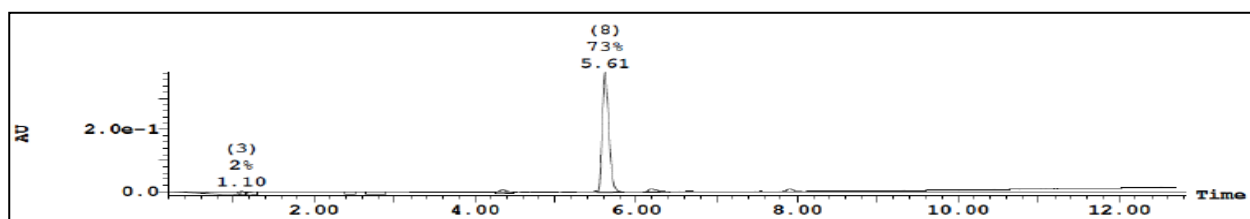

**IR of *N*-(3,4-dimethoxy)benzyltryptamine (3c)**

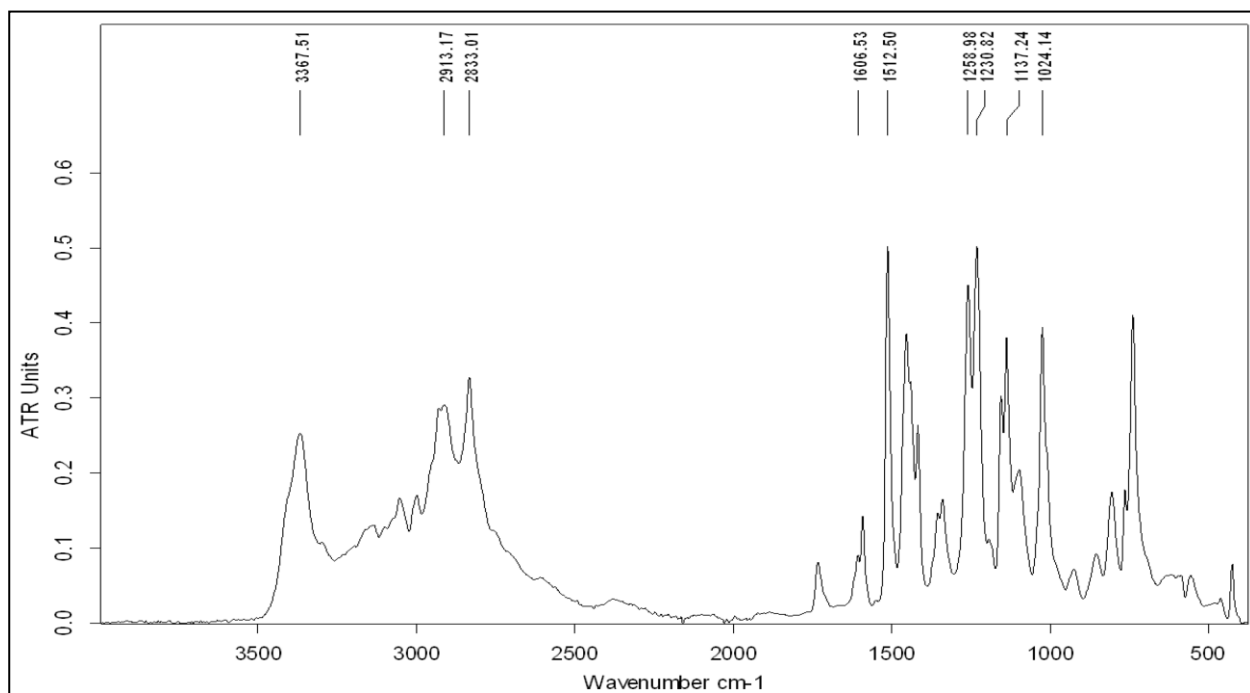

**<sup>1</sup>H NMR of *N*-(3,4-dimethoxy)benzyltryptamine (3c)**

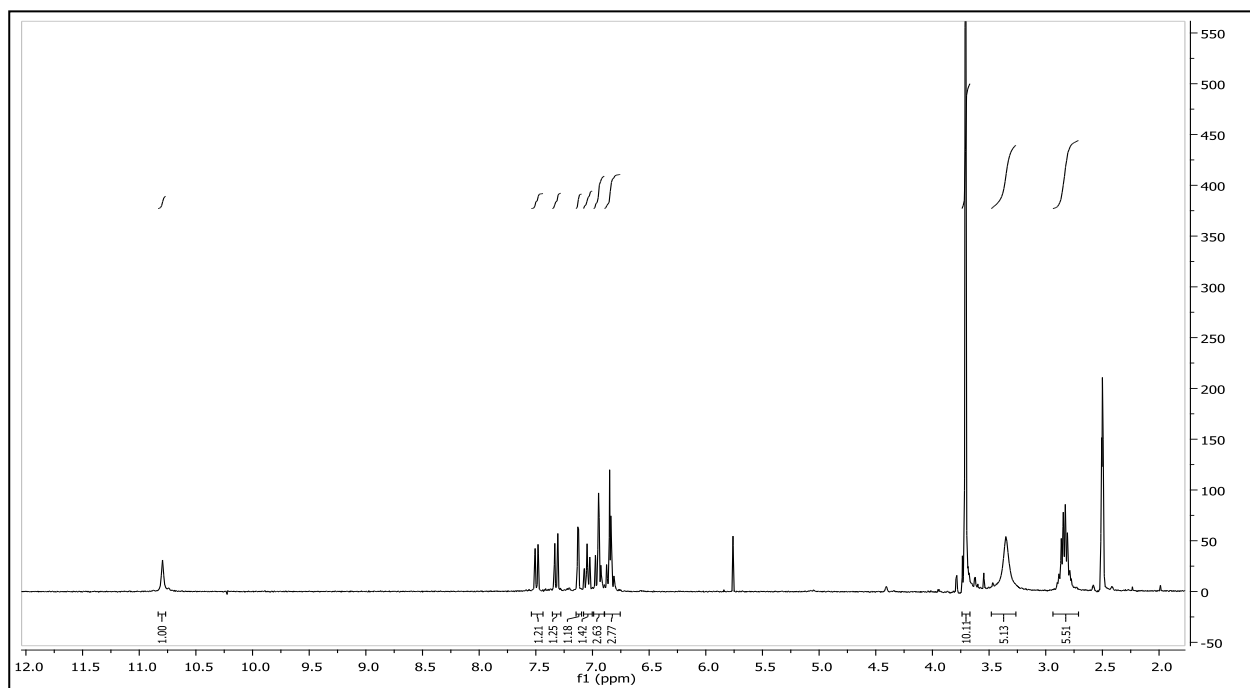

**<sup>13</sup>C NMR of *N*-(3,4-dimethoxy)benzyltryptamine (3c)**

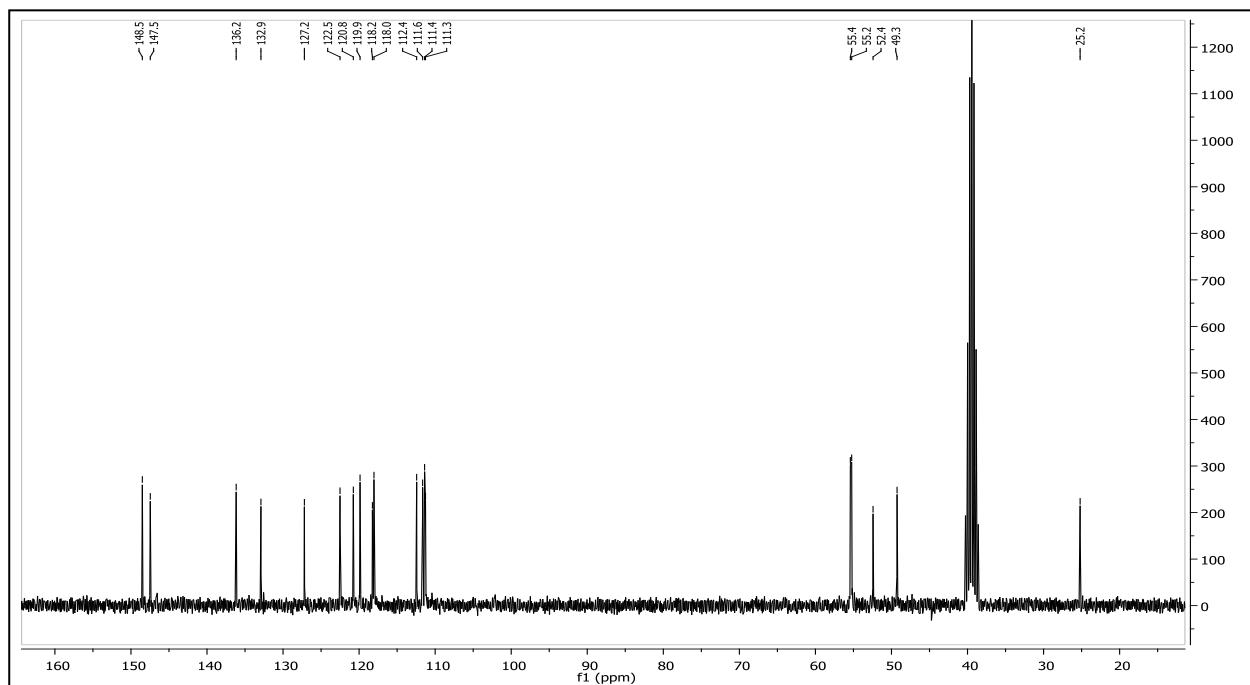

### ***N*-Cyclohexylmethyltryptamine (3d)**

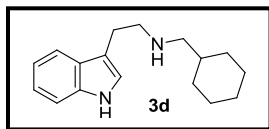

### **RP-HPLC of *N*-cyclohexylmethyltryptamine (3d)**

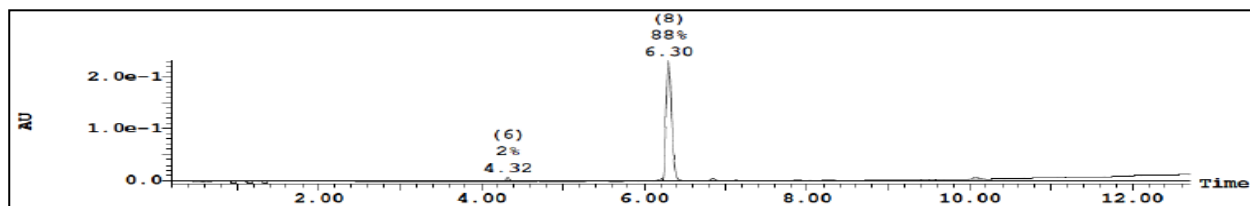

### **IR of *N*-cyclohexylmethyltryptamine (3d)**

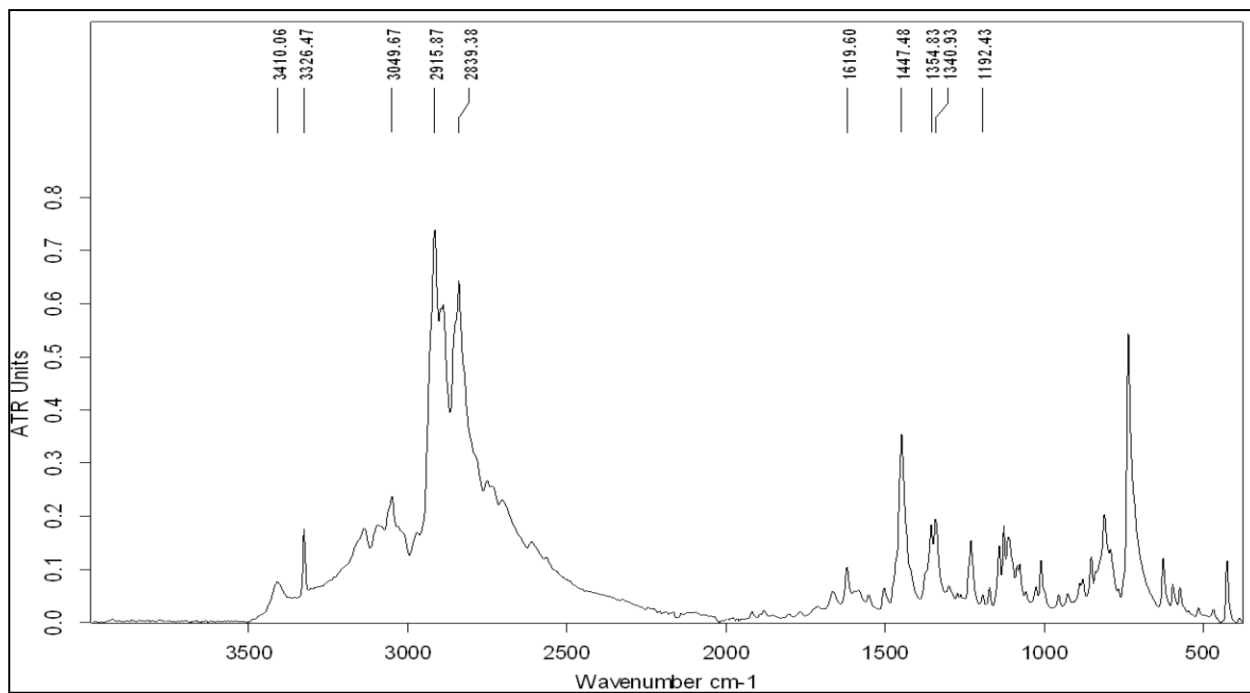

**<sup>1</sup>H NMR of *N*-cyclohexylmethyltryptamine (3d)**

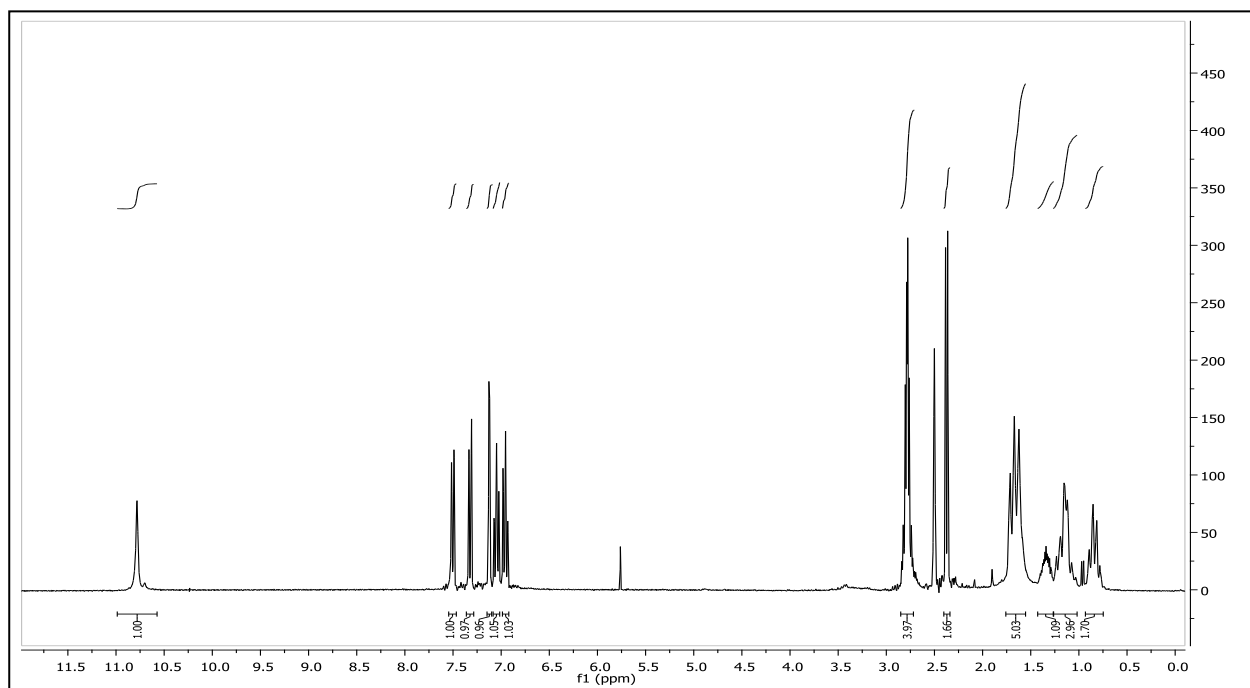

**<sup>13</sup>C NMR of *N*-cyclohexylmethyltryptamine (3d)**

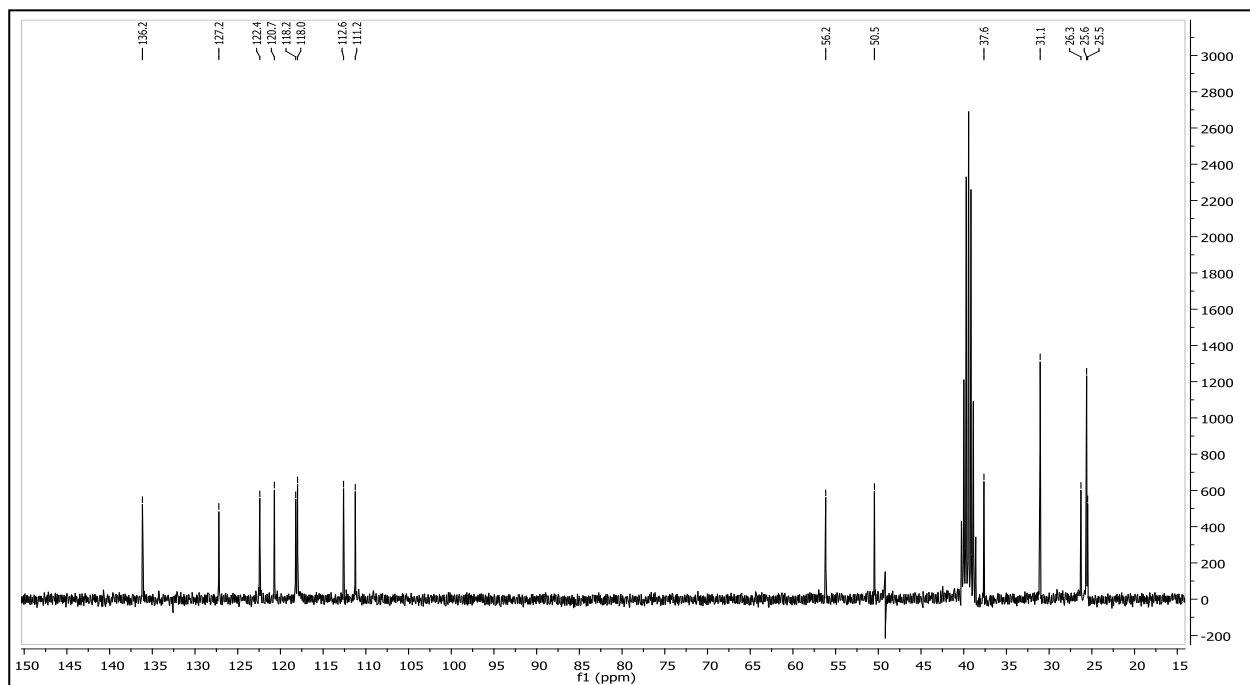

### *N*-Heptyltryptamine (3e)

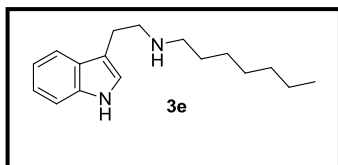

### RP-HPLC of *N*-heptyltryptamine (3e)

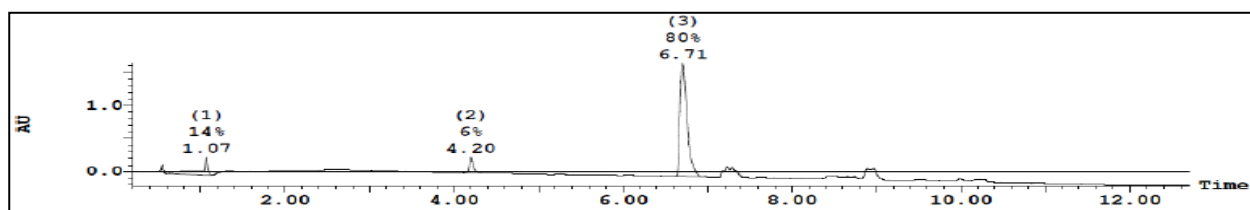

### IR of *N*-heptyltryptamine (3e)

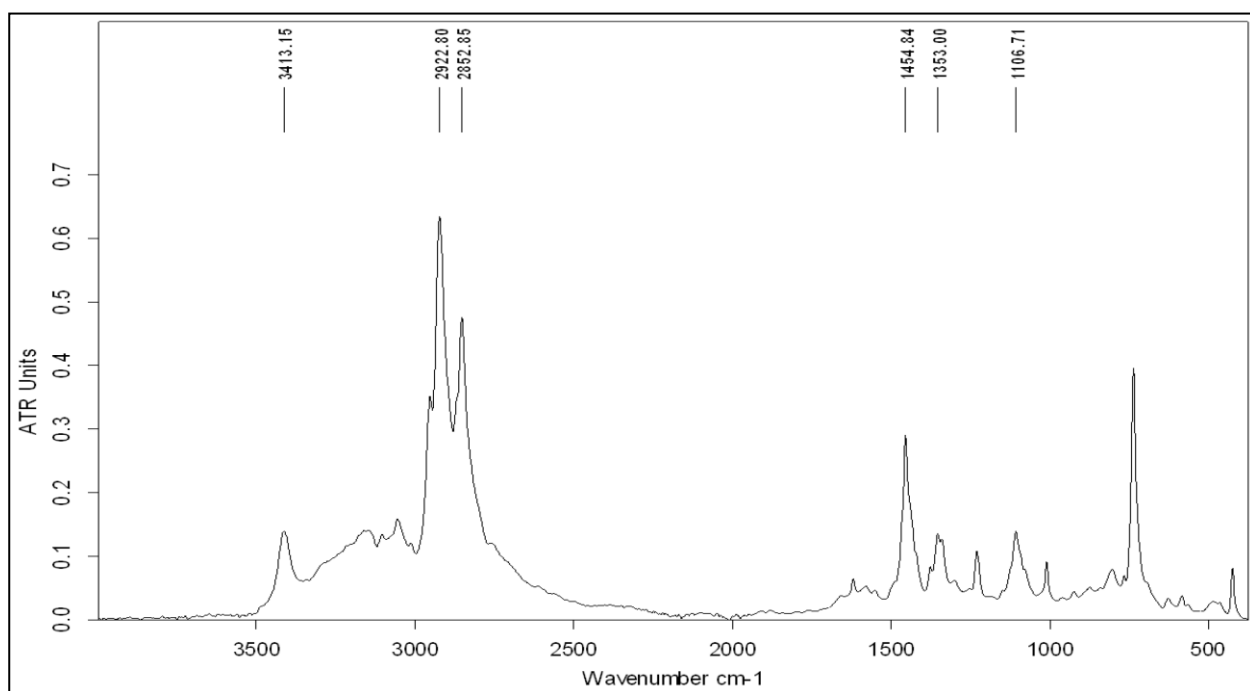



**<sup>1</sup>H NMR of *N*-heptyltryptamine (3e)**

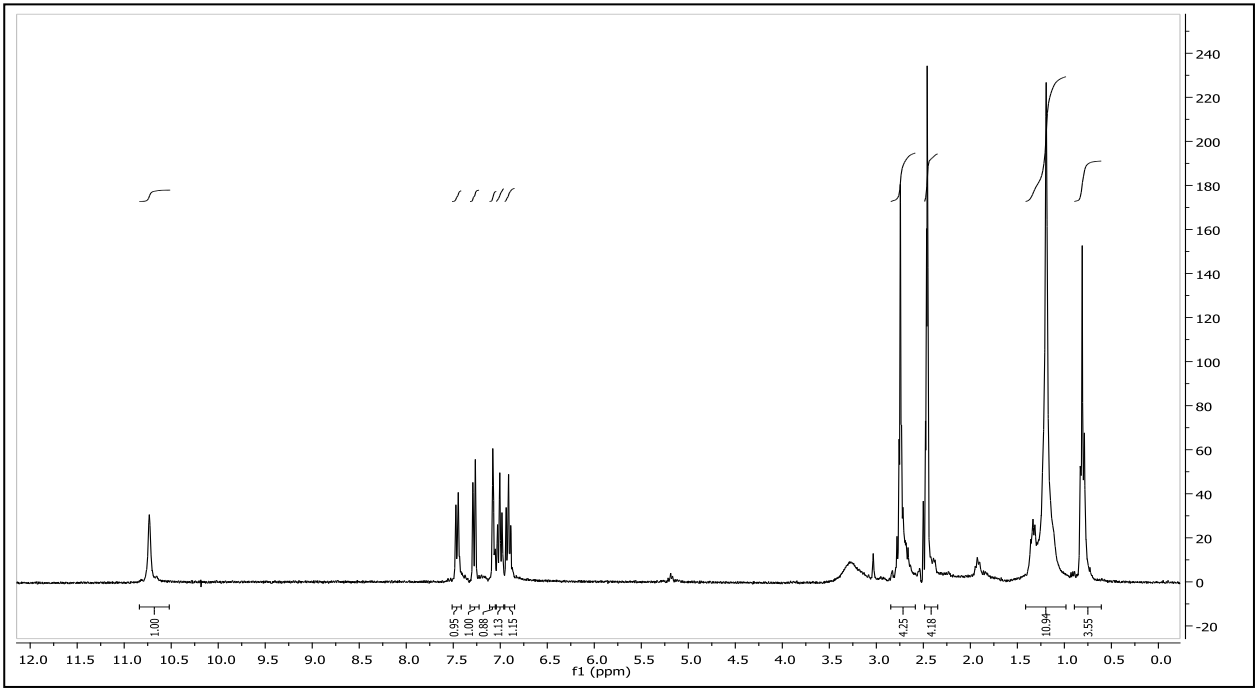

**<sup>13</sup>C NMR of *N*-heptyltryptamine (3e)**

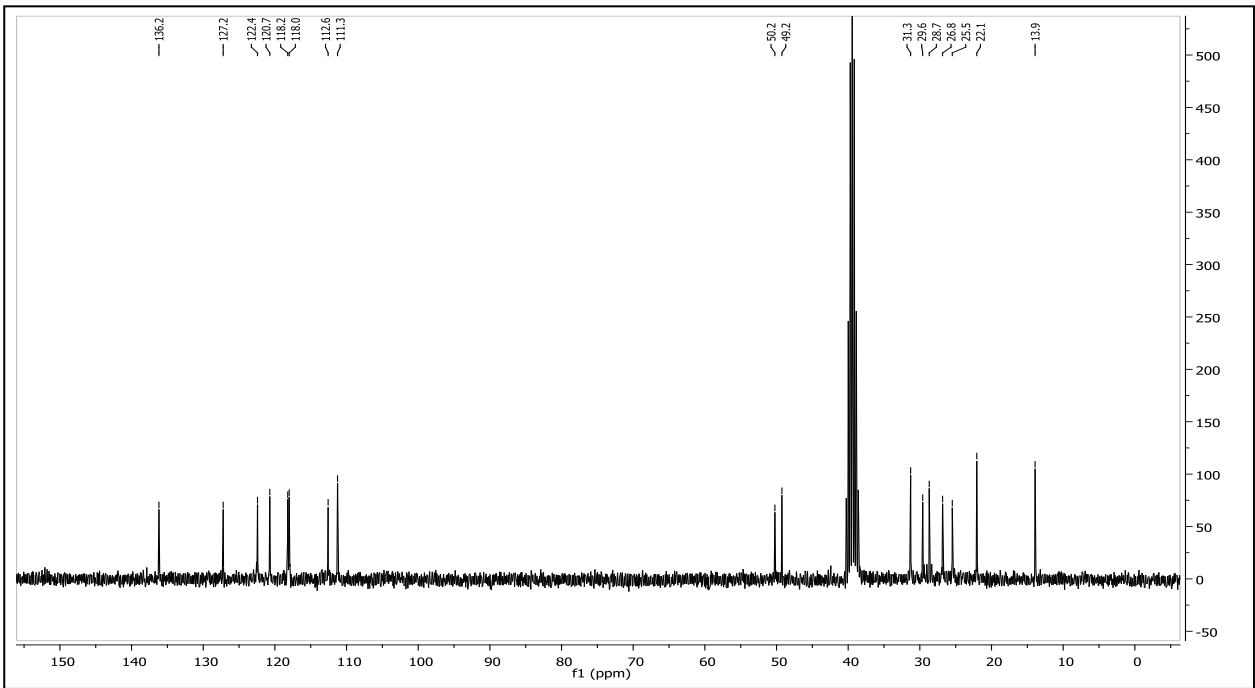

### *N*-Allyltryptamine

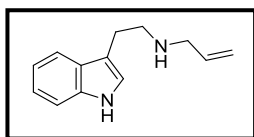

### RP-HPLC of *N*-allyltryptamine

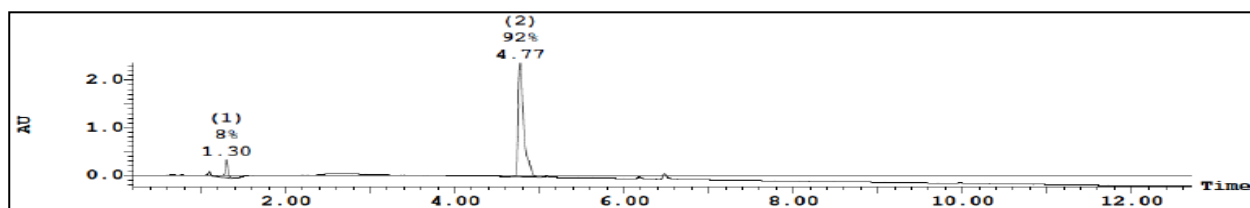

# **<sup>1</sup>H NMR of *N*-allyltryptamine**

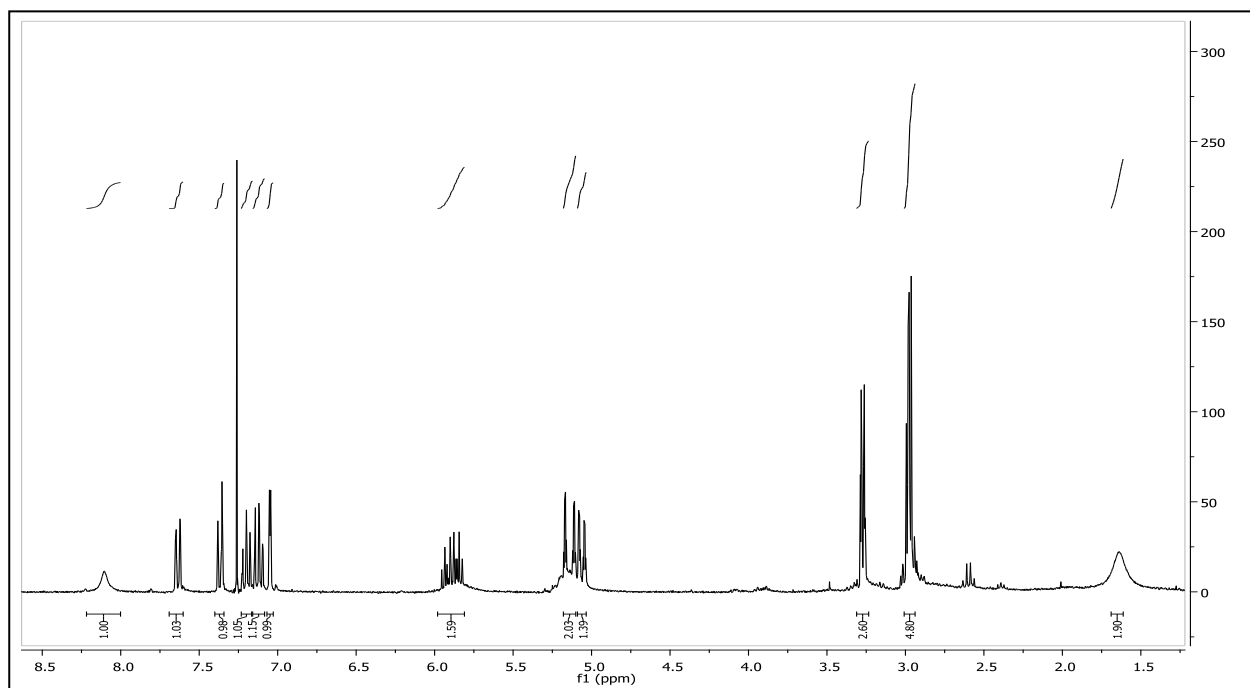

# **<sup>13</sup>C NMR of *N*-Allyltryptamine**

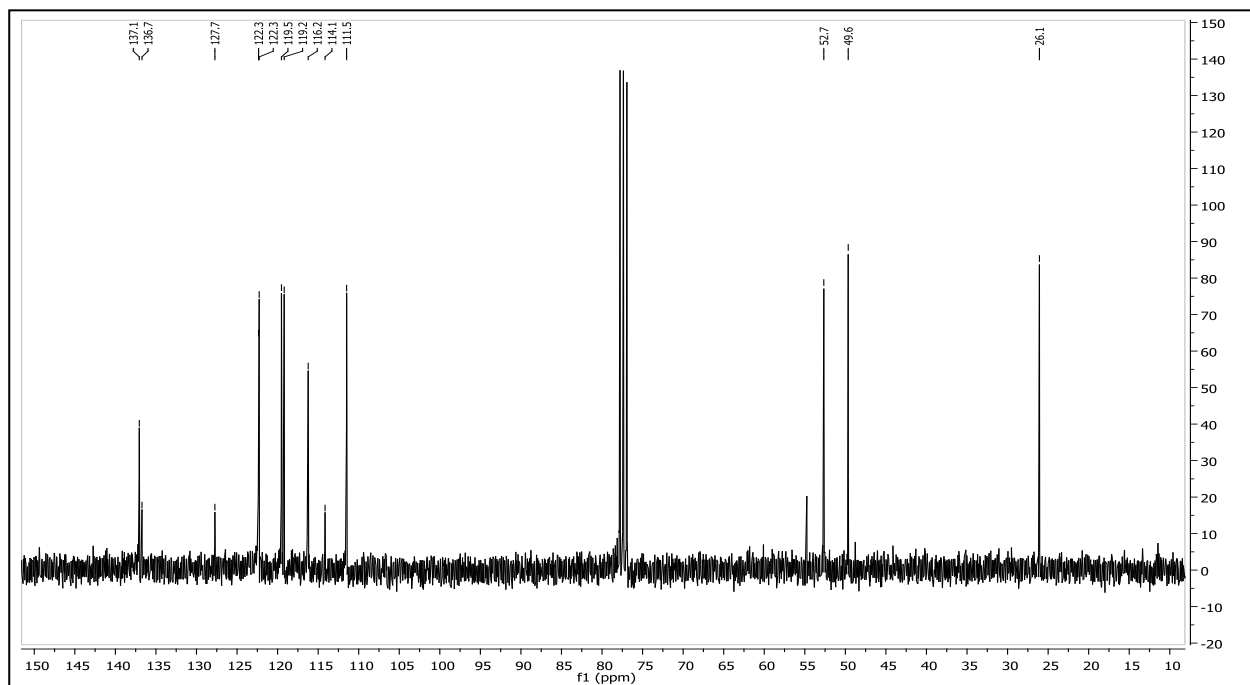

### ***N*-Phenyltryptamine**

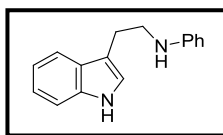

### **RP-HPLC of *N*-phenyltryptamine**

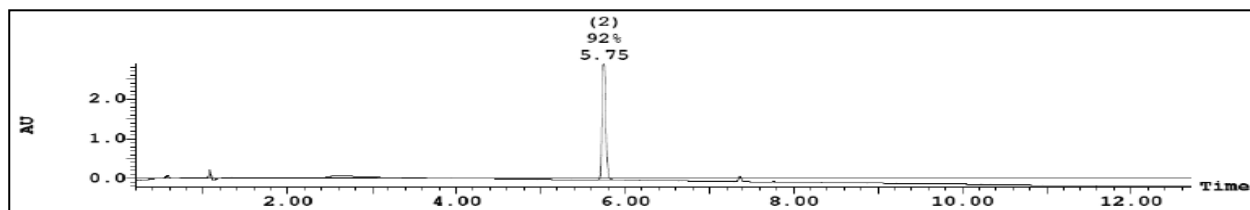

### $^1\text{H}$ NMR of *N*-phenyltryptamine

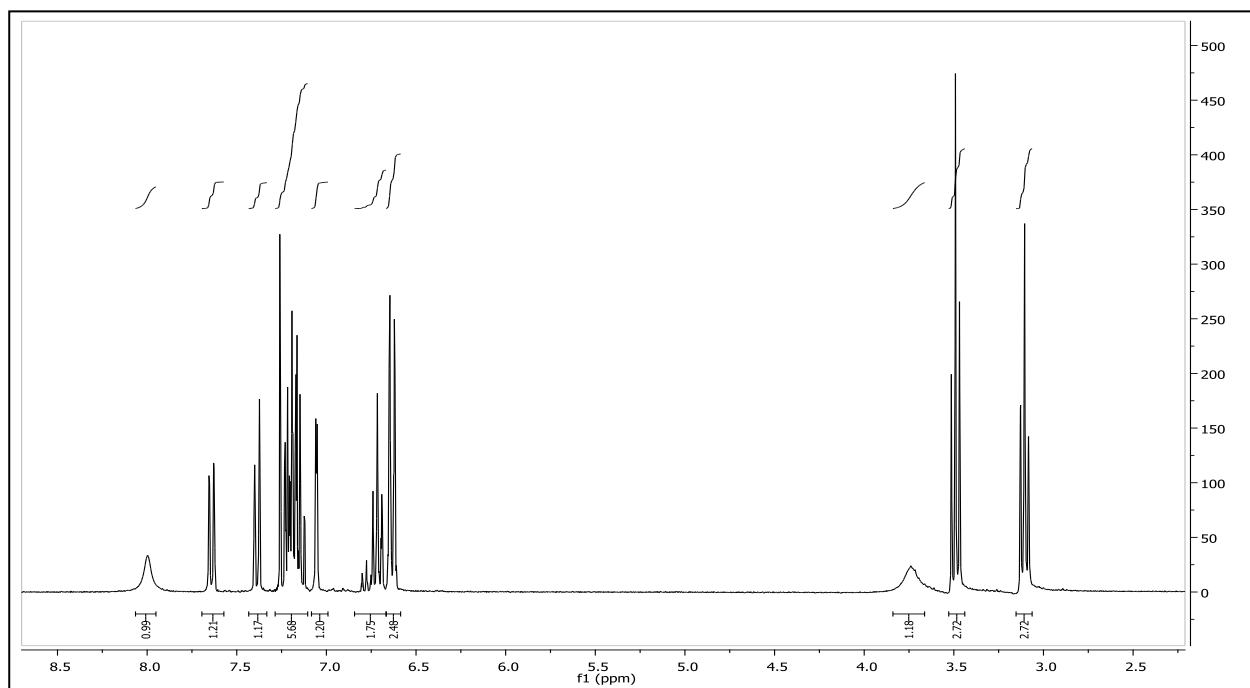

### $^{13}\text{C}$ NMR of *N*-phenyltryptamine

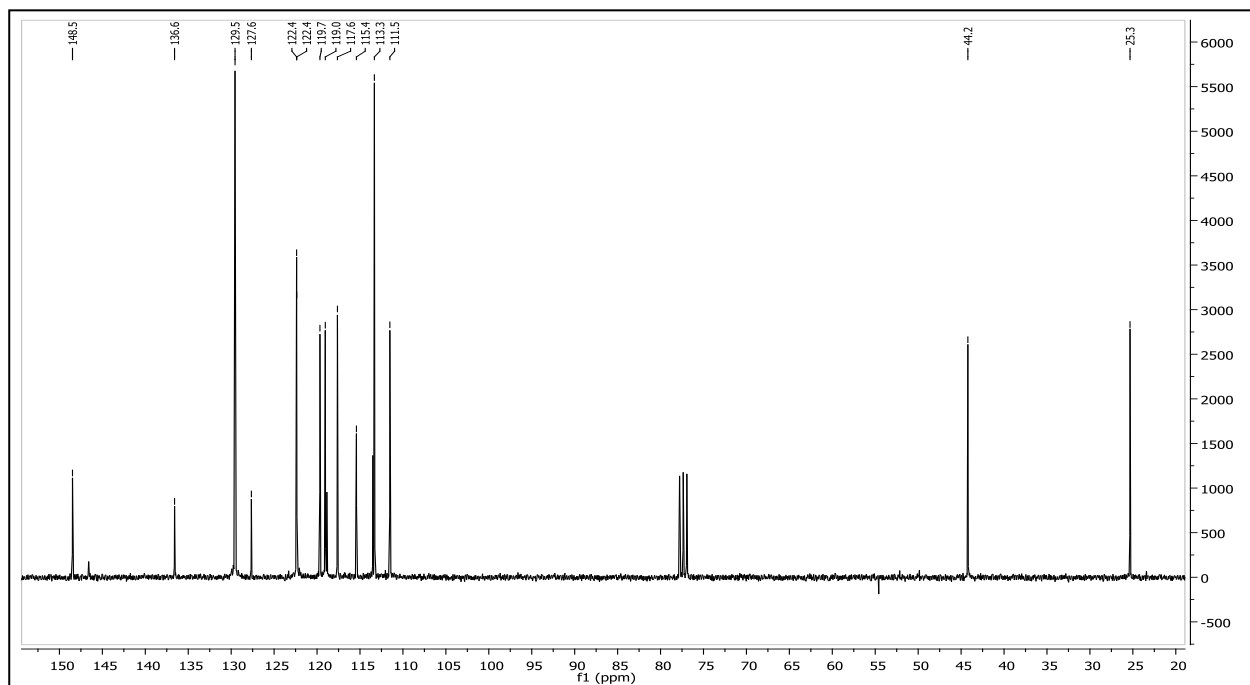

***N*-Benzyl-(5-methoxy)tryptamine**

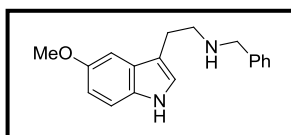

**<sup>1</sup>H NMR of *N*-benzyl-(5-methoxy)tryptamine**

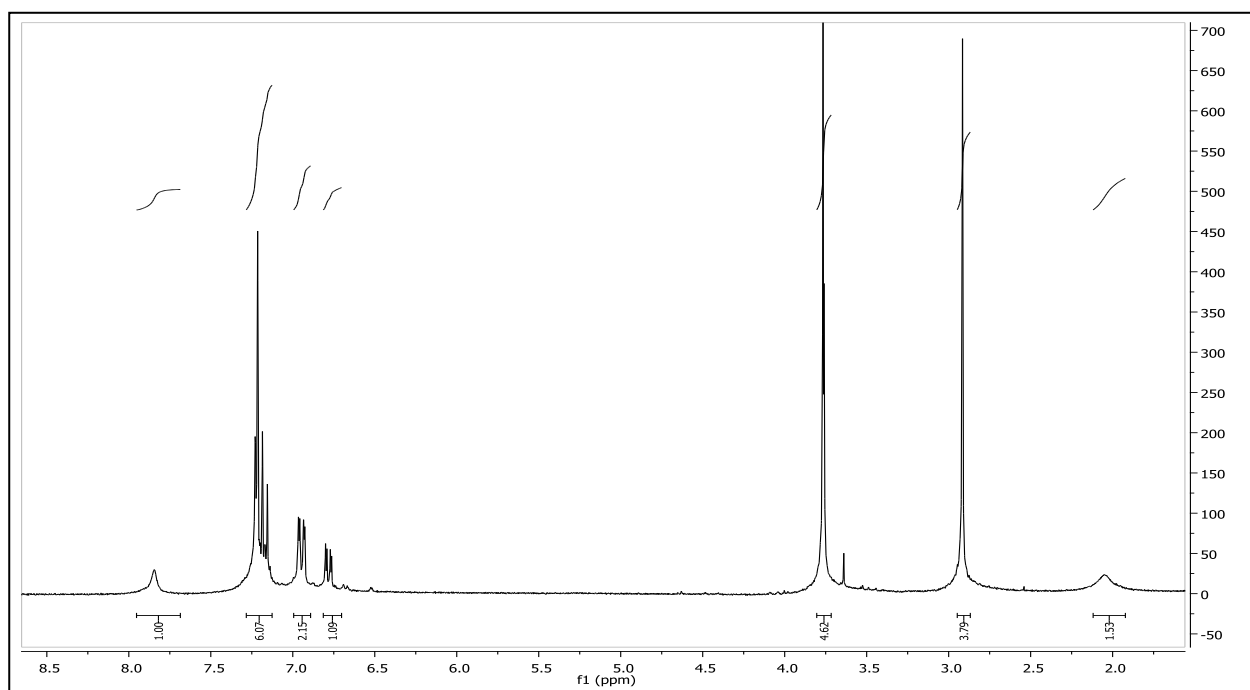

***N*-Benzyl-(6-methoxy)tryptamine (3j)**

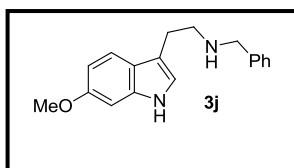

**<sup>1</sup>H NMR of *N*-benzyl-(6-methoxy)tryptamine (3j)**

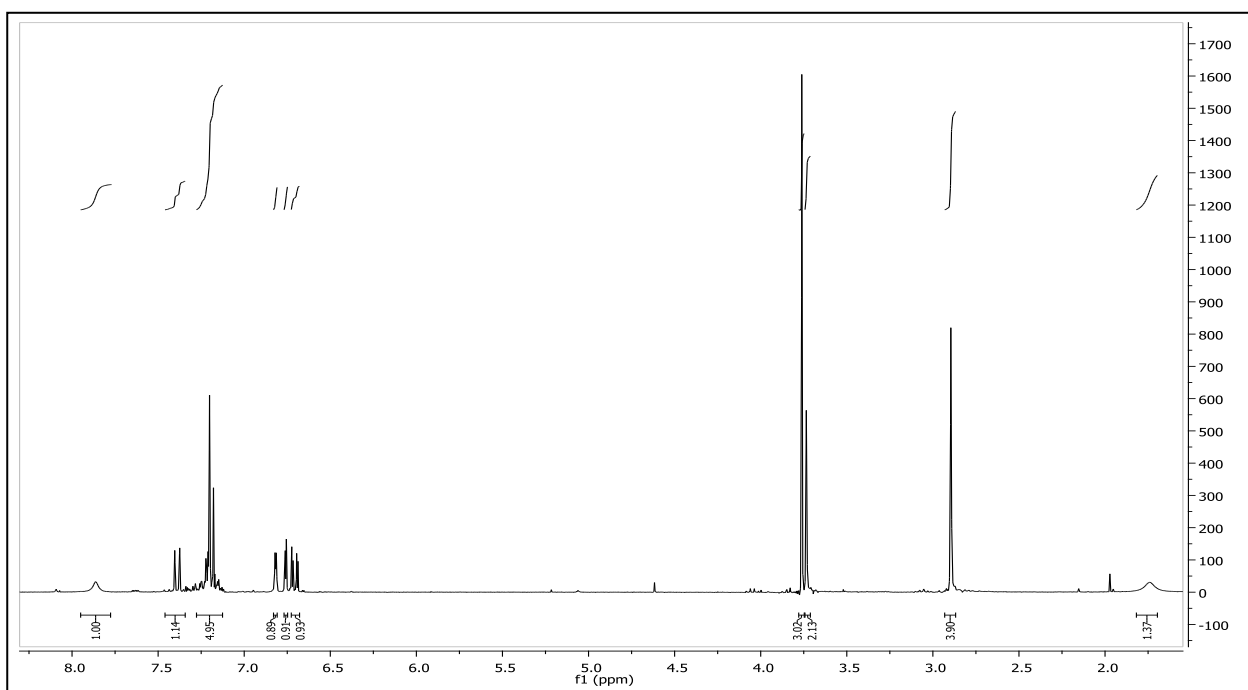

***N*-Benzyl-(7-methyl)tryptamine**

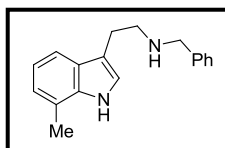

**<sup>1</sup>H NMR of *N*-benzyl-(7-methyl)tryptamine**

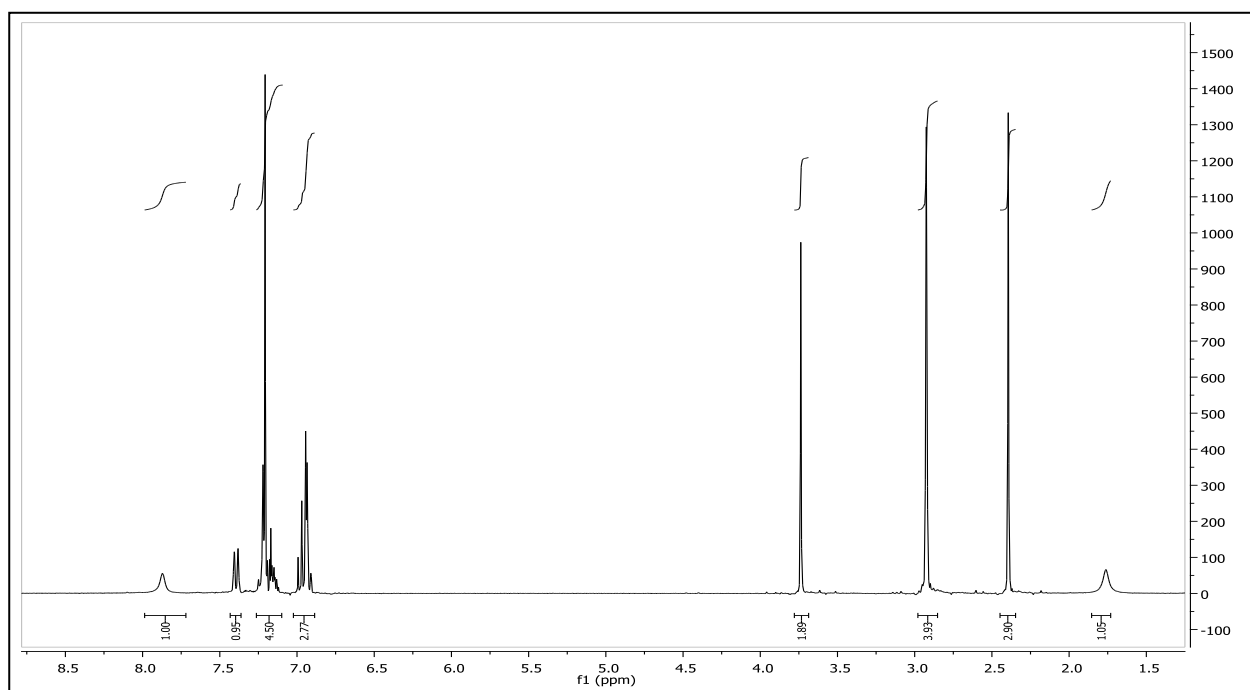



***N*-Benzyl-(5-methyl)tryptamine**

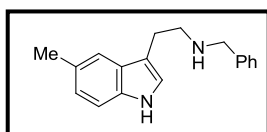

**<sup>1</sup>H NMR of *N*-benzyl-(5-methyl)tryptamine**

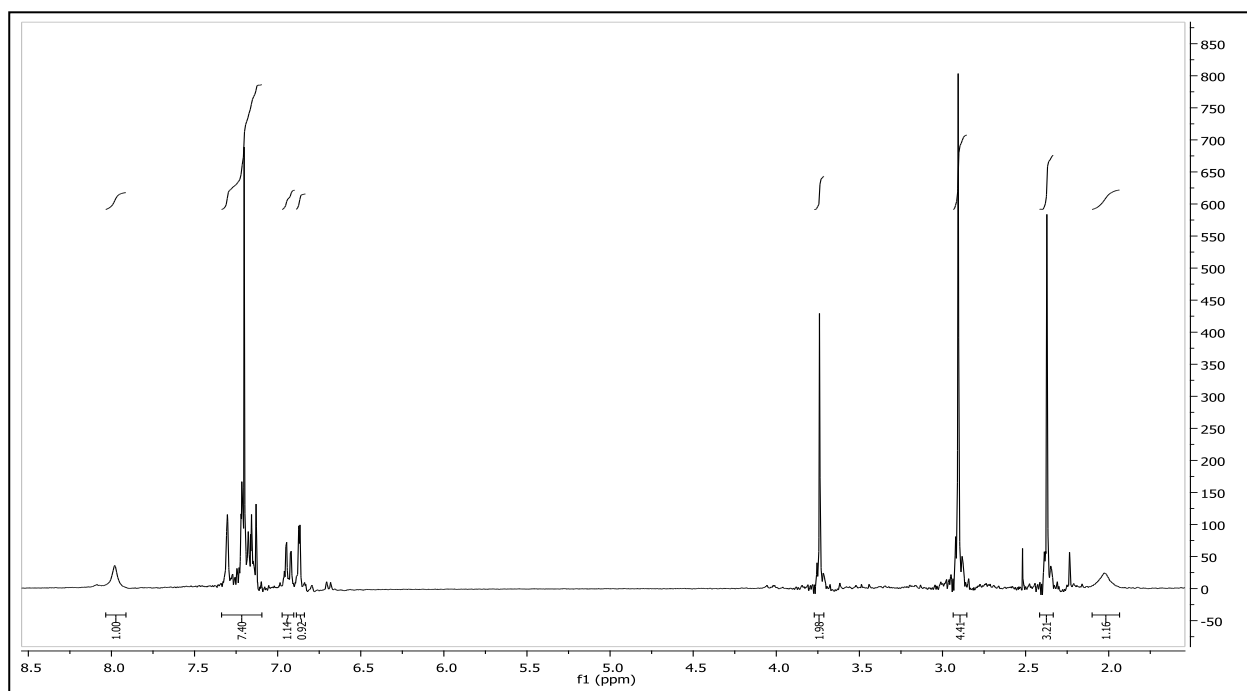

***N*-Benzyl-(5-fluoro)tryptamine**

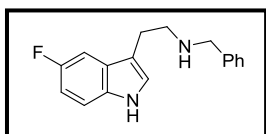

**<sup>1</sup>H NMR of *N*-benzyl-(5-fluoro)tryptamine**

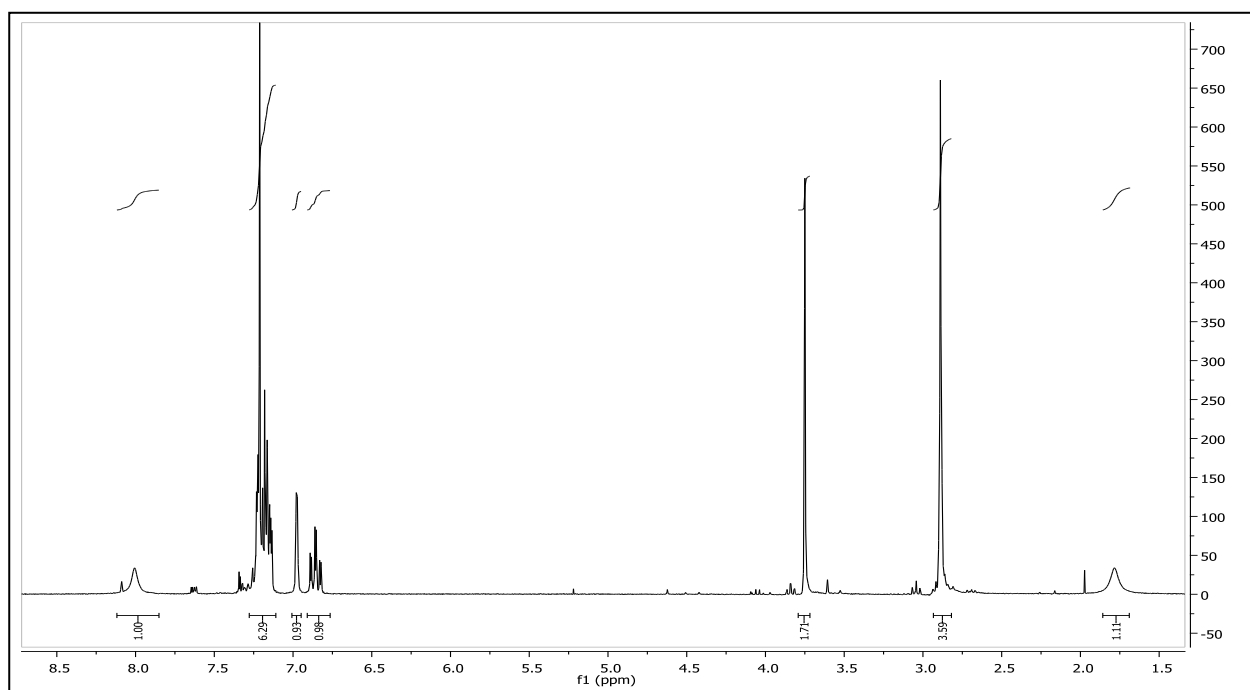

***N*-Benzyl-(5-bromo)tryptamine**

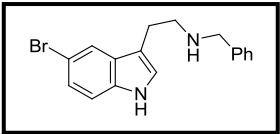

**<sup>1</sup>H NMR of *N*-benzyl-(5-bromo)tryptamine**

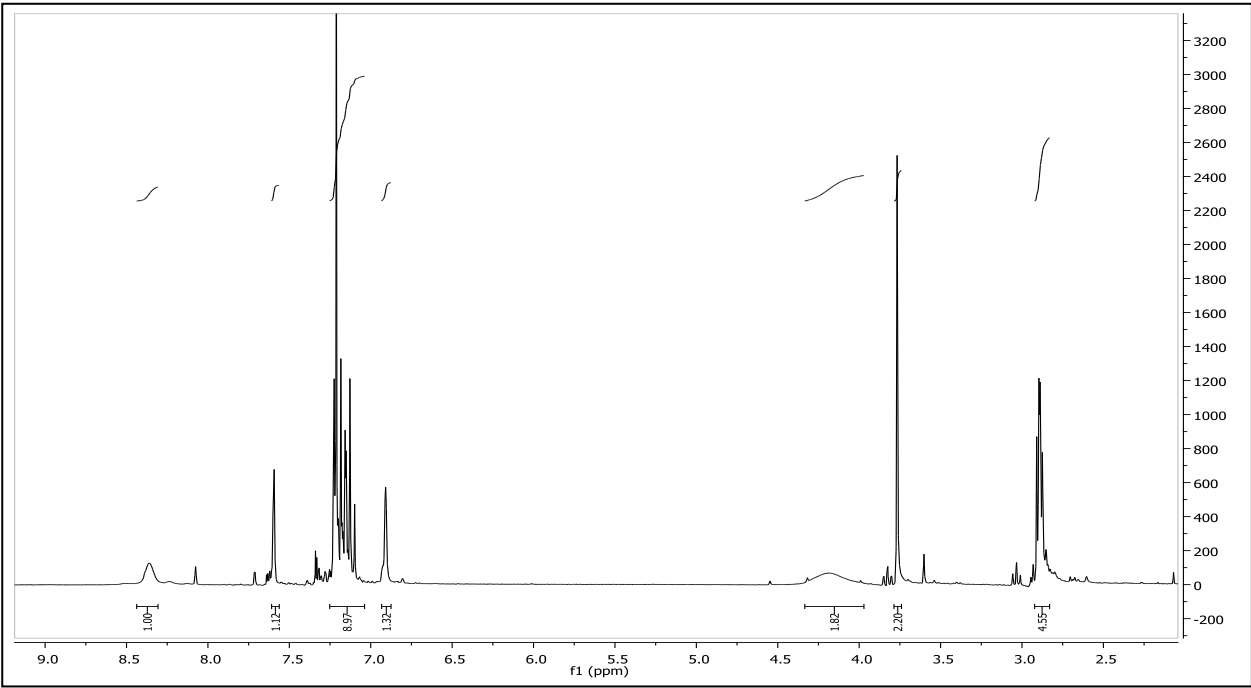

### *N*-3-Phenylprop-2-en-1-tryptamine

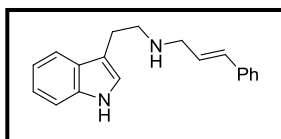

### RP-HPLC of *N*-3-phenylprop-2-en-1-tryptamine

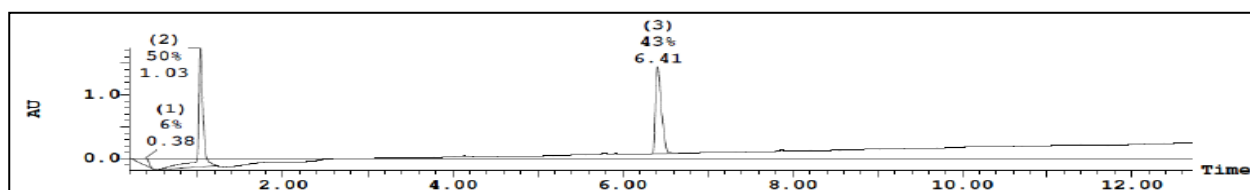

### IR of *N*-3-phenylprop-2-en-1-tryptamine

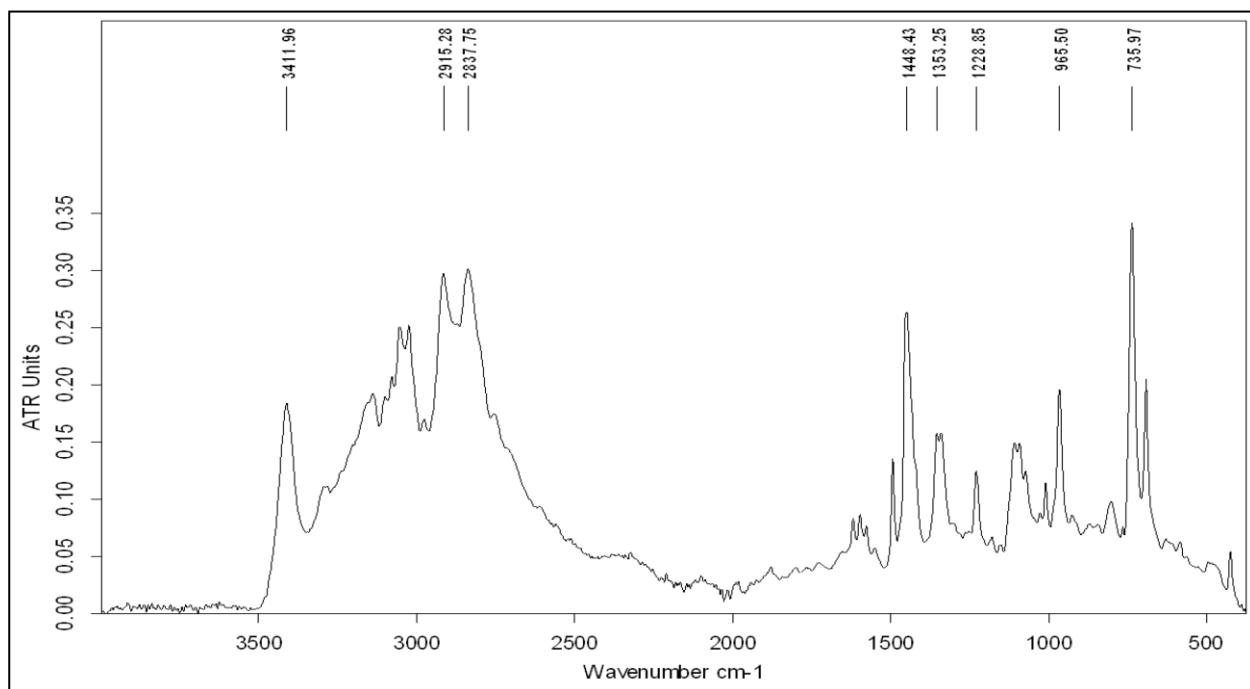

# <sup>1</sup>H NMR of *N*-3-phenylprop-2-en-1-tryptamine

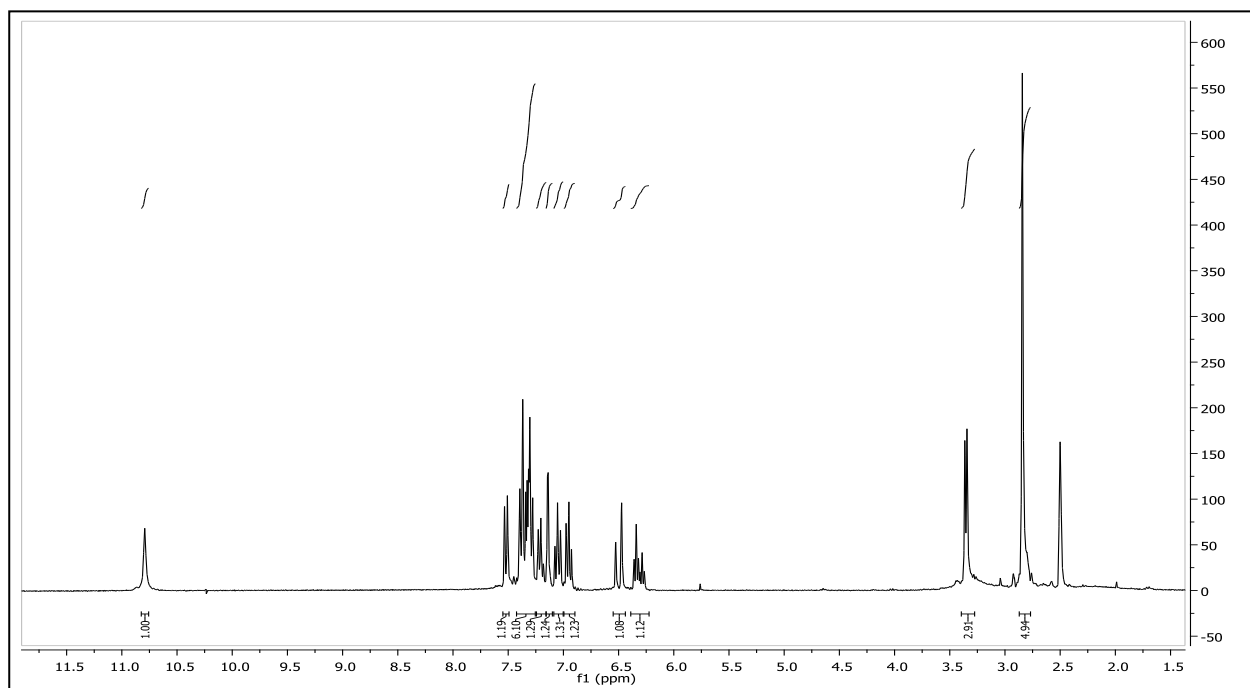

# <sup>13</sup>C NMR of *N*-3-phenylprop-2-en-1-tryptamine

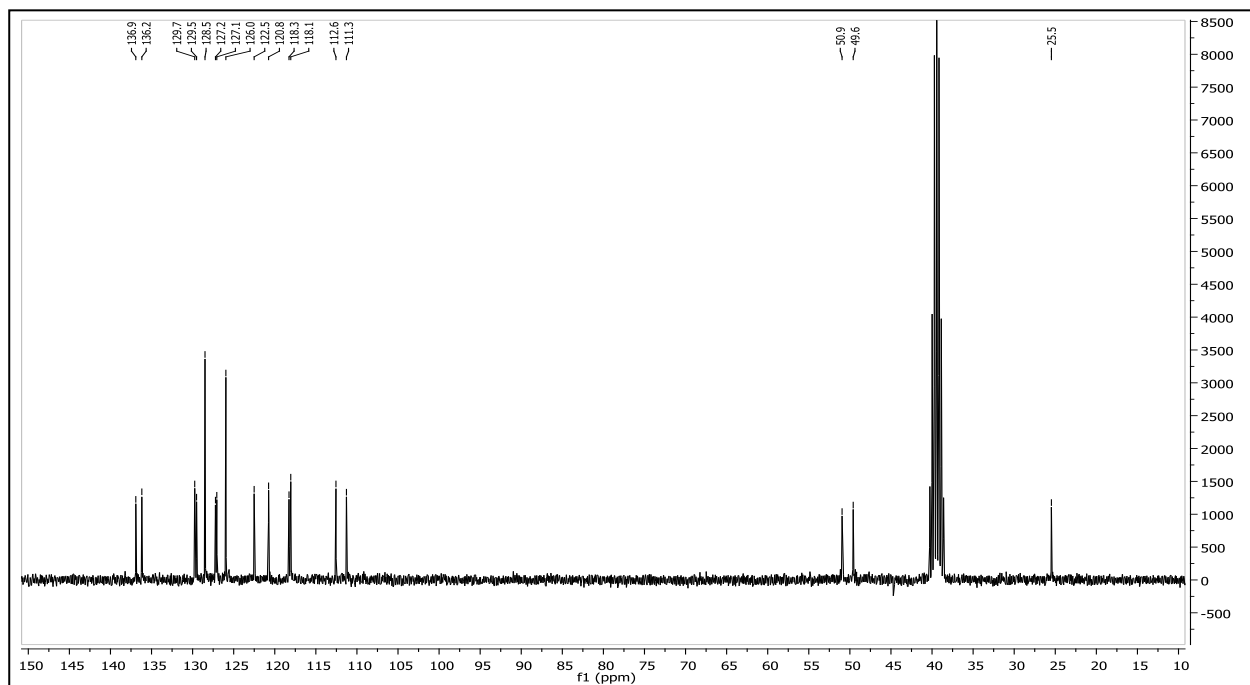

### *N*-3-(4-Nitrophenyl)prop-2-en-1-tryptamine



### RP-HPLC of *N*-3-(4-nitrophenyl)prop-2-en-1-tryptamine

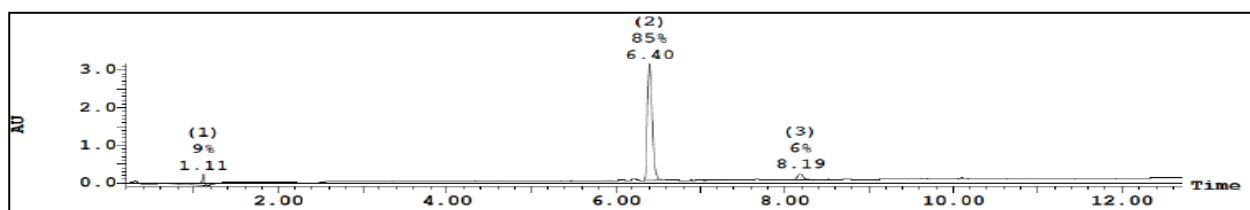

### IR of *N*-3-(4-nitrophenyl)prop-2-en-1-tryptamine

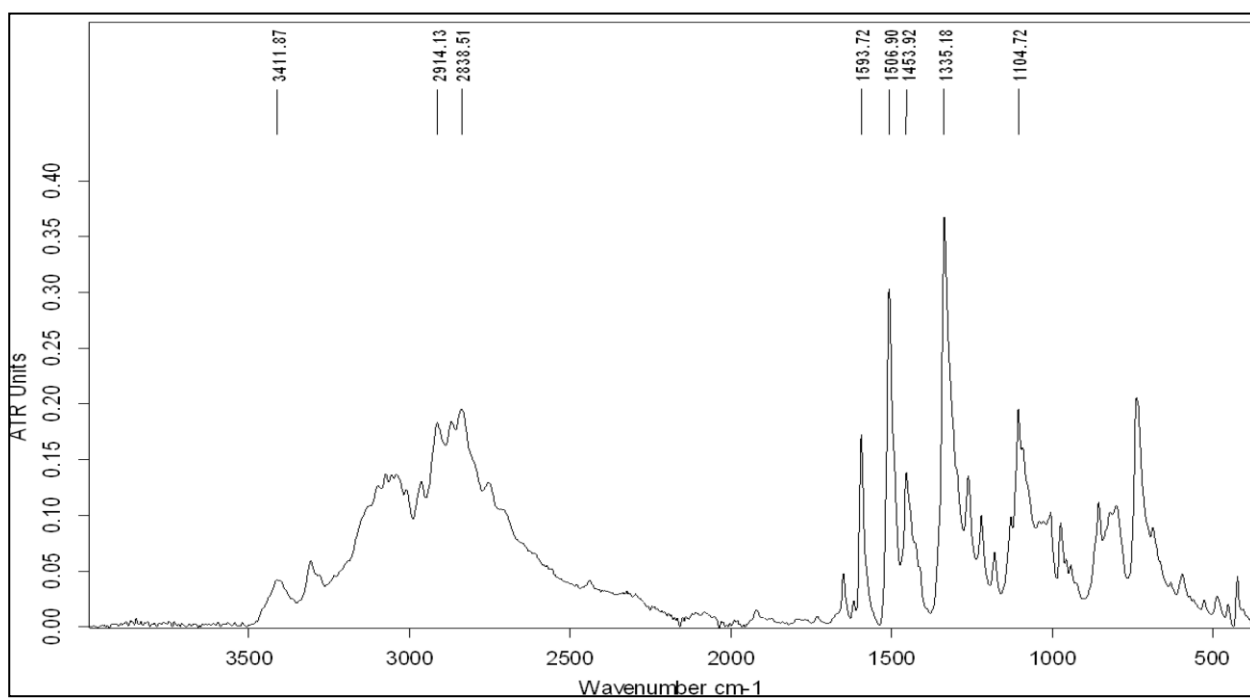

**<sup>1</sup>H NMR of *N*-3-(4-nitrophenyl)prop-2-en-1-tryptamine**

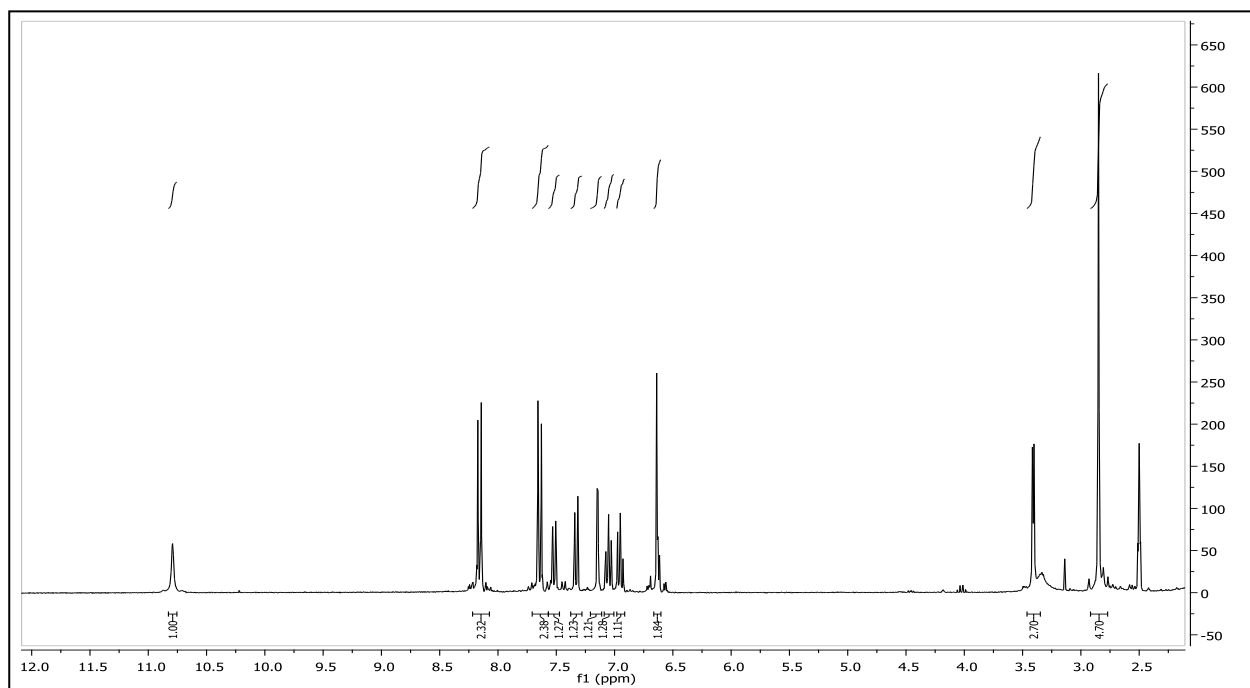

**<sup>13</sup>C NMR of *N*-3-(4-nitrophenyl)prop-2-en-1-tryptamine**

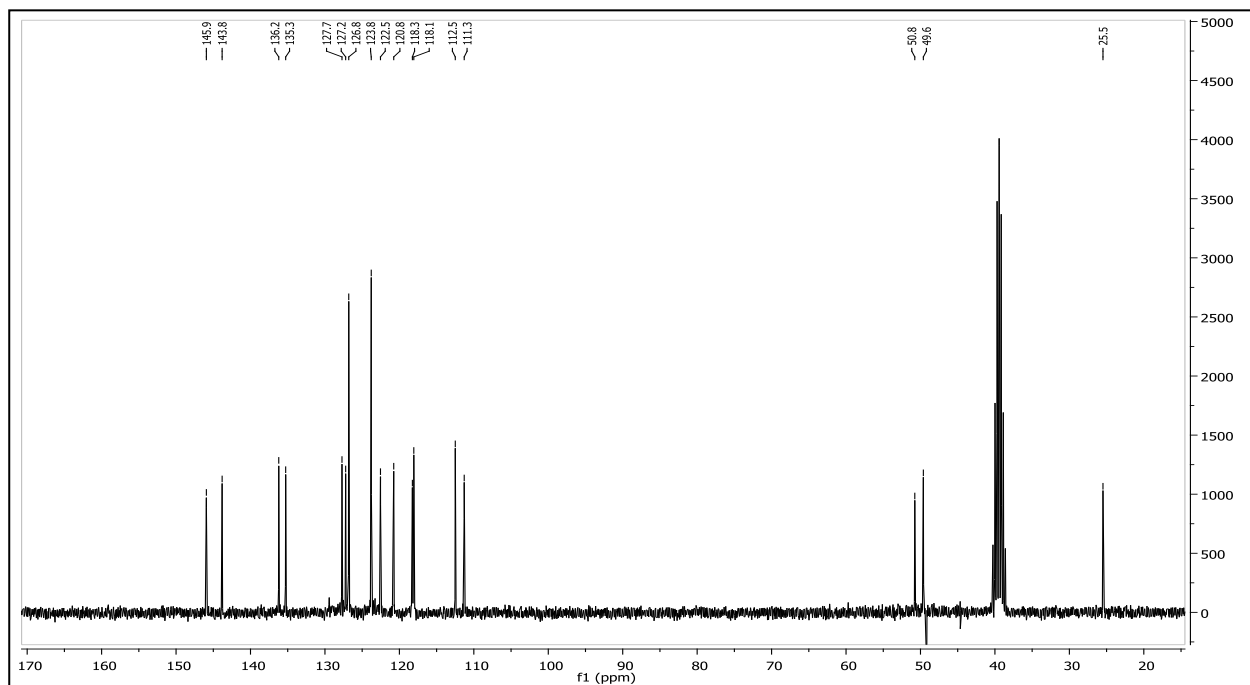

### *N*-3-(4-Methoxyphenyl)prop-2-en-1-tryptamine

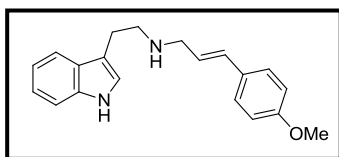

### RP-HPLC of *N*-3-(4-methoxyphenyl)prop-2-en-1-tryptamine

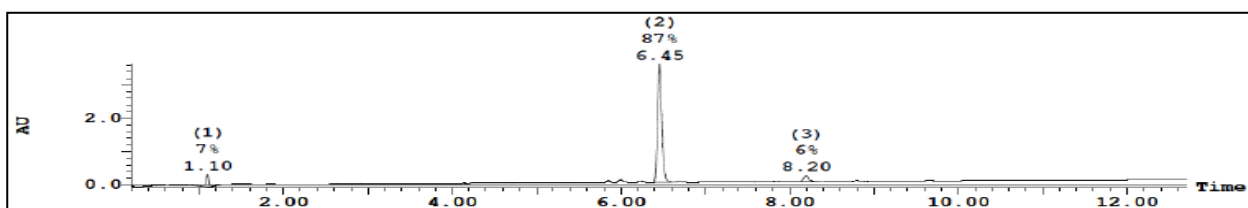

### IR of *N*-3-(4-methoxyphenyl)prop-2-en-1-tryptamine

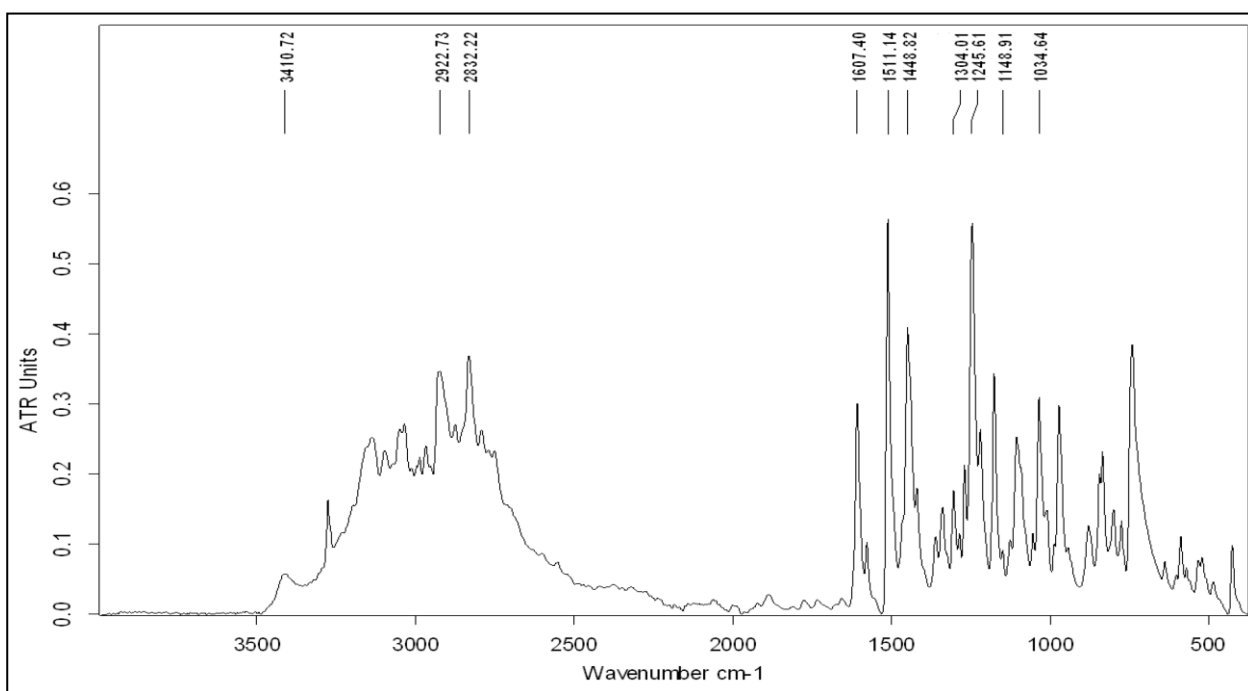



**<sup>1</sup>H NMR of *N*-3-(4-methoxyphenyl)prop-2-en-1-tryptamine**

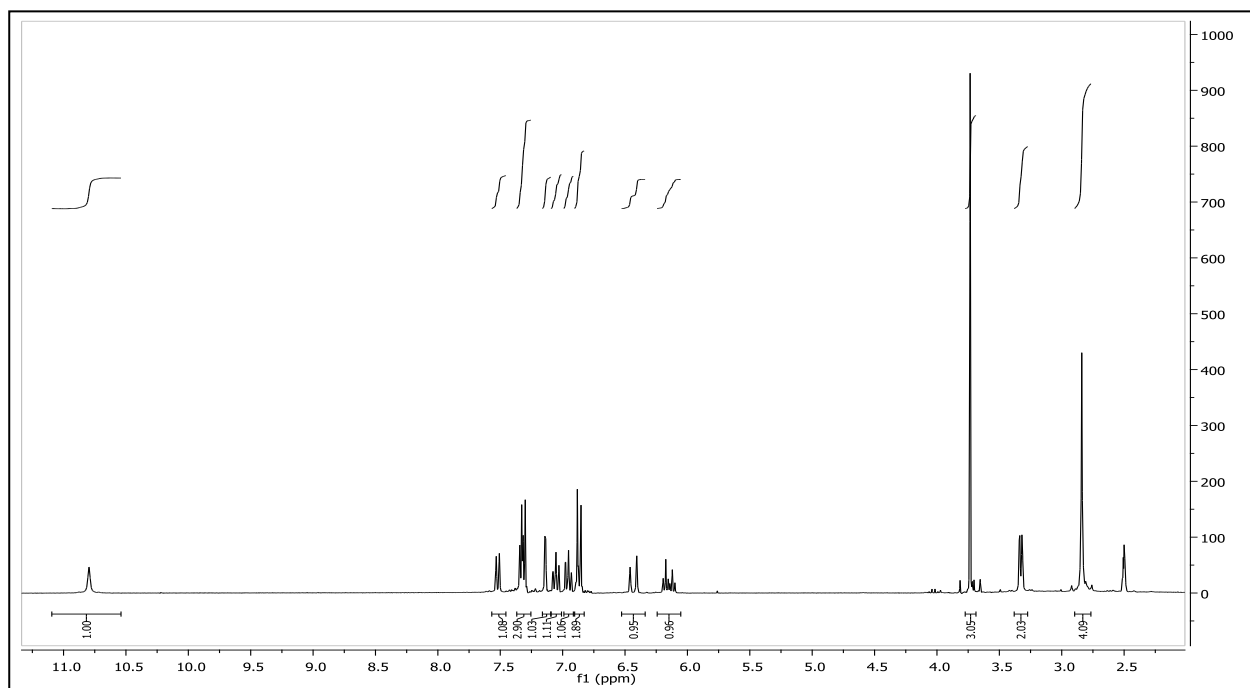

**<sup>13</sup>C NMR of *N*-3-(4-methoxyphenyl)prop-2-en-1-tryptamine**

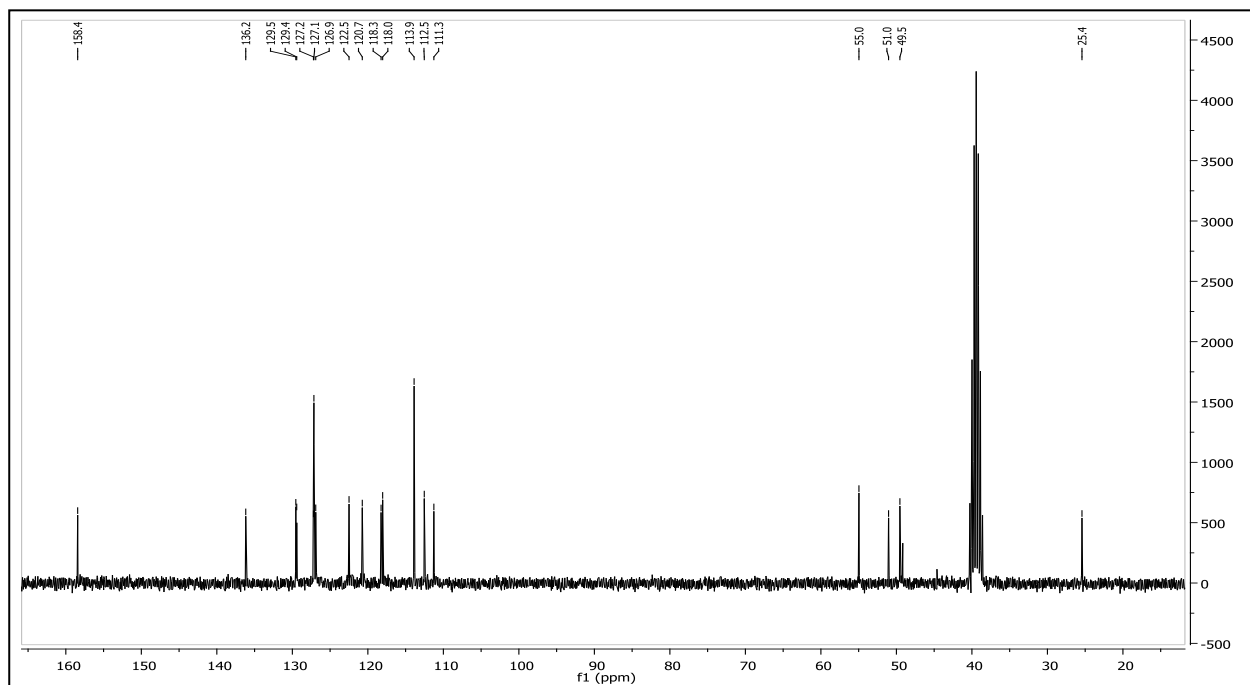

### *N*-Allyl-*N*-benzyltryptamine (1a)

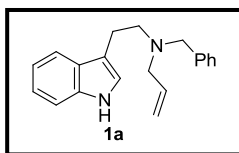

### RP-HPLC of *N*-allyl-*N*-benzyltryptamine (1a)

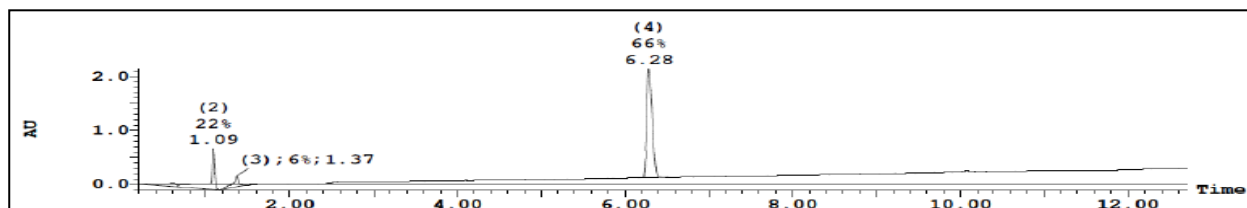

### IR of *N*-allyl-*N*-benzyltryptamine (1a)

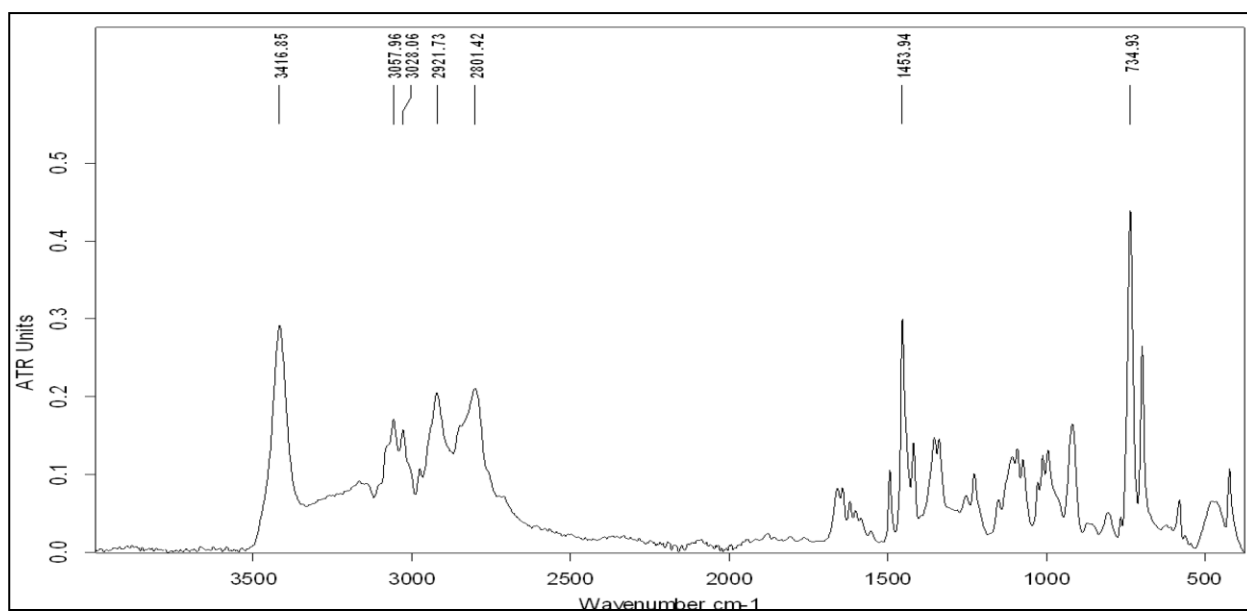

**<sup>1</sup>H NMR of *N*-allyl-*N*-benzyltryptamine (1a)**

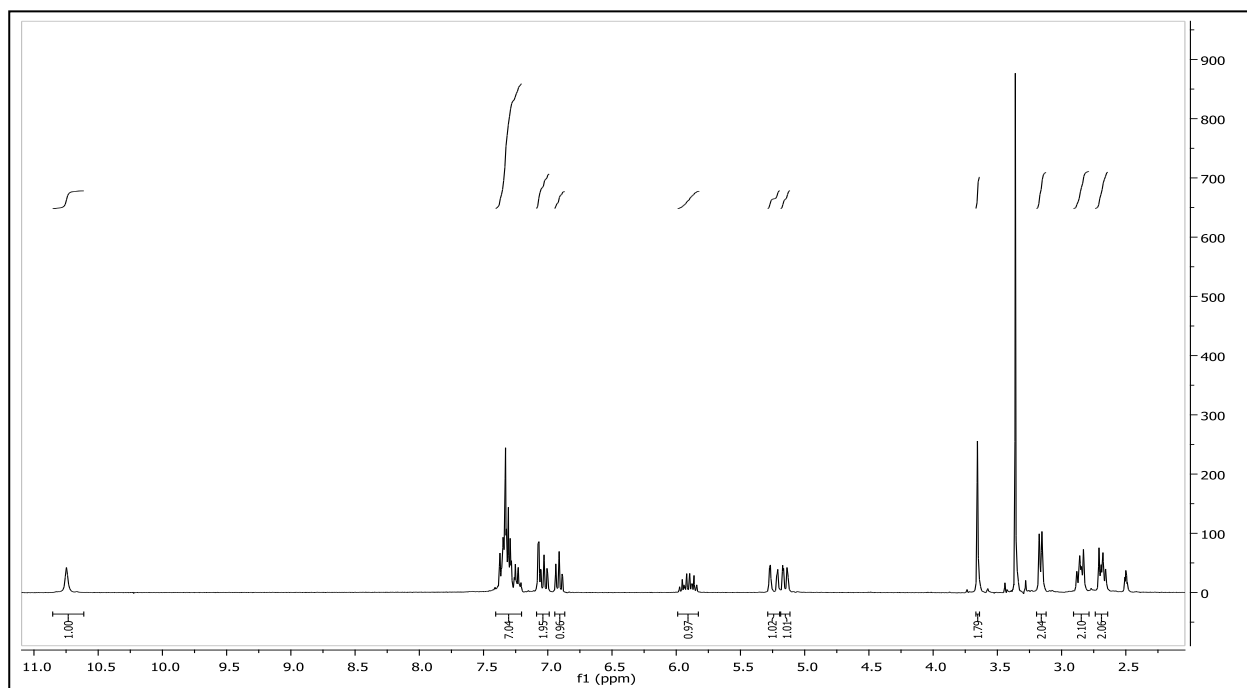

**<sup>13</sup>C NMR of *N*-allyl-*N*-benzyltryptamine (1a)**

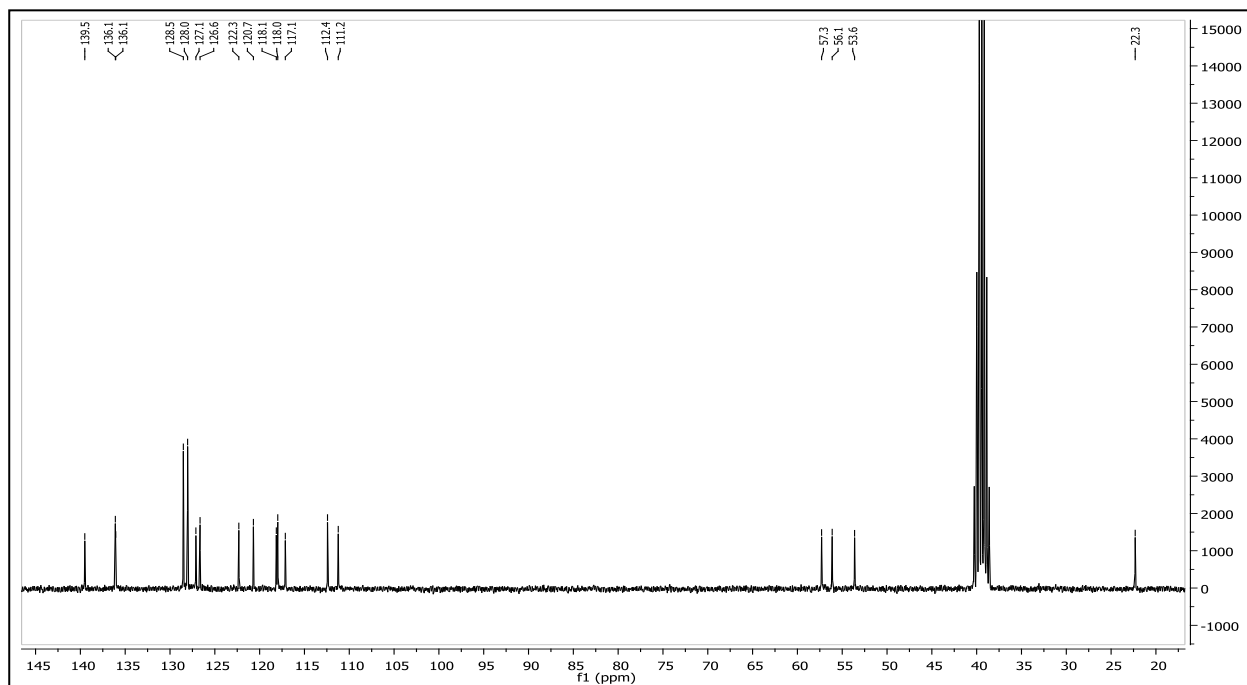

***N*-Allyl-*N*-(4-nitro)benzyltryptamine (1b)**

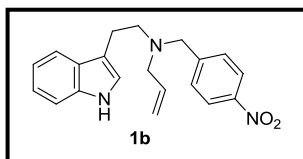

**RP-HPLC of *N*-allyl-*N*-(4-nitro)benzyltryptamine (1b)**

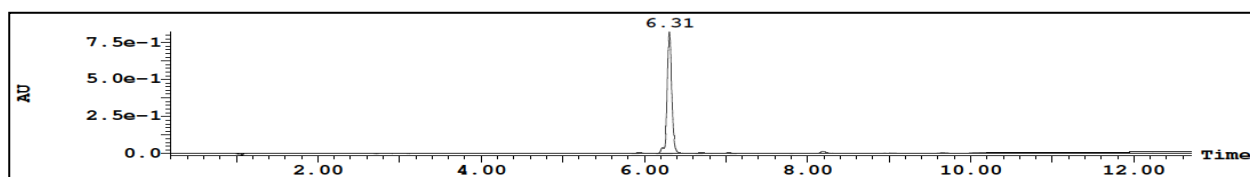

**IR of *N*-allyl-*N*-(4-nitro)benzyltryptamine (1b)**

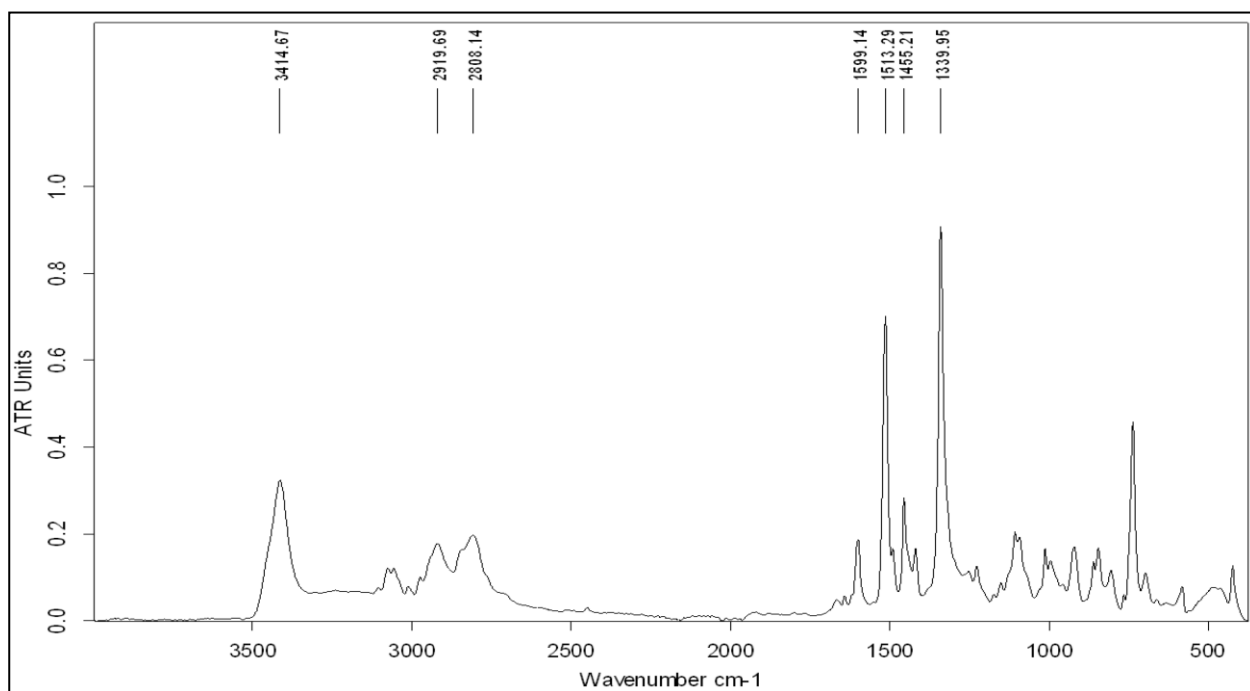

**<sup>1</sup>H NMR of *N*-allyl-*N*-(4-nitro)benzyltryptamine (1b)**

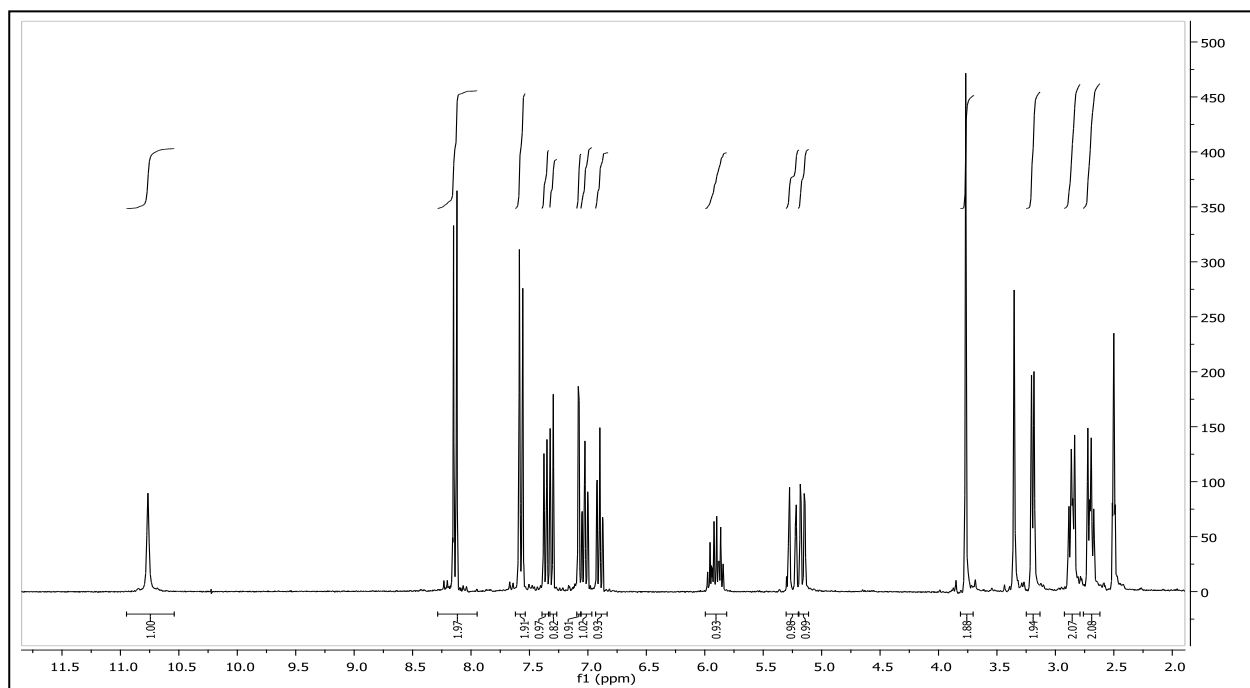

**<sup>13</sup>C NMR of *N*-allyl-*N*-(4-nitro)benzyltryptamine (1b)**

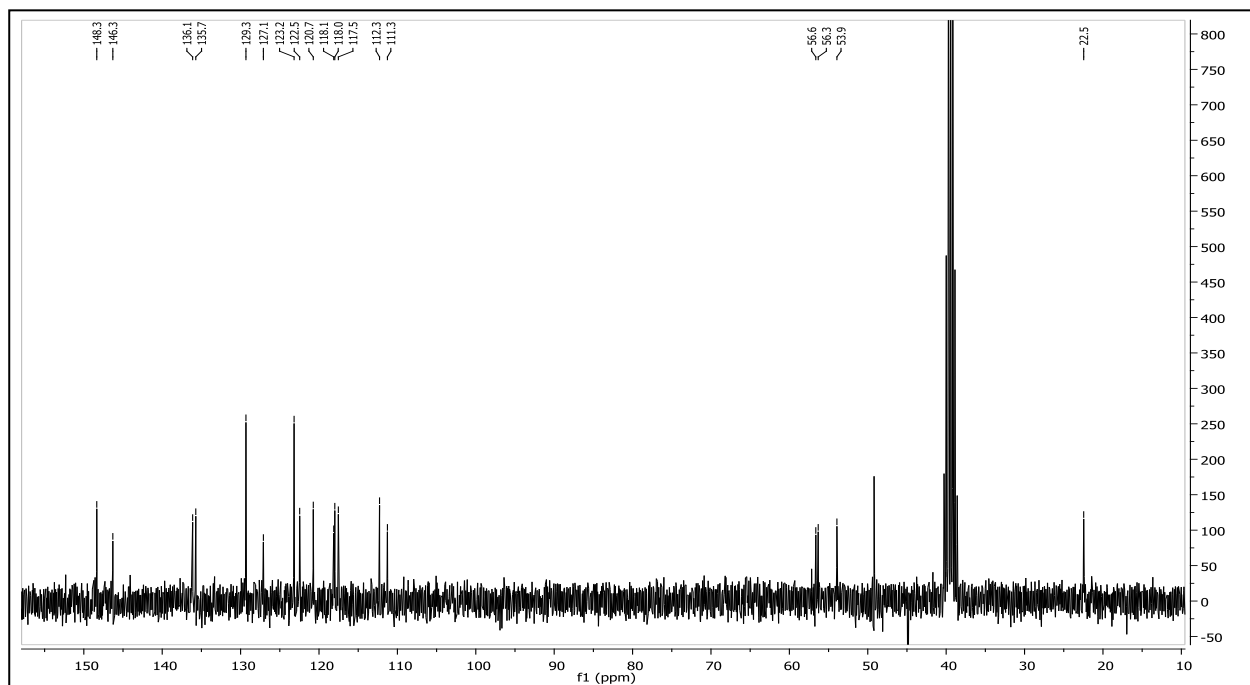

***N*-Allyl-*N*-(3,4-dimethoxy)benzyltryptamine (1c)**

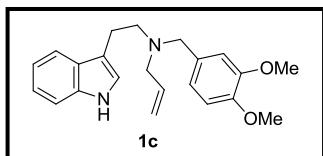

**RP-HPLC of *N*-allyl-*N*-(3,4-dimethoxy)benzyltryptamine (1c)**

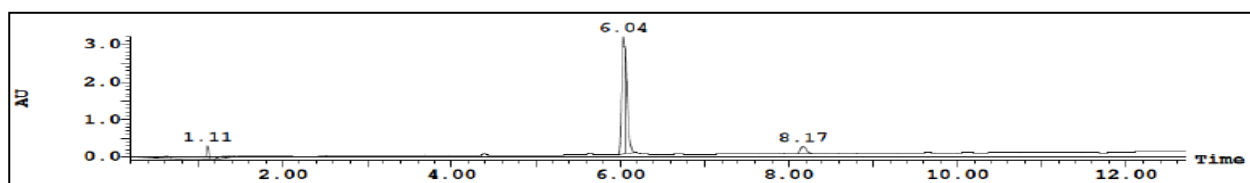

**IR of *N*-allyl-*N*-(3,4-dimethoxy)benzyltryptamine (1c)**

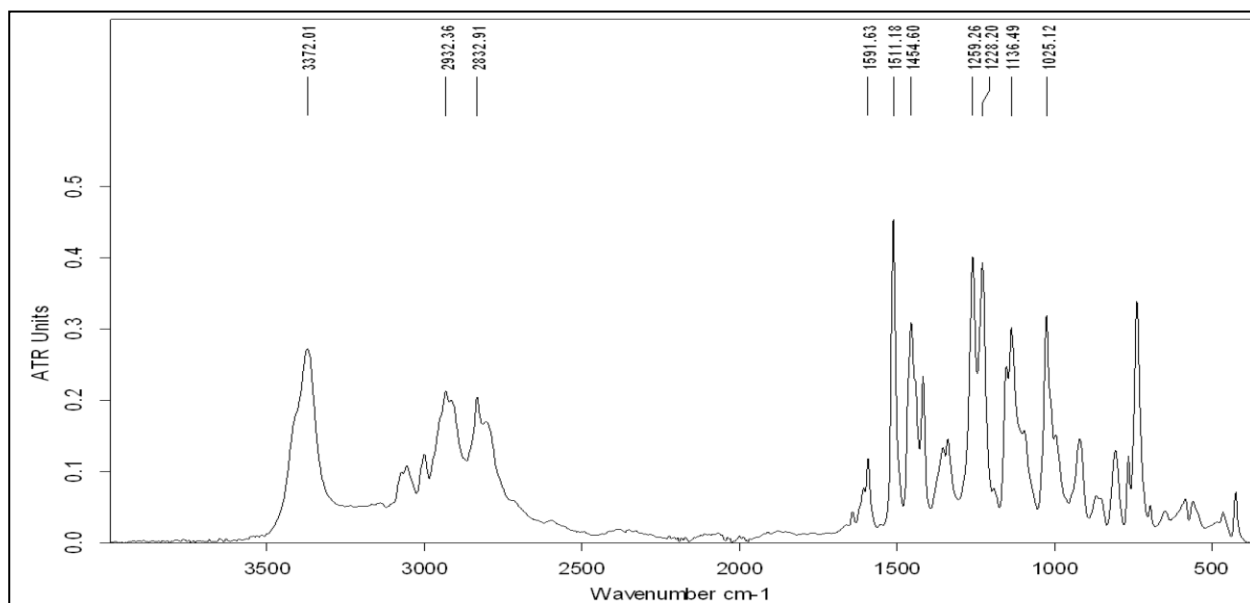

**<sup>1</sup>H NMR of *N*-allyl-*N*-(3,4-dimethoxy)benzyltryptamine (1c)**

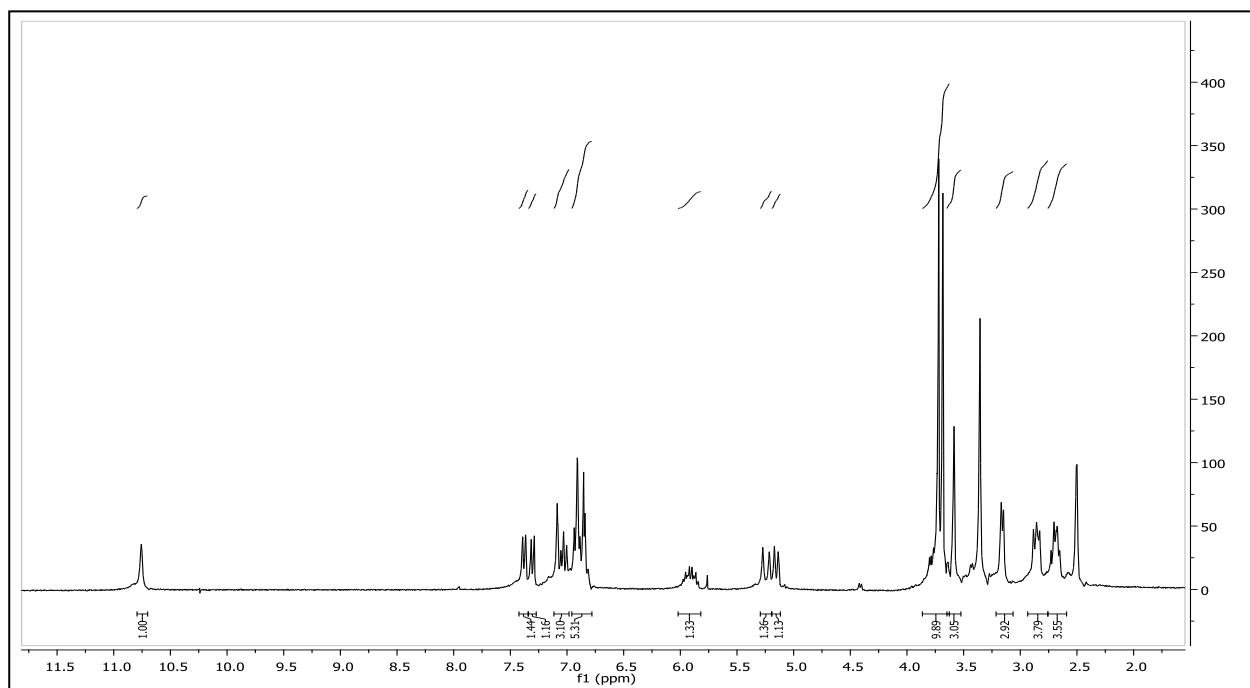

**<sup>13</sup>C NMR of *N*-allyl-*N*-(3,4-dimethoxy)benzyltryptamine (1c)**

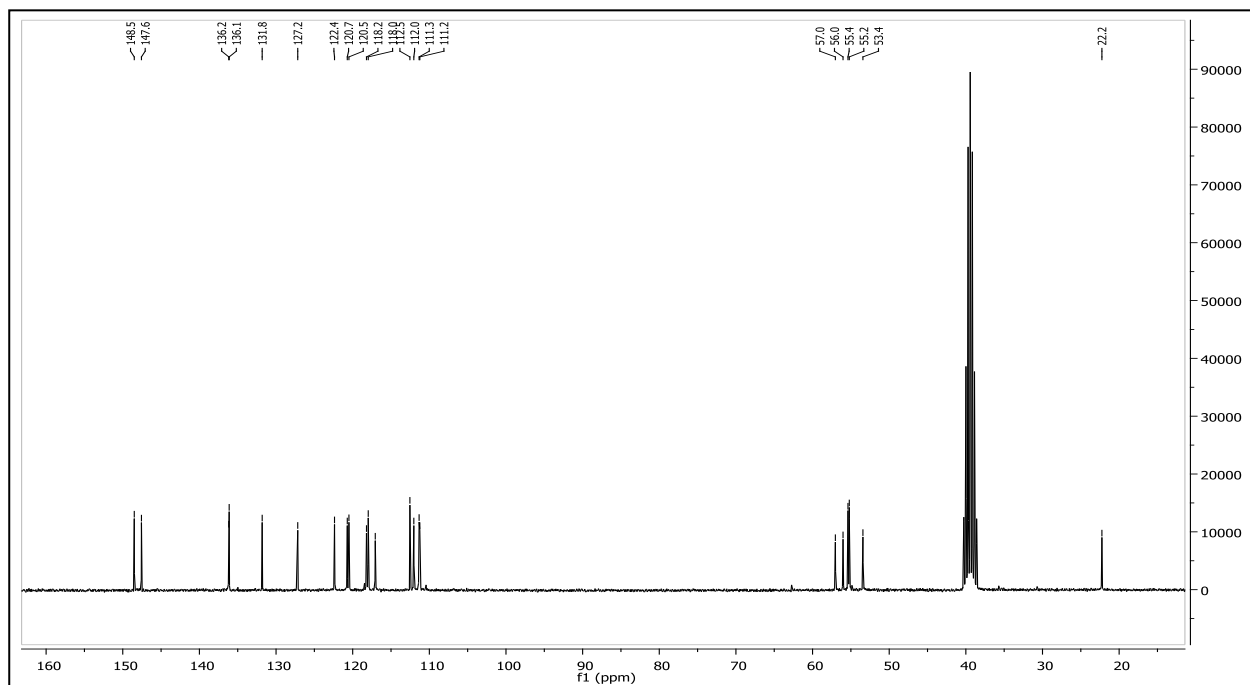

***N*-Allyl-*N*-cyclohexylmethyltryptamine (1d)**

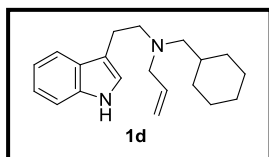

**RP-HPLC of *N*-allyl-*N*-cyclohexylmethyltryptamine (1d)**

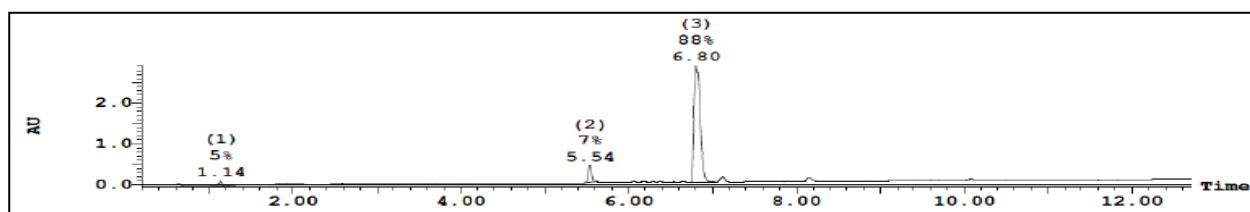

**IR of *N*-allyl-*N*-cyclohexylmethyltryptamine (1d)**

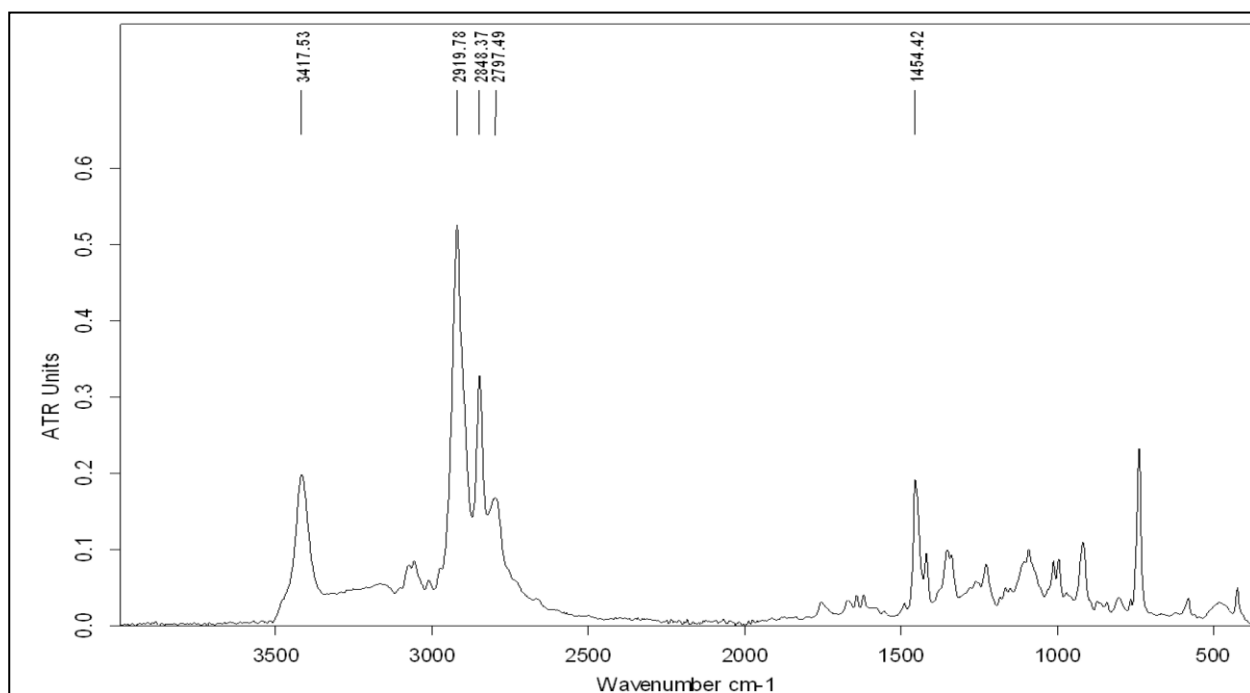



**<sup>1</sup>H NMR of *N*-allyl-*N*-cyclohexylmethyltryptamine (1d)**

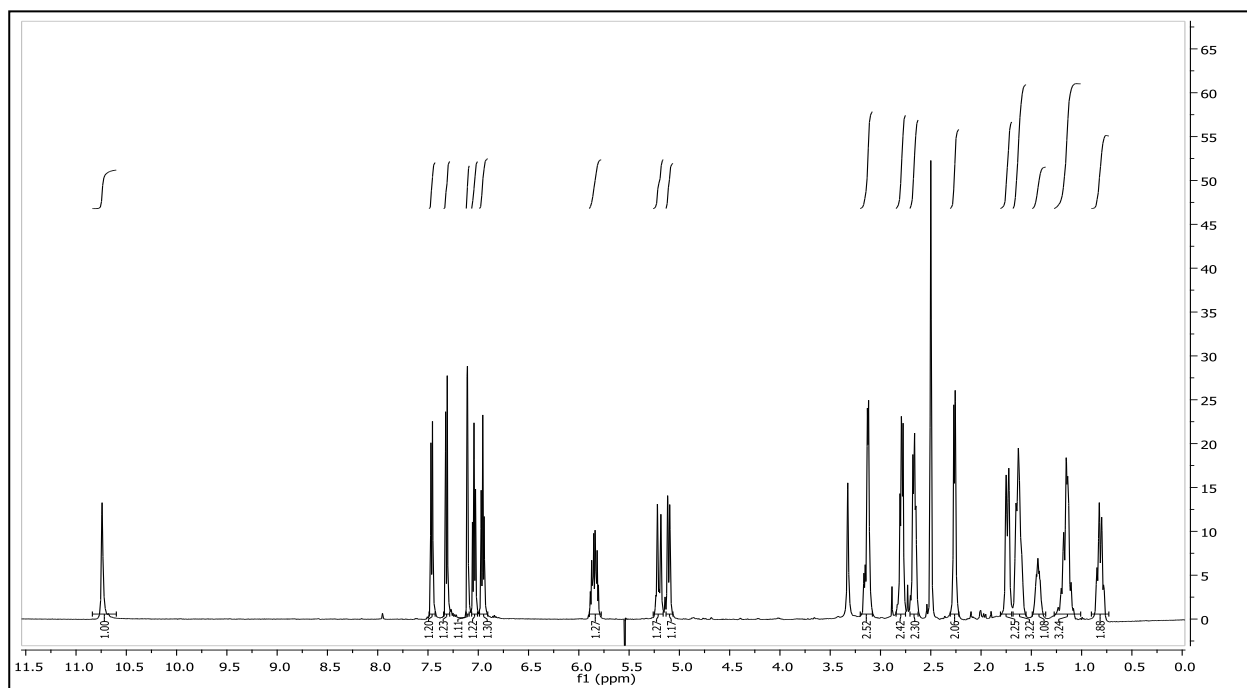

**<sup>13</sup>C NMR of *N*-allyl-*N*-cyclohexylmethyltryptamine (1d)**

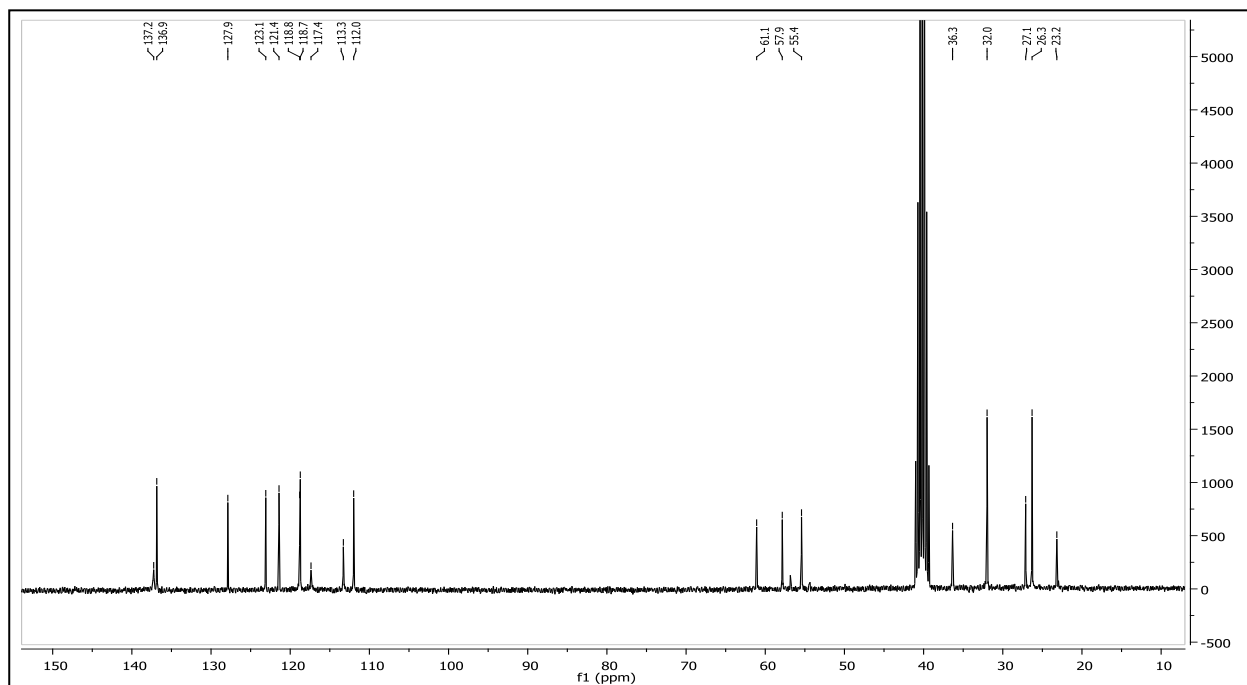

***N*-Allyl-*N*-heptyltryptamine (1e)**

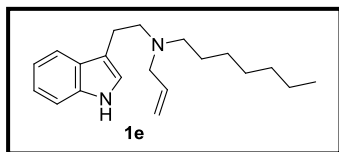

**RP-HPLC of *N*-allyl-*N*-heptyltryptamine (1e)**

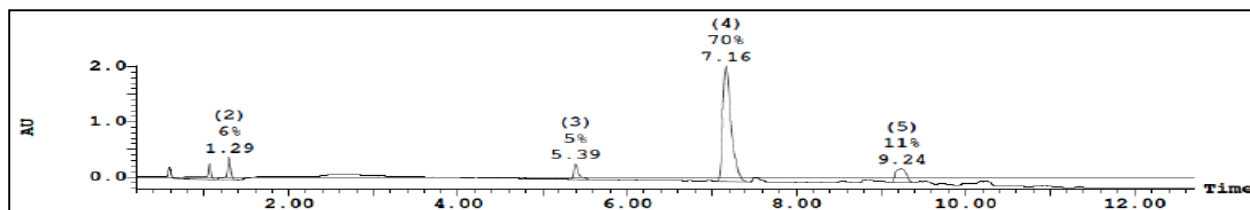

**IR of *N*-allyl-*N*-heptyltryptamine (1e)**

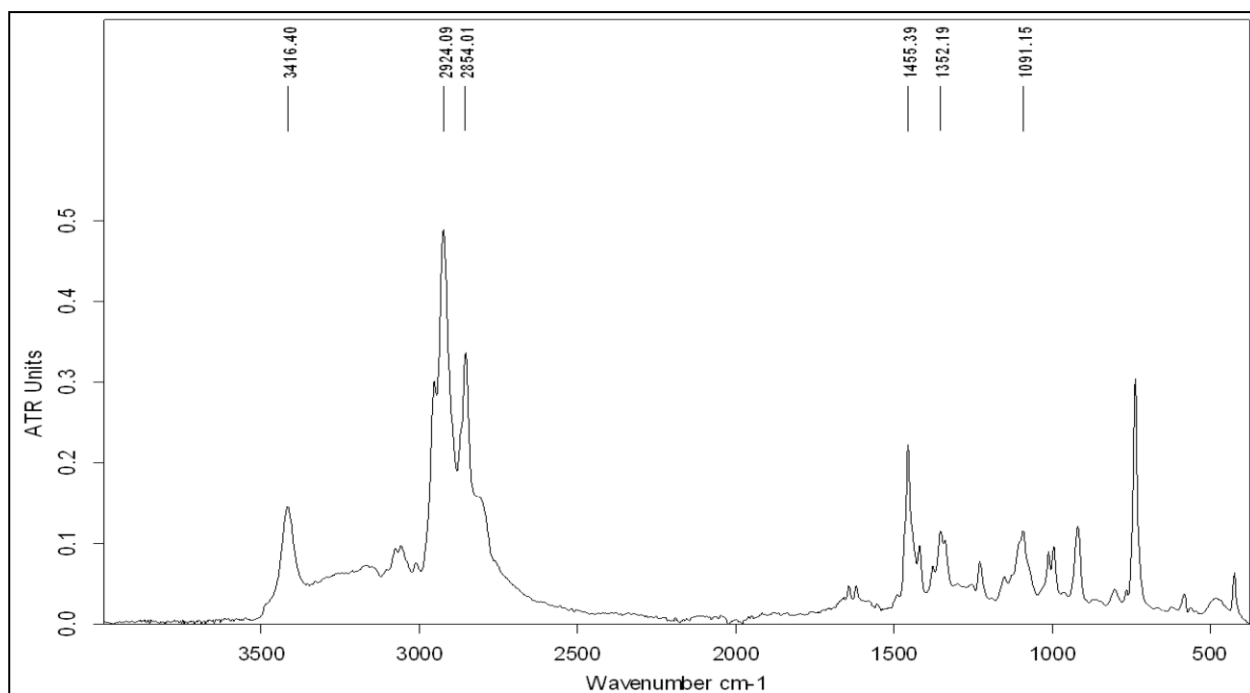

**<sup>1</sup>H NMR of *N*-allyl-*N*-heptyltryptamine (1e)**

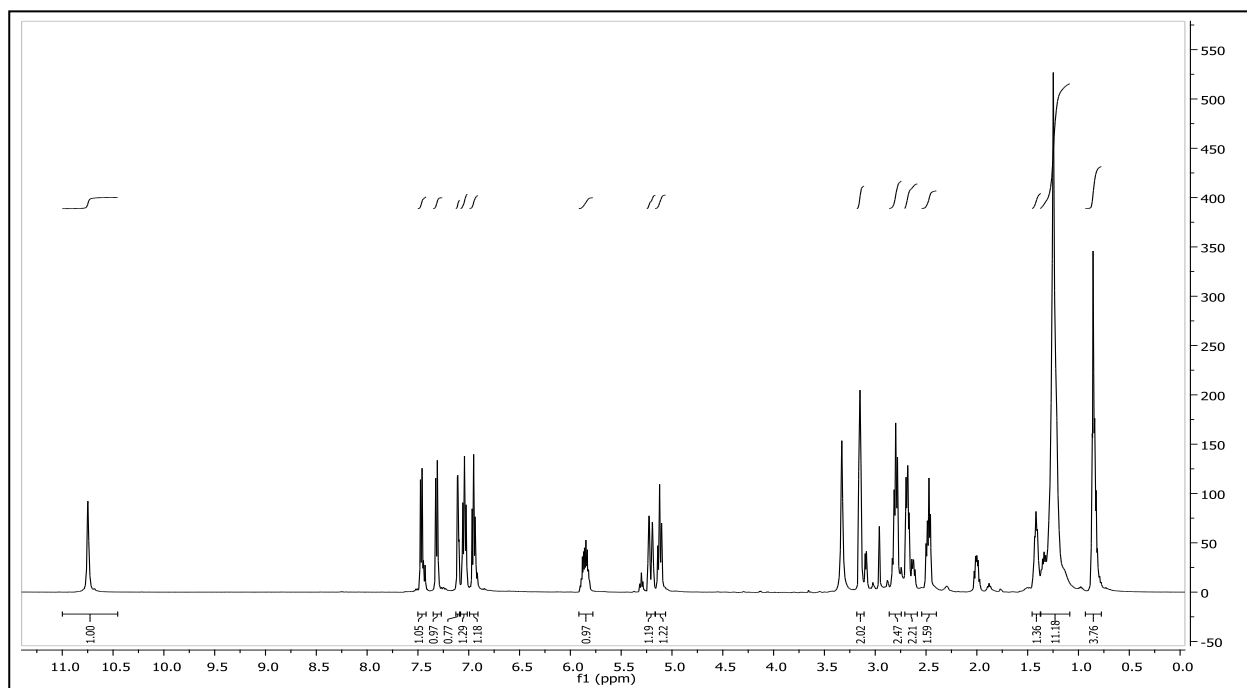

**<sup>13</sup>C NMR of *N*-allyl-*N*-heptyltryptamine (1e)**

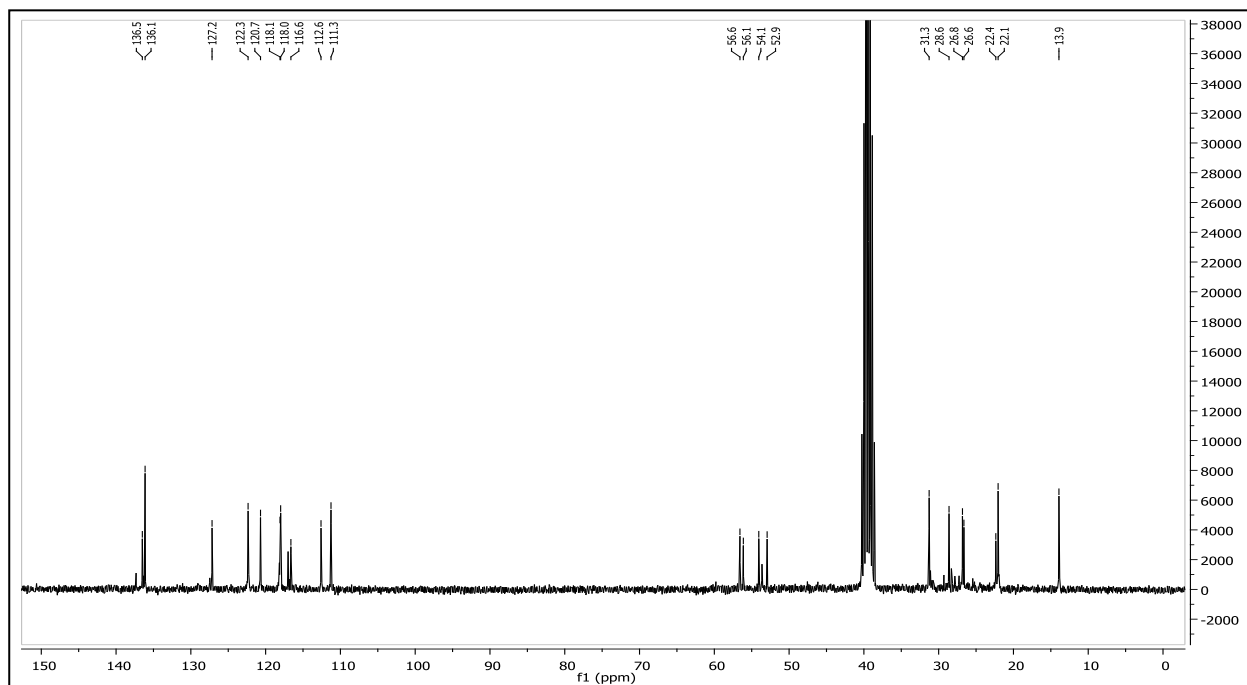

### *N,N*-Diallyltryptamine (1f)

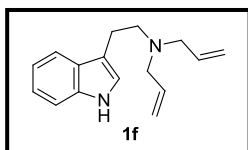

### RP-HPLC of *N,N*-diallyltryptamine (1f)

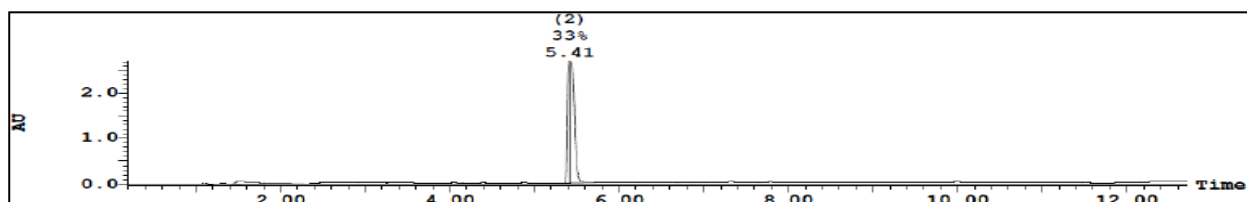

### IR of *N,N*-diallyltryptamine (1f)

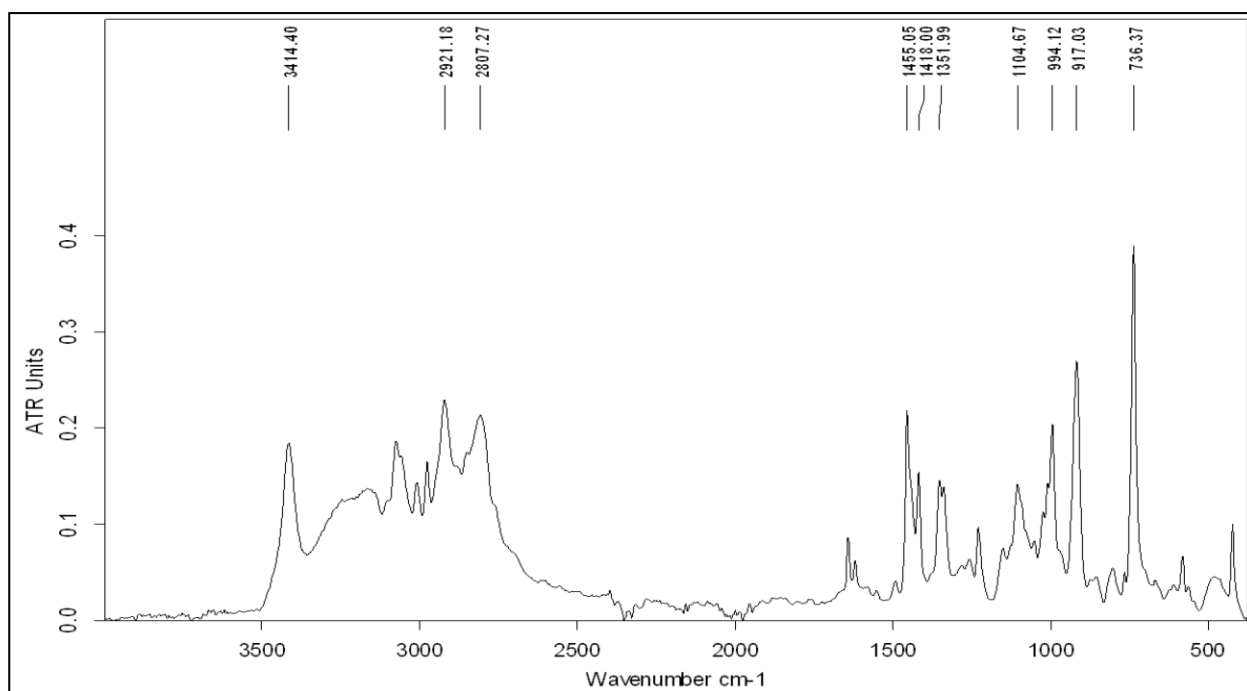

**<sup>1</sup>H NMR of *N,N*-diallyltryptamine (1f)**

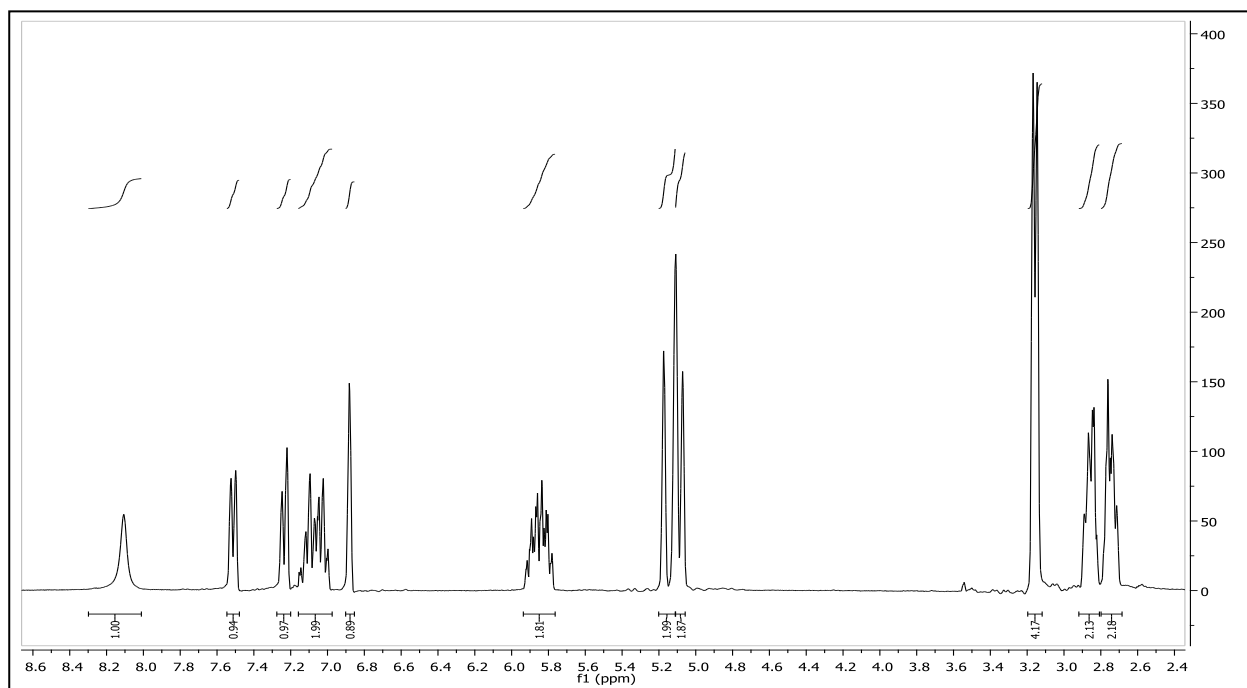

**<sup>13</sup>C NMR of *N,N*-diallyltryptamine (1f)**

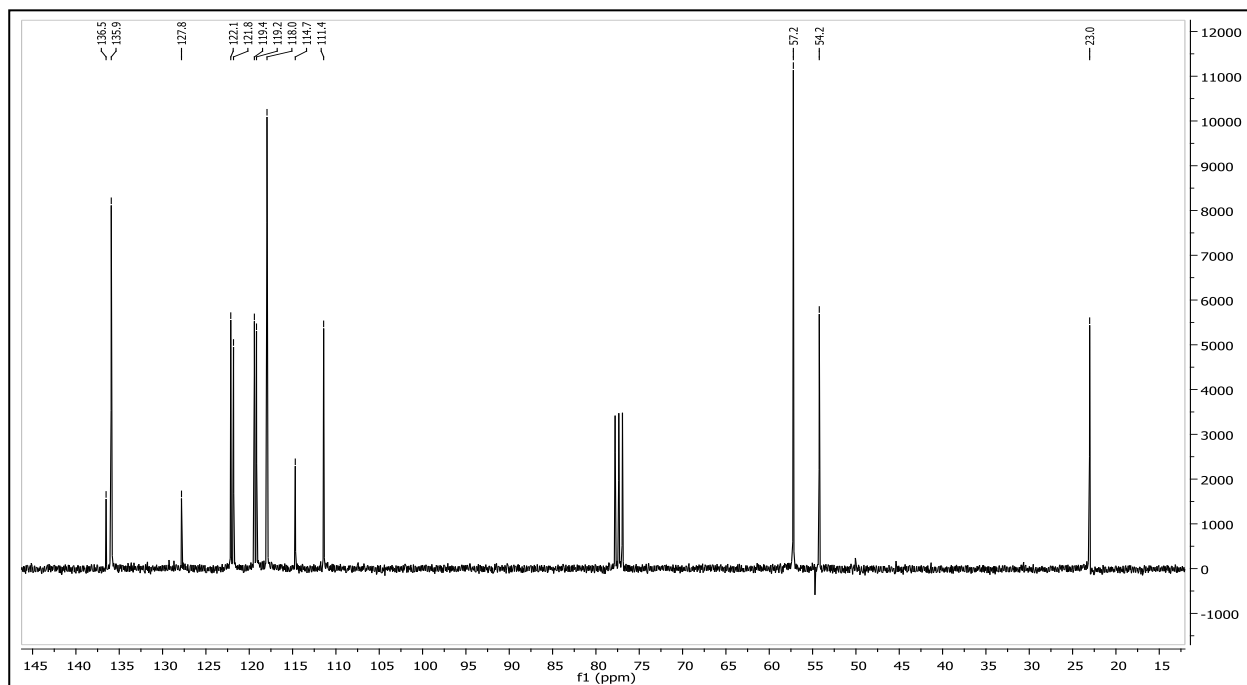

### *N*-Allyl-*N*-phenyltryptamine (1g)

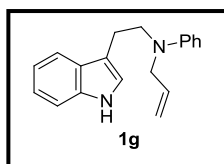

### RP-HPLC of *N*-allyl-*N*-phenyltryptamine (1g)

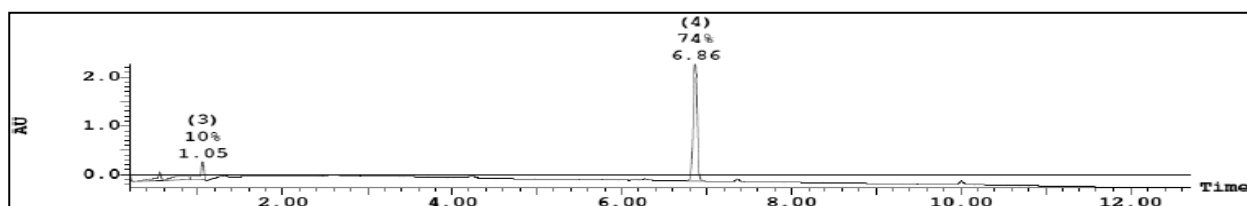

### IR of *N*-allyl-*N*-phenyltryptamine (1g)

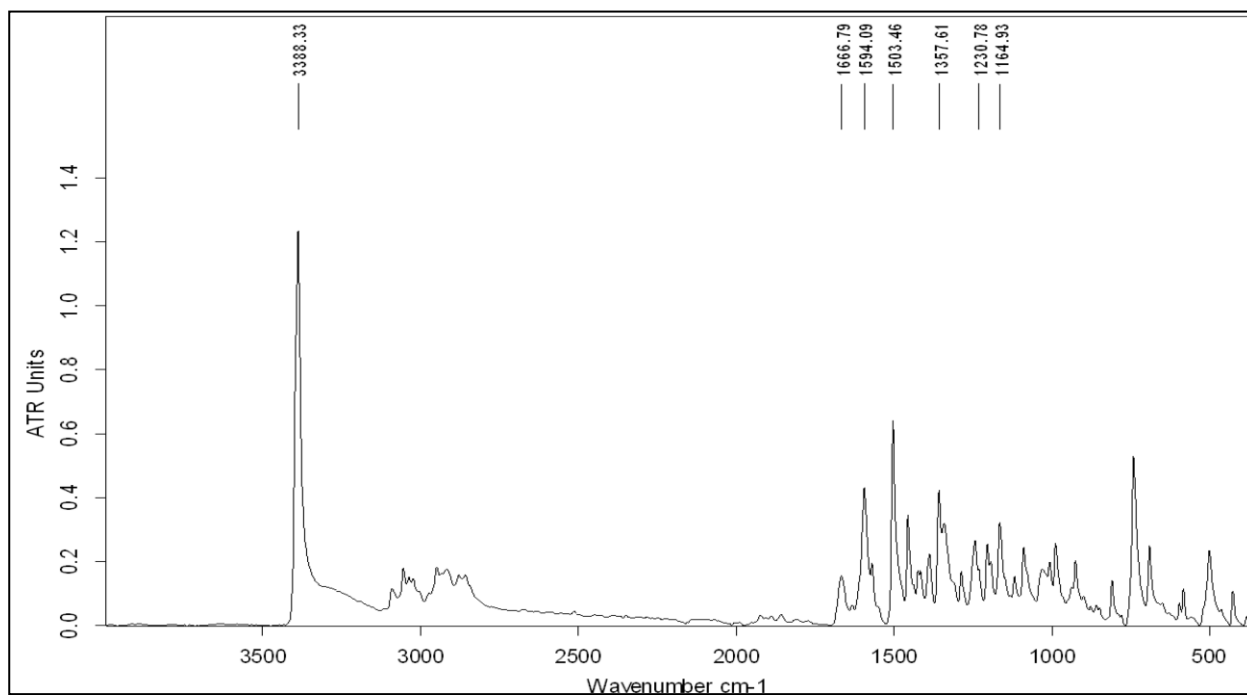

**<sup>1</sup>H NMR of *N*-allyl-*N*-phenyltryptamine (1g)**

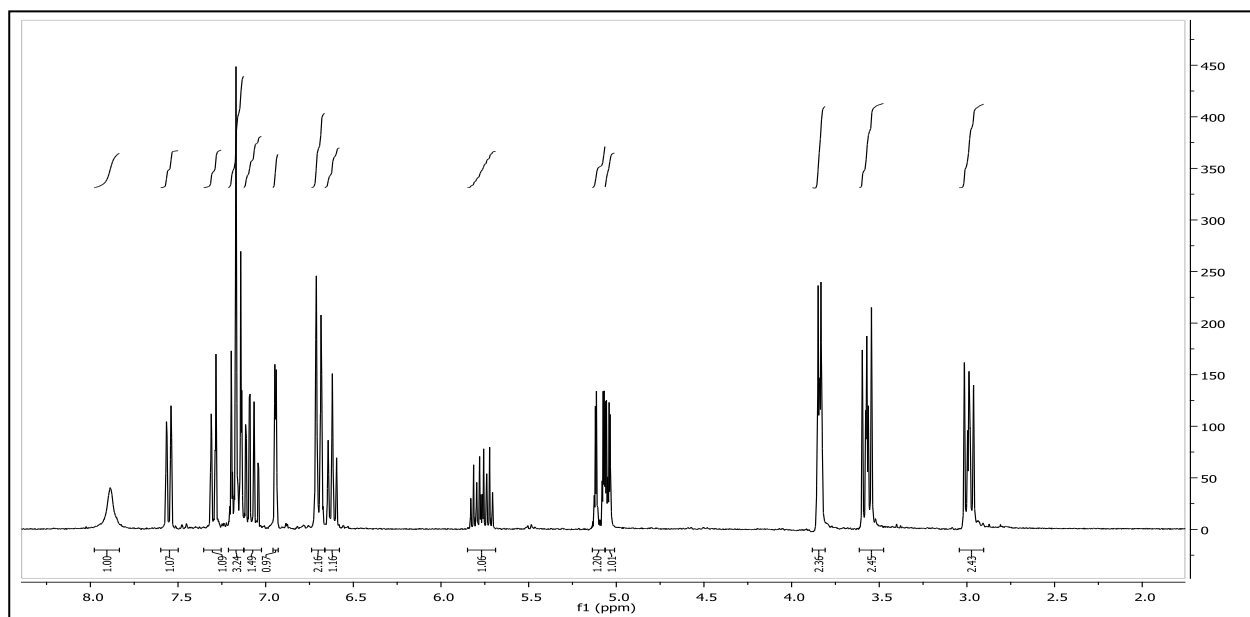

**<sup>13</sup>C NMR of *N*-allyl-*N*-phenyltryptamine (1g)**

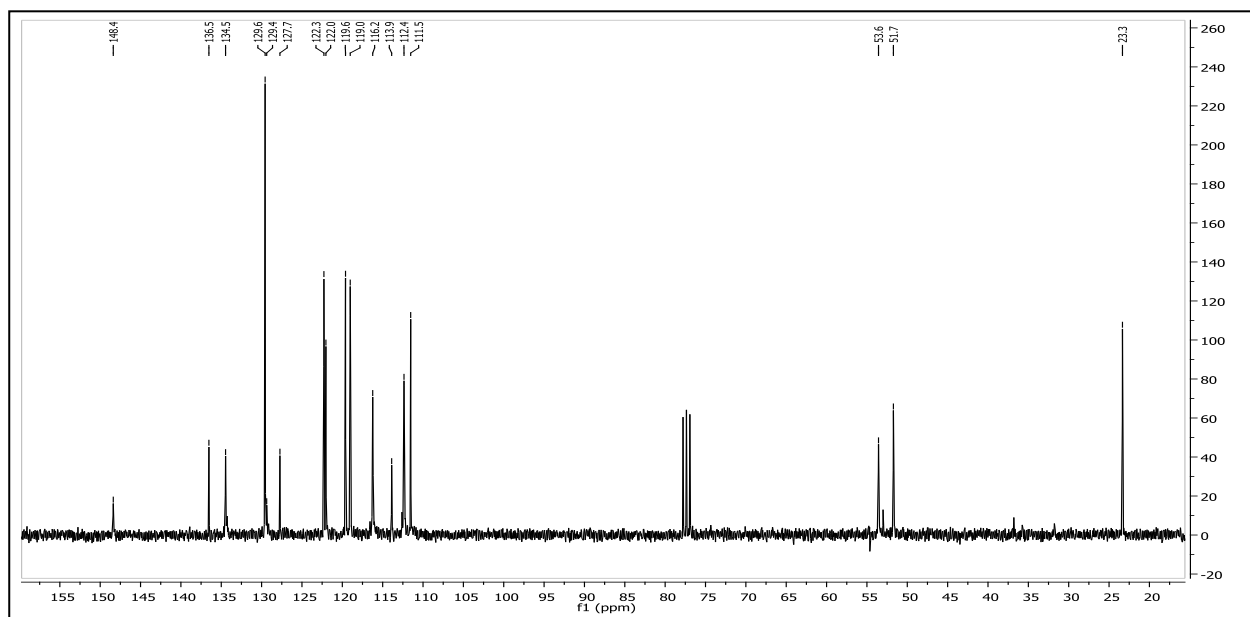

### *N*-Allyl-*N*-methyltryptamine (1h)

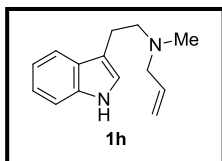

### RP-HPLC of *N*-allyl-*N*-methyltryptamine (1h)

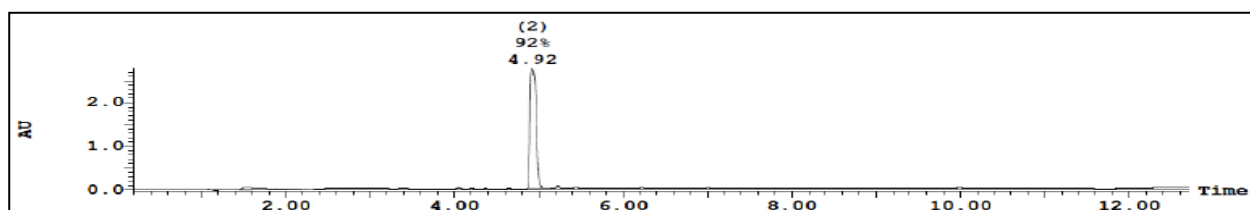

### IR of *N*-allyl-*N*-methyltryptamine (1h)

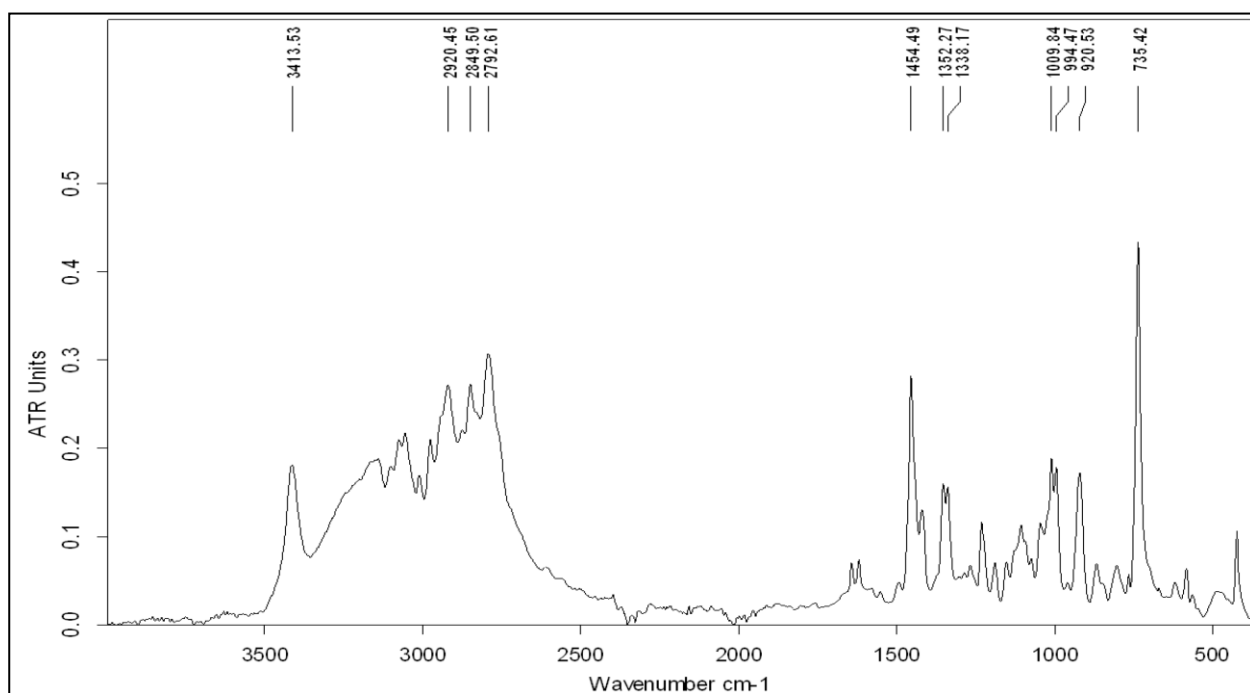



**<sup>1</sup>H NMR of *N*-allyl-*N*-methyltryptamine (1h)**

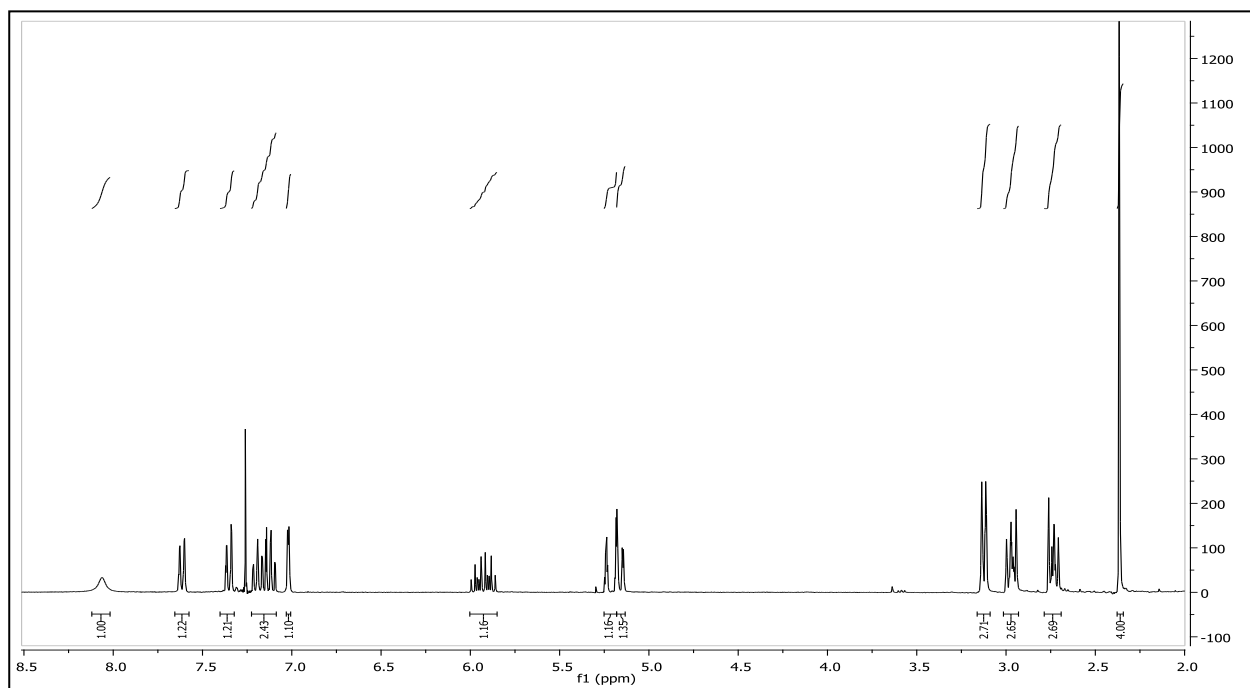

**<sup>13</sup>C NMR of *N*-allyl-*N*-methyltryptamine (1h)**

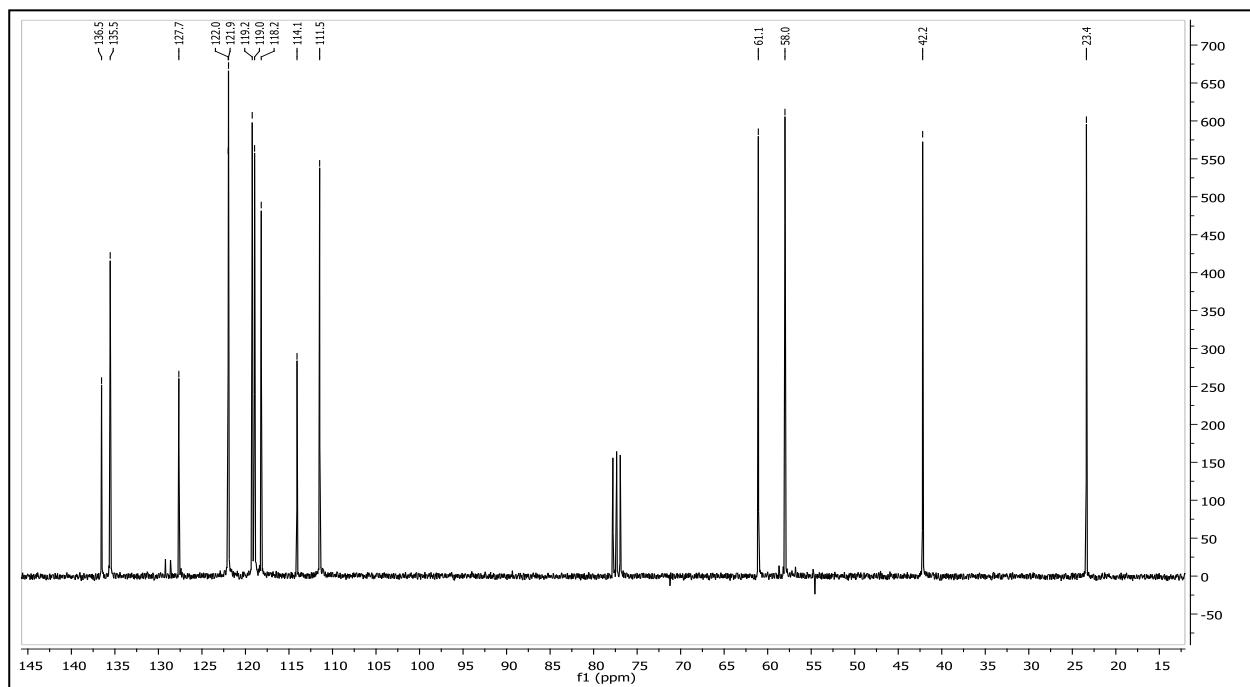

***N*-Allyl-*N*-benzyl-(5-methoxy)tryptamine (1i)**

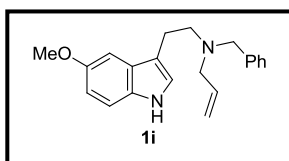

**RP-HPLC of *N*-allyl-*N*-benzyl-(5-methoxy)tryptamine (1i)**

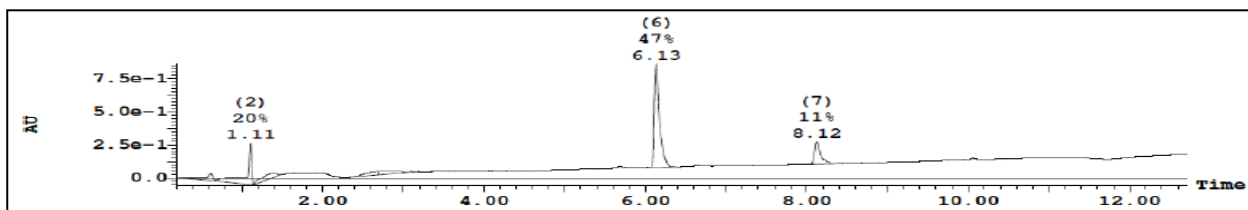

**IR of *N*-allyl-*N*-benzyl-5-(methoxy)tryptamine (1i)**

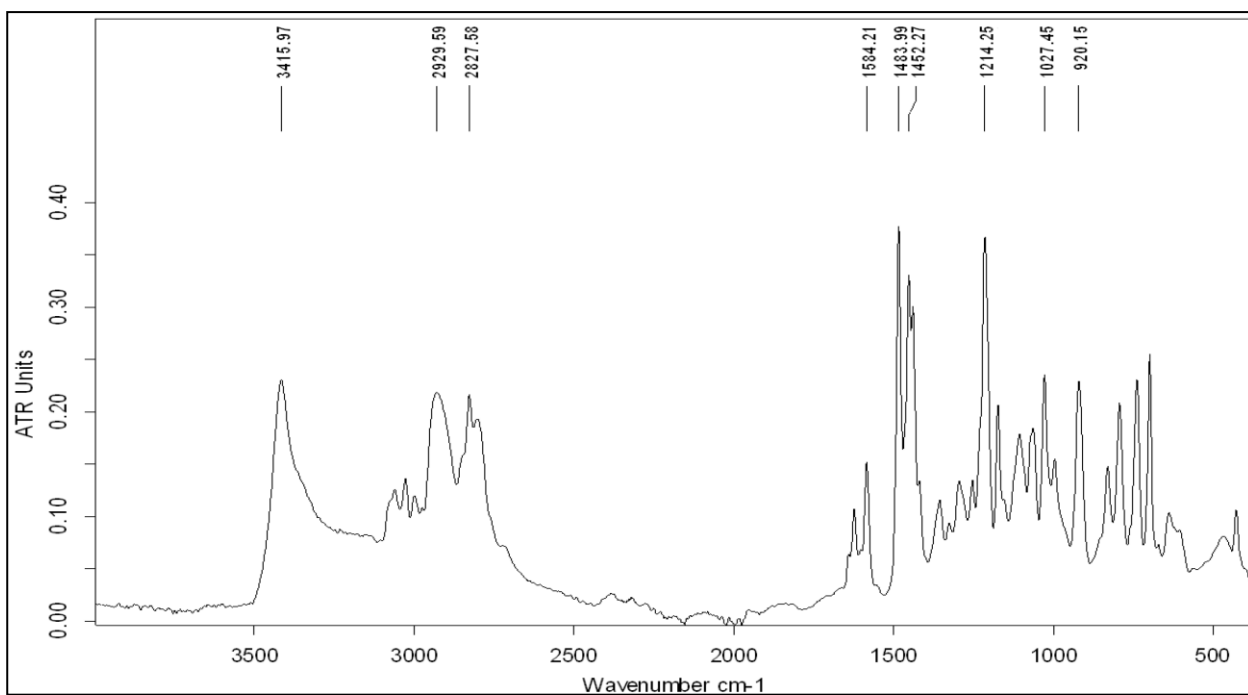

**<sup>1</sup>H NMR of *N*-allyl-*N*-benzyl-(5-methoxy)tryptamine (1i)**

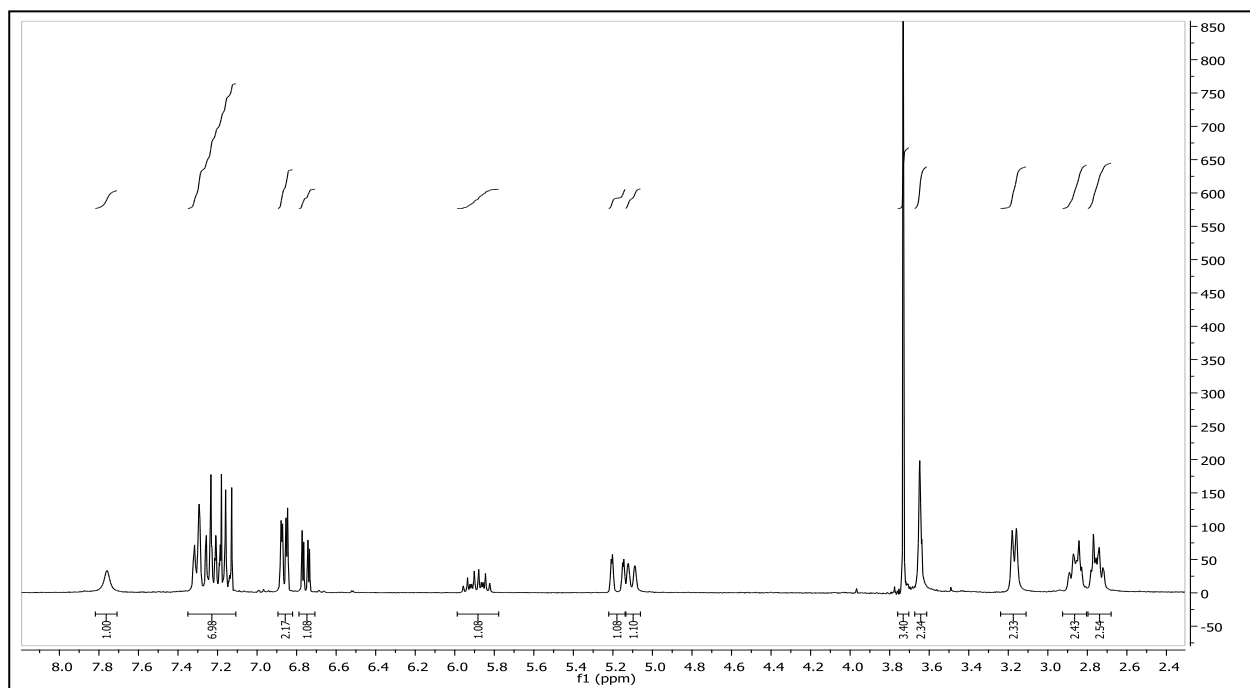

**<sup>13</sup>C NMR of *N*-allyl-*N*-benzyl-(5-methoxy)tryptamine (1i)**

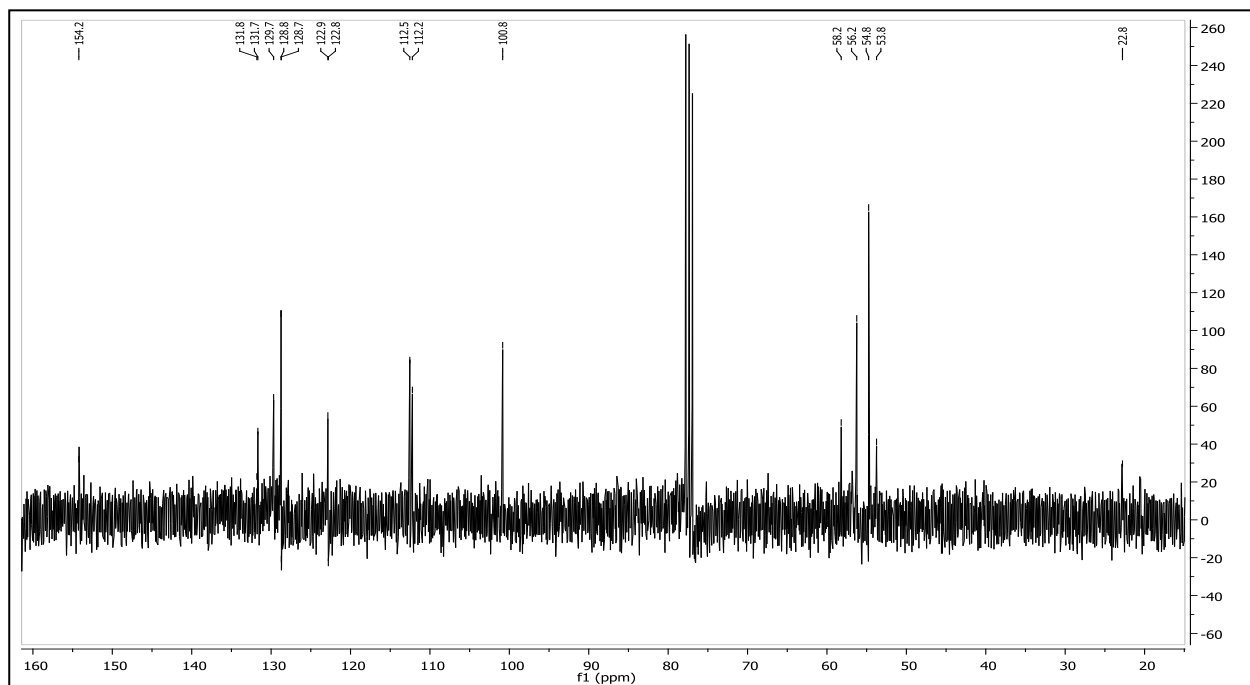

***N*-Allyl-*N*-benzyl-(6-methoxy)tryptamine (1j)**

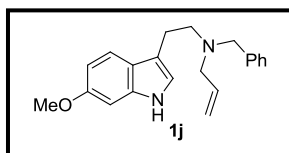

**RP-HPLC of *N*-allyl-*N*-benzyl-(6-methoxy)tryptamine (1j)**

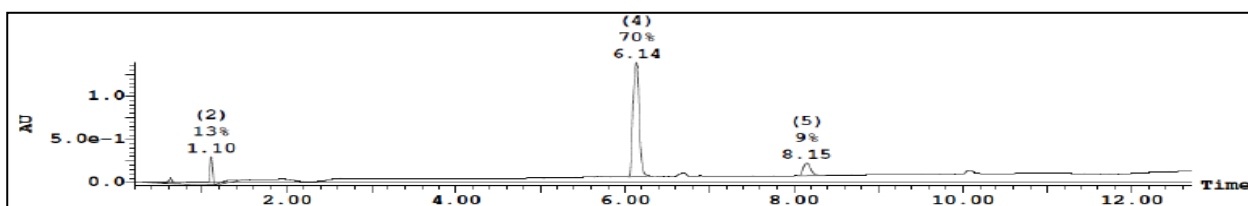

**IR of *N*-allyl-*N*-benzyl-(6-methoxy)tryptamine (1j)**

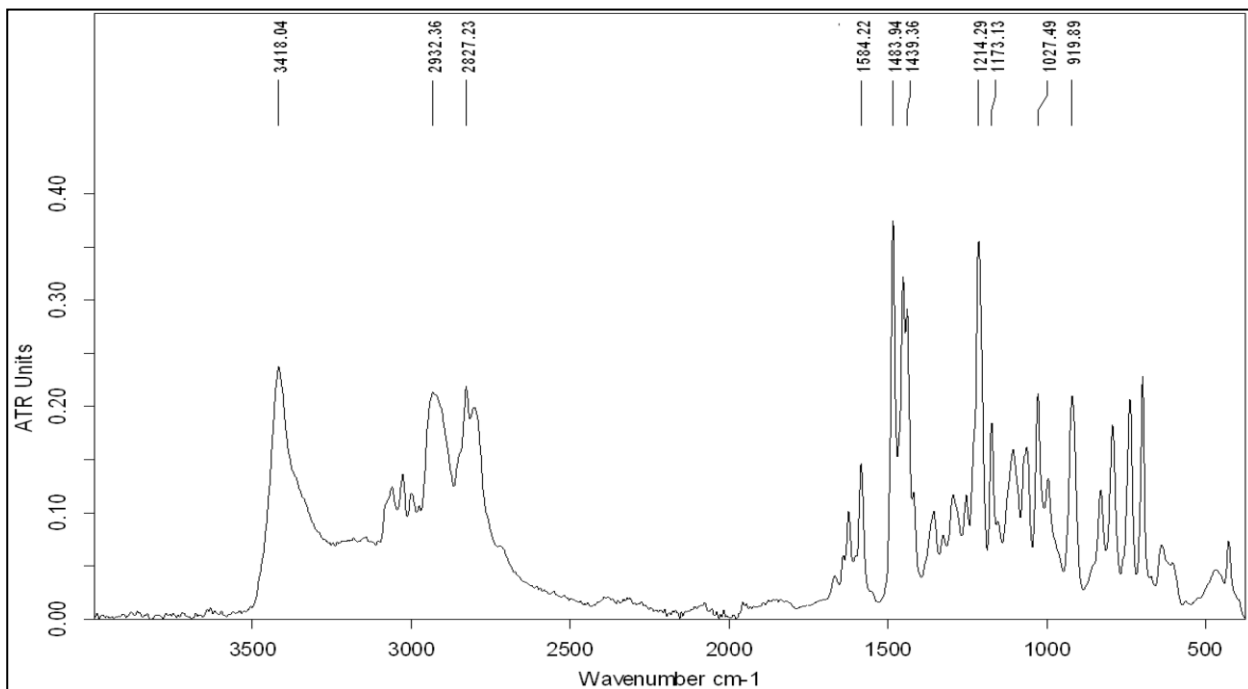

**<sup>1</sup>H NMR of *N*-allyl-*N*-benzyl-(6-methoxy)tryptamine (1j)**

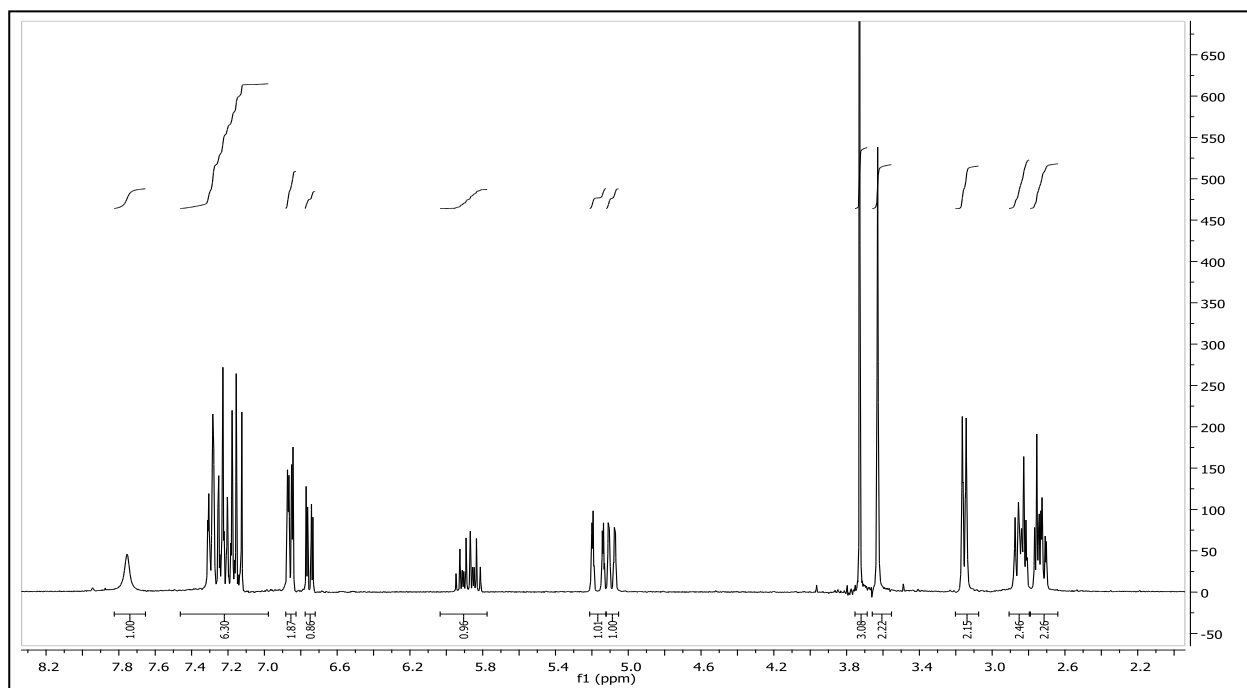

**<sup>13</sup>C NMR of *N*-allyl-*N*-benzyl-(6-methoxy)tryptamine (1j)**

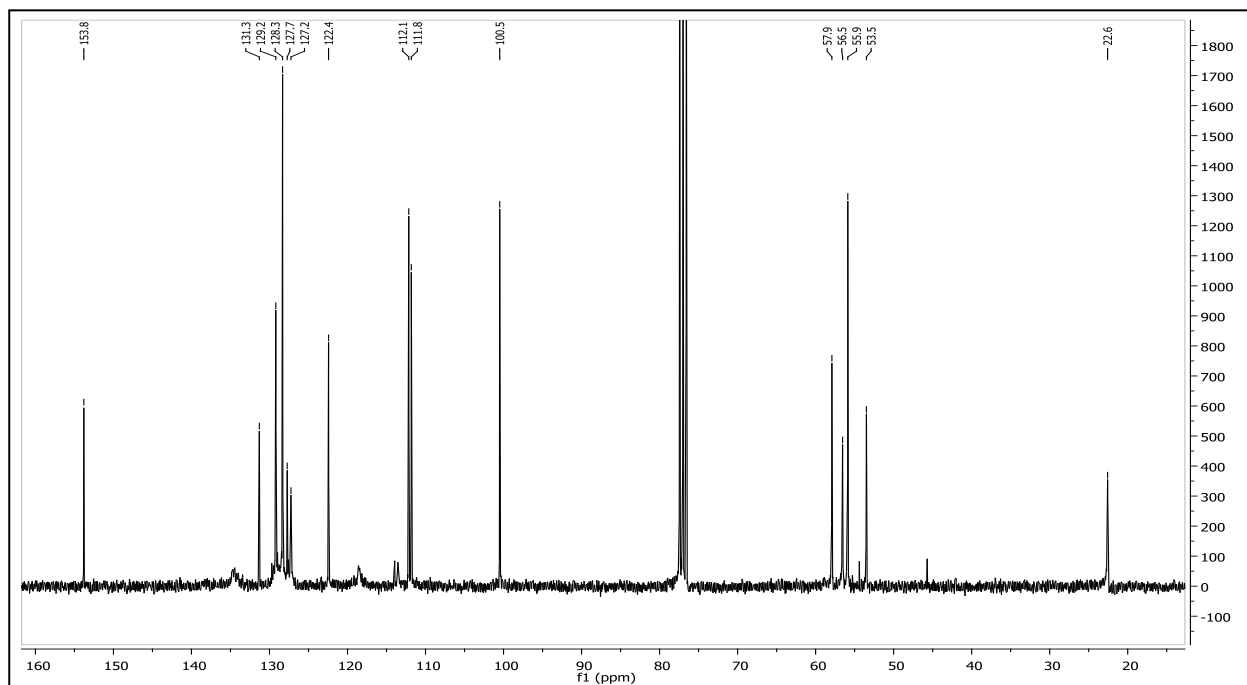

***N*-Allyl-*N*-benzyl-(7-methyl)tryptamine (1k)**

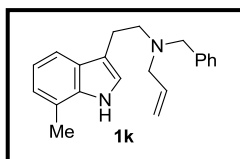

**RP-HPLC of *N*-allyl-*N*-benzyl-(7-methyl)tryptamine (1k)**

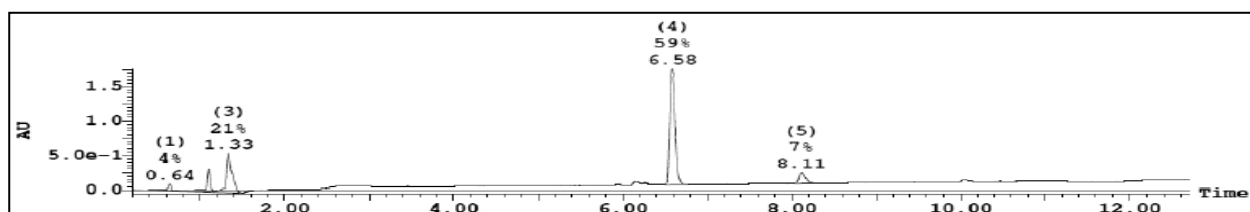

**IR of *N*-allyl-*N*-benzyl-(7-methyl)tryptamine (1k)**

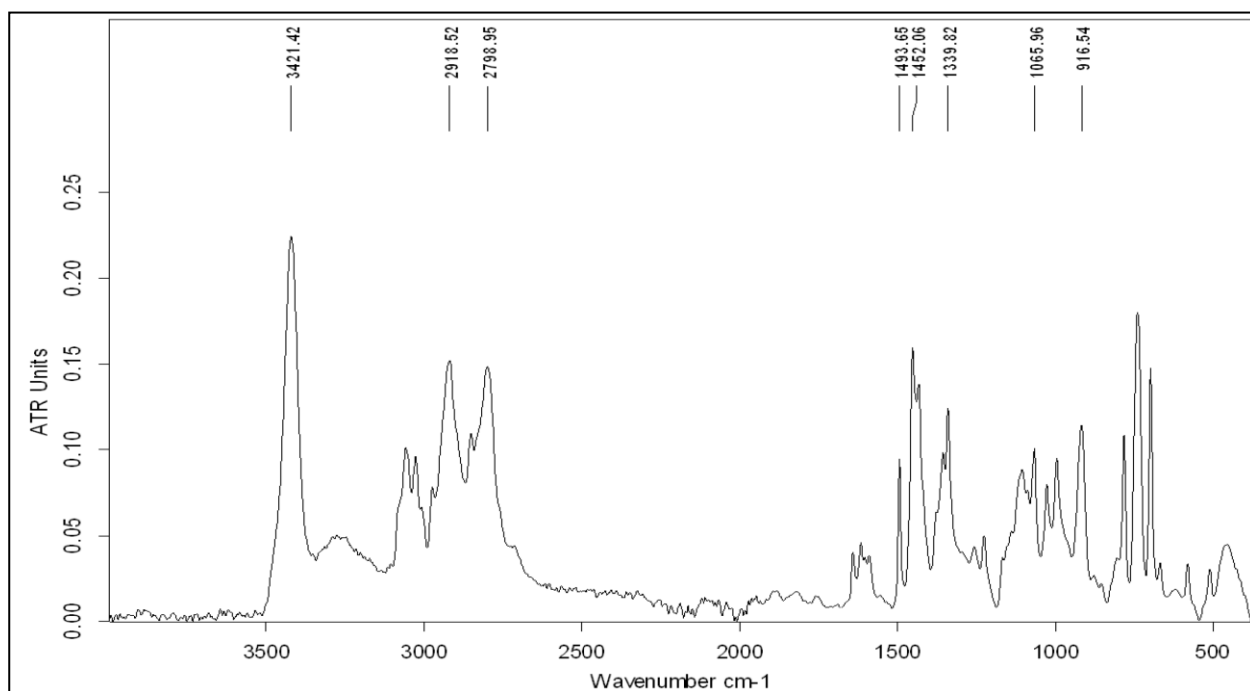

**<sup>1</sup>H NMR of *N*-allyl-*N*-benzyl-(7-methyl)tryptamine (1k)**

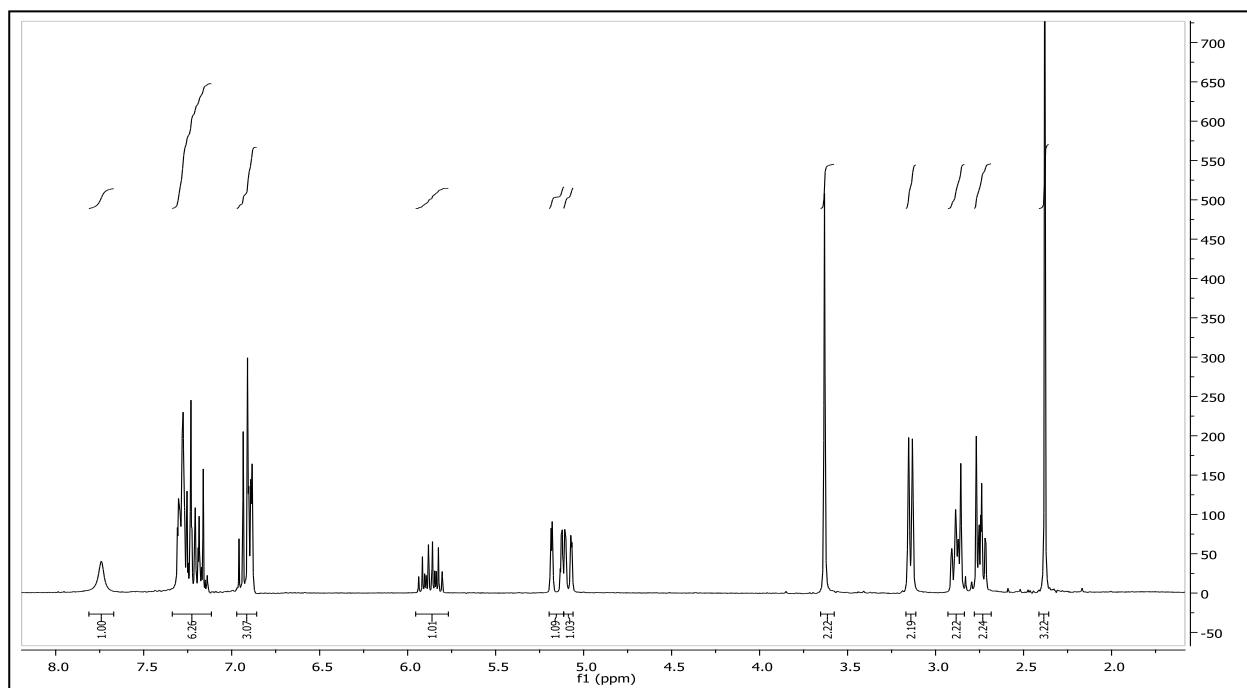

**<sup>13</sup>C NMR of *N*-allyl-*N*-benzyl-(7-methyl)tryptamine (1k)**

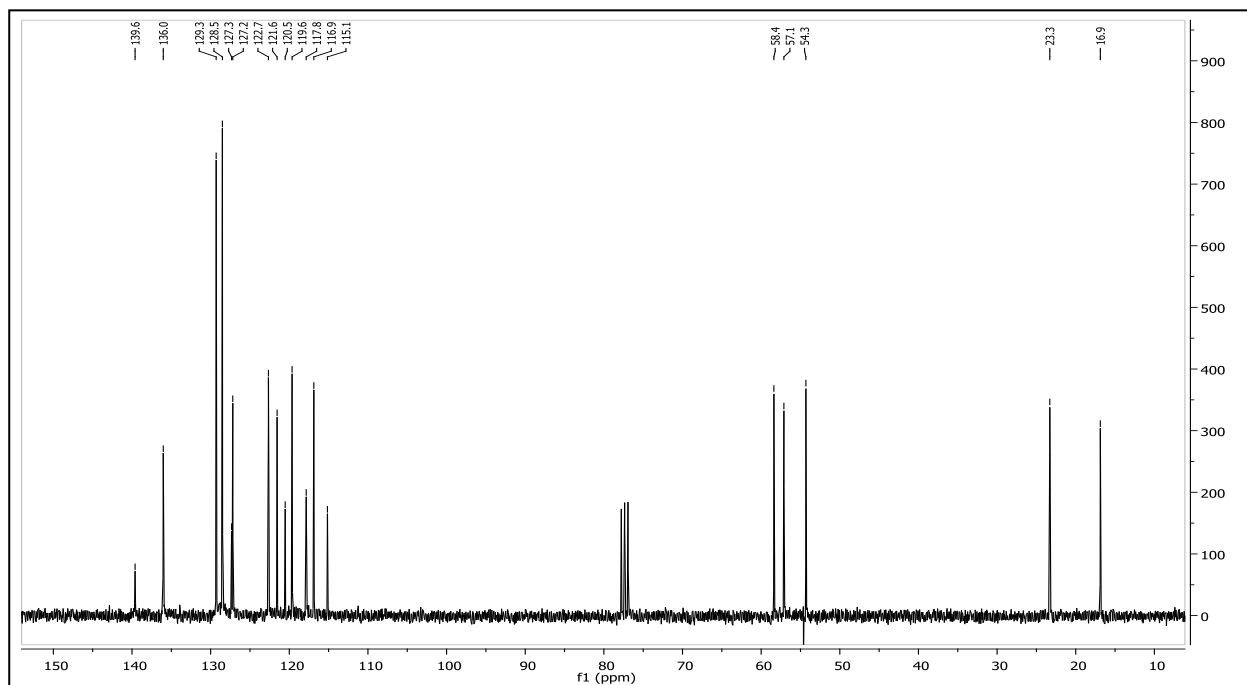

***N*-Allyl-*N*-benzyl-(5-methyl)tryptamine (11)**

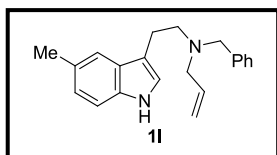

**RP-HPLC of *N*-allyl-*N*-benzyl-(5-methyl)tryptamine (11)**

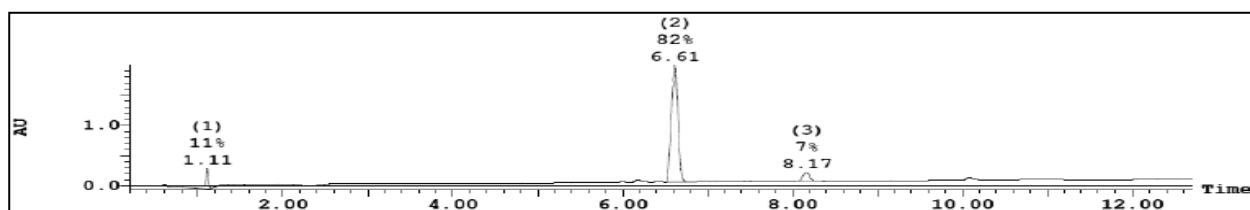

**IR of *N*-allyl-*N*-benzyl-(5-methyl)tryptamine (11)**

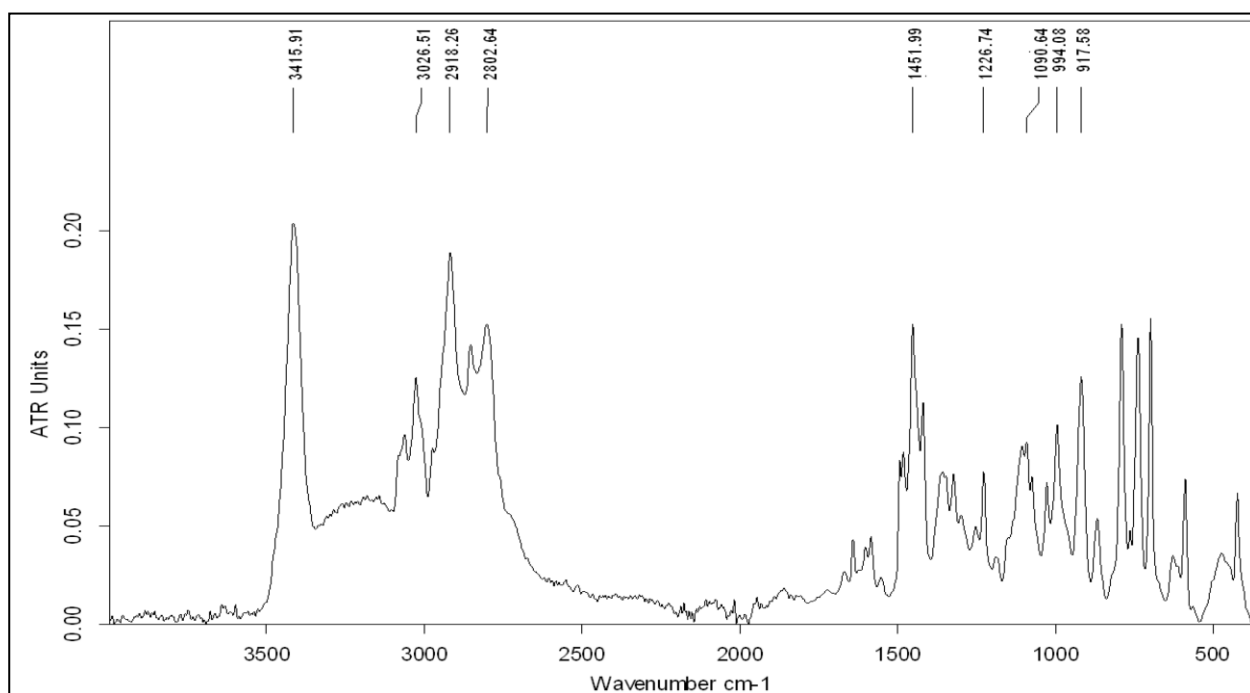



**<sup>1</sup>H NMR of *N*-allyl-*N*-benzyl-(5-methyl)tryptamine (11)**

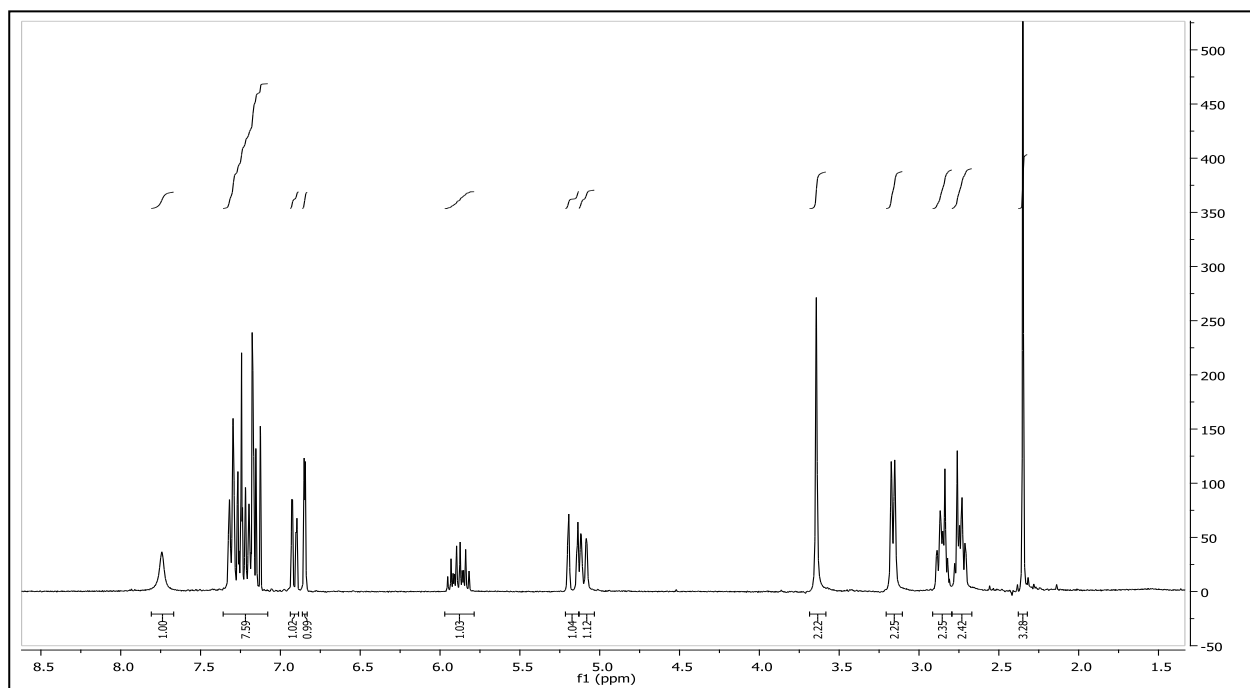

**<sup>13</sup>C NMR of *N*-allyl-*N*-benzyl-(5-methyl)tryptamine (11)**

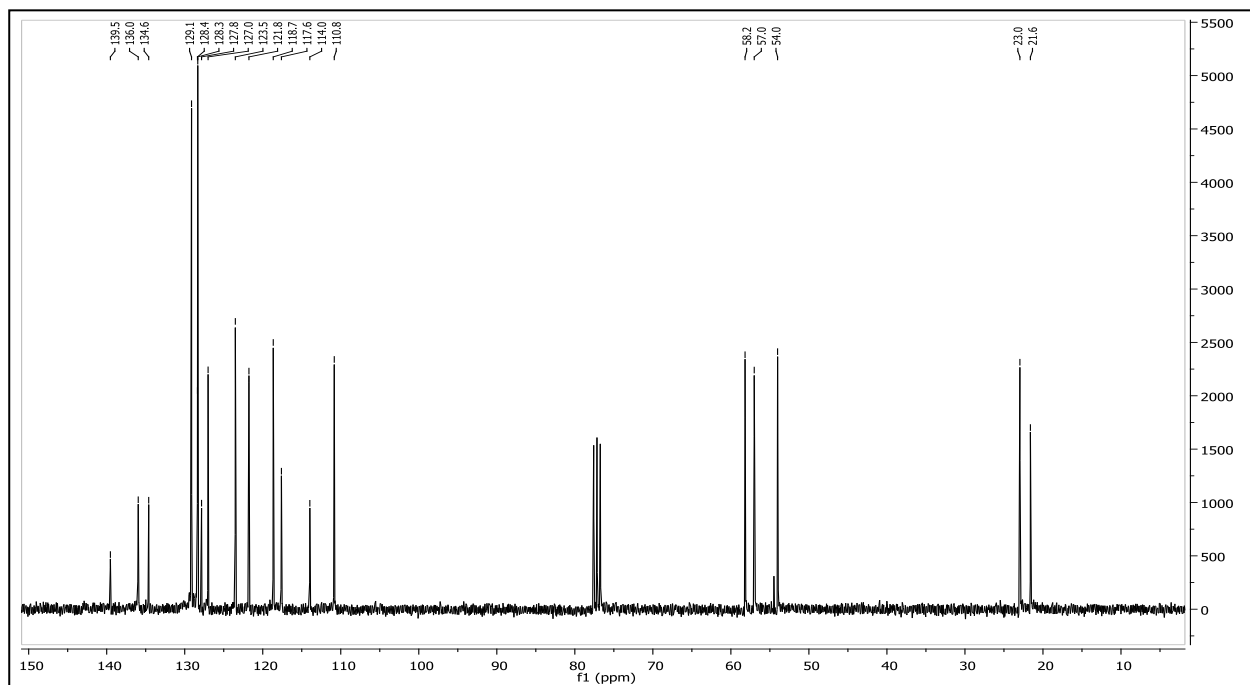

***N*-Allyl-*N*-benzyl-(5-fluoro)tryptamine (1m)**

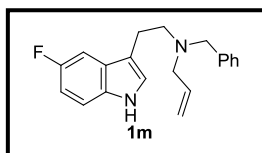

**RP-HPLC of *N*-allyl-*N*-benzyl-(5-fluoro)tryptamine (1m)**

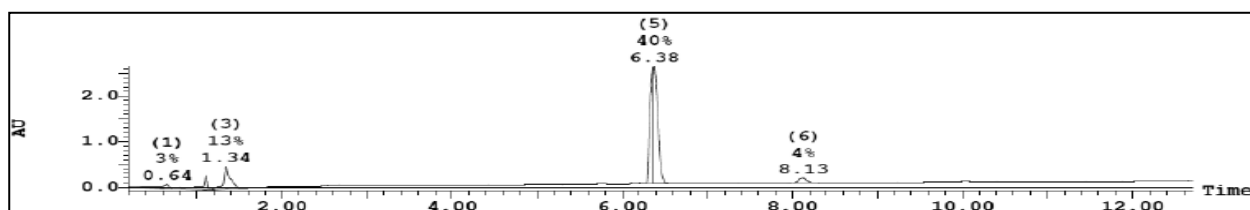

**IR of *N*-allyl-*N*-benzyl-(5-fluoro)tryptamine (1m)**

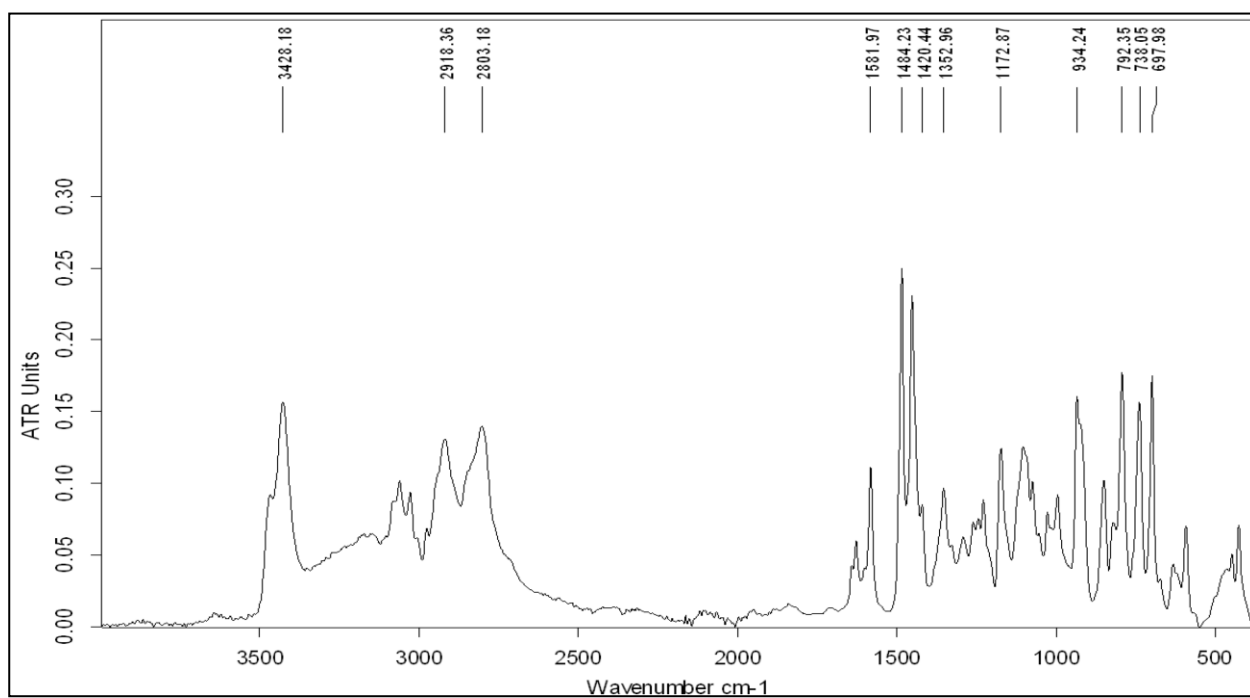

**<sup>1</sup>H NMR of *N*-allyl-*N*-benzyl-(5-fluoro)tryptamine (1m)**

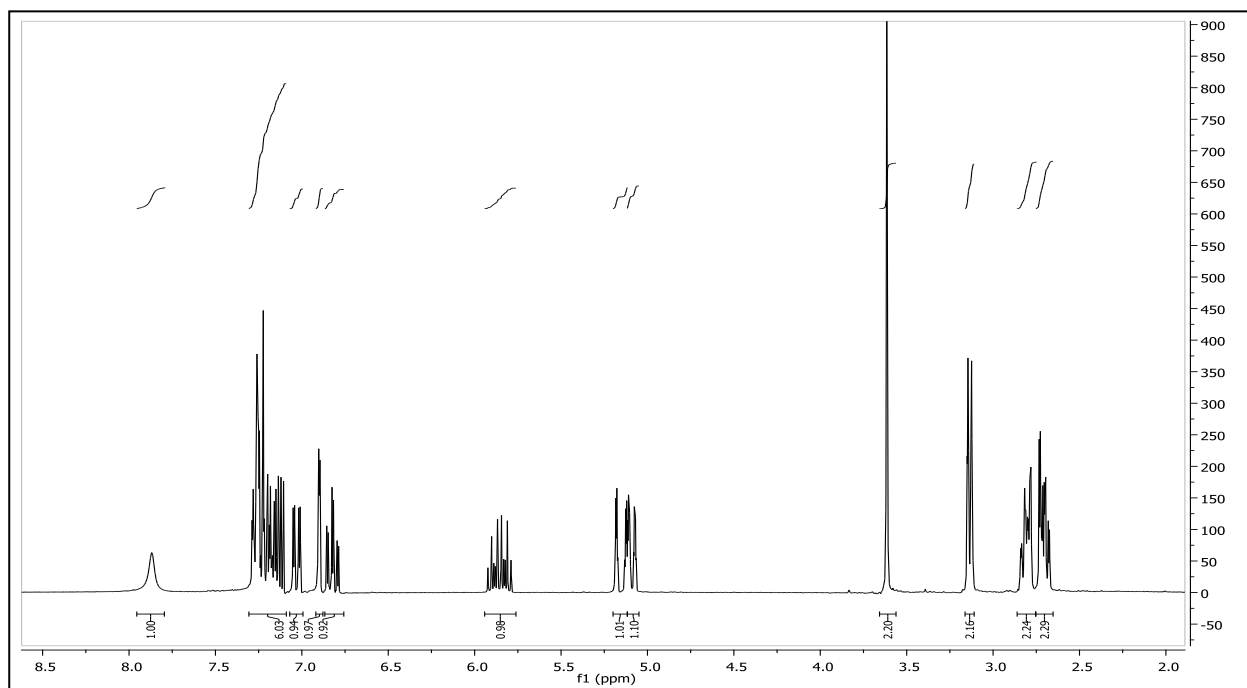

**<sup>13</sup>C NMR of *N*-allyl-*N*-benzyl-(5-fluoro)tryptamine (1m)**

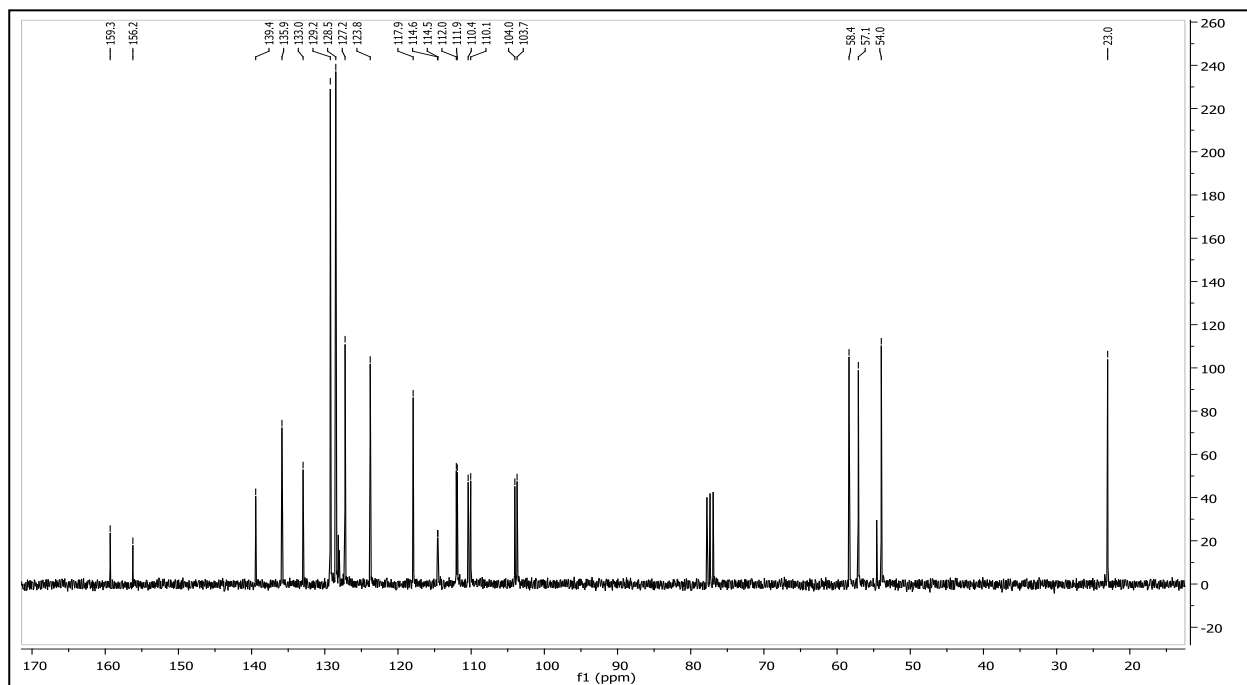

***N*-Allyl-*N*-benzyl-(5-bromo)tryptamine (1n)**

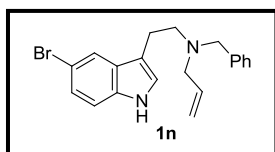

**RP-HPLC of *N*-allyl-*N*-benzyl-(5-bromo)tryptamine (1n)**

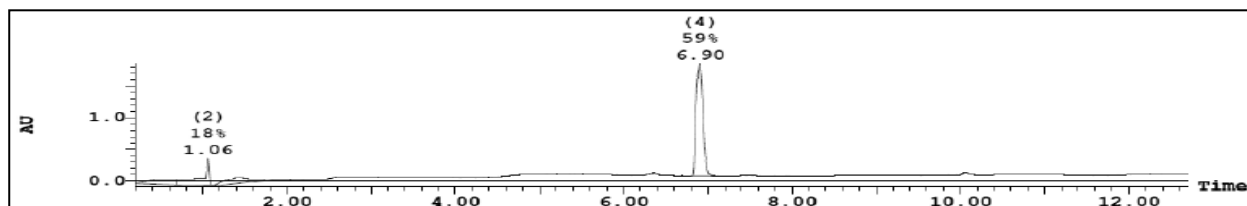

**IR of *N*-allyl-*N*-benzyl-(5-bromo)tryptamine (1n)**

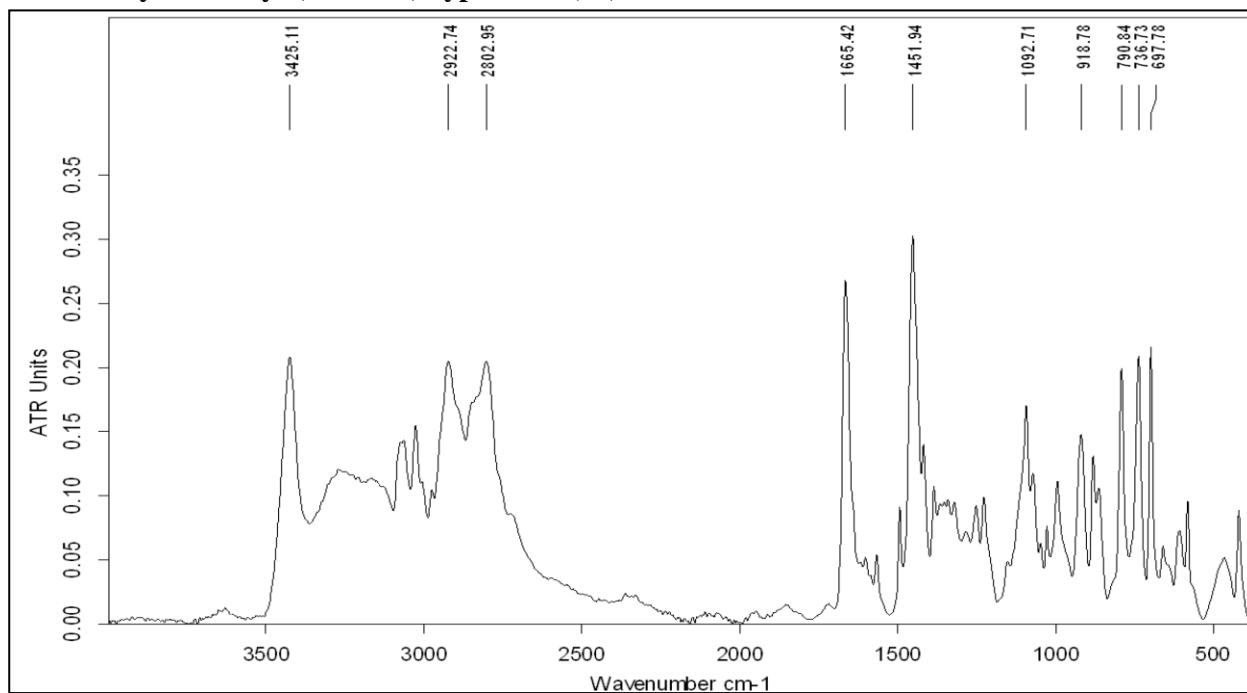

**<sup>1</sup>H NMR of *N*-allyl-*N*-benzyl-(5-bromo)tryptamine (1n)**

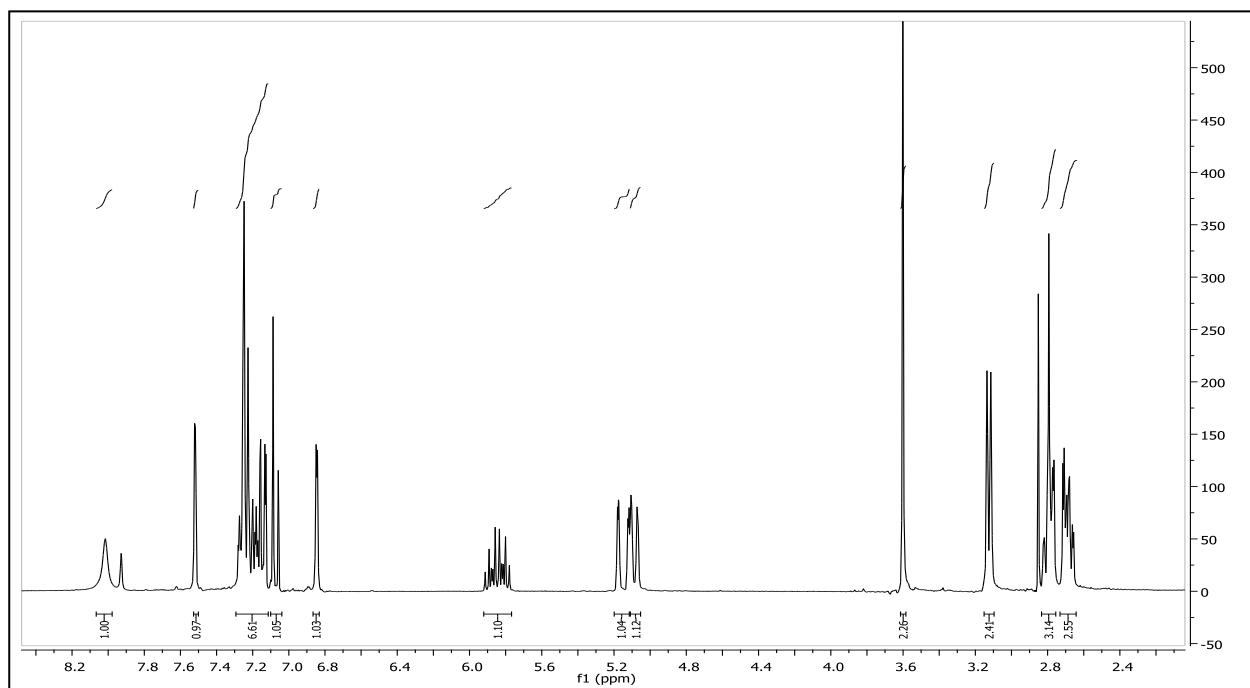

**<sup>13</sup>C NMR of *N*-allyl-*N*-benzyl-(5-bromo)tryptamine (1n)**

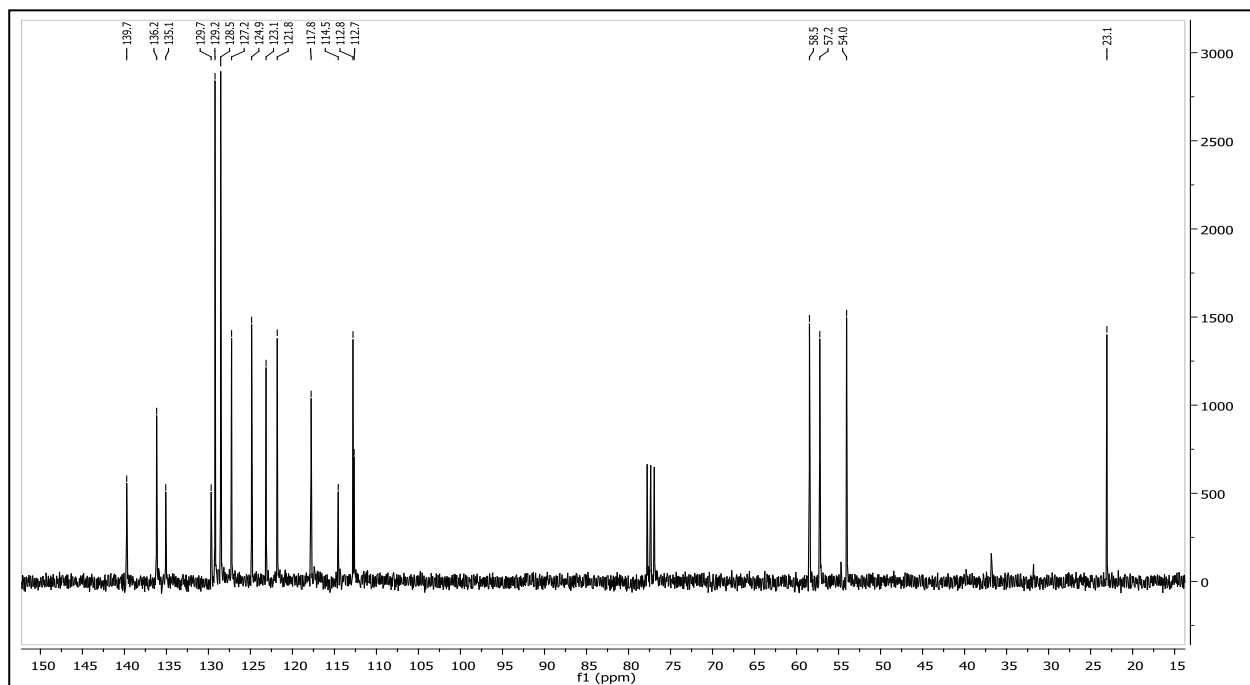

***N*-Benzyl-*N*-(3,3-dimethyl)allyltryptamine (1o)**

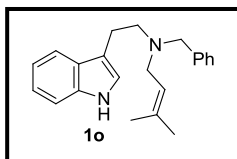

**RP-HPLC of *N*-benzyl-*N*-(3,3-dimethyl)allyltryptamine (1o)**

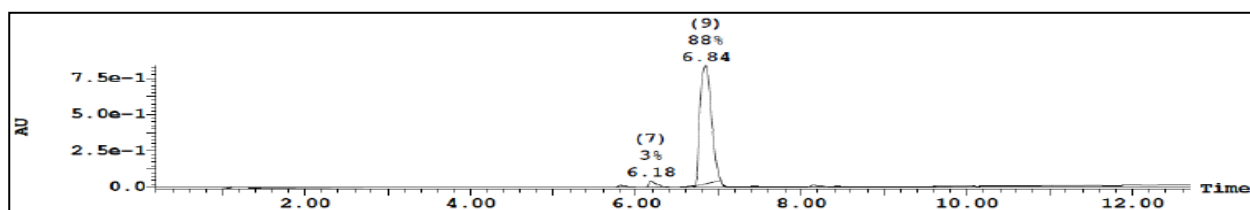

**IR of *N*-benzyl-*N*-(3,3-dimethyl)allyltryptamine (1o)**

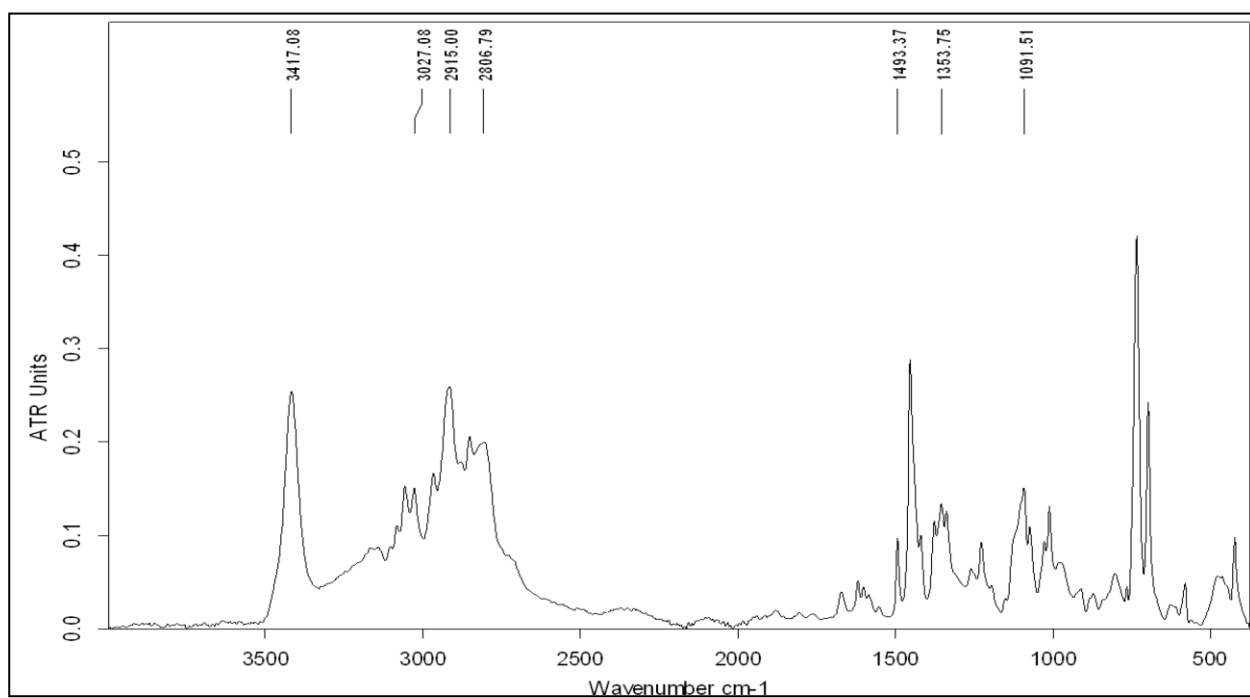

**<sup>1</sup>H NMR of *N*-benzyl-*N*-(3,3-dimethyl)allyltryptamine (1o)**

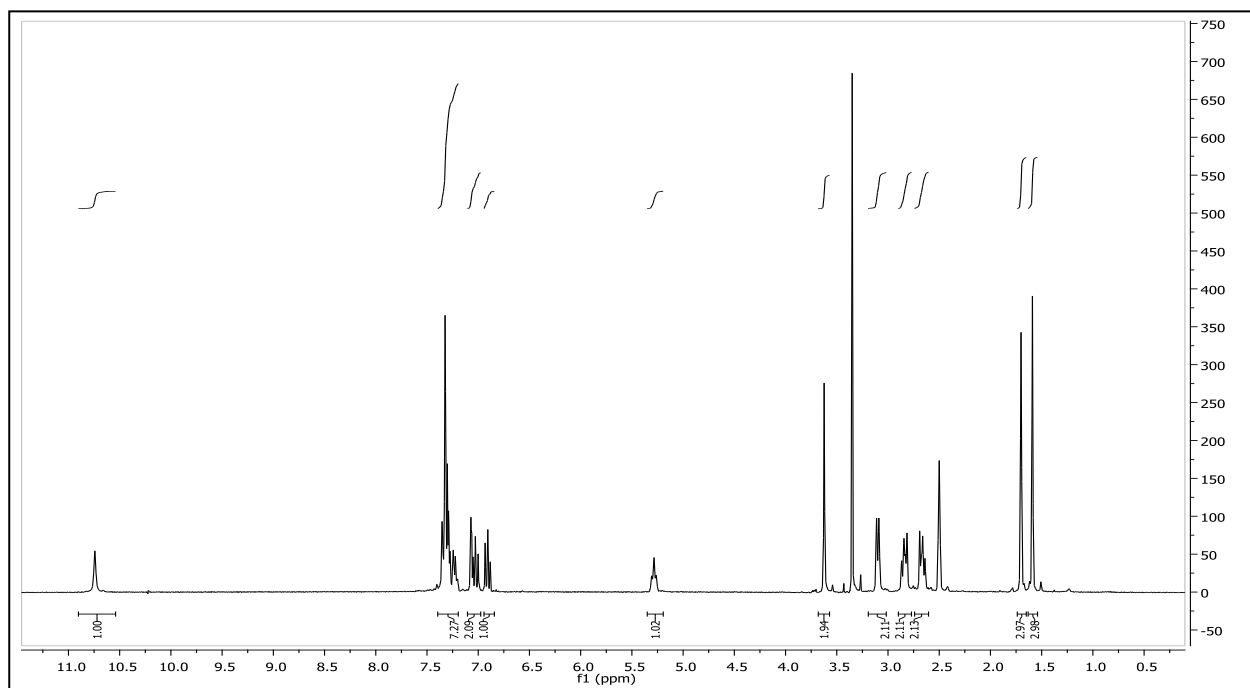

**<sup>13</sup>C NMR of *N*-benzyl-*N*-(3,3-dimethyl)allyltryptamine (1o)**

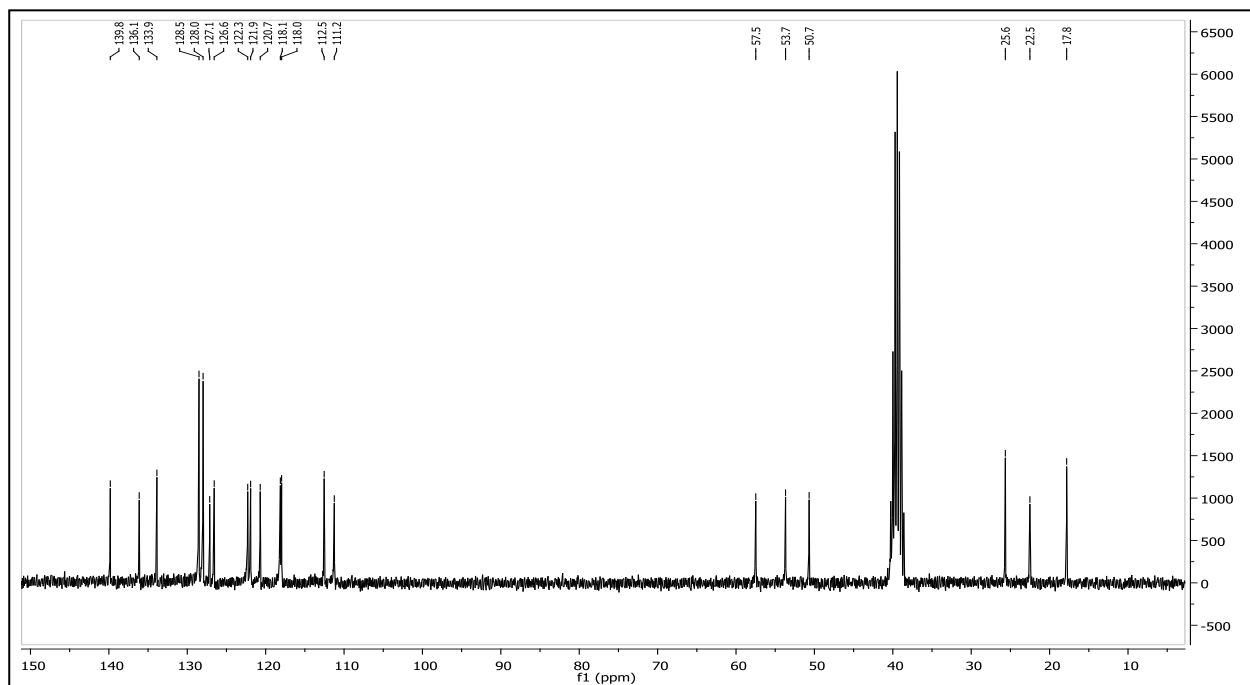

### *N*-Benzyl-*N*-crotyltryptamine (1p)

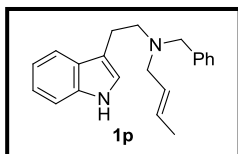

### RP-HPLC of *N*-benzyl-*N*-crotyltryptamine (1p)

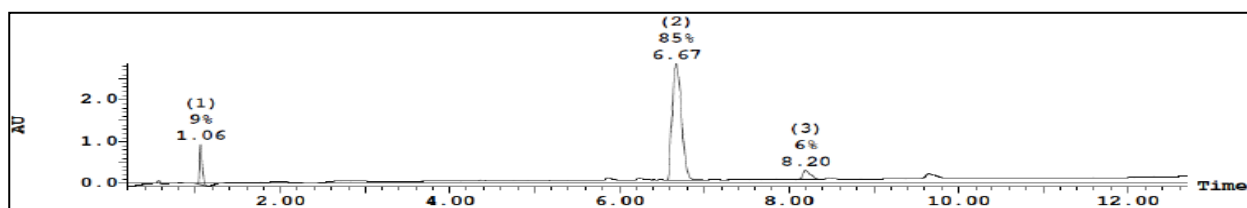

### IR of *N*-benzyl-*N*-crotyltryptamine (1p)

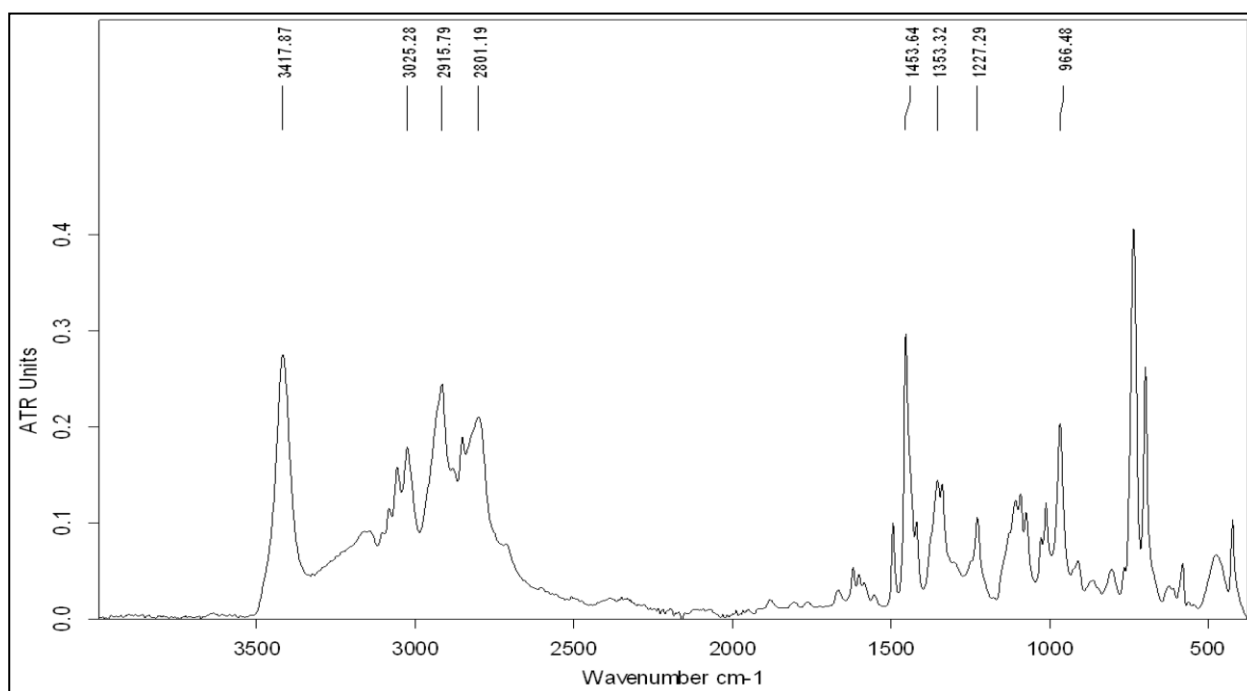



**<sup>1</sup>H NMR of *N*-benzyl-*N*-crotyltryptamine (1p)**

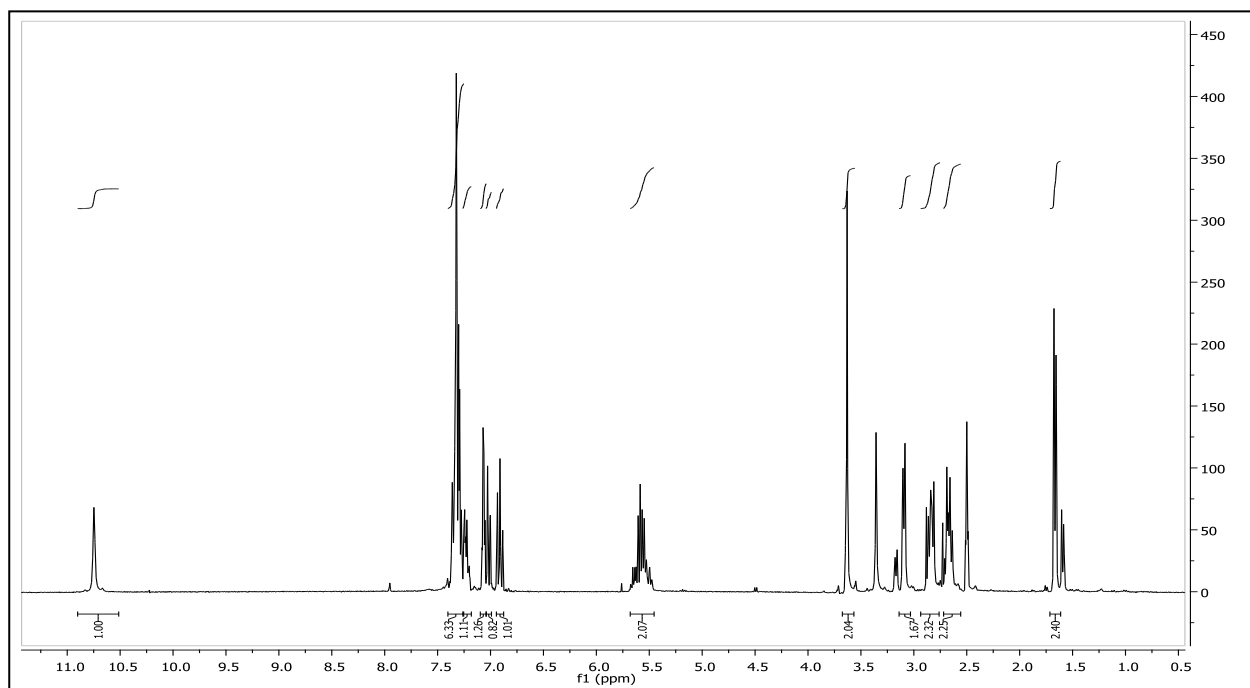

**<sup>13</sup>C NMR of *N*-benzyl-*N*-crotyltryptamine (1p)**

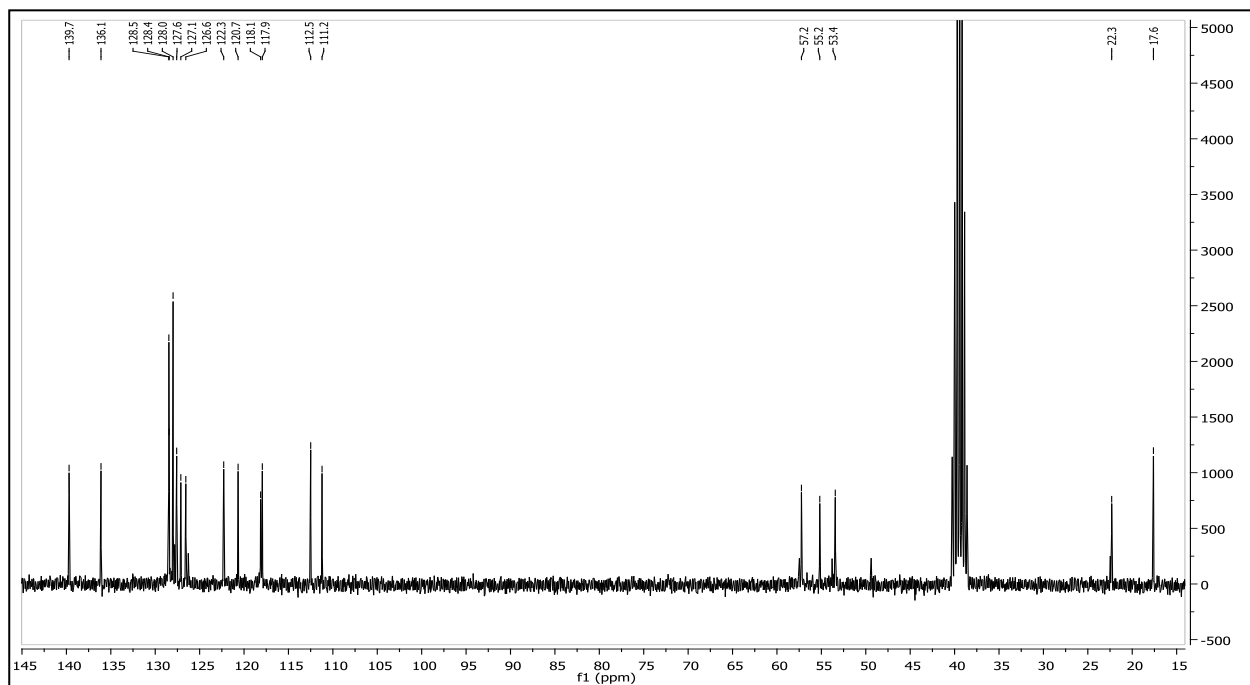

***N*-Benzyl-*N*-3-phenylprop-2-en-1-tryptamine (1q)**

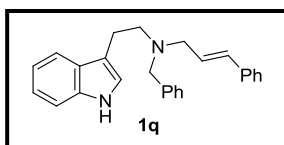

**RP-HPLC of *N*-benzyl-*N*-3-phenylprop-2-en-1-tryptamine (1q)**

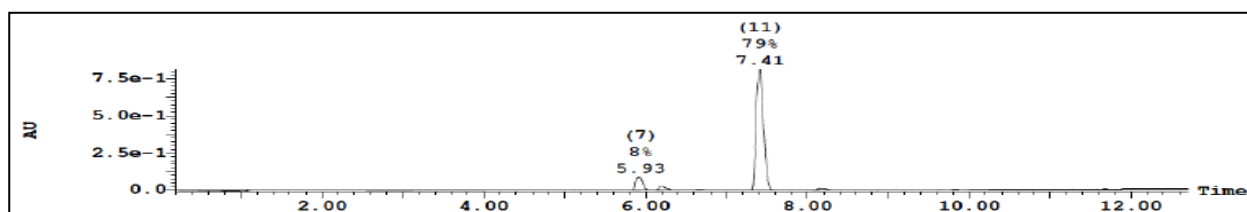

**IR of *N*-benzyl-*N*-3-phenylprop-2-en-1-tryptamine (1q)**

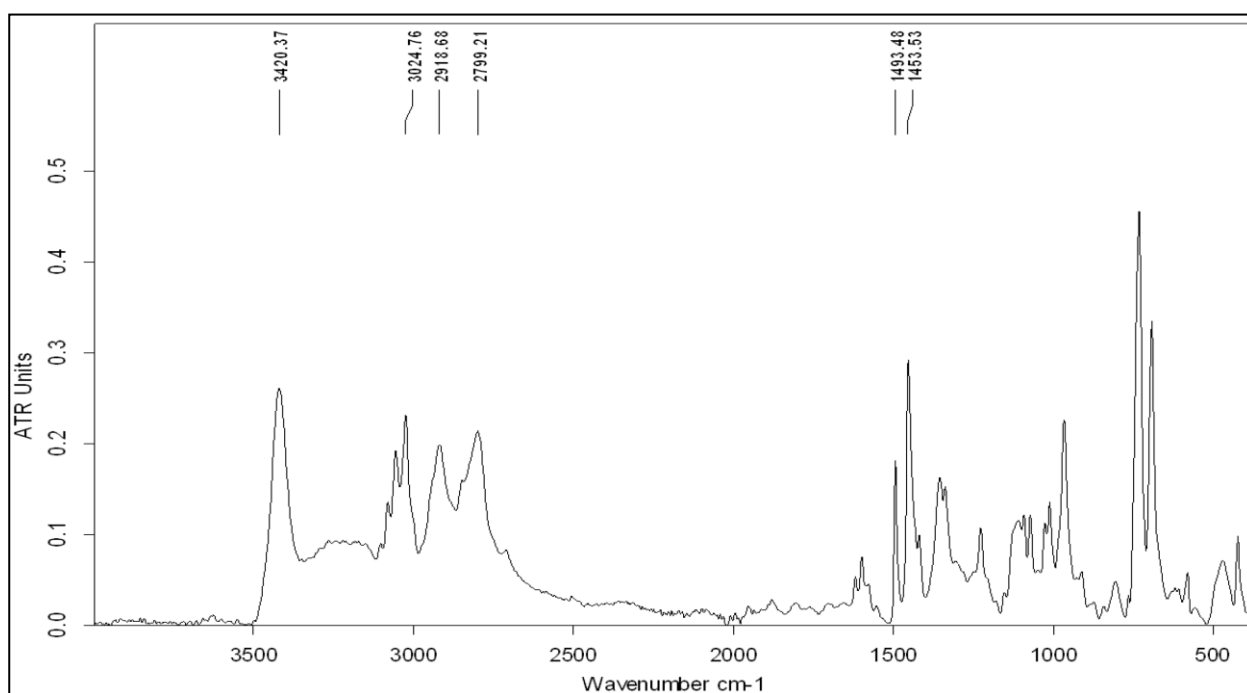

**<sup>1</sup>H NMR of *N*-benzyl-*N*-3-phenylprop-2-en-1-tryptamine (1q)**

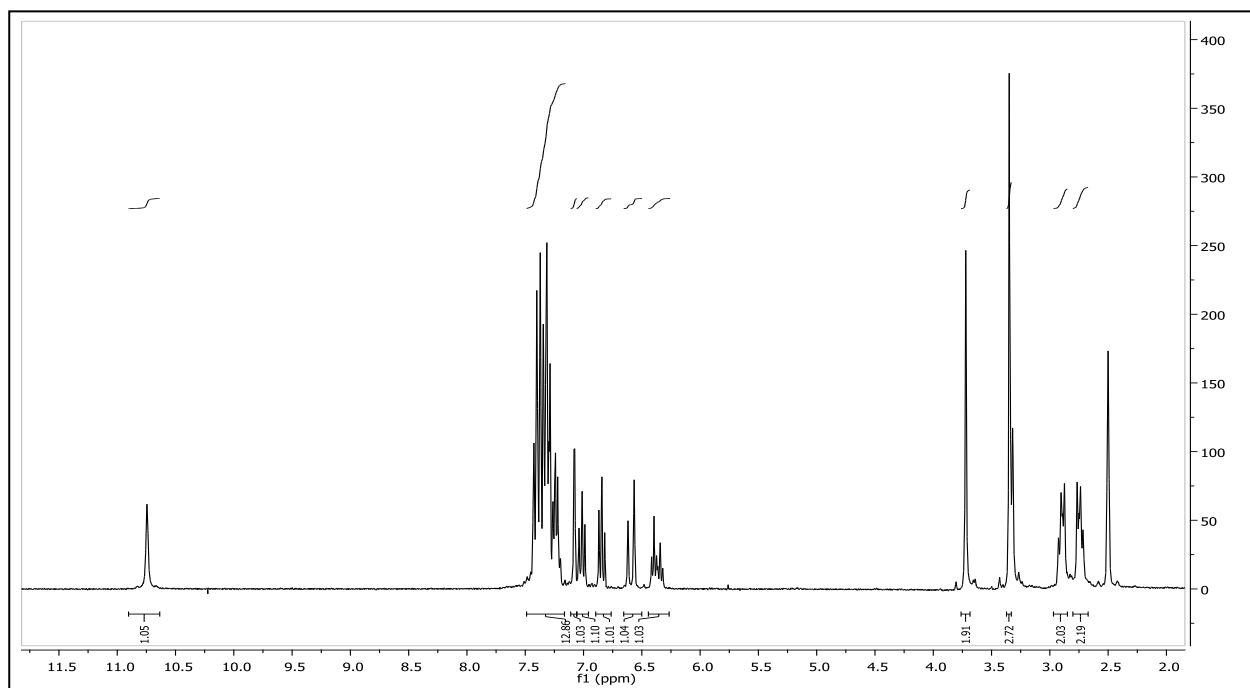

**<sup>13</sup>C NMR of *N*-benzyl-*N*-3-phenylprop-2-en-1-tryptamine (1q)**

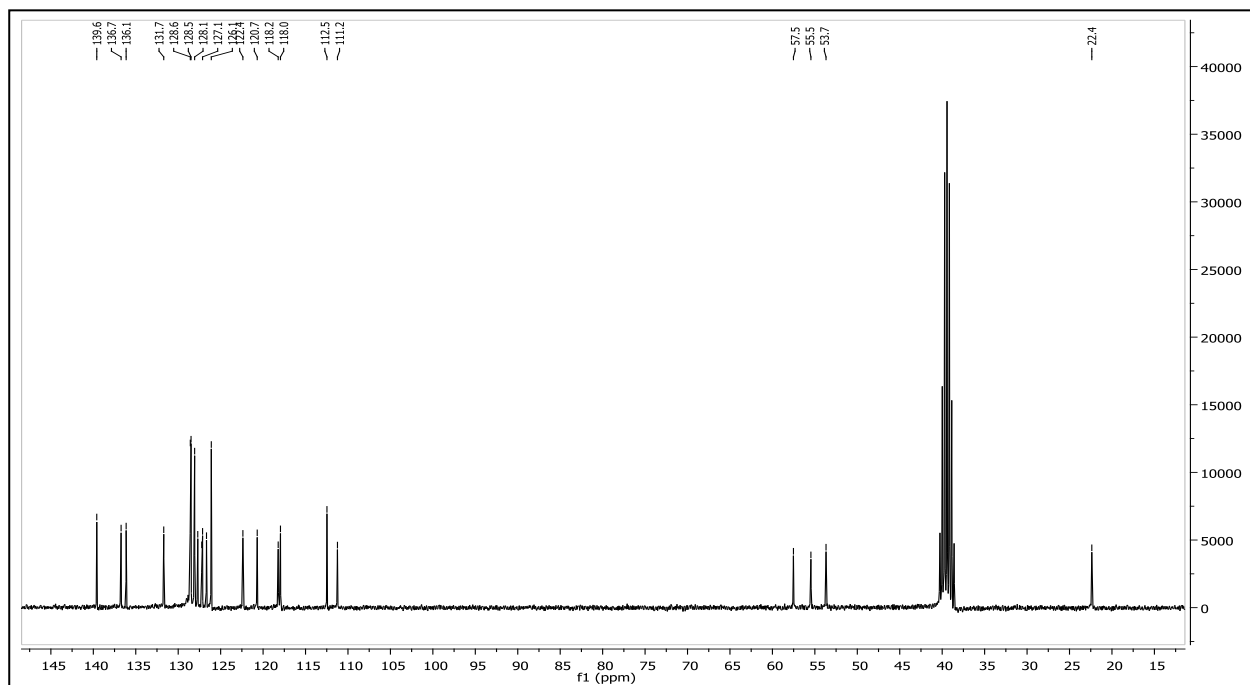

***N*-Benzyl-*N*-3-(4-nitrophenyl)prop-2-en-1-tryptamine (1r)**

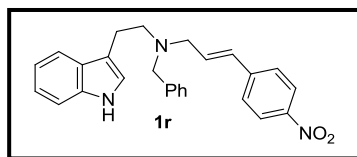

**RP-HPLC of *N*-benzyl-*N*-3-(4-nitrophenyl)prop-2-en-1-tryptamine (1r)**

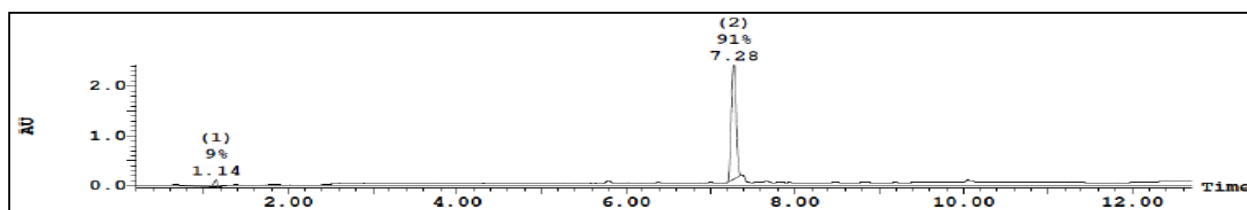

**IR of *N*-benzyl-*N*-3-(4-nitrophenyl)prop-2-en-1-tryptamine (1r)**

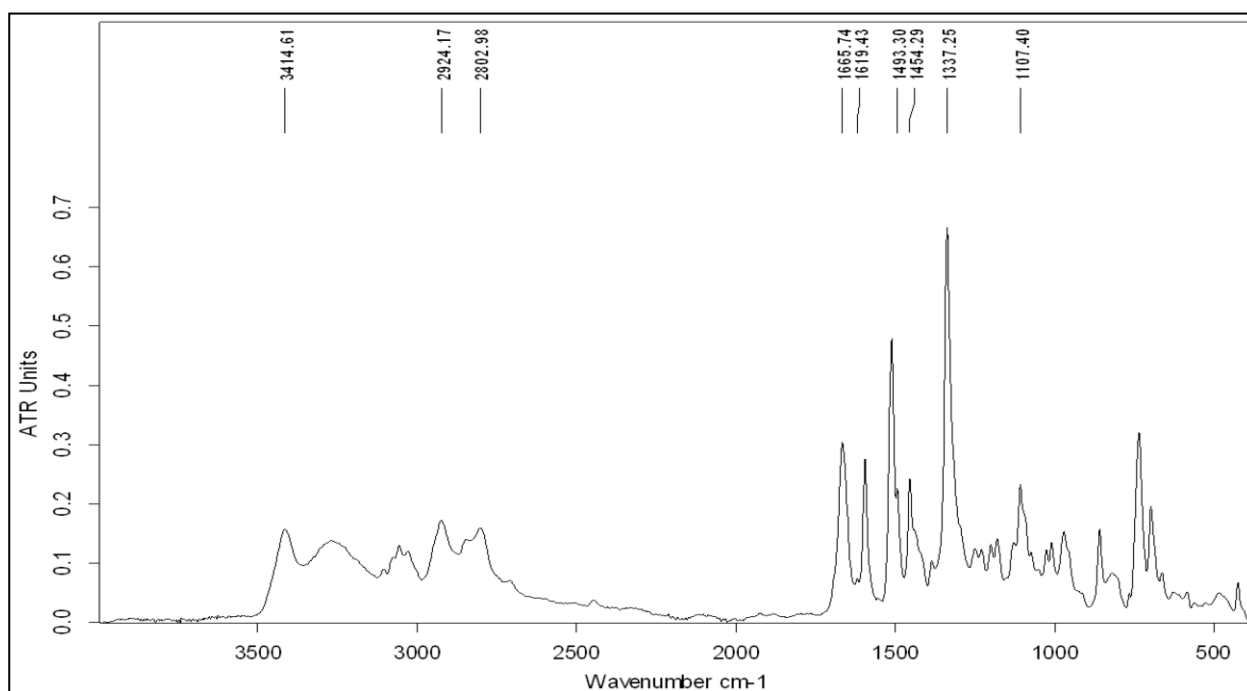

**<sup>1</sup>H NMR of *N*-benzyl-*N*-3-(4-nitrophenyl)prop-2-en-1-tryptamine (1r)**

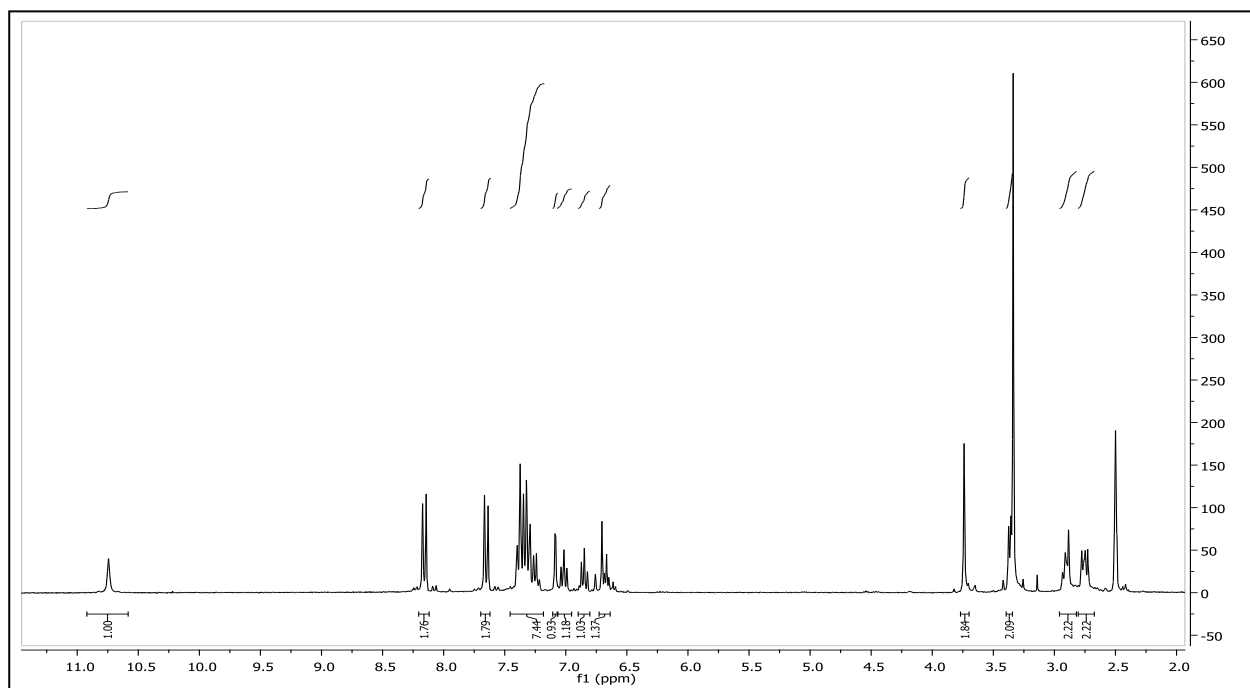

**<sup>13</sup>C NMR of *N*-benzyl-*N*-3-(4-nitrophenyl)prop-2-en-1-tryptamine (1r)**

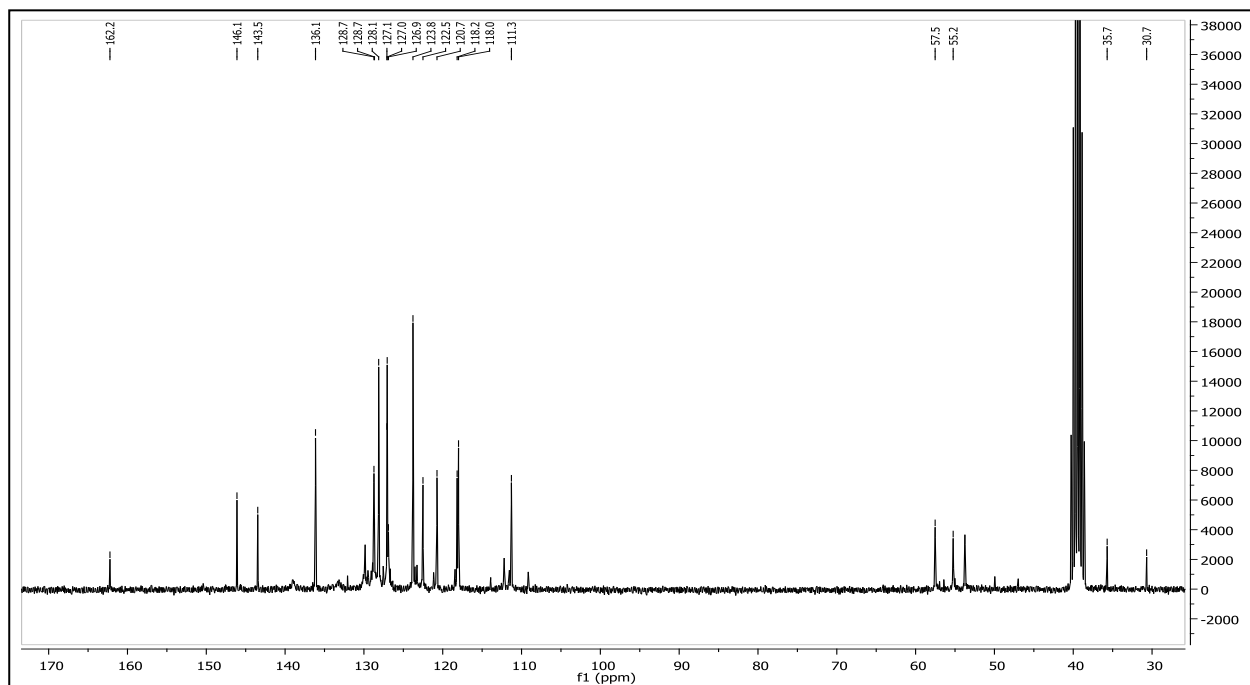

***N*-Benzyl-*N*-3-(4-methoxyphenyl)prop-2-en-1-tryptamine (1s)**

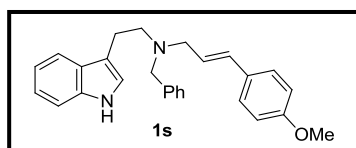

**RP-HPLC of *N*-benzyl-*N*-3-(4-methoxyphenyl)prop-2-en-1-tryptamine (1s)**

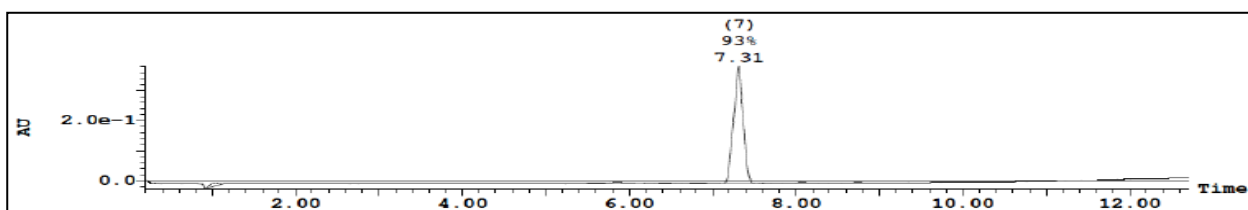

**IR of *N*-benzyl-*N*-3-(4-methoxyphenyl)prop-2-en-1-tryptamine (1s)**

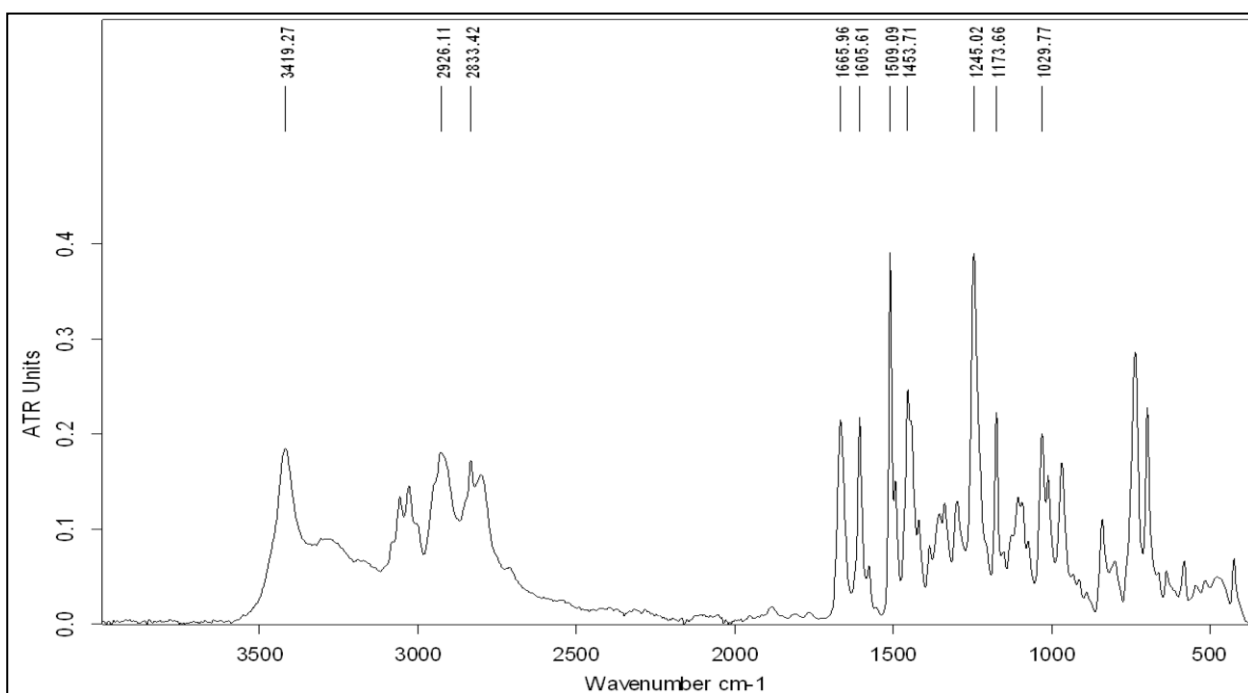

**<sup>1</sup>H NMR of *N*-benzyl-*N*-3-(4-methoxyphenyl)prop-2-en-1-tryptamine (1s)**

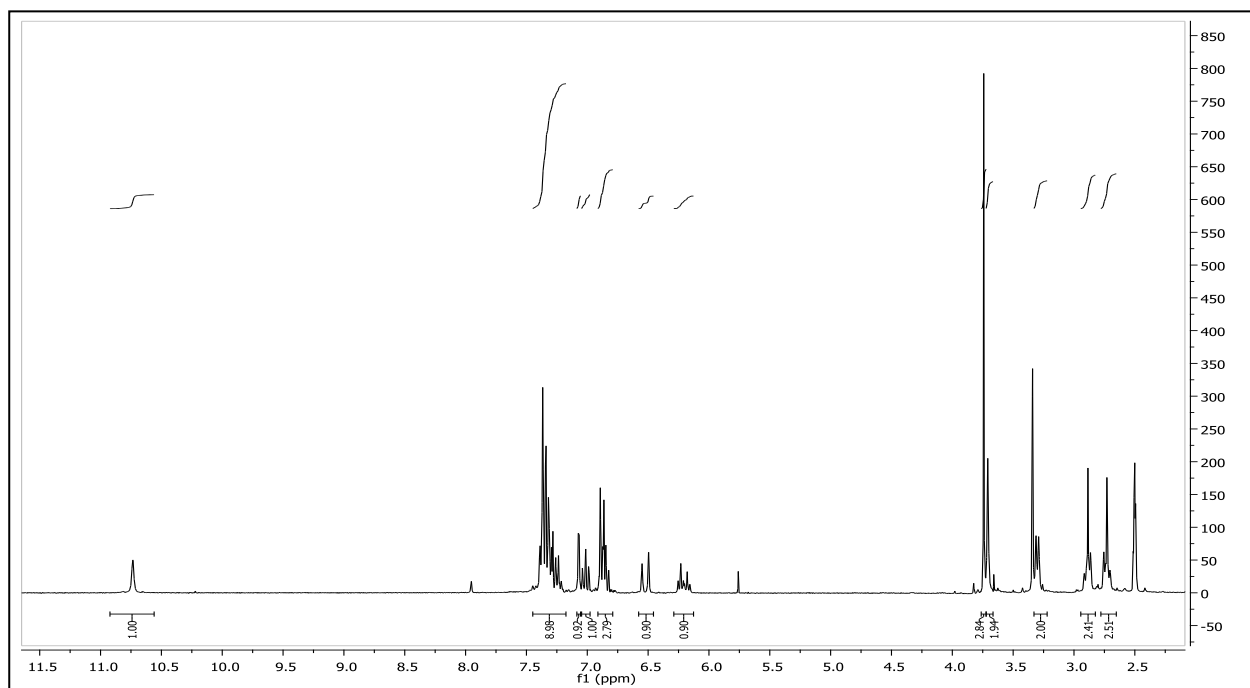

**<sup>13</sup>C NMR of *N*-benzyl-*N*-3-(4-methoxyphenyl)prop-2-en-1-tryptamine (1s)**

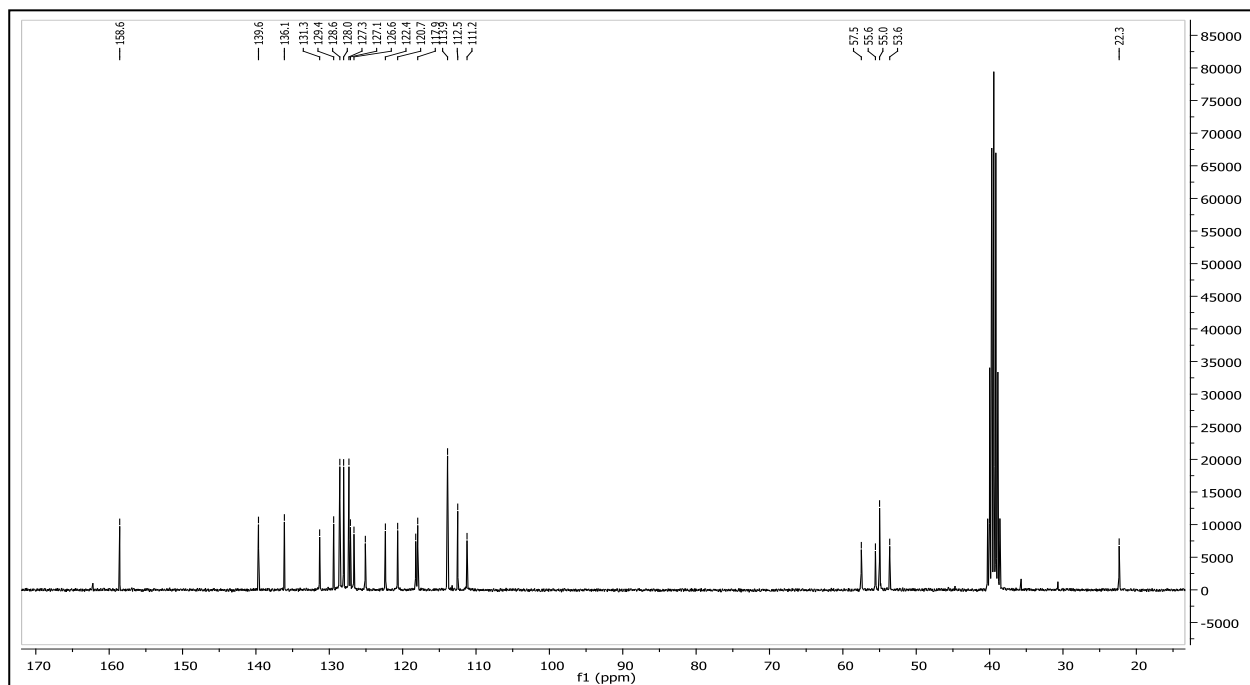

## THBC 2a

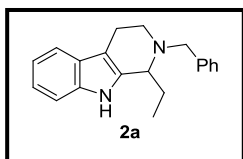

## RP-HPLC of THBC 2a

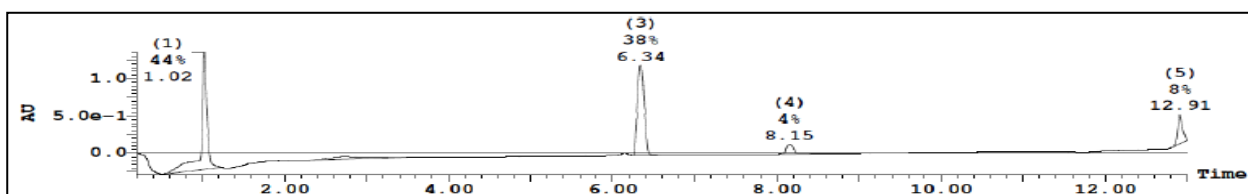

## IR of THBC 2a

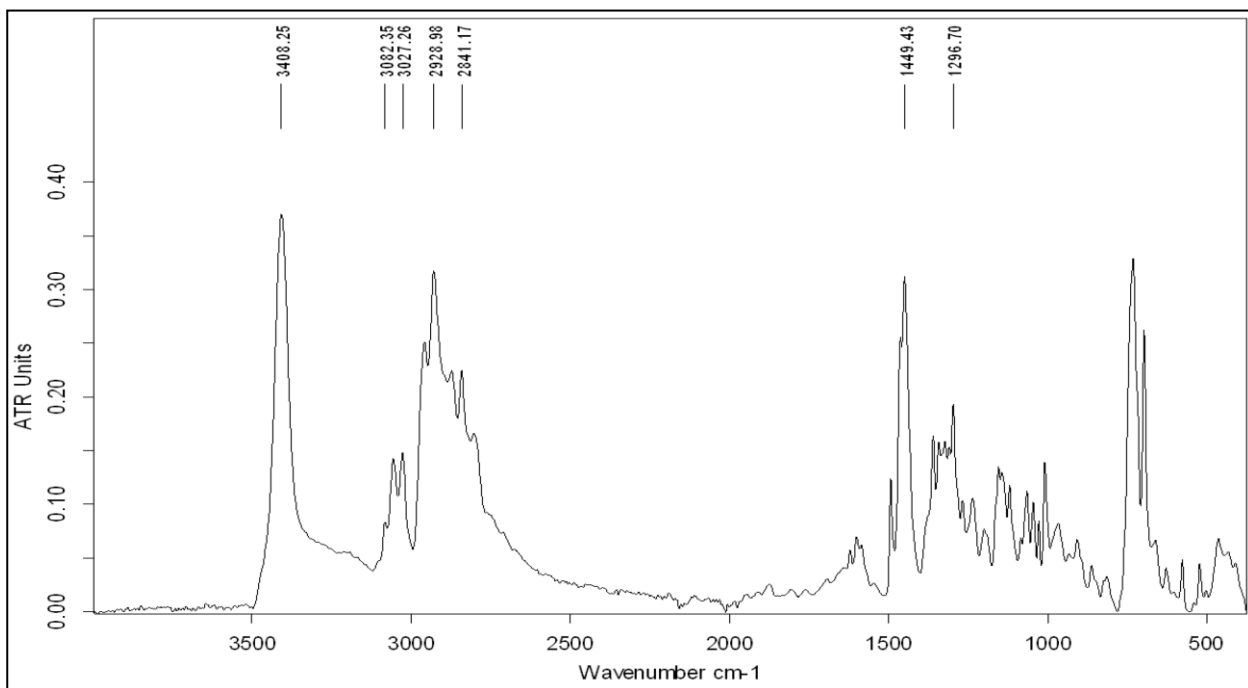



# **<sup>1</sup>H NMR of THBC 2a**

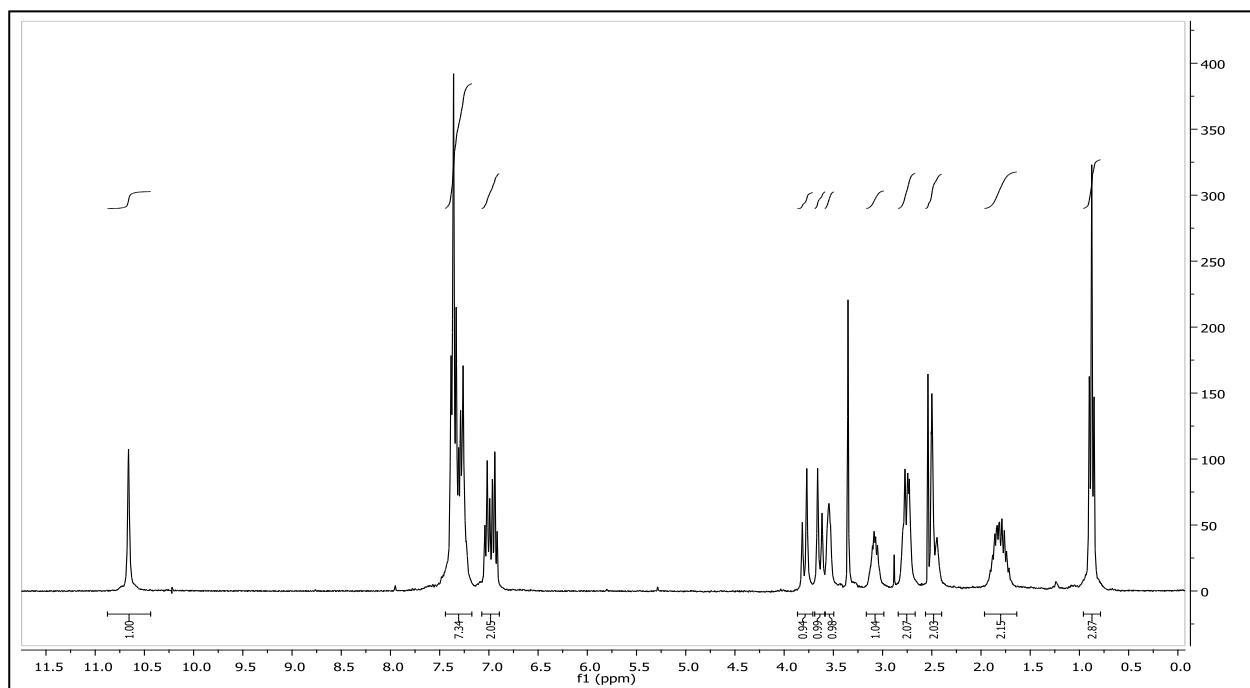

# **<sup>13</sup>C NMR of THBC 2a**

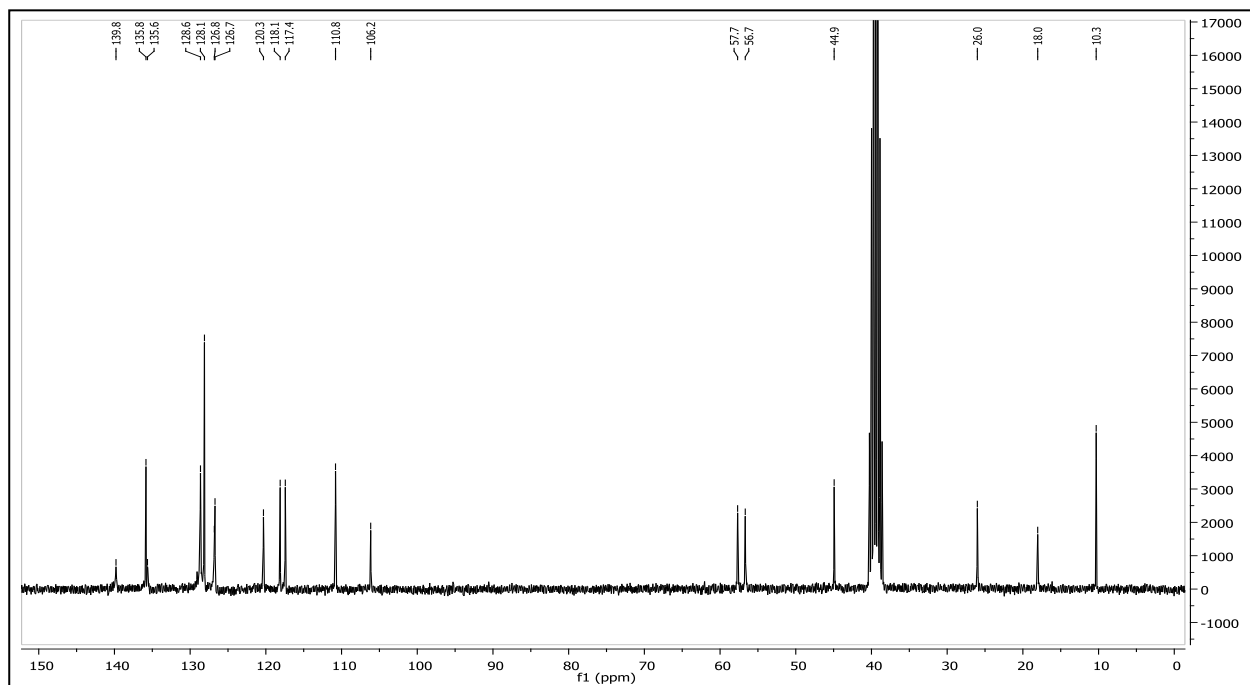

## THBC 2b

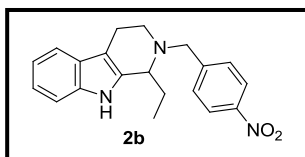

## RP-HPLC of 2b

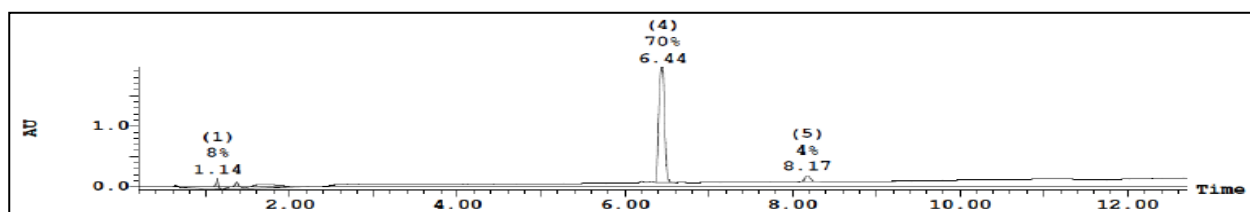

## IR of 2b

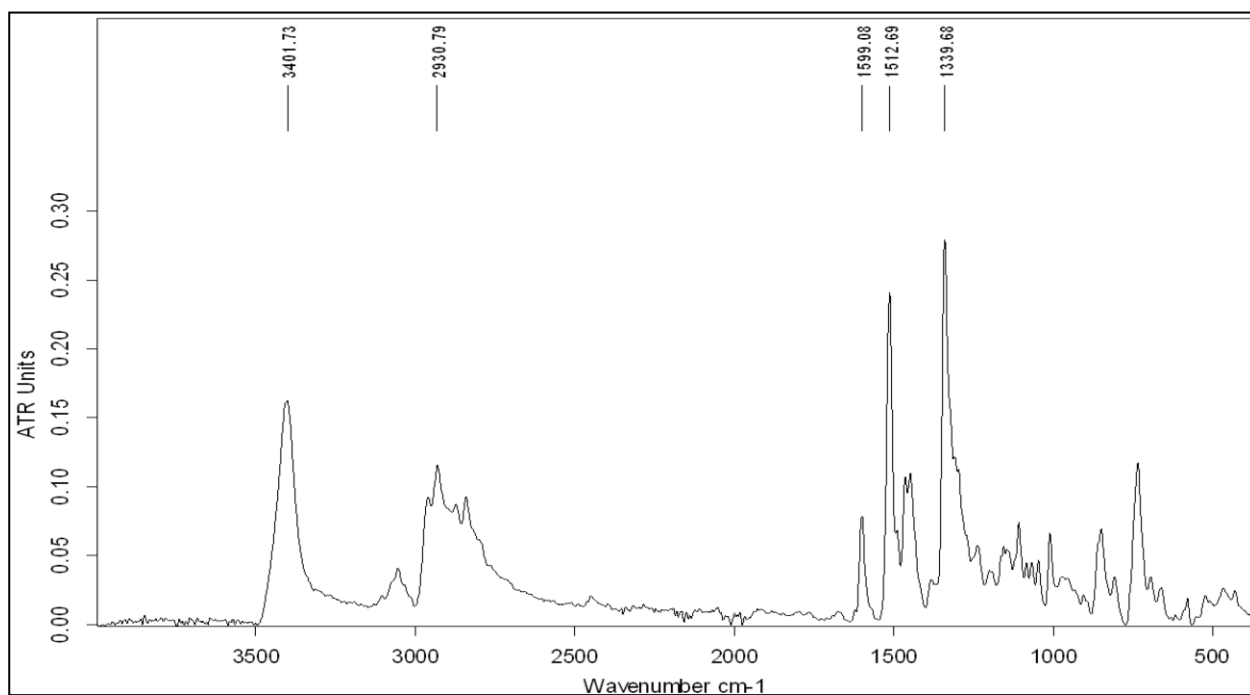

# **<sup>1</sup>H NMR of 2b**

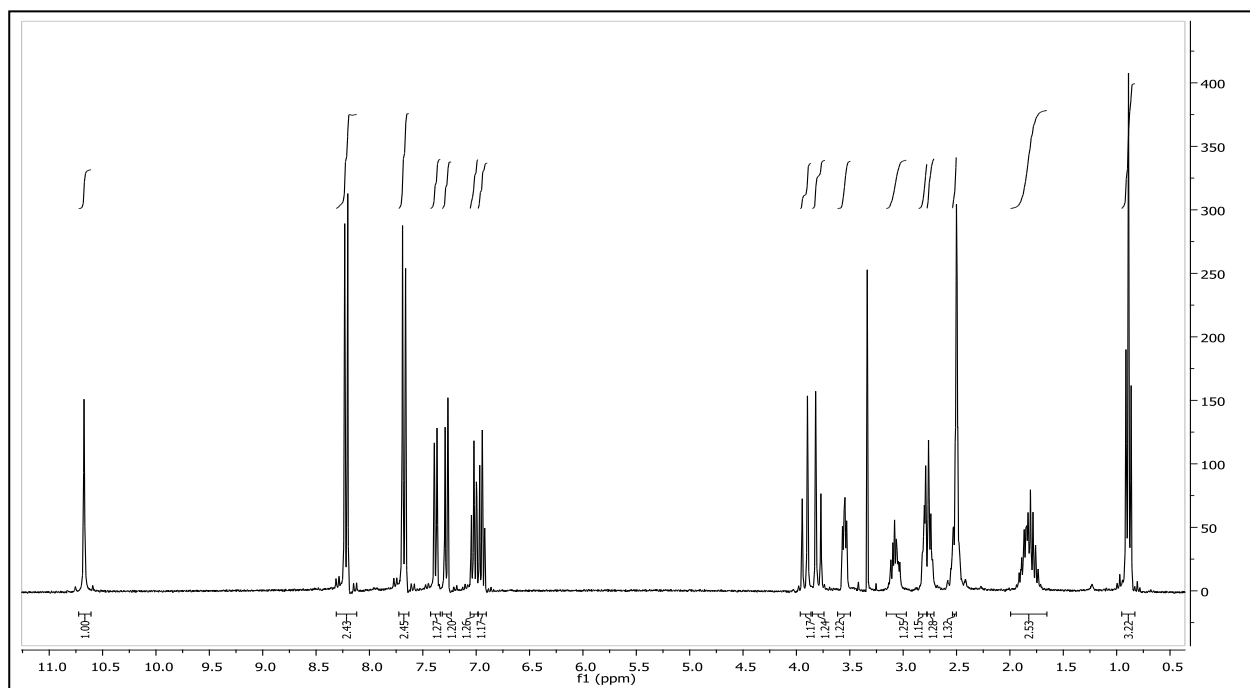

# **<sup>13</sup>C NMR of 2b**

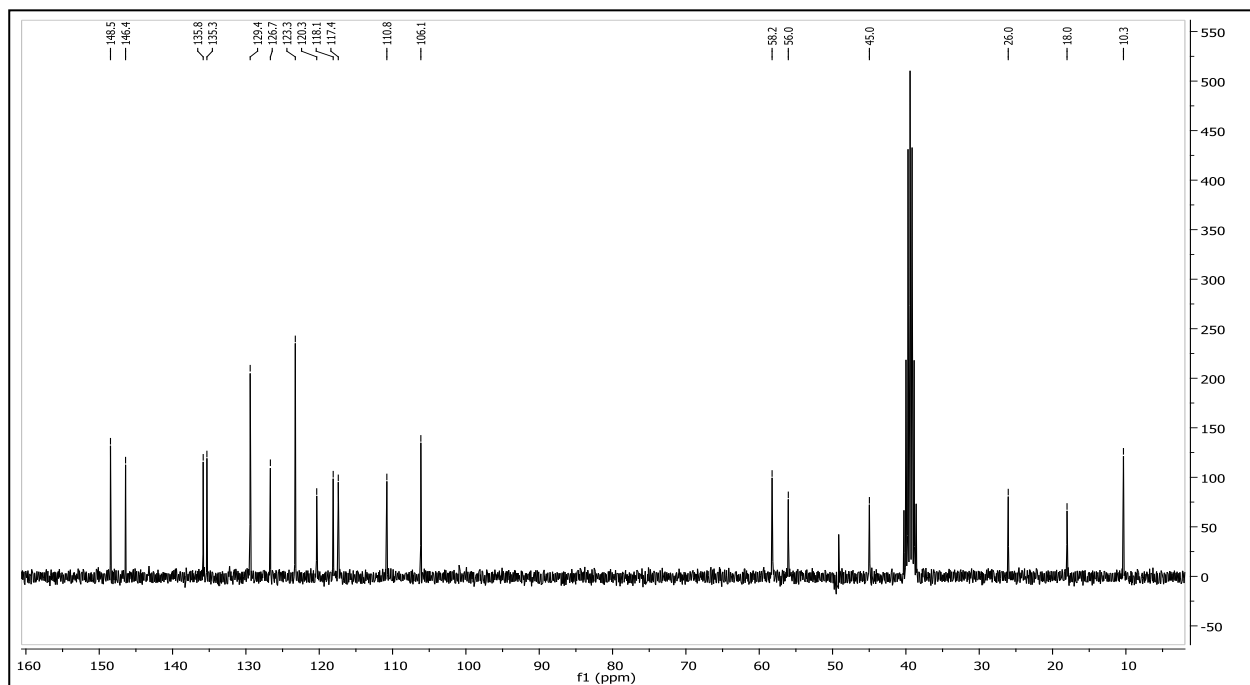

## THBC 2c

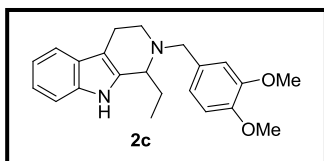

## RP-HPLC of 2c

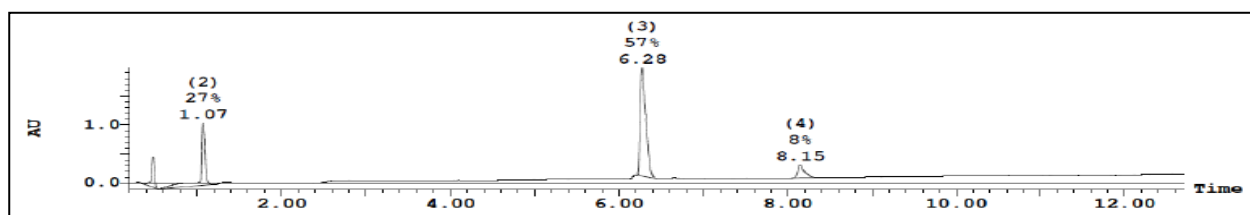

## IR of 2c

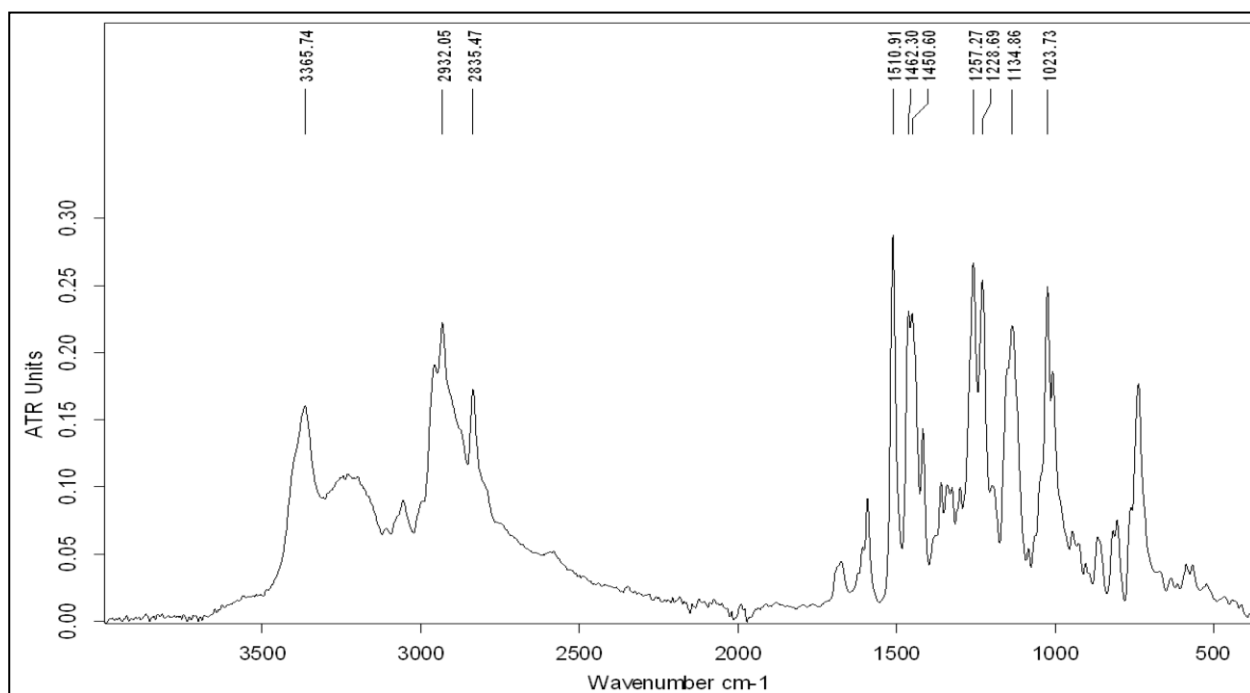

# **<sup>1</sup>H NMR of 2c**

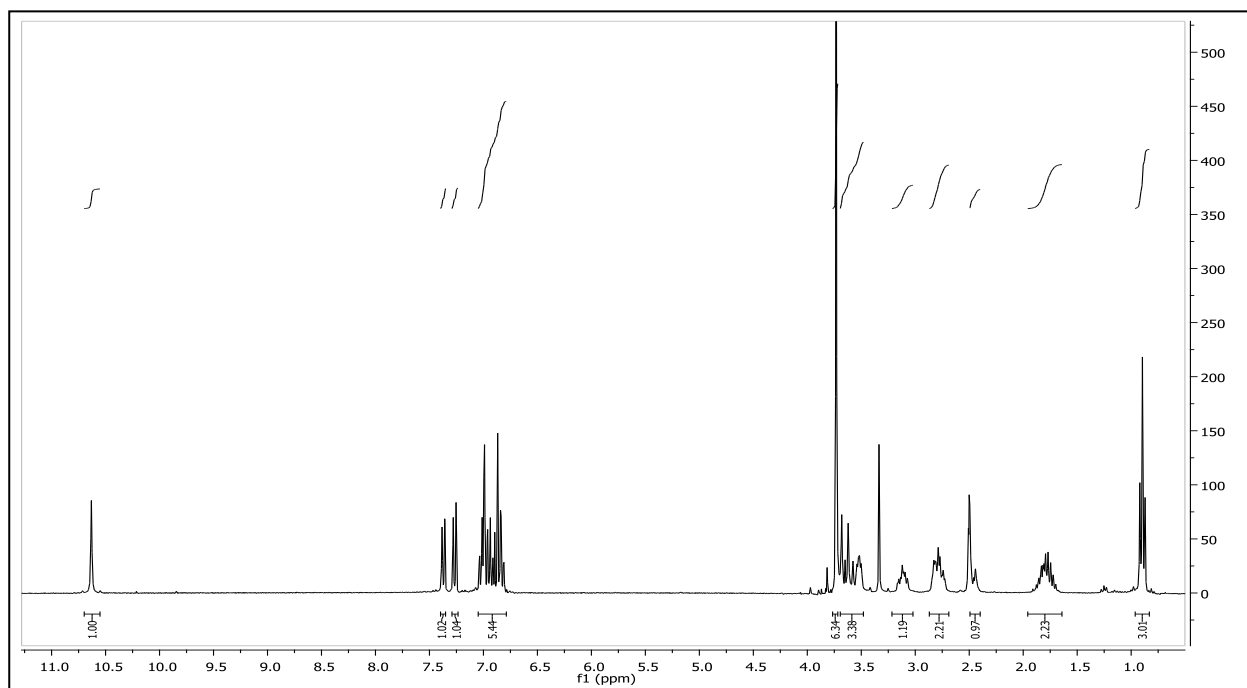

# **<sup>13</sup>C NMR of 2c**

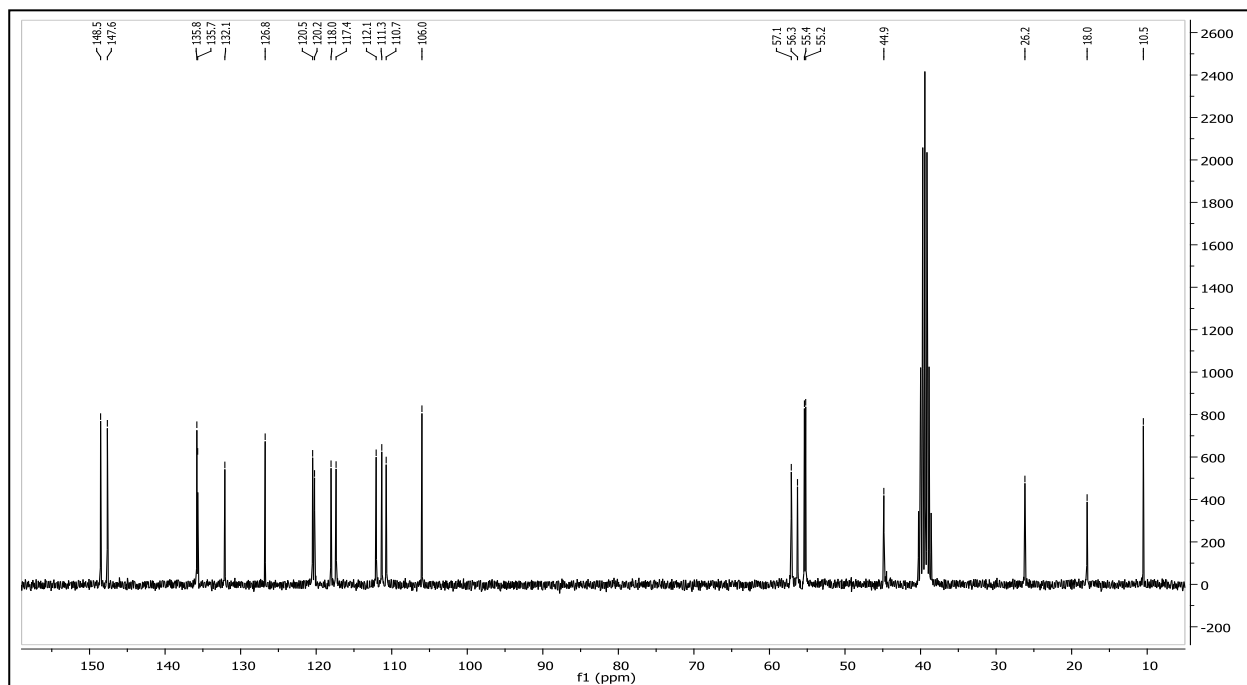

## THBC 2d

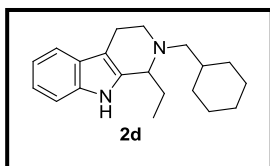

## RP-HPLC of 2d

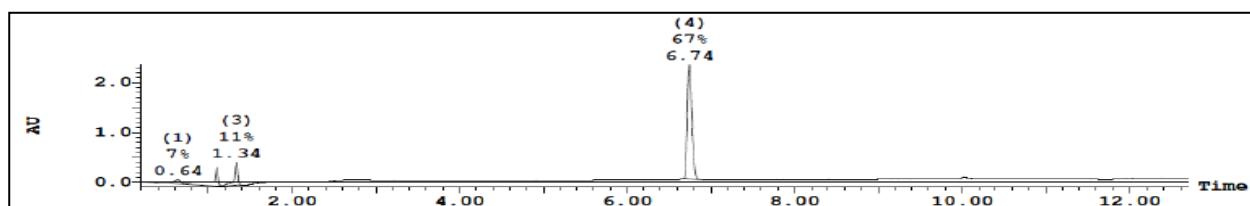

## IR of 2d

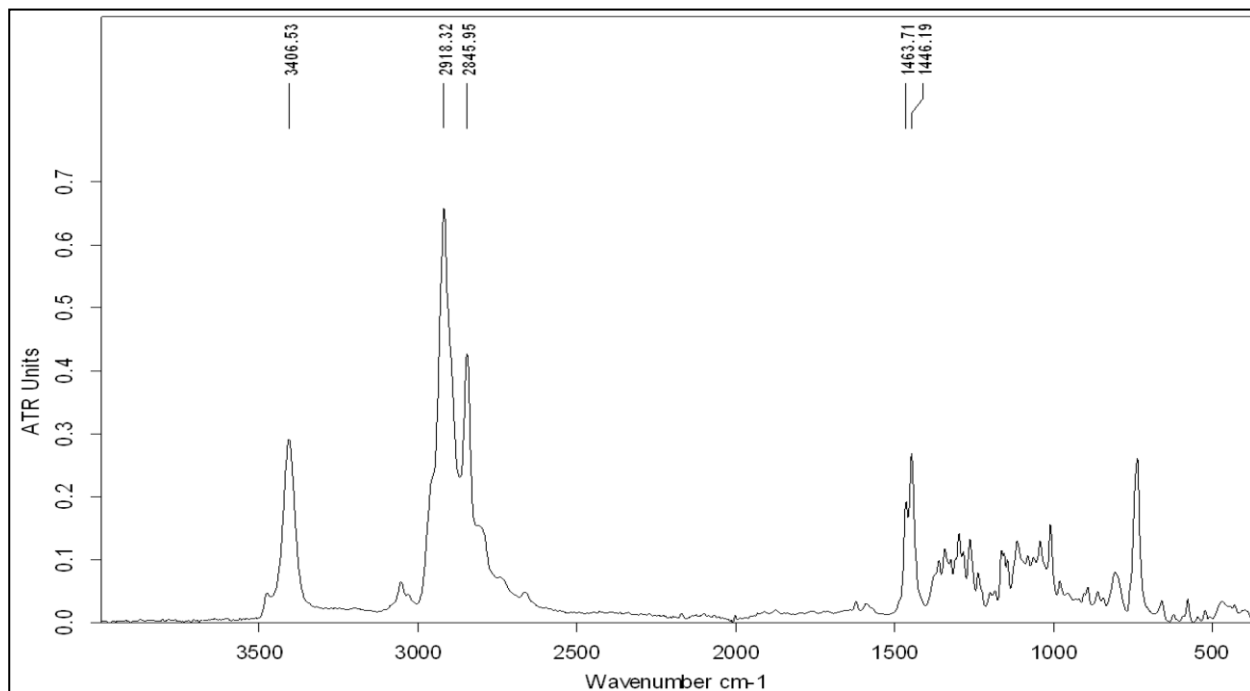

# **<sup>1</sup>H NMR of 2d**

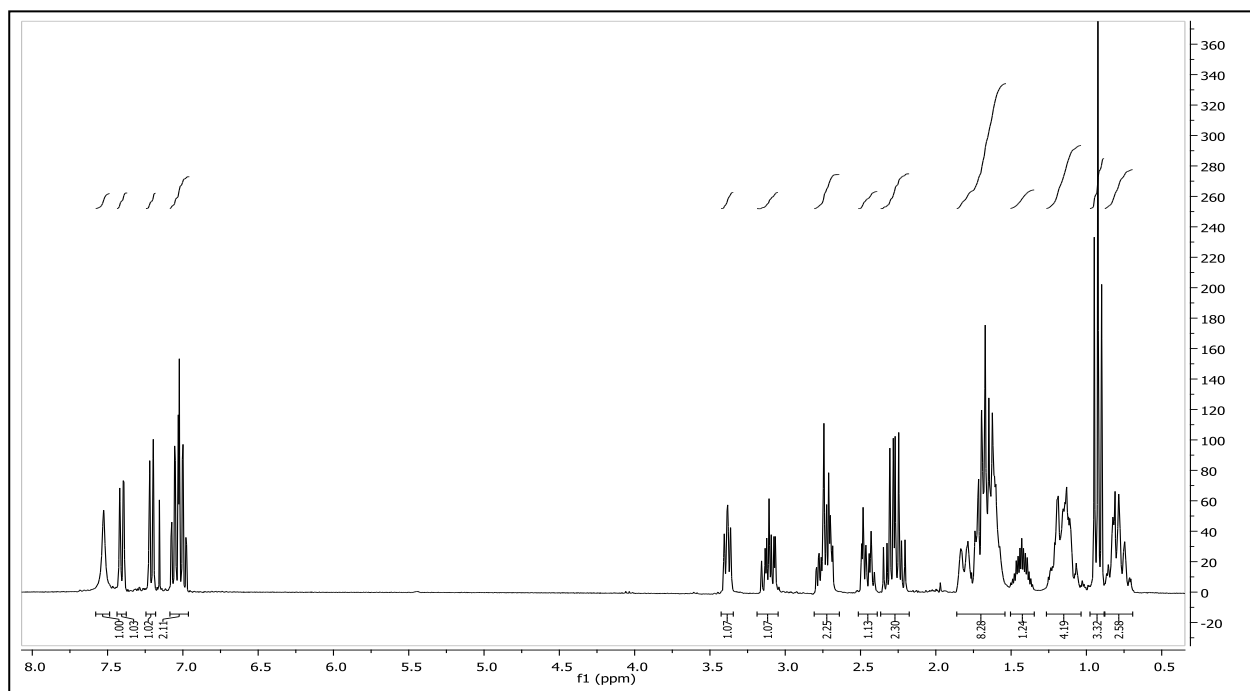

# **<sup>13</sup>C NMR of 2d**

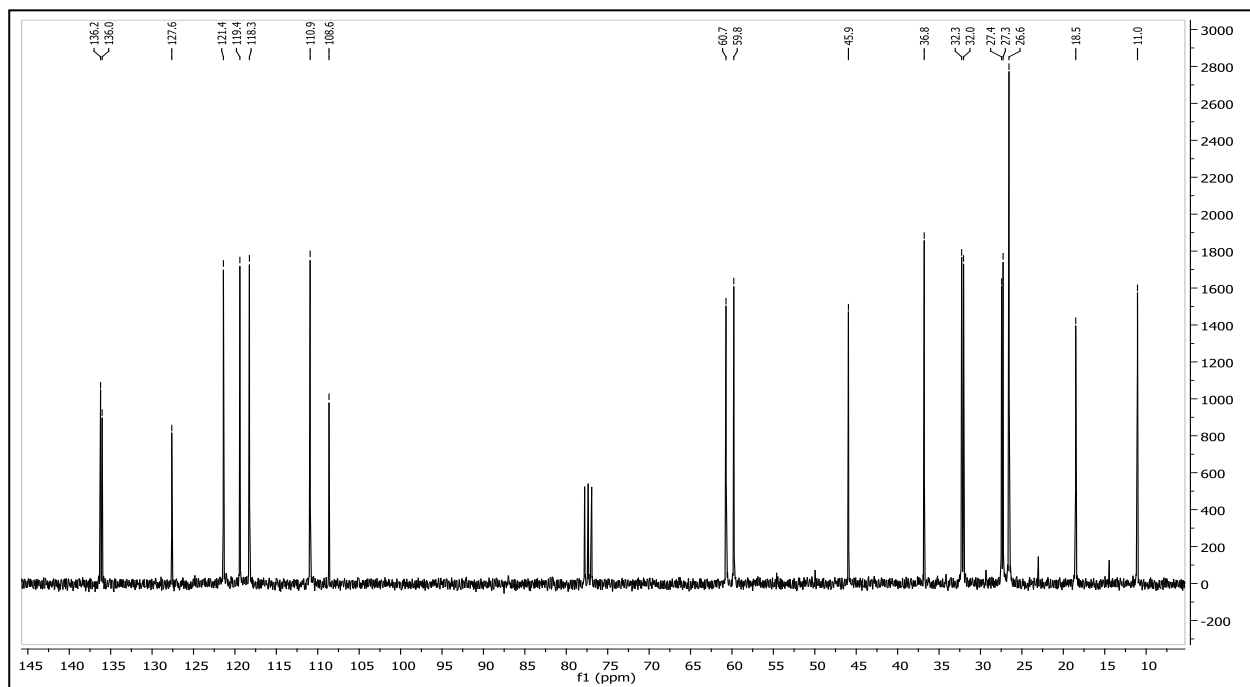

## THBC 2e

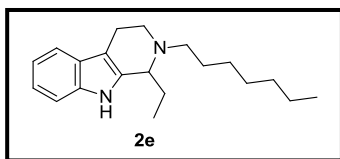

## RP-HPLC of 2e

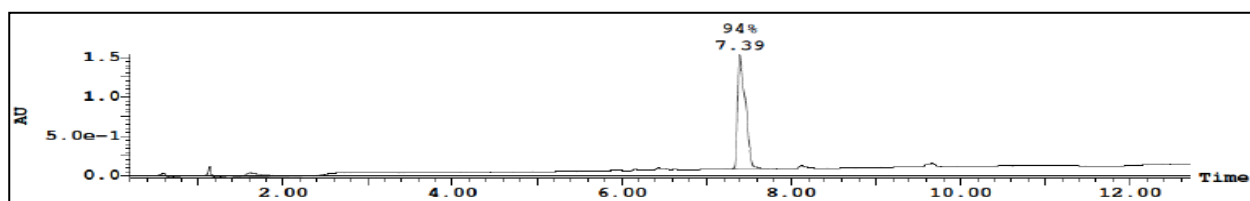

## IR of 2e

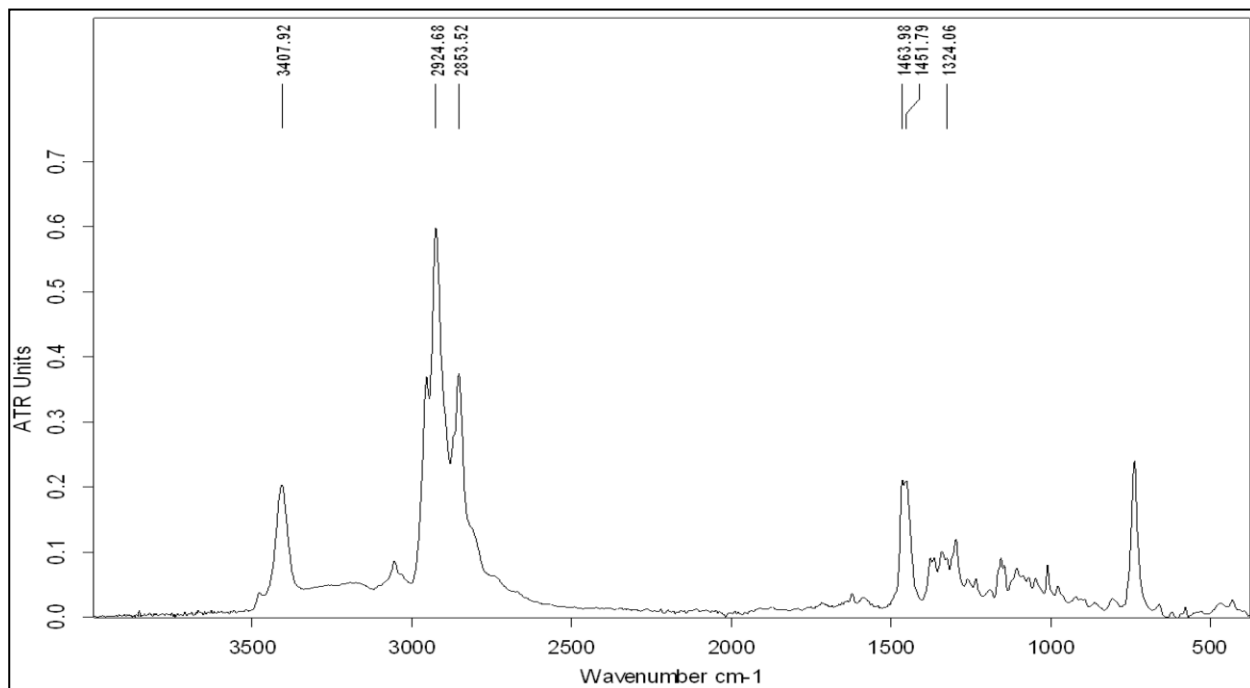



# **<sup>1</sup>H NMR of 2e**

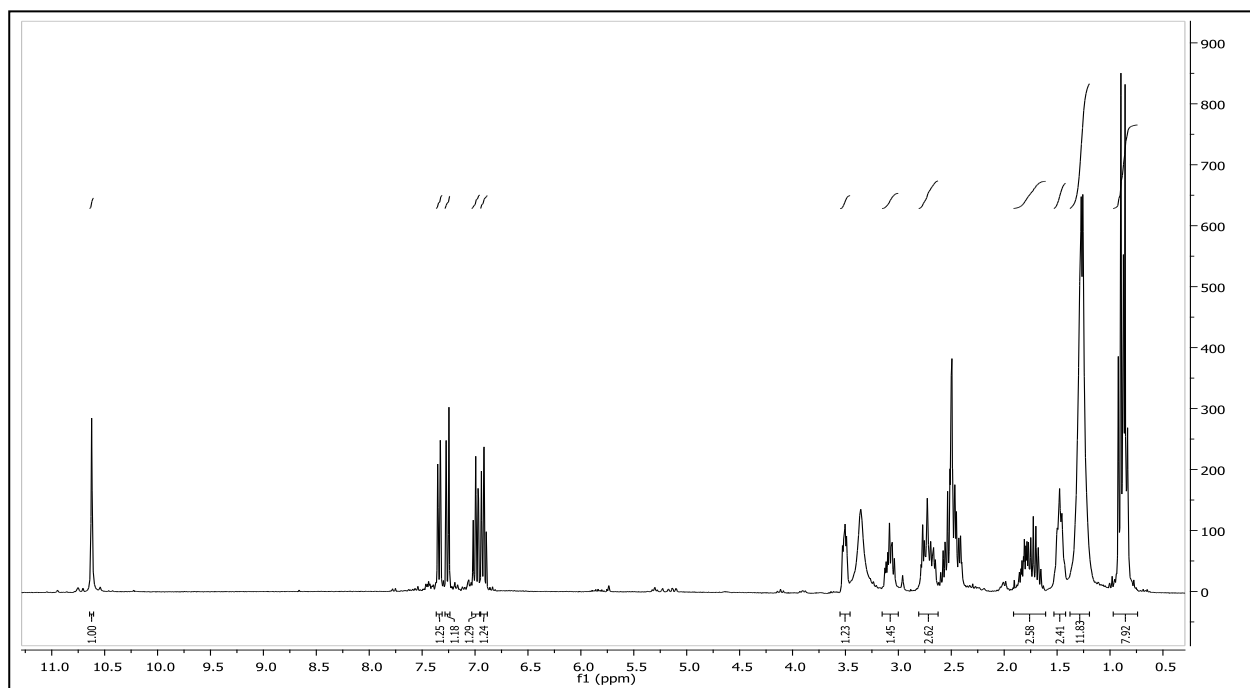

# **<sup>13</sup>C NMR of 2e**

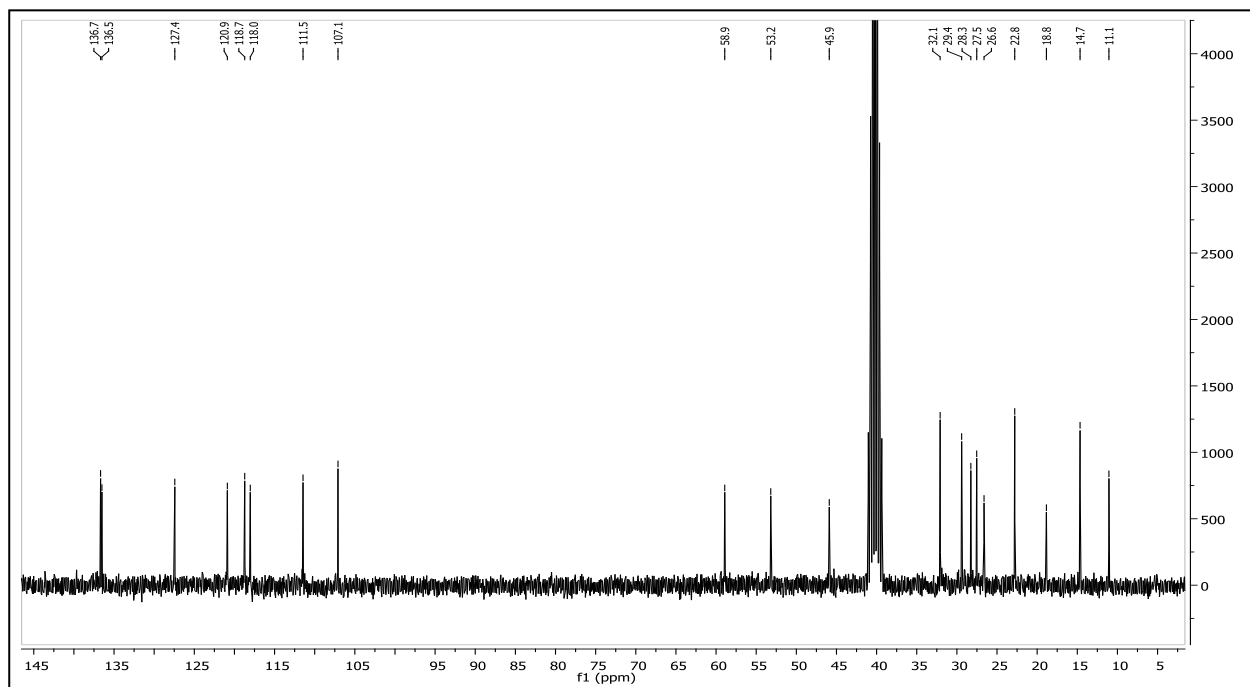

## THBC 2f

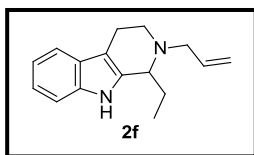

## RP-HPLC of 2f

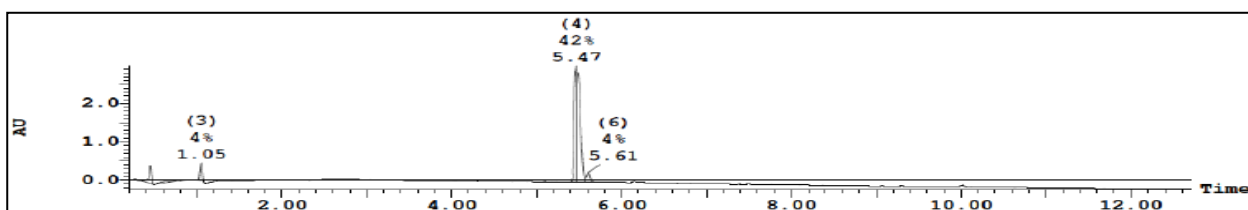

## IR of 2f

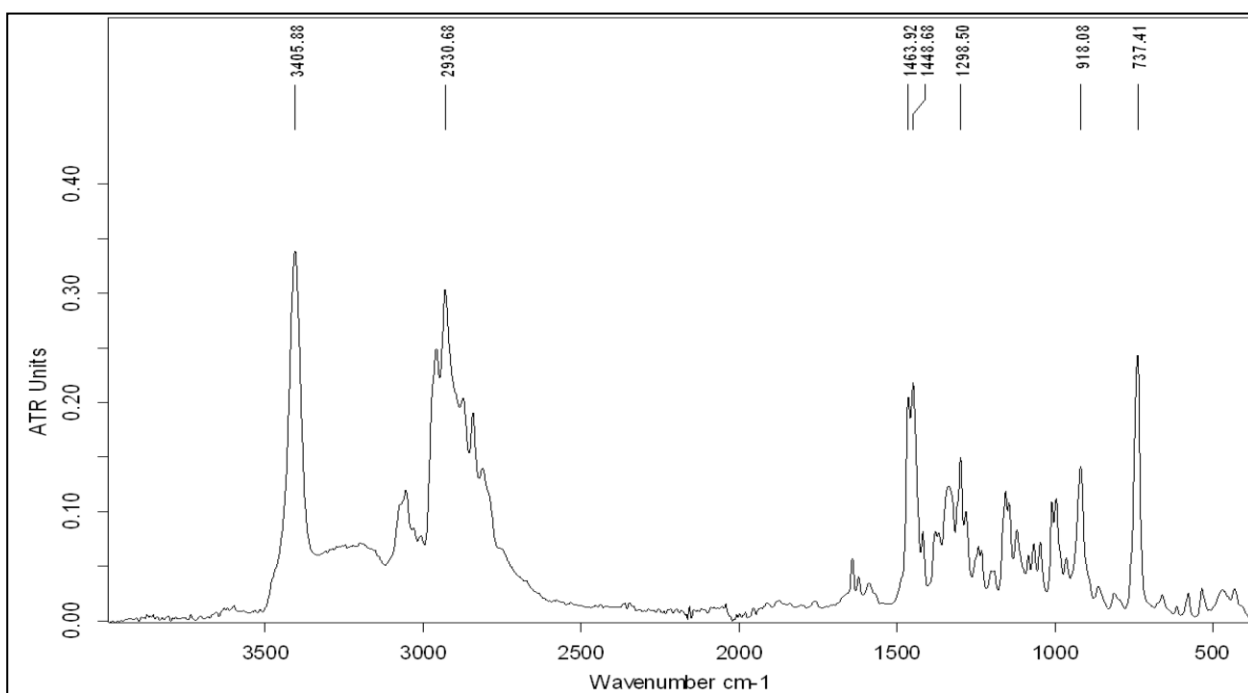

# **<sup>1</sup>H NMR of 2f**

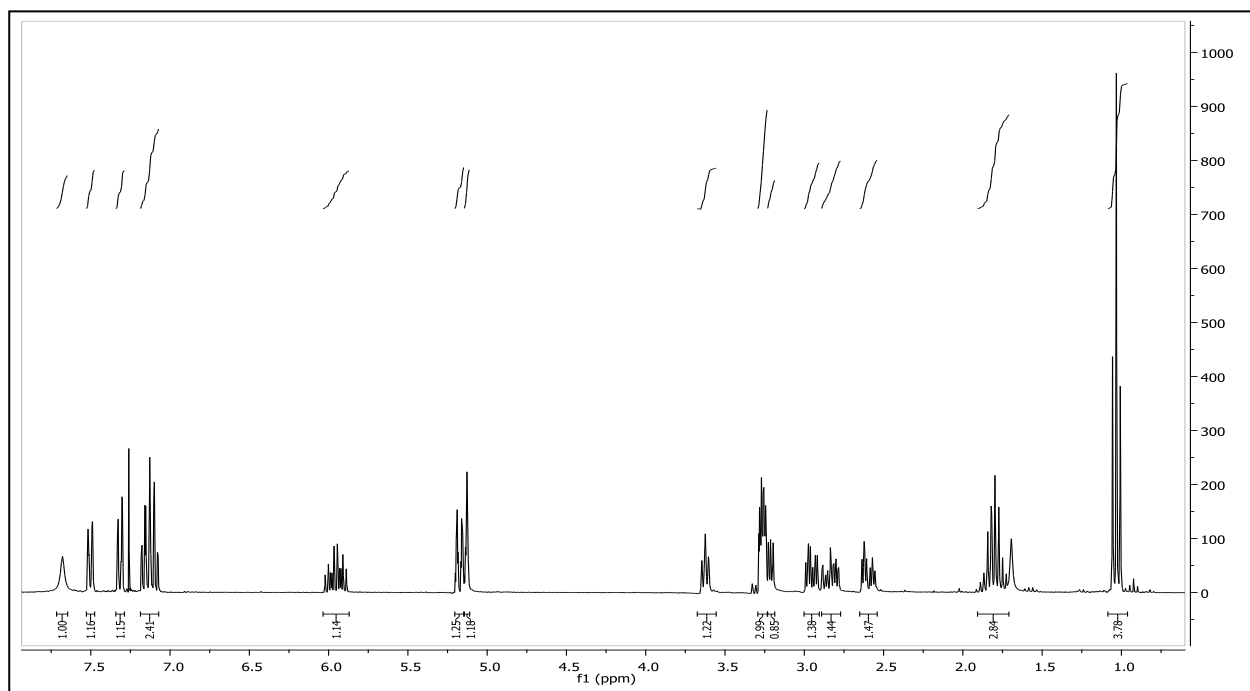

# **<sup>13</sup>C NMR of 2f**

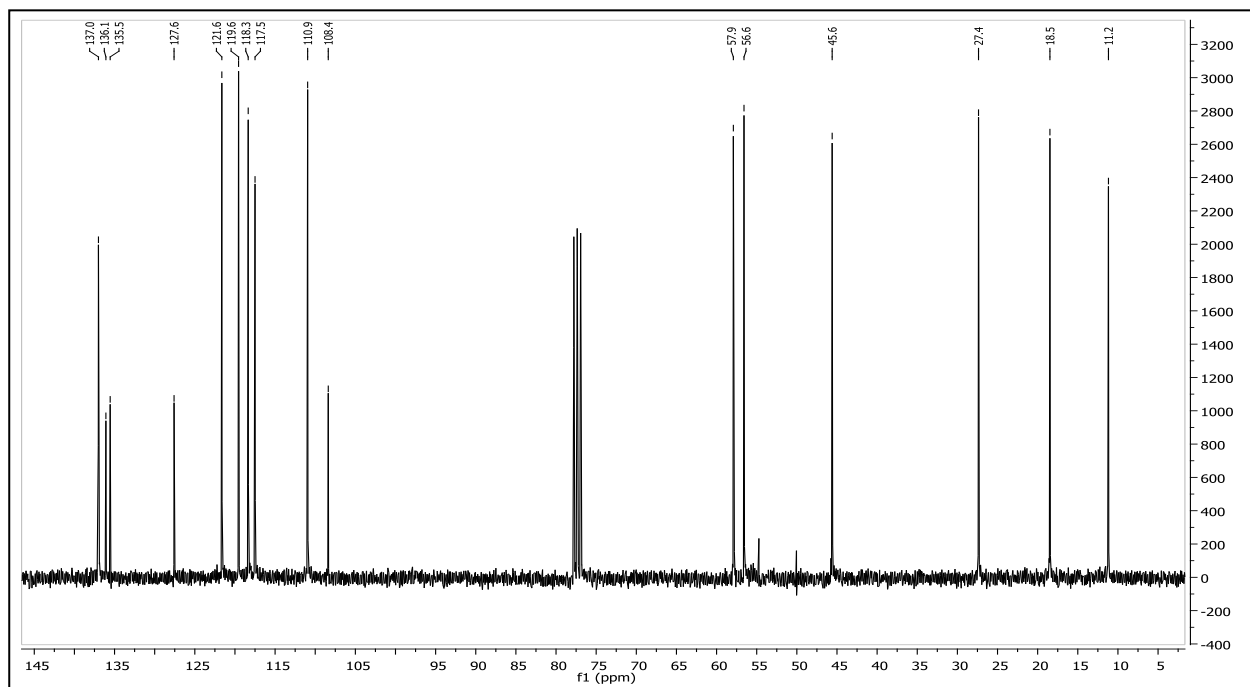

## THBC 2g

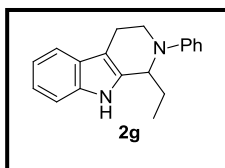

## RP-HPLC of 2g

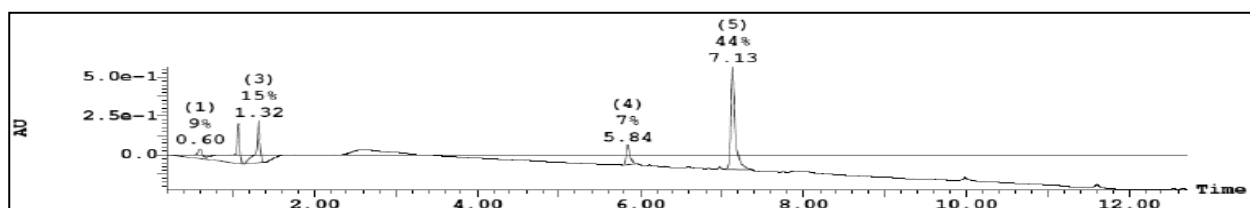

## IR of 2g

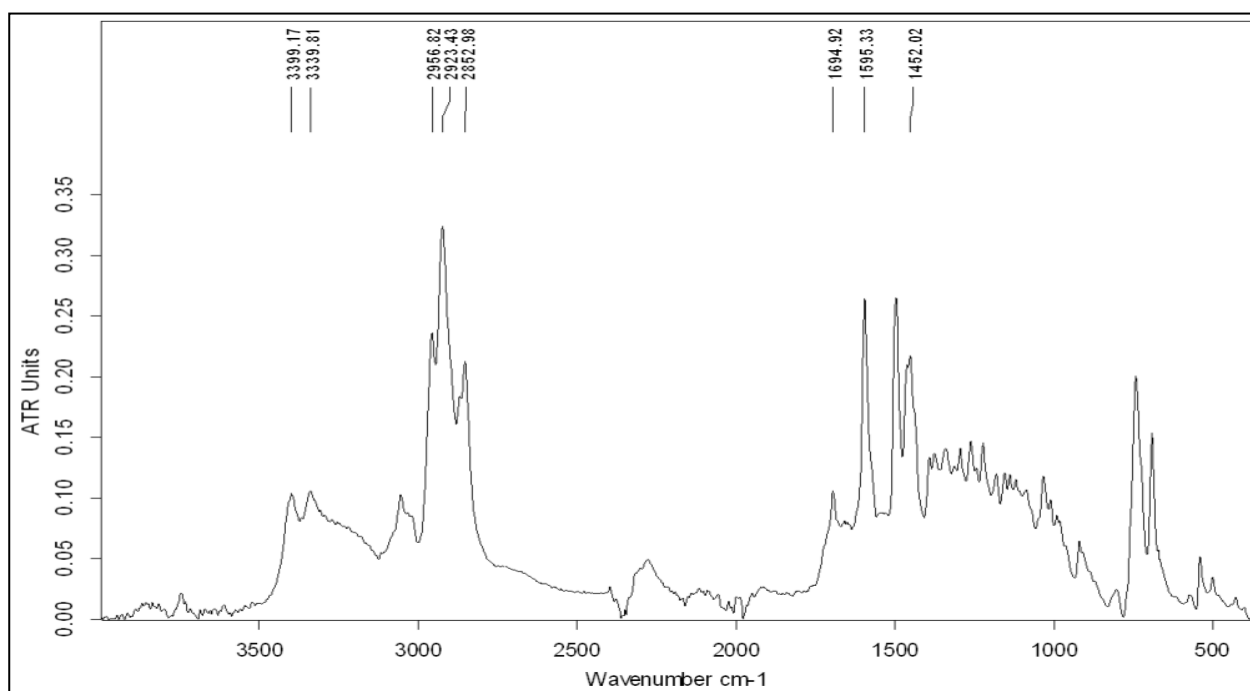

# **<sup>1</sup>H NMR of 2g**

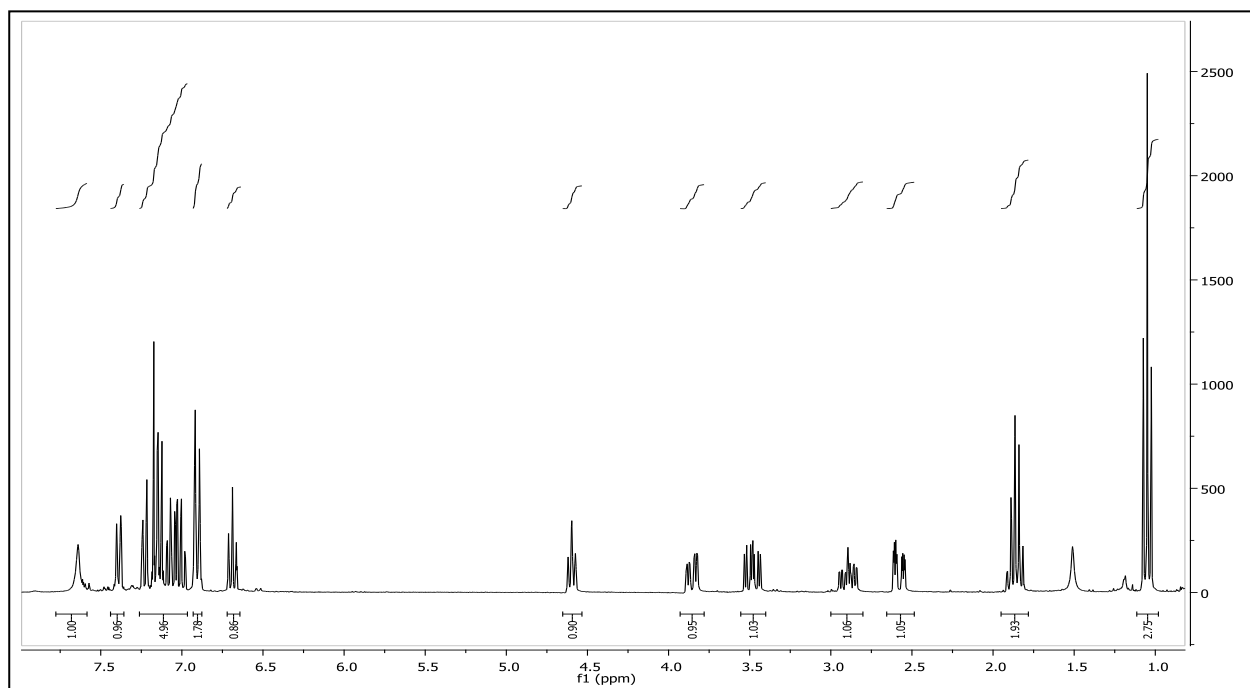

# **<sup>13</sup>C NMR of 2g**

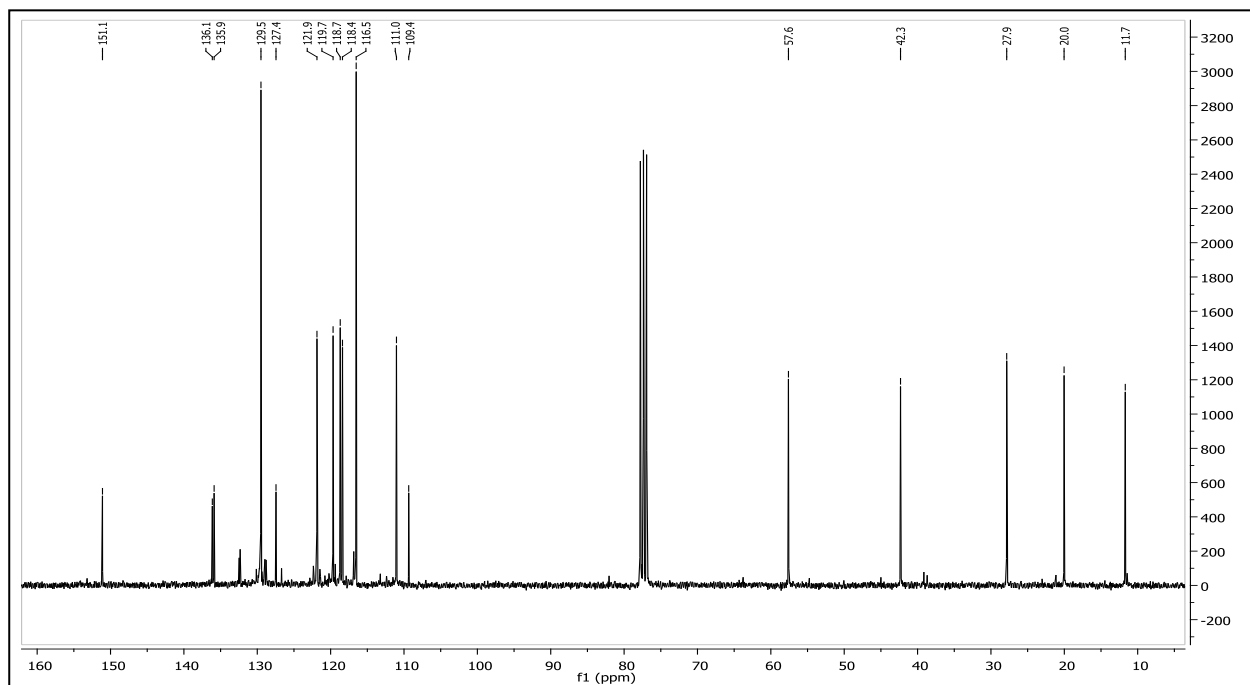

## THBC 2h

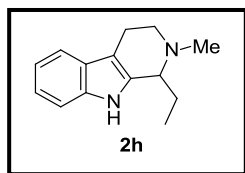

## RP-HPLC of 2h

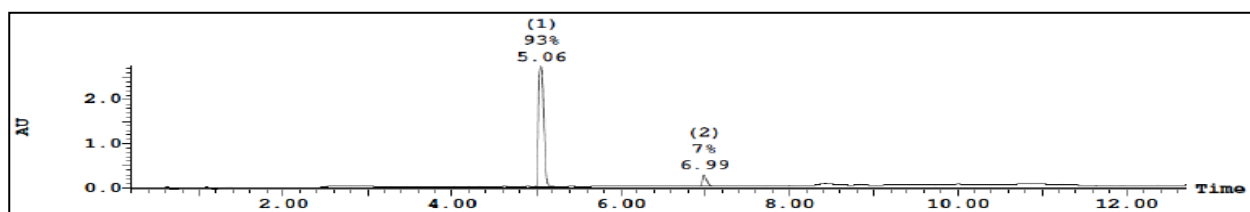

## IR of 2h

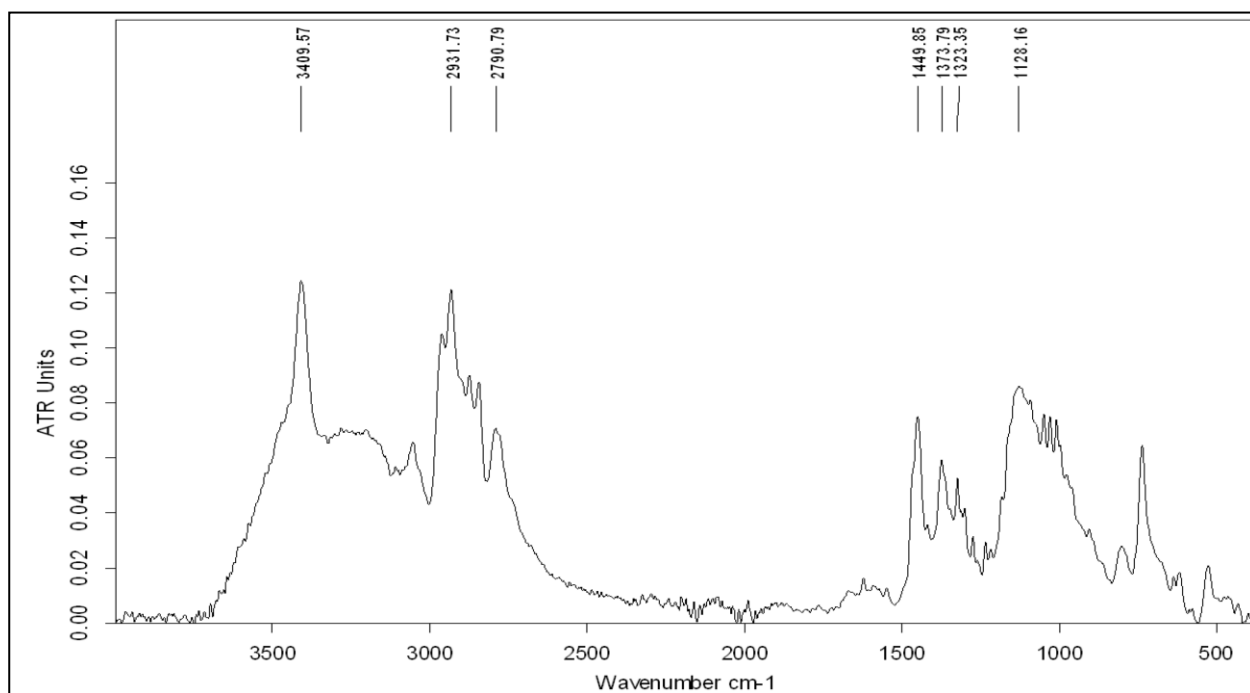

# **<sup>1</sup>H NMR of 2h**

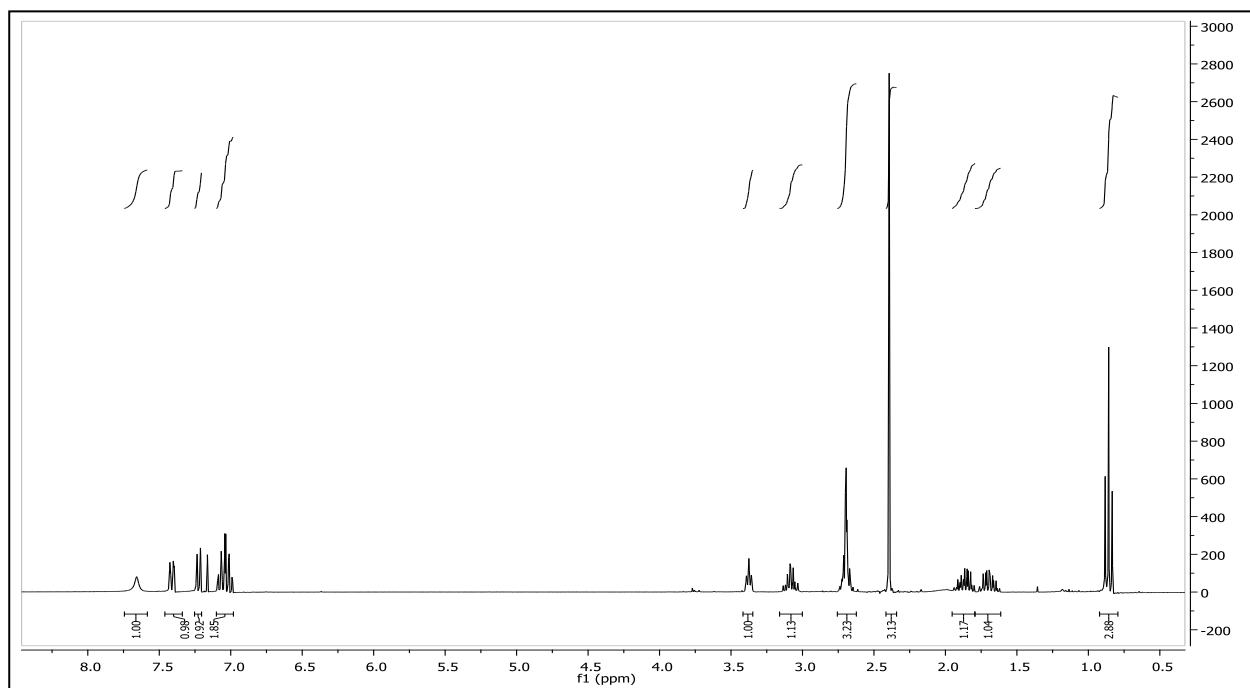

# **<sup>13</sup>C NMR of 2h**

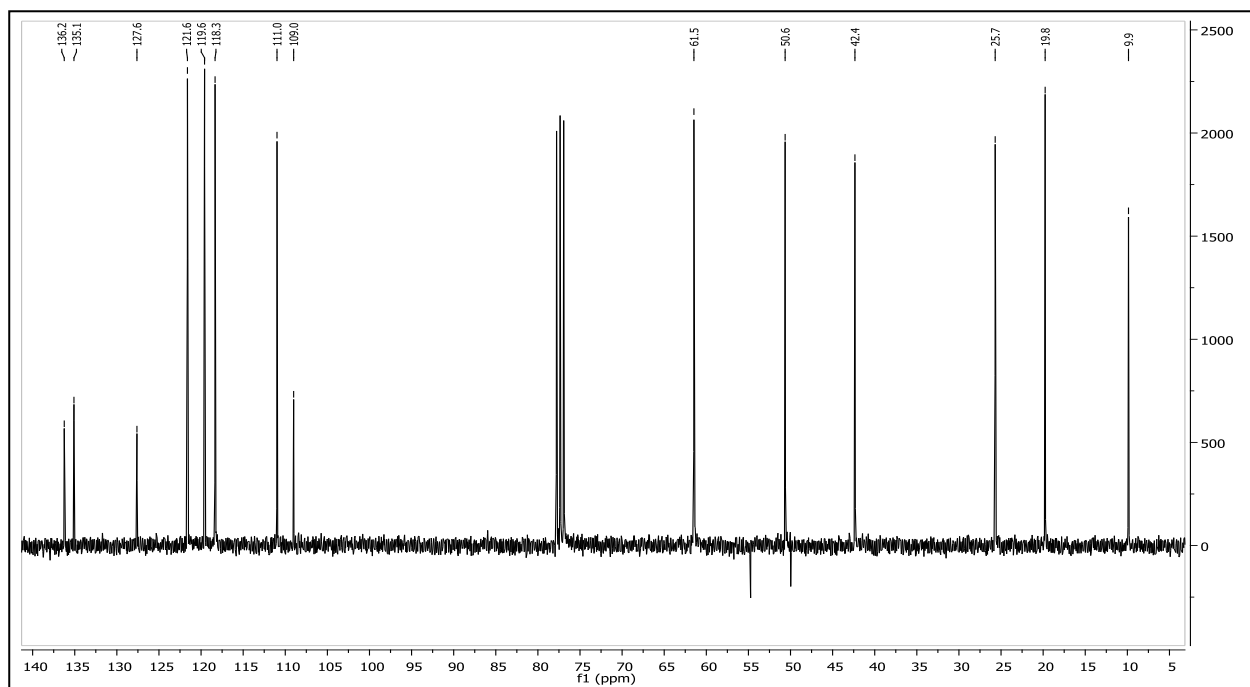

## THBC 2i

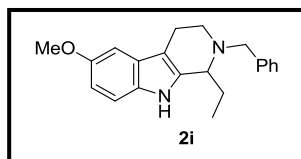

## RP-HPLC of 2i

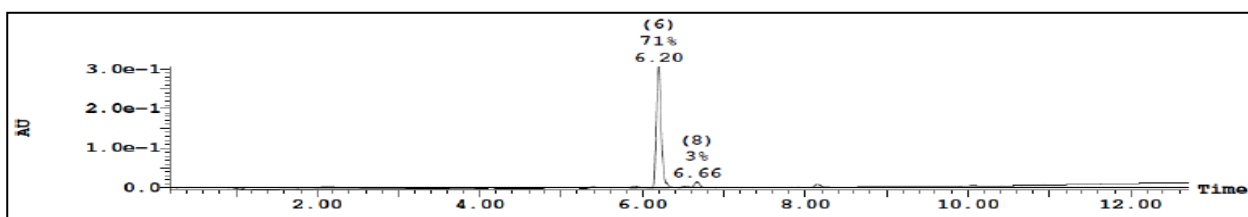

## IR of 2i

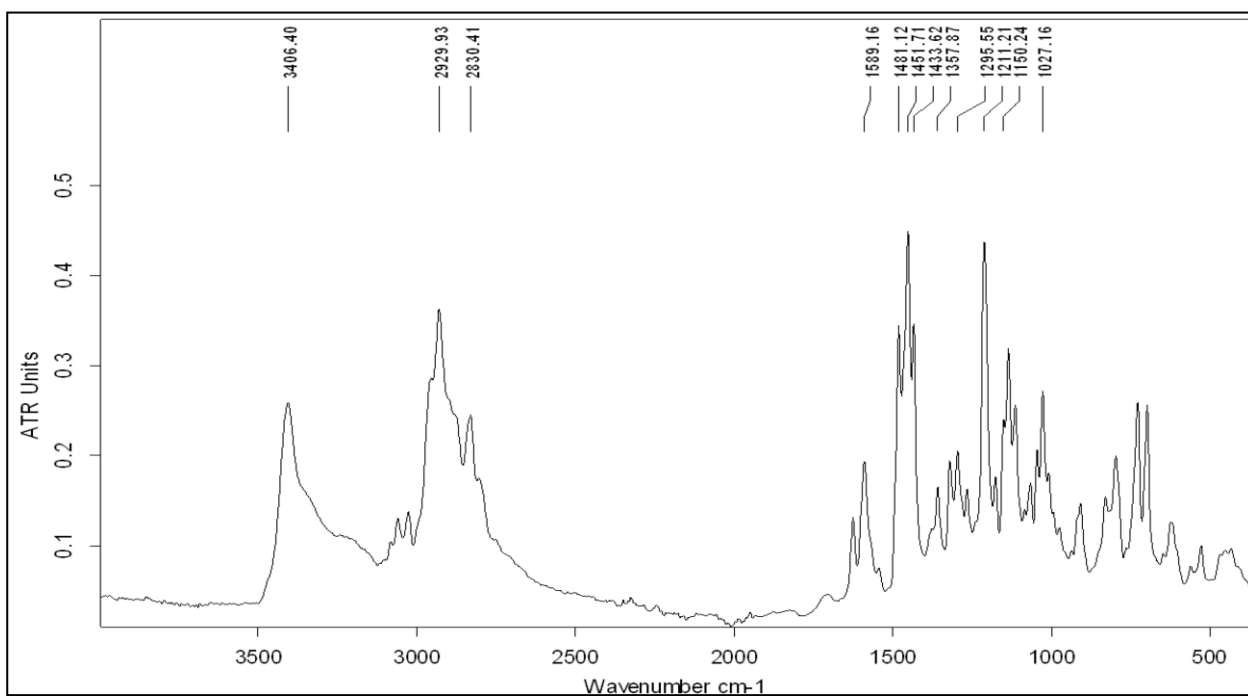



# **<sup>1</sup>H NMR of 2i**

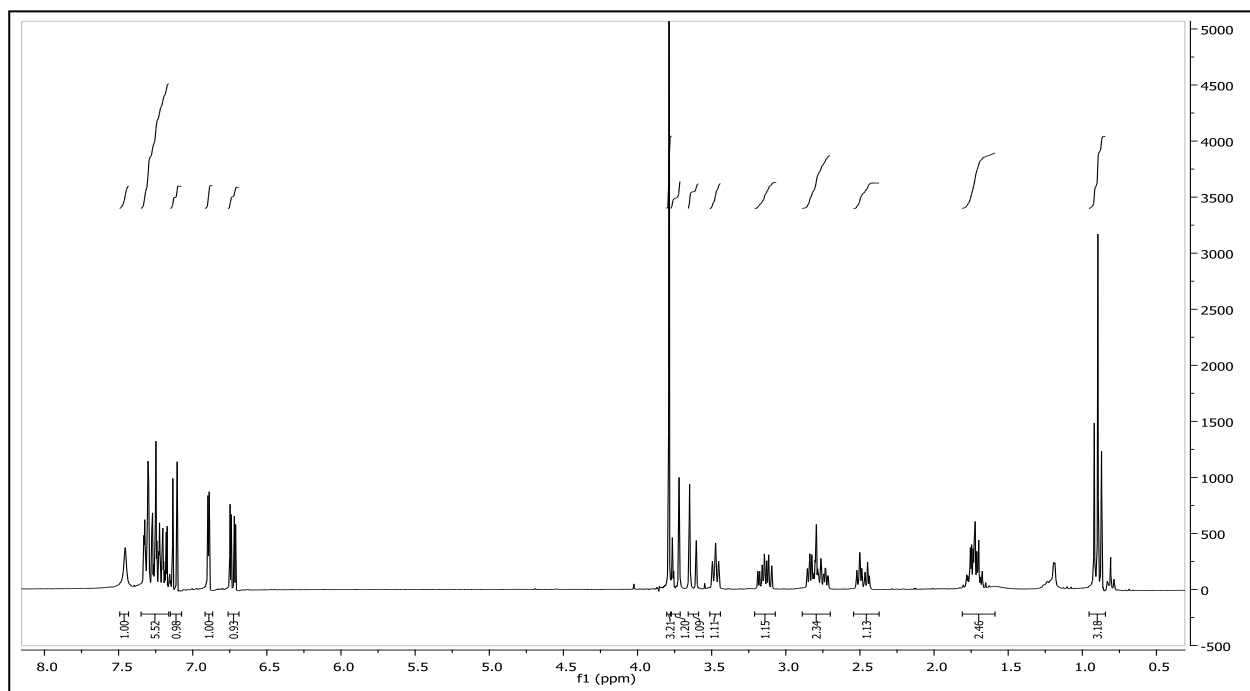

# **<sup>13</sup>C NMR of 2i**

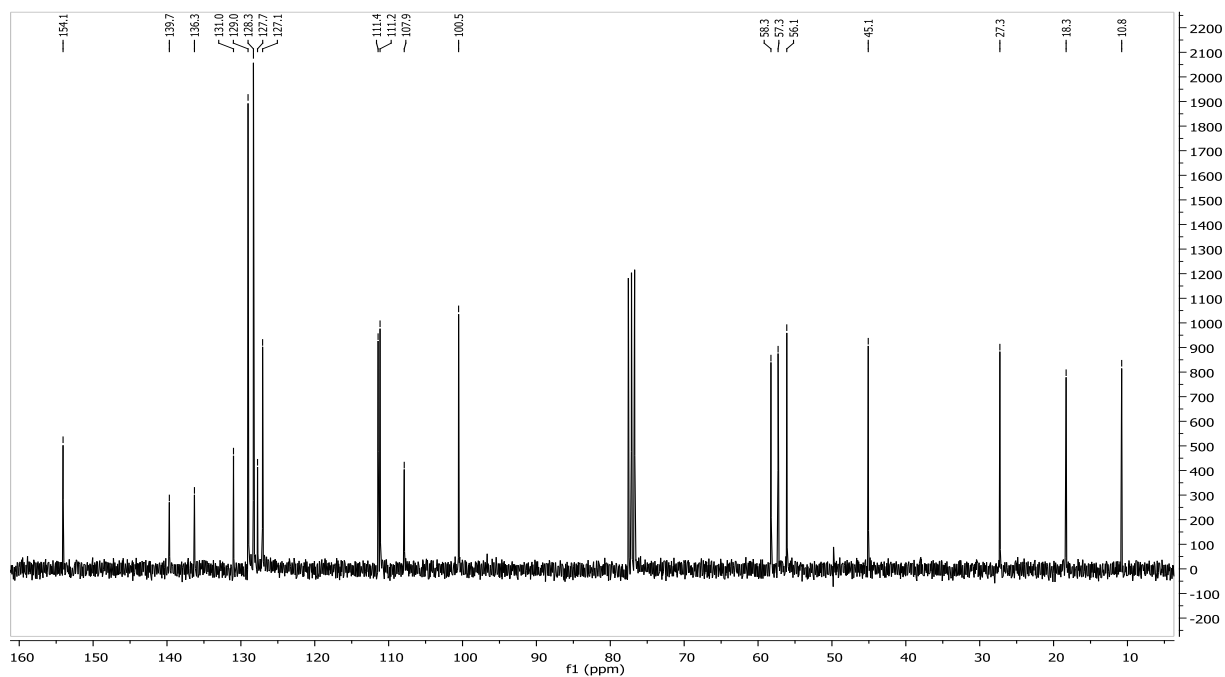

## THBC 2j

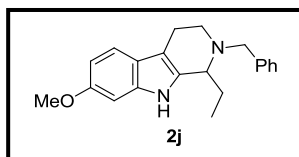

## RP-HPLC of 2j

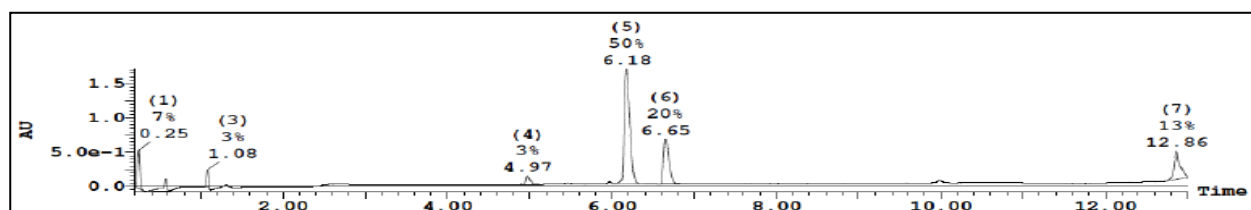

## IR of 2j

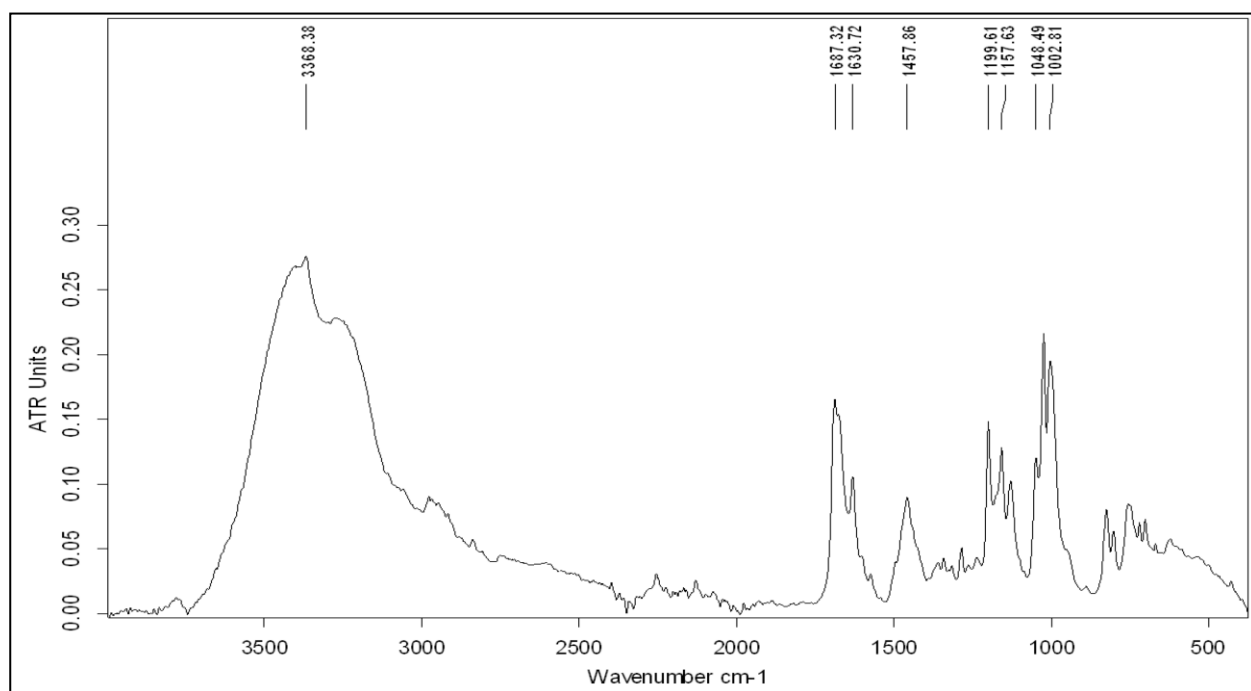

# <sup>1</sup>H NMR of 2j

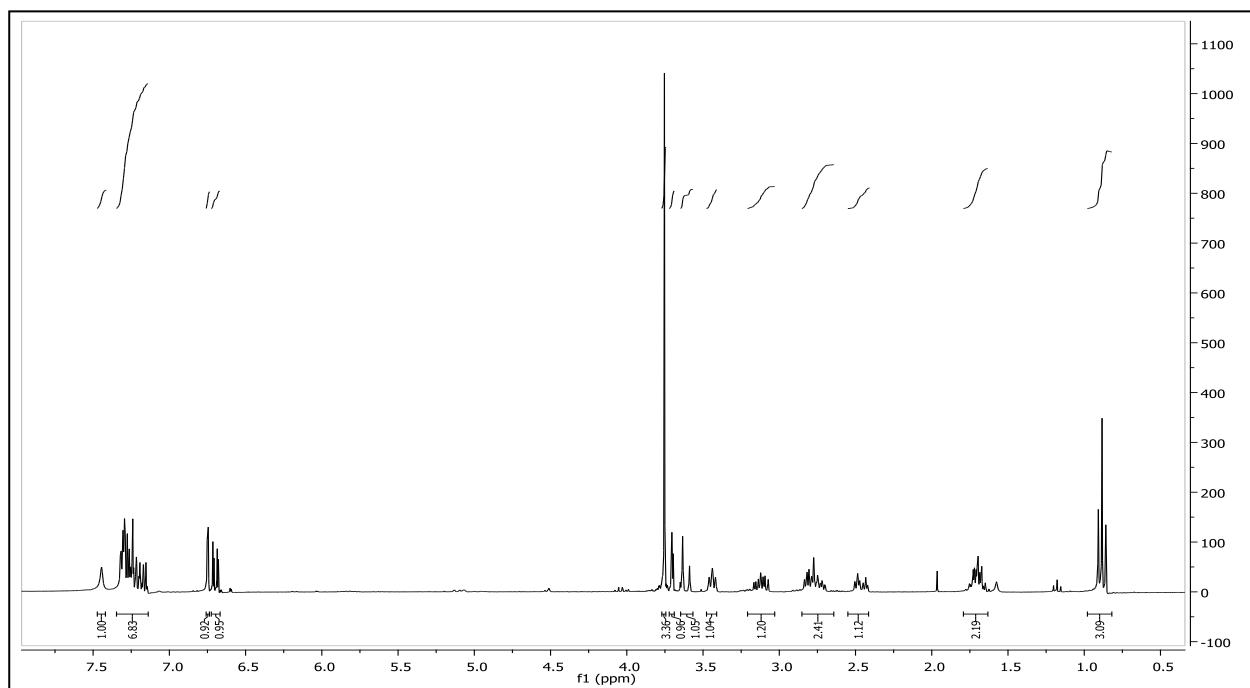

# <sup>13</sup>C NMR of 2j

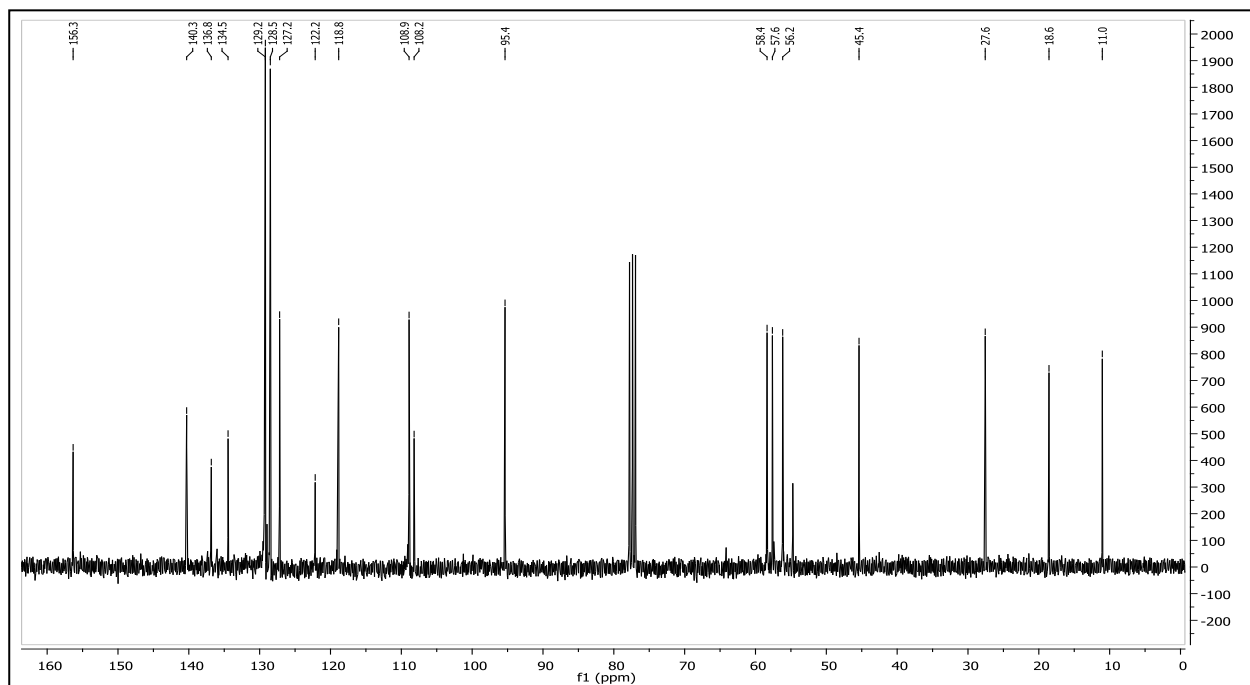

### THBC of 2k

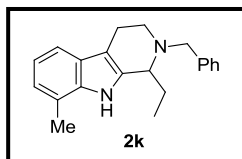

### RP-HPLC of 2k

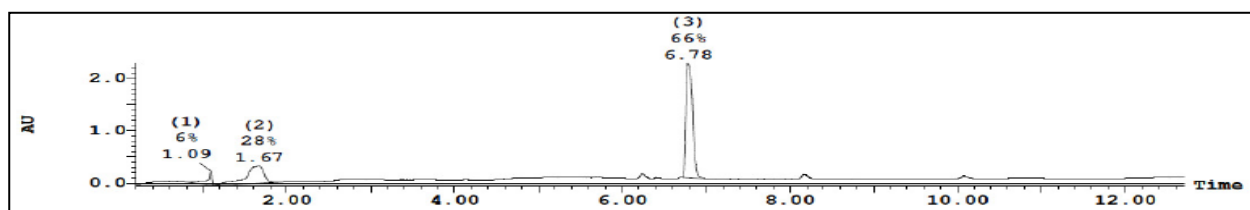

### IR of 2k

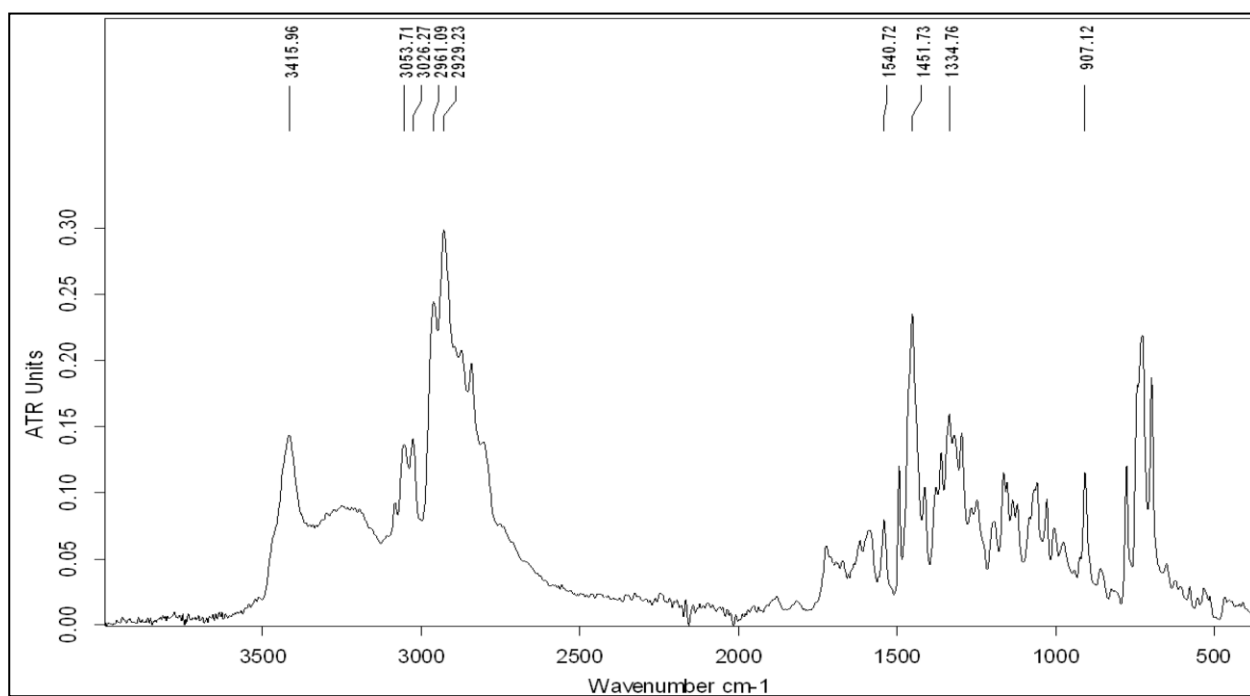

# **<sup>1</sup>H NMR of 2k**

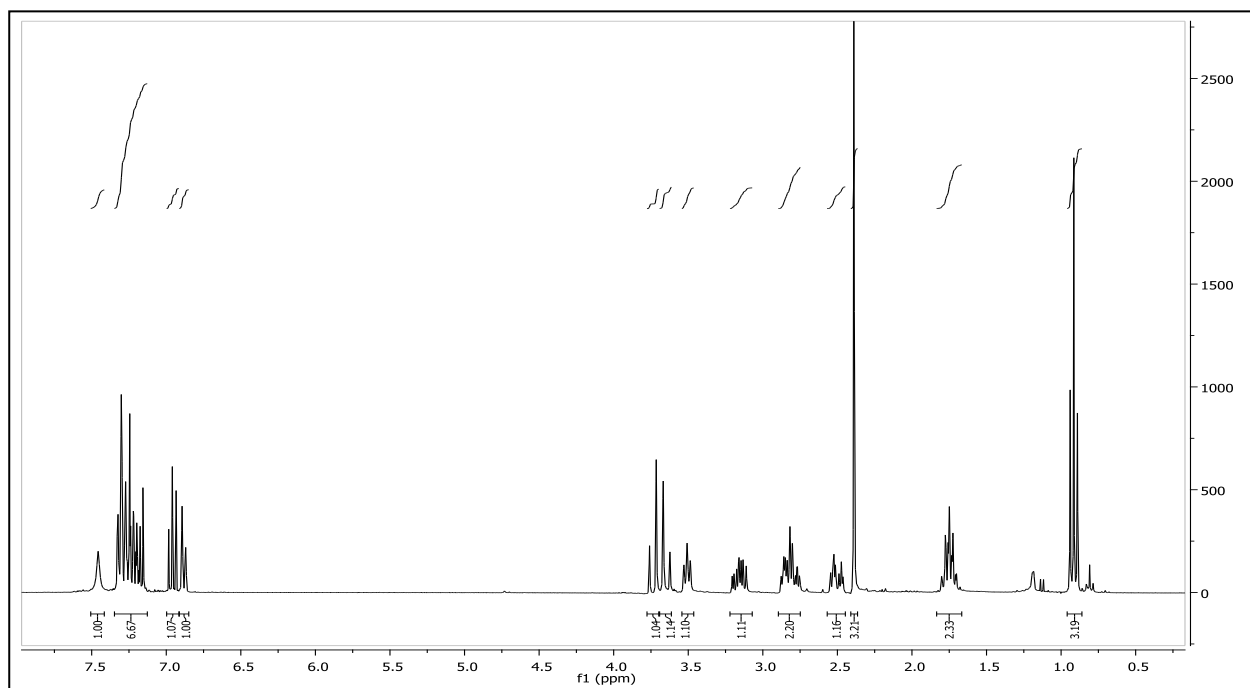

# **<sup>13</sup>C NMR of 2k**

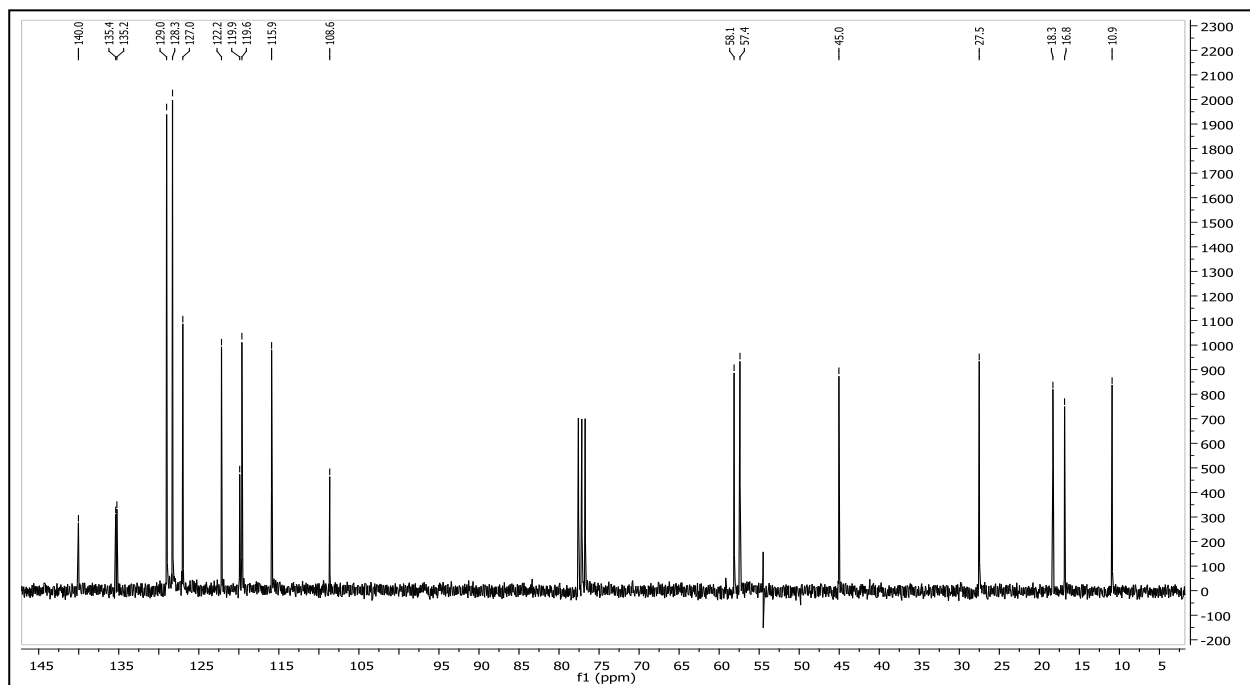

## THBC 2l

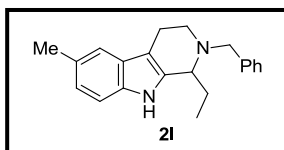

## RP-HPLC of 2l

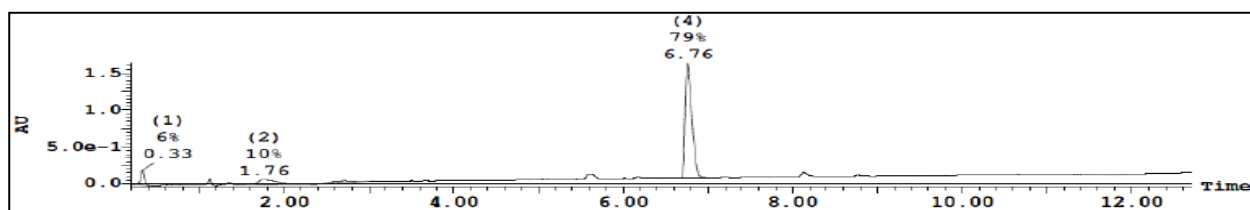

## IR of 2l

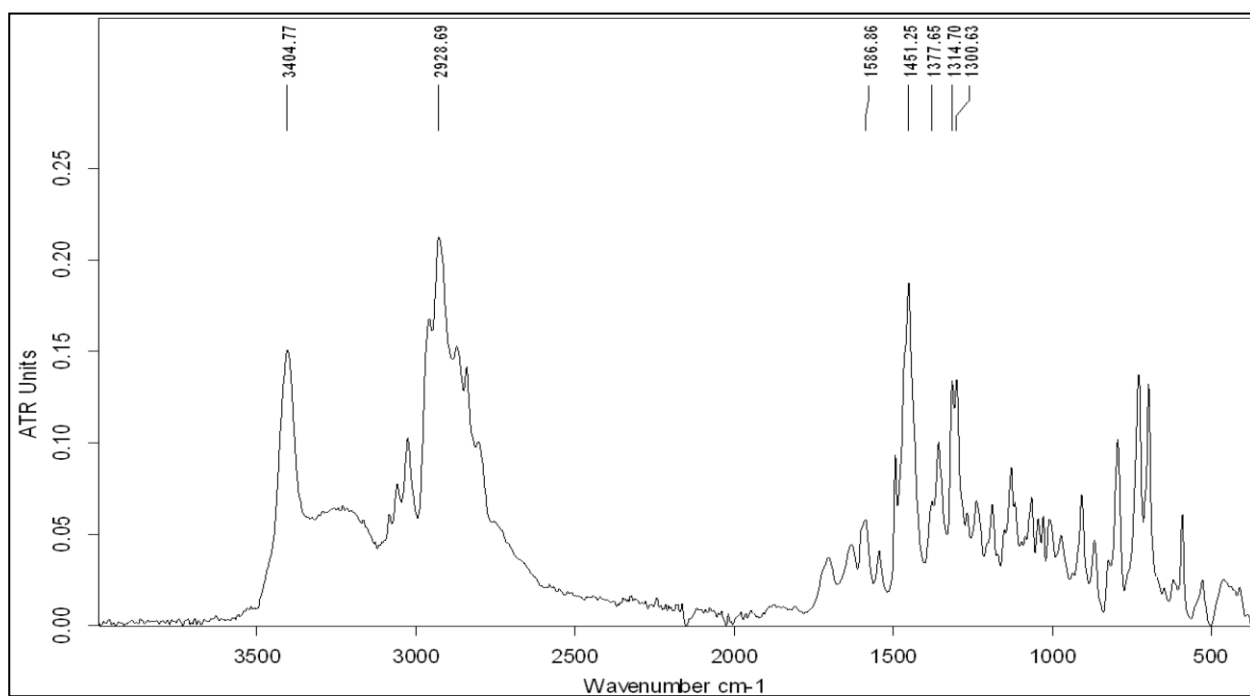

**<sup>1</sup>H NMR of 2l**

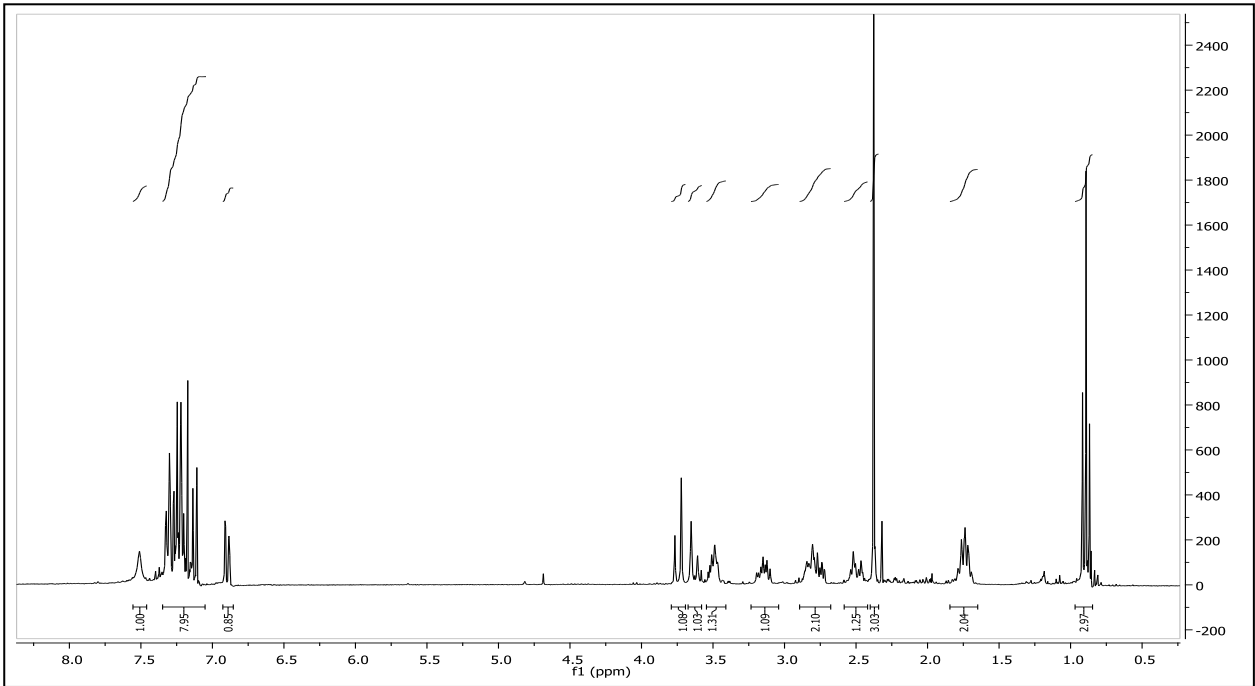

**<sup>13</sup>C NMR of 2l**

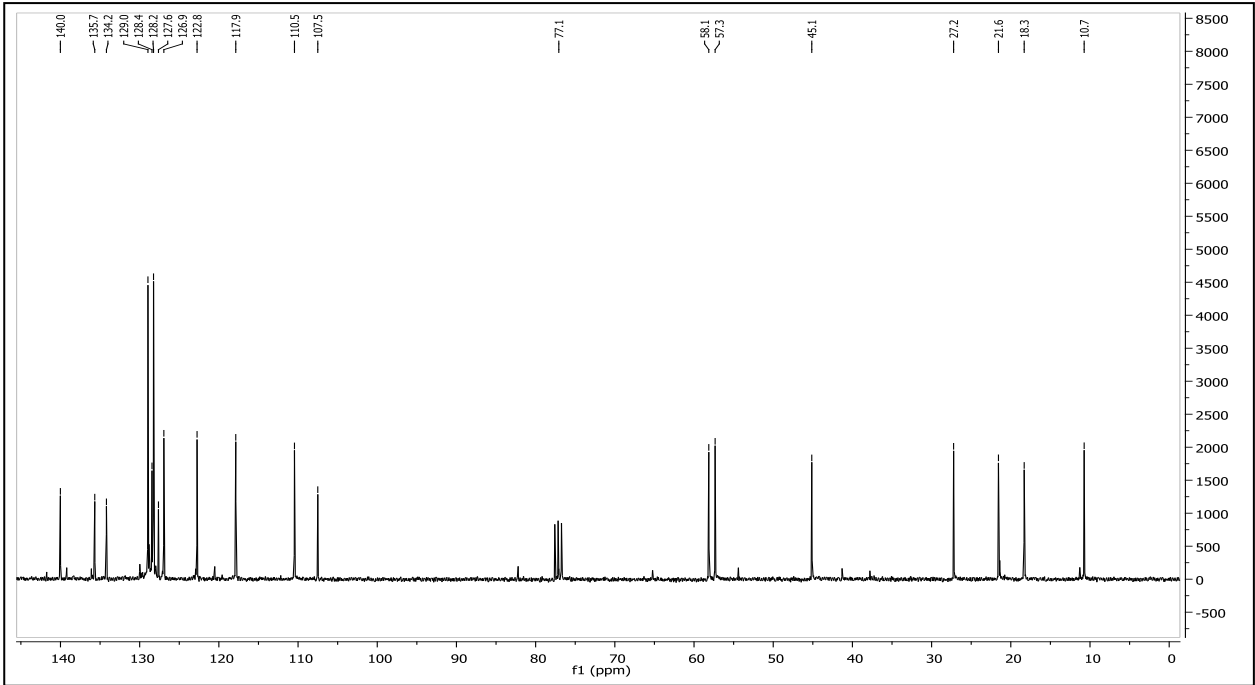

## THBC 2m

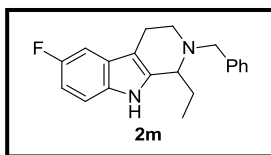

## RP-HPLC of 2m

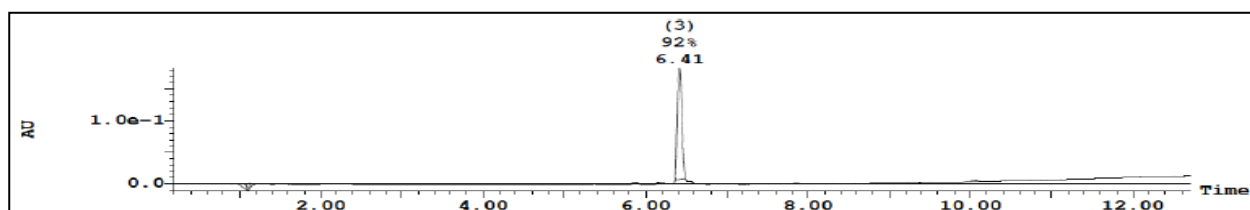

## IR of 2m

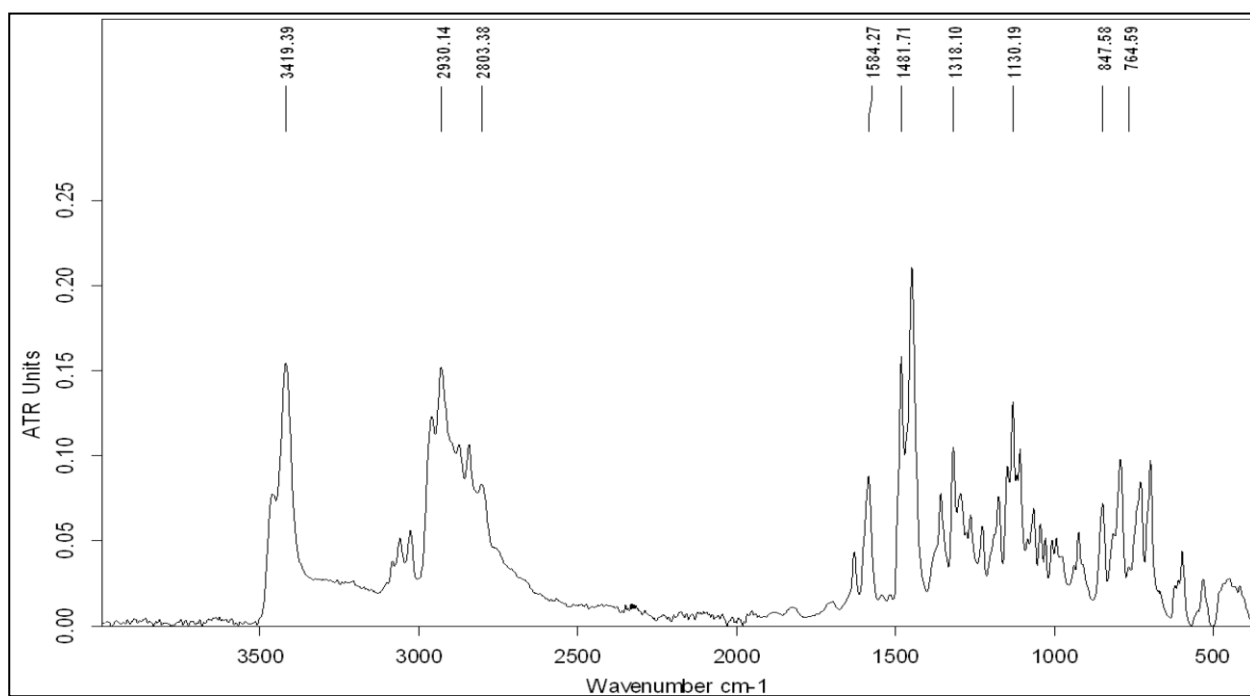



# **<sup>1</sup>H NMR of 2m**

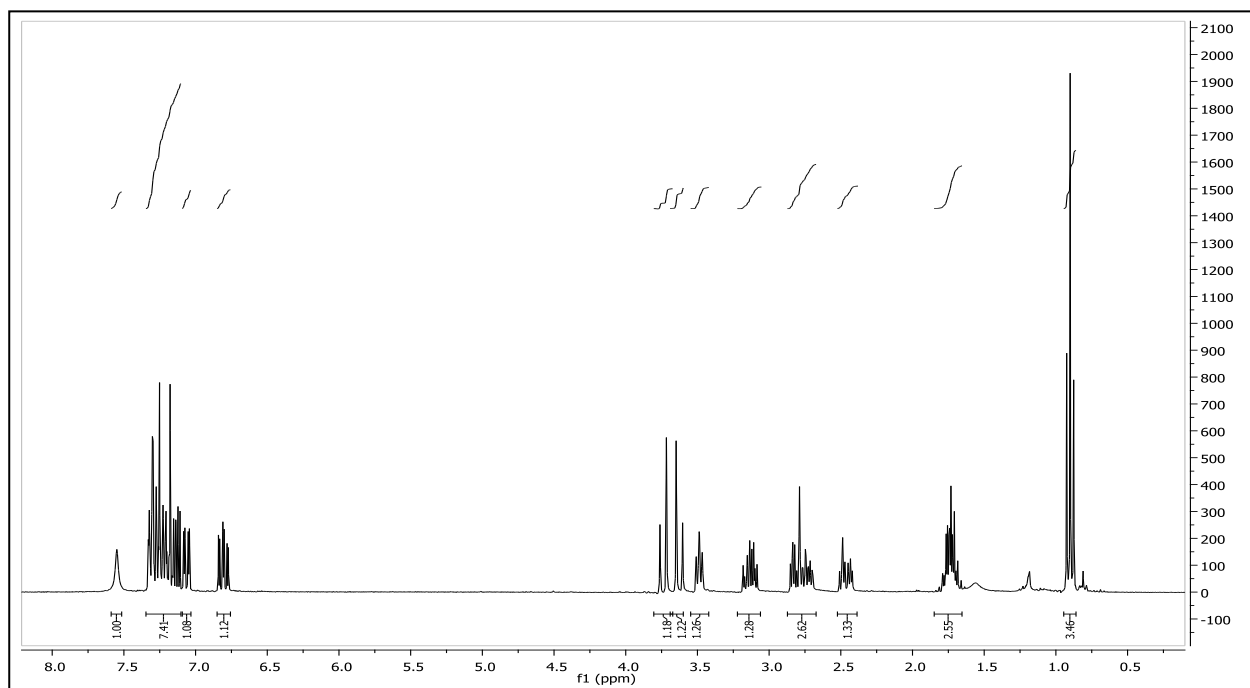

# **<sup>13</sup>C NMR of 2m**

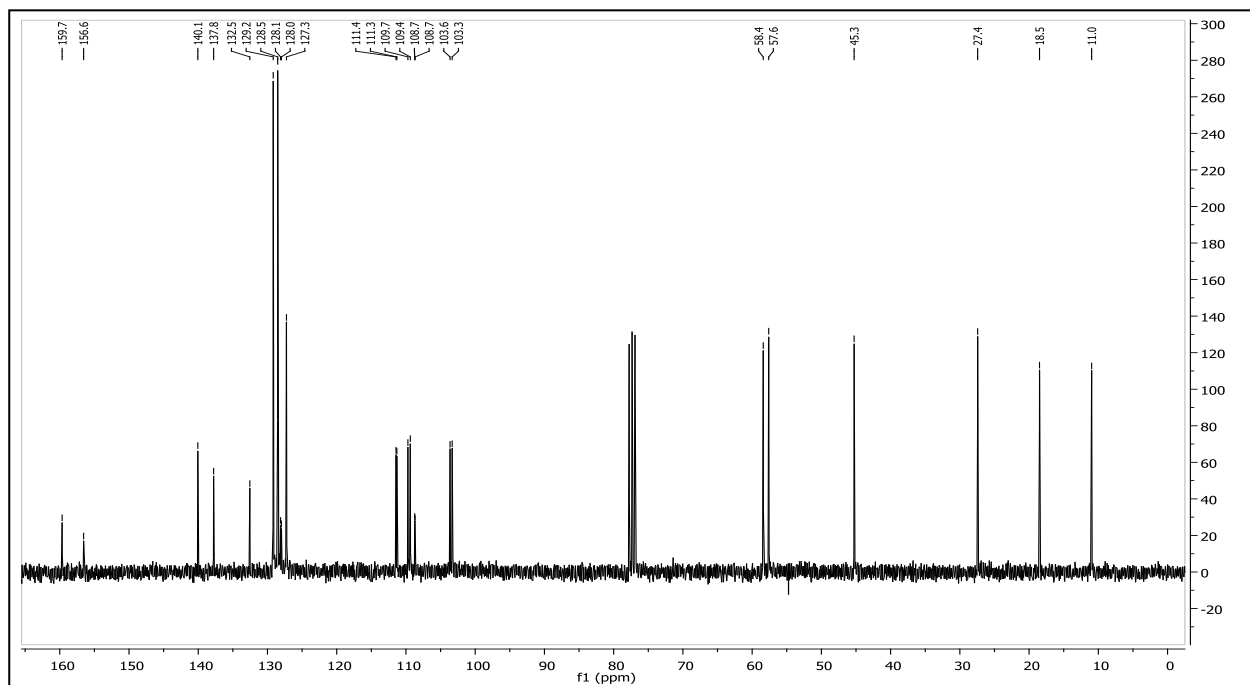

## THBC 2n

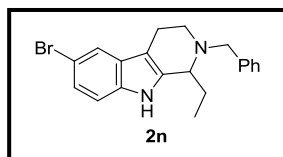

## RP-HPLC of 2n

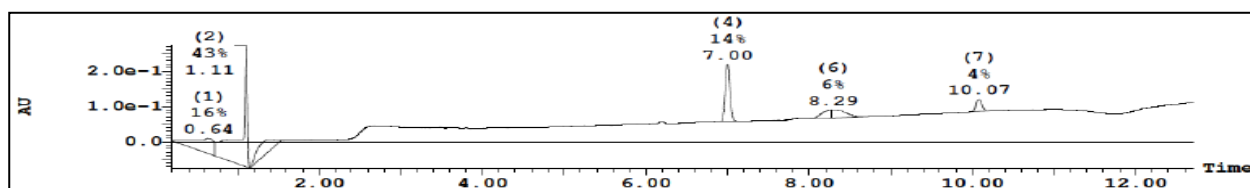

## IR of 2n

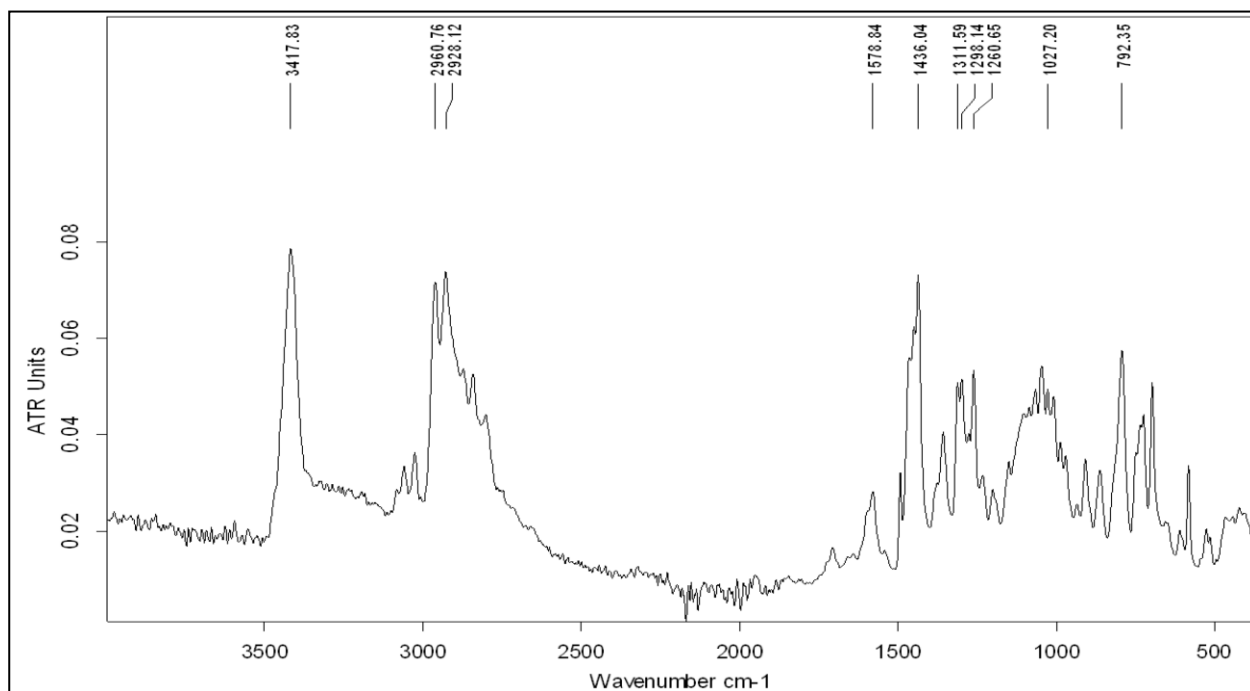

# <sup>1</sup>H NMR of 2n

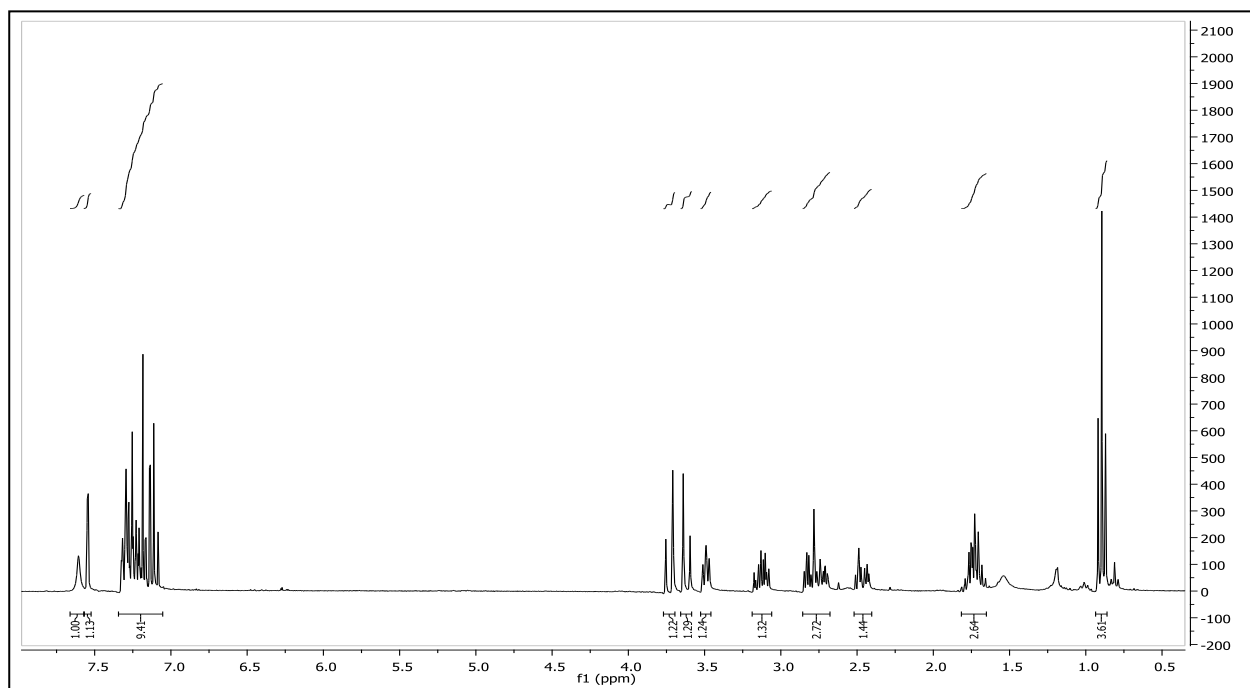

# <sup>13</sup>C NMR of 2n

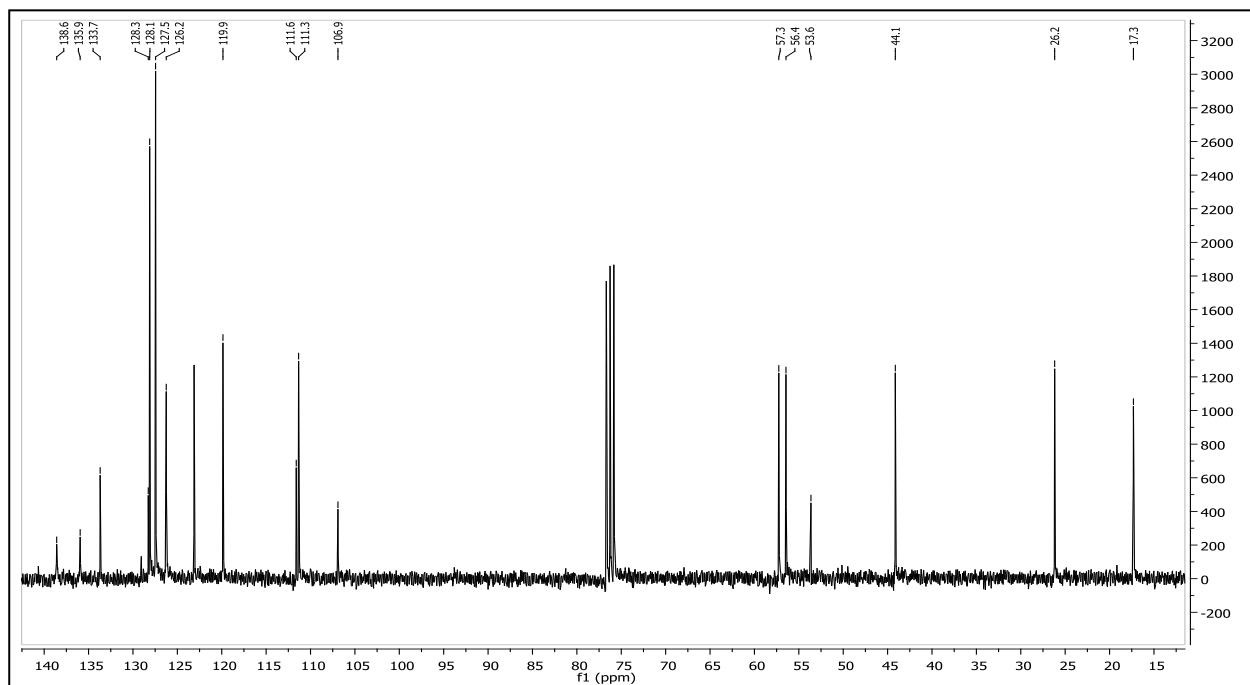

## THBC 2o

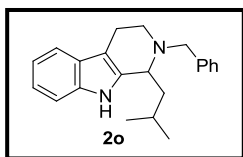

## RP-HPLC of 2o

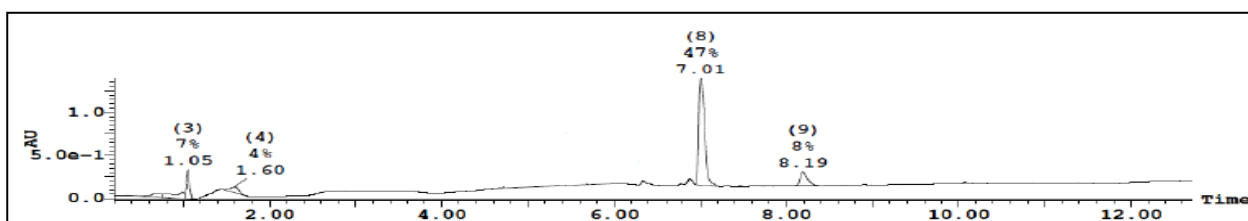

## IR of 2o

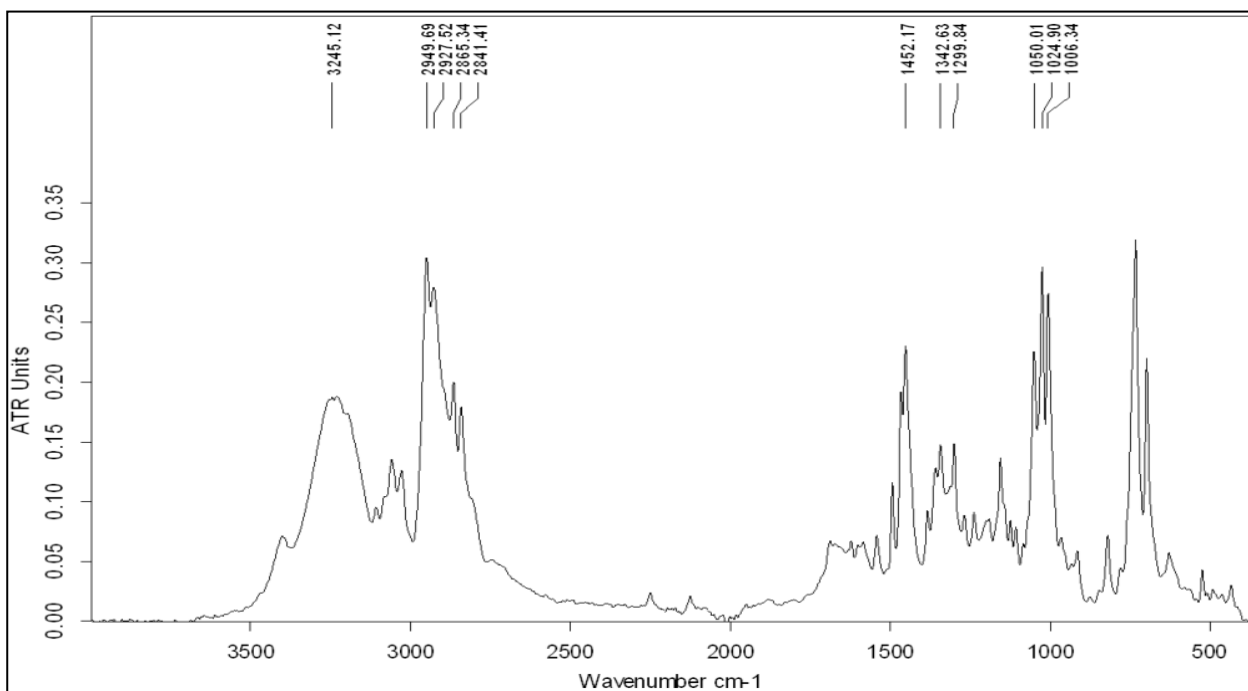

**<sup>1</sup>H NMR of 2o**

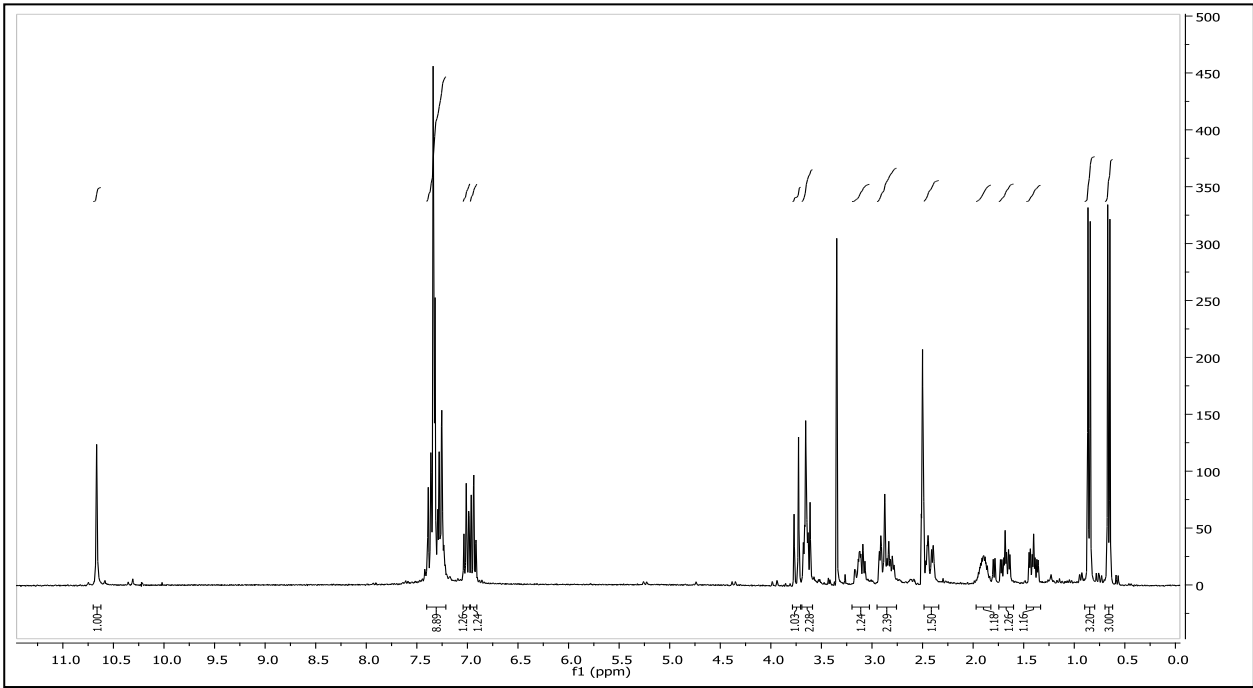

**<sup>13</sup>C NMR of 2o**

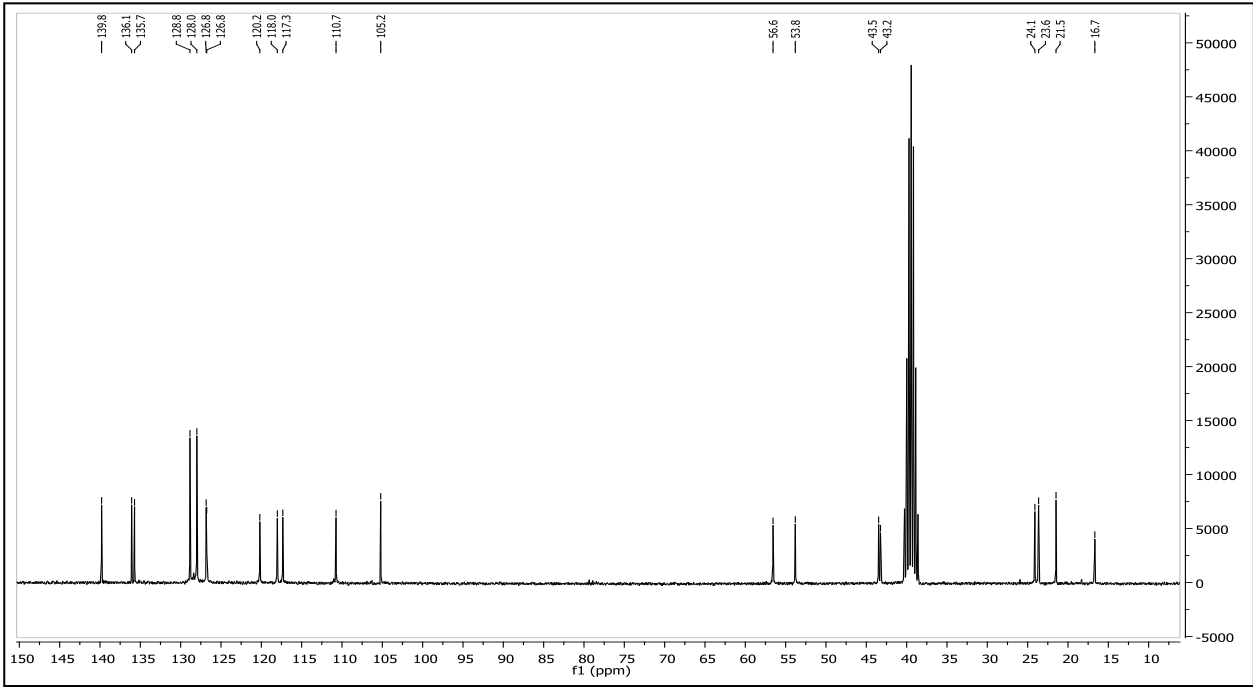

## THBC 2p

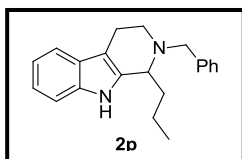

## RP-HPLC of 2p

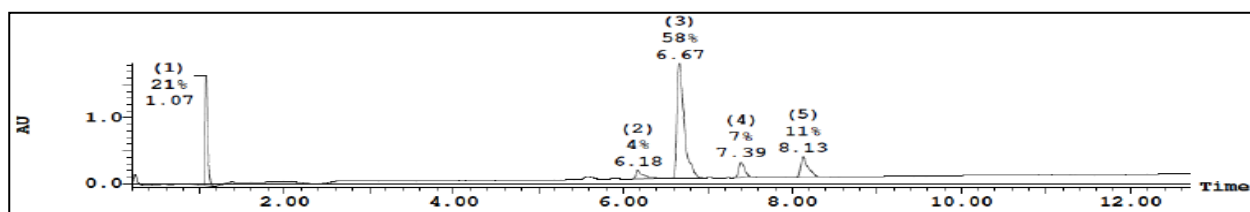

## IR of 2p

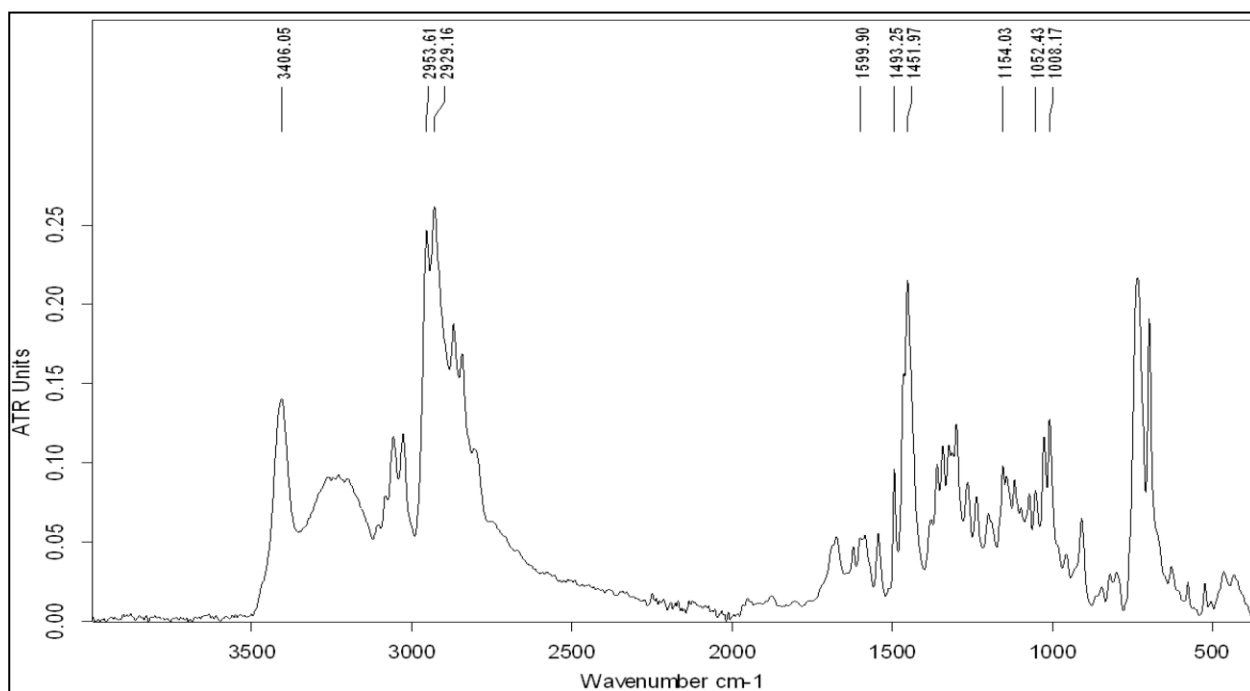

# **<sup>1</sup>H NMR of 2p**

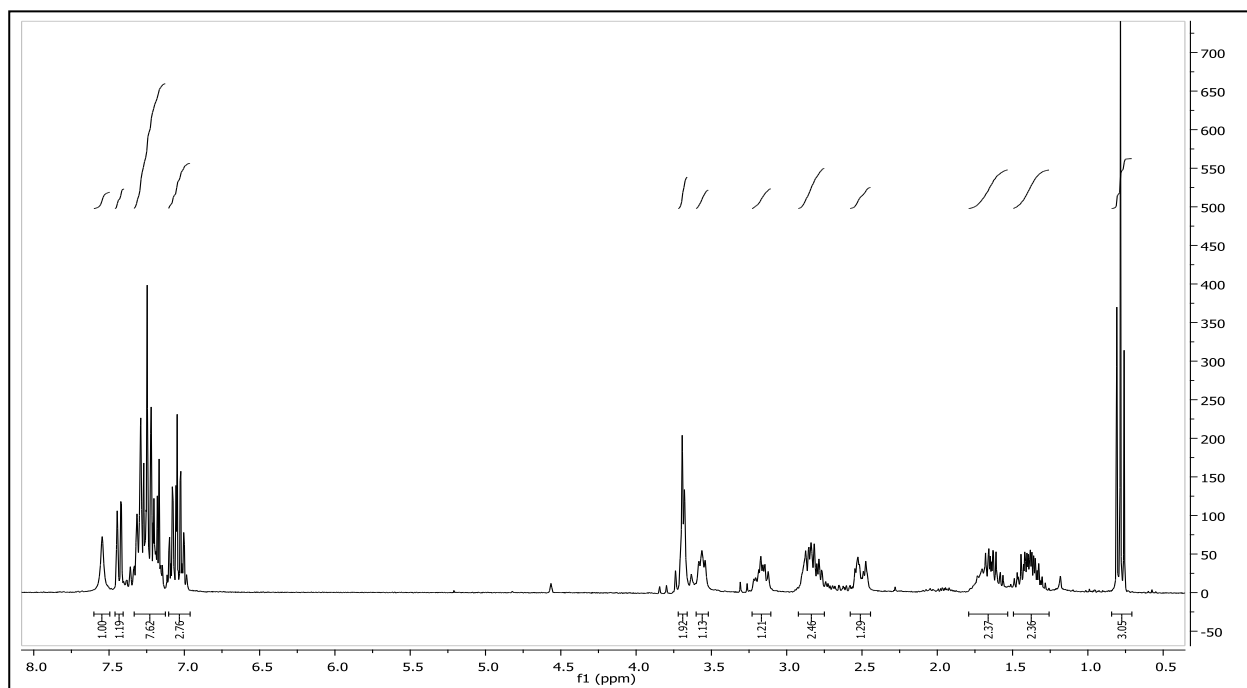

# **<sup>13</sup>C NMR of 2p**

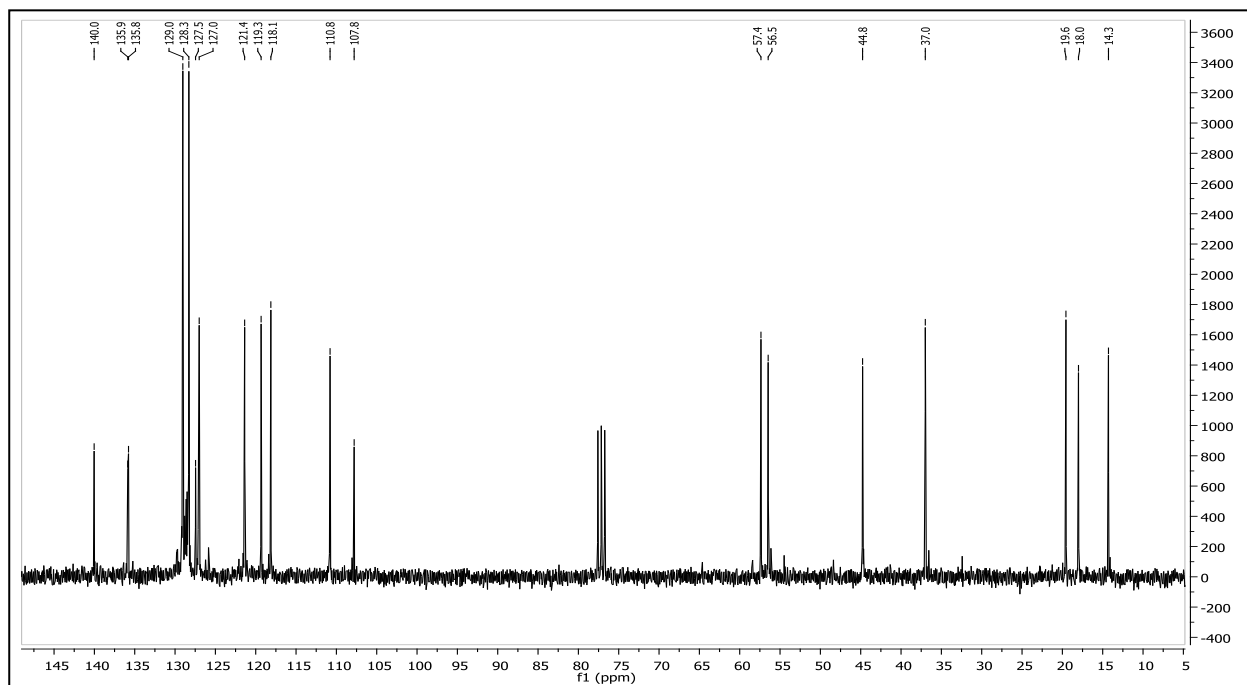

## THBC 2q

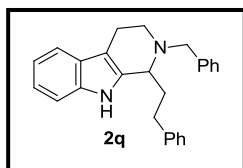

## RP-HPLC of 2q

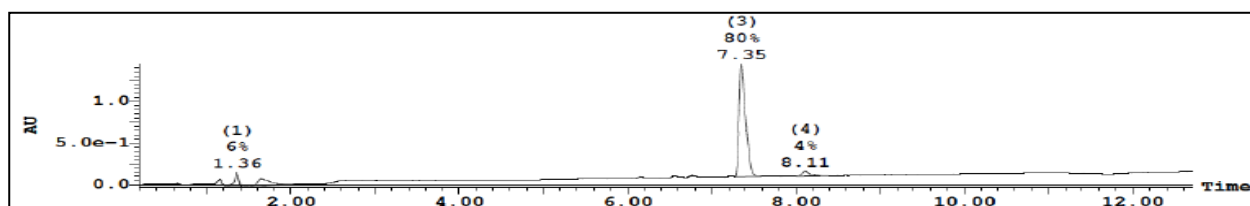

## IR of 2q

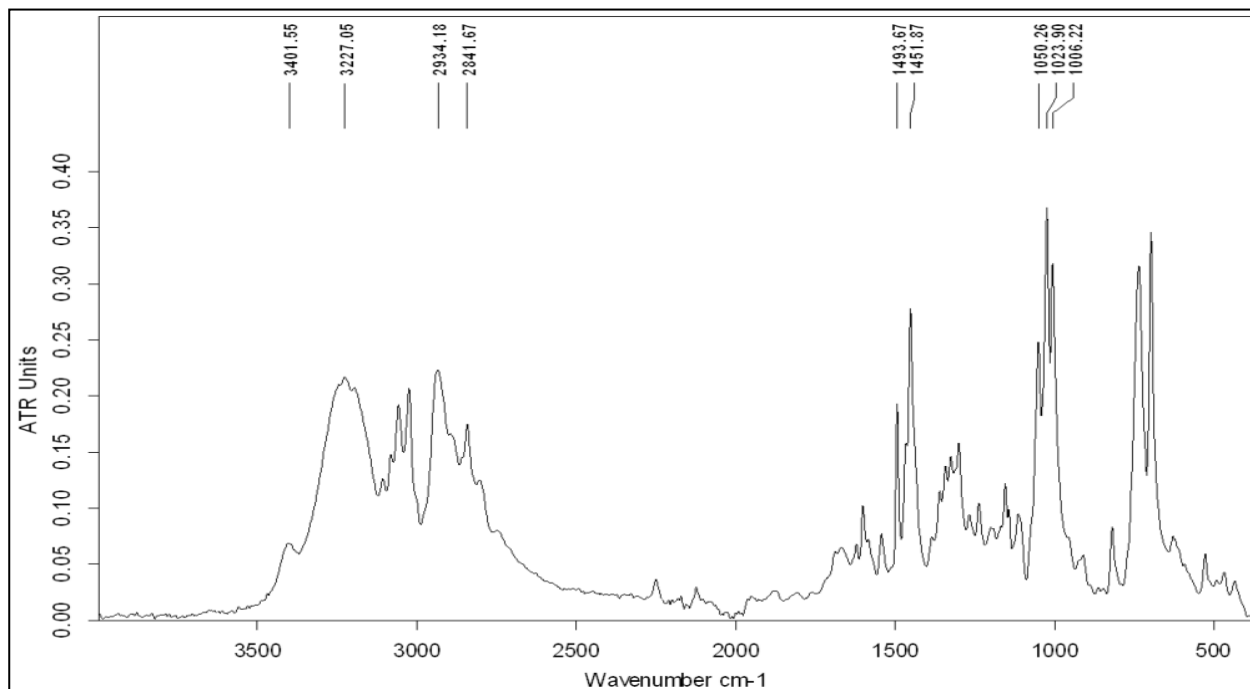



# **<sup>1</sup>H NMR of 2q**

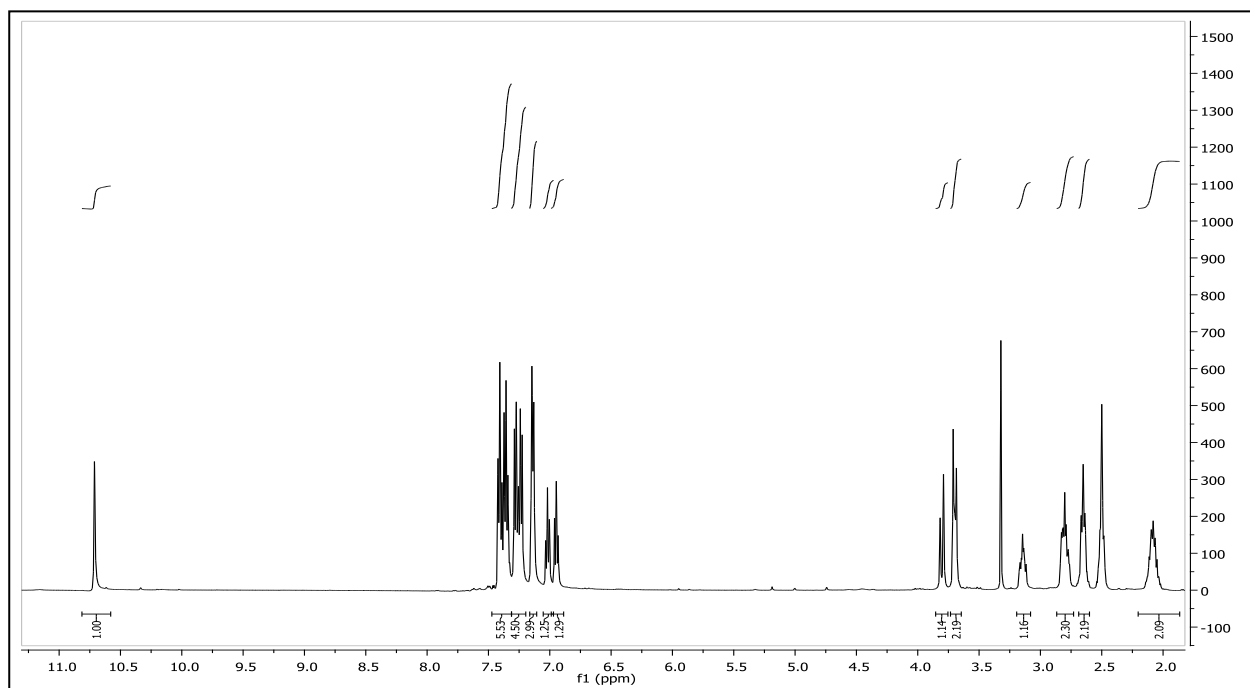

# **<sup>13</sup>C NMR of 2q**

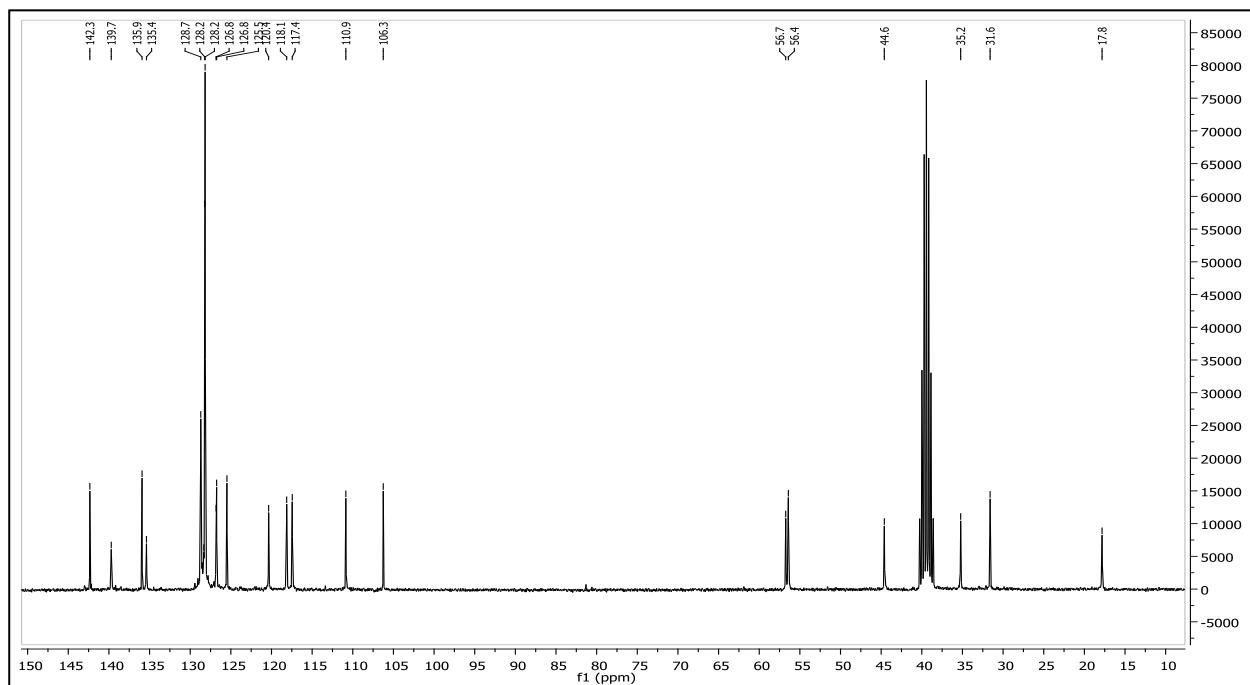

## THBC 2r

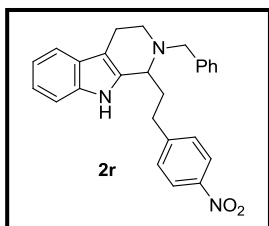

## RP-HPLC of 2r

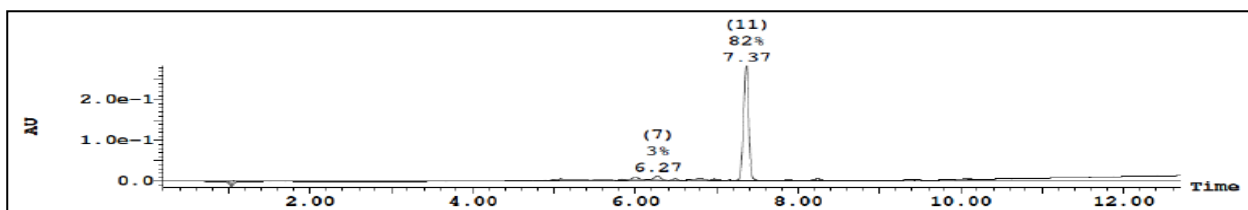

## IR of 2r

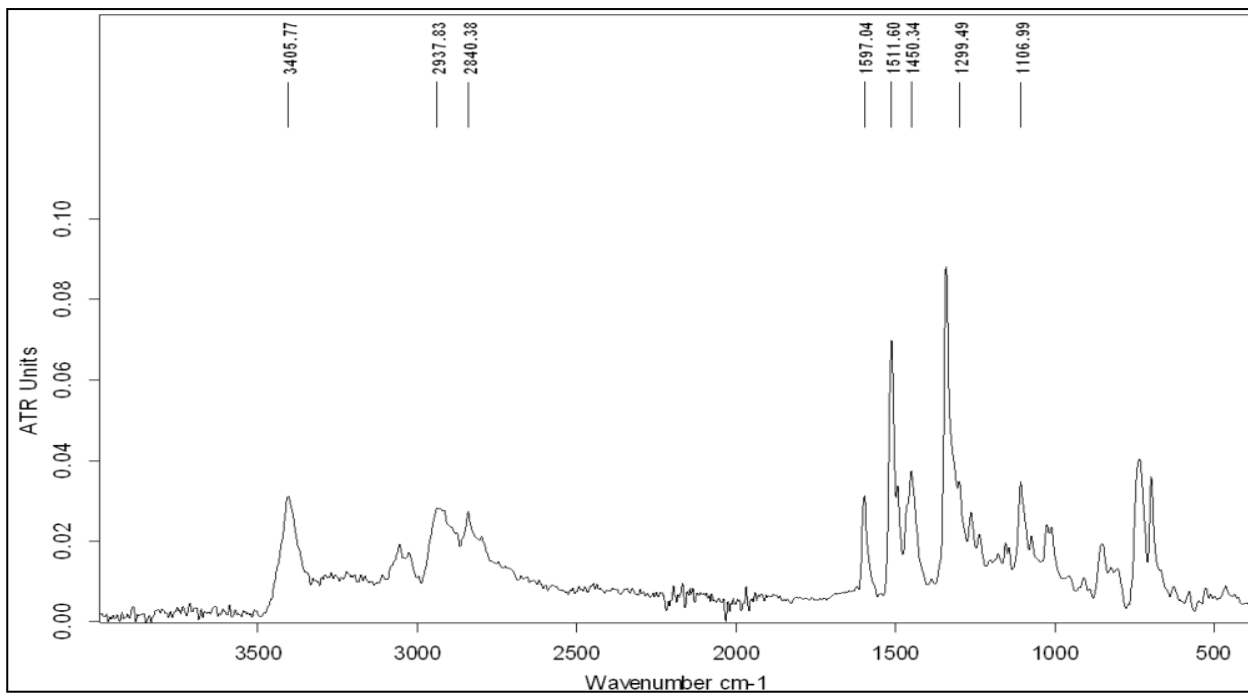

# **<sup>1</sup>H NMR of 2r**

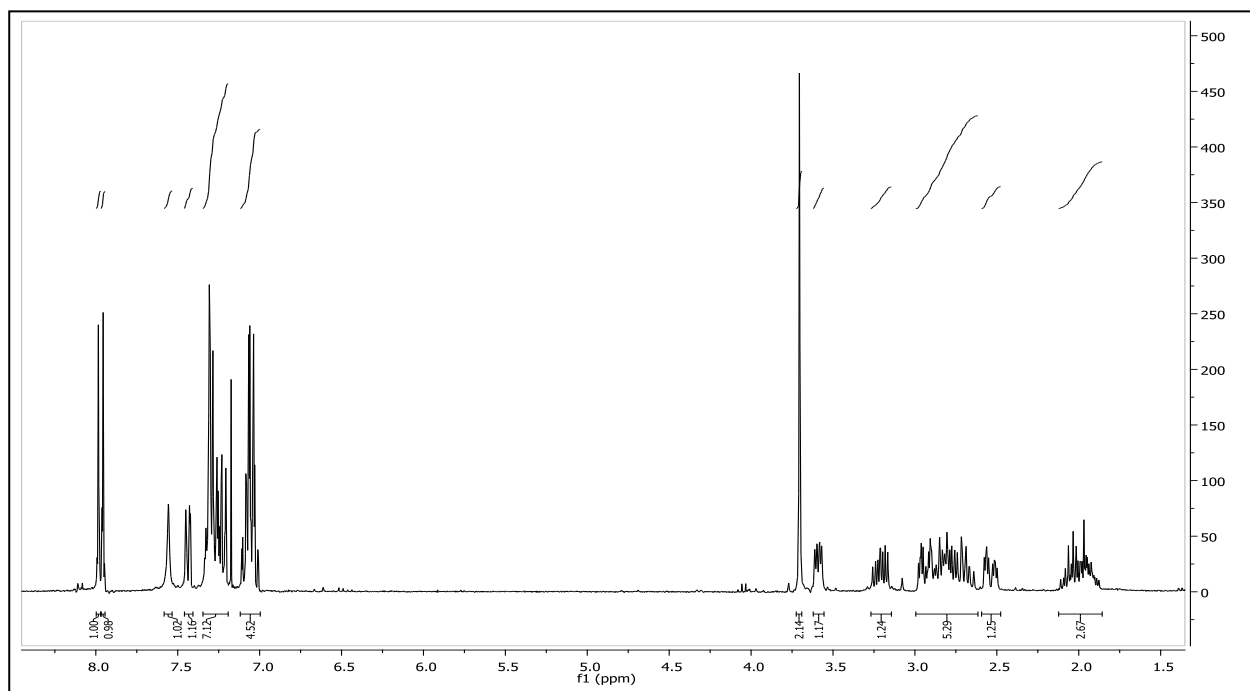

# **<sup>13</sup>C NMR of 2r**

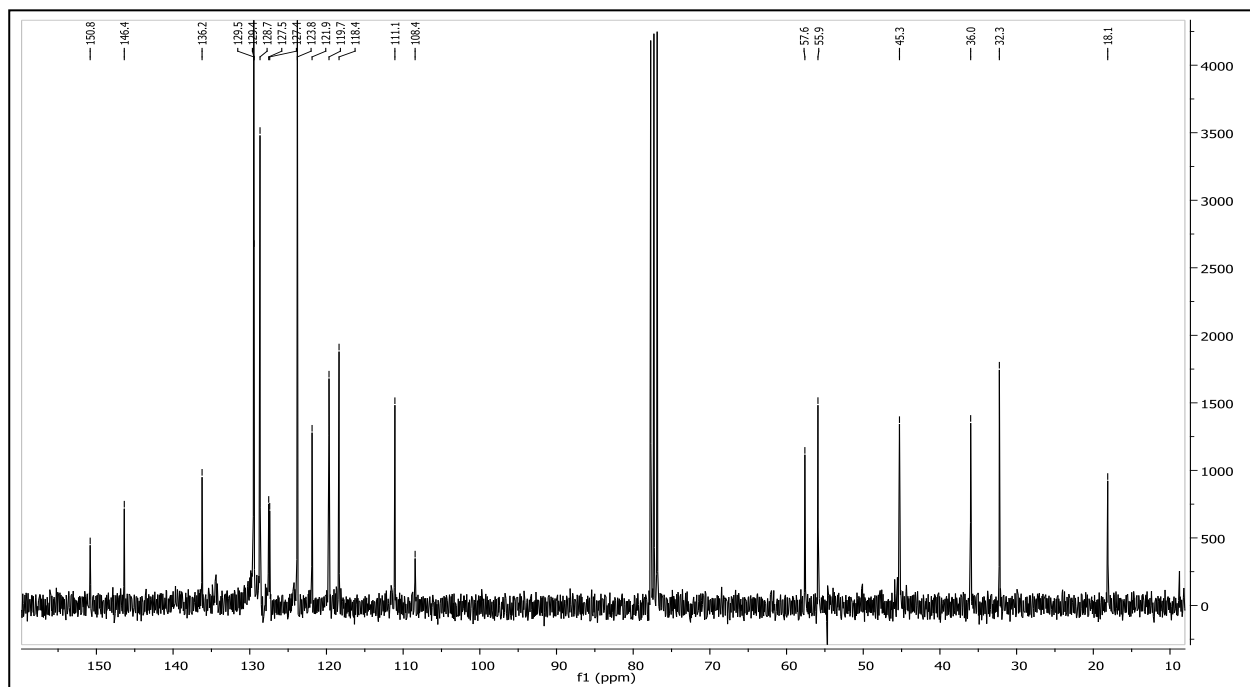

## THBC 2s

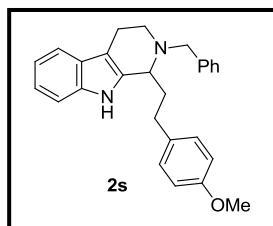

## RP-HPLC of 2s

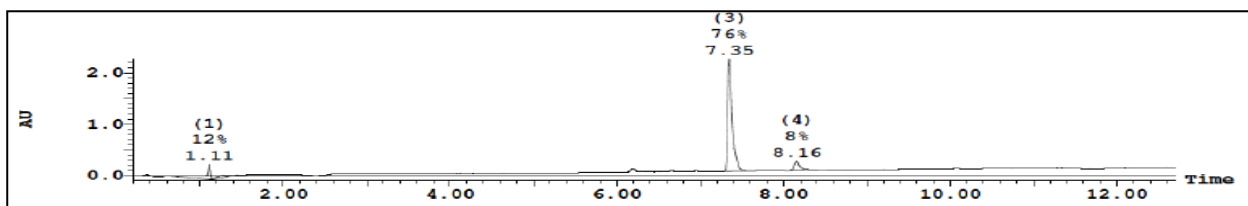

## IR of 2s

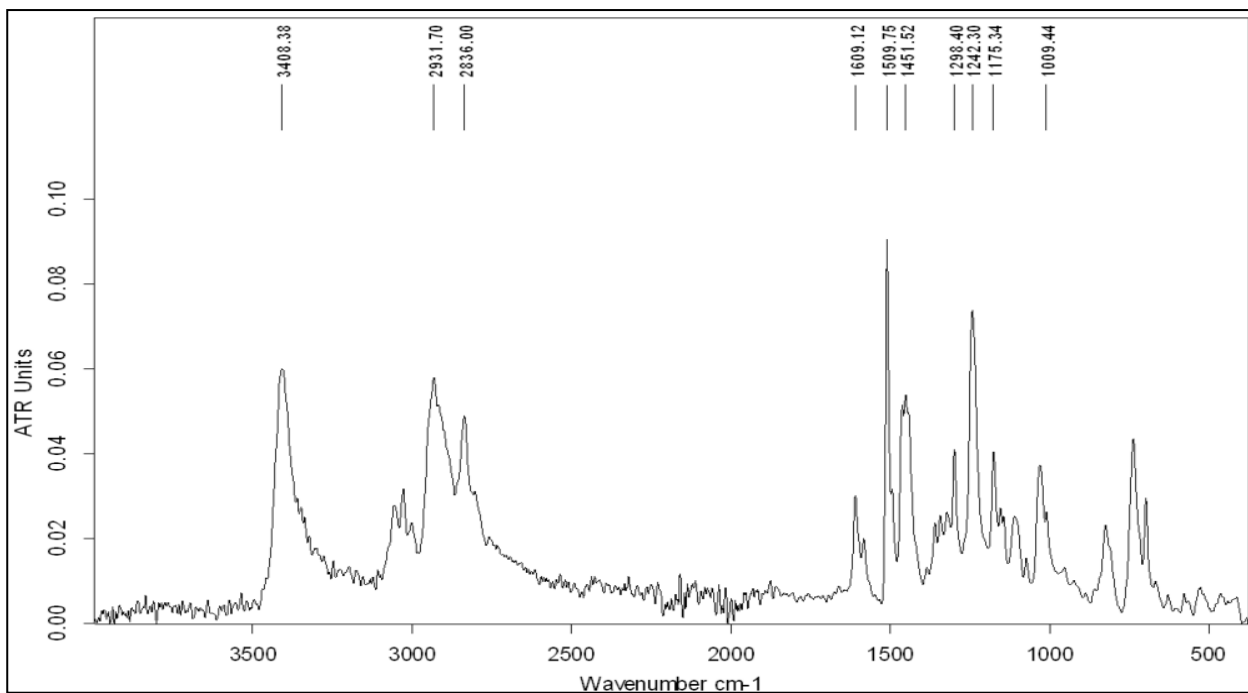

**<sup>1</sup>H NMR of 2s**

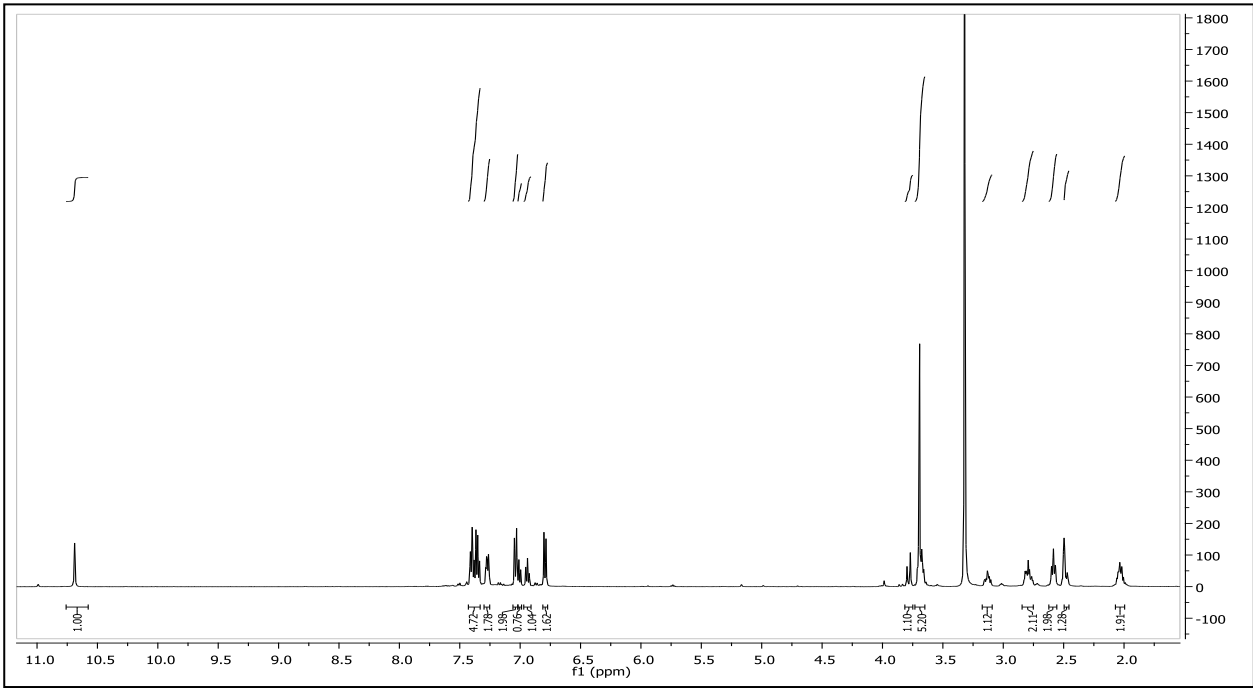

**<sup>13</sup>C NMR of 2s**

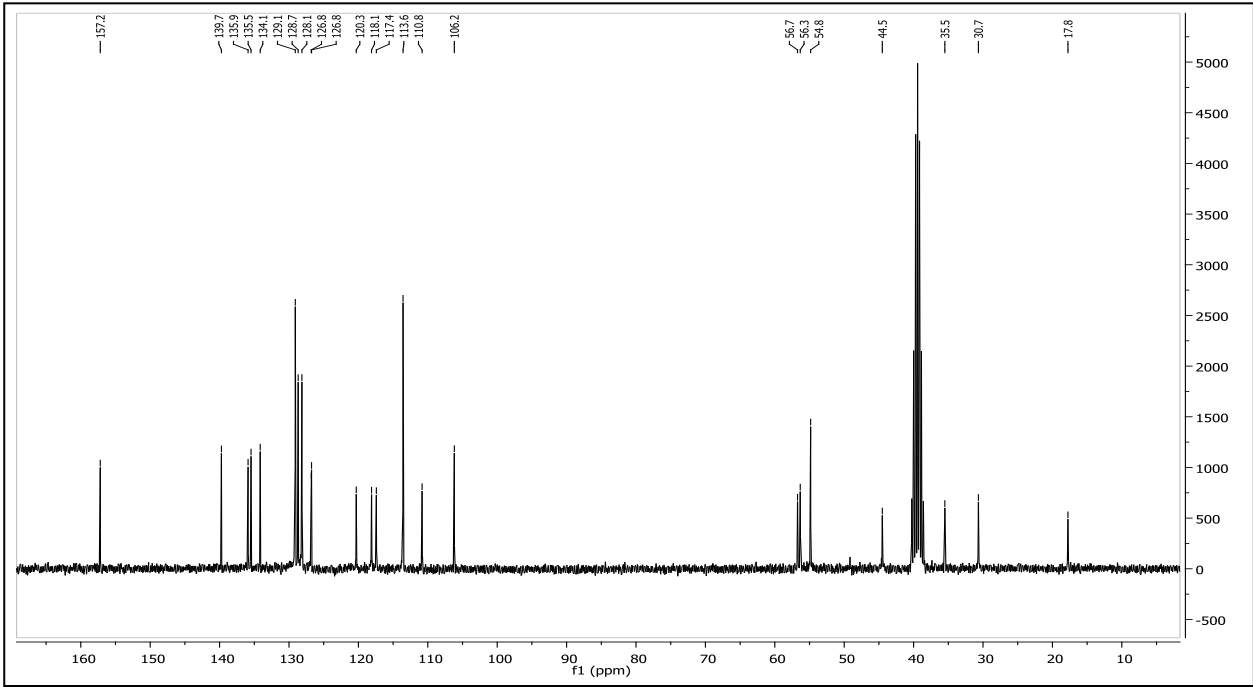

Supplement: c2cc17704h.pdf [file c2cc17704h.pdf]
